# Supplementary material for: Analysis of the Progeny of Sibling Matings Reveals Regulatory Variation Impacting the Transcriptome of Immune Cells in Commercial Chickens
Source: Front Genet. 2019 Nov 14;10:1032. doi: 10.3389/fgene.2019.01032 (PMC6870463; doi:10.3389/fgene.2019.01032)
Supplement: Supplementary file 8 [file Table_7.xlsx]

## Sheet:  Family H No LPS
Untreated BMDMs
									Functional annotation enrichment analysis
Gene name	Chr	Location (chr:start-end:strand)	Description	Average in Family H	Average in other families	Family H/ other families			DAVID analysis
ENSGALG00000044075	AADN04004223.1	AADN04004223.1:4668-5036:+1		14.5033	0	#DIV/0!			Down in Family H	Annotation Cluster 1	Enrichment Score: 5.327338448391823
ENSGALG00000044377	AADN04003187.1	AADN04003187.1:6902-7270:+1		14.5033	0	#DIV/0!				Category	Term	Count	%	PValue	Genes	List Total	Pop Hits	Pop Total	Fold Enrichment	Bonferroni	Benjamini	FDR
ENSGALG00000044448	AADN04009122.1	AADN04009122.1:5305-5673:+1		14.5033	0	#DIV/0!				UP_KEYWORDS	Secreted	42	3.63322	3.06848e-09	CSF3, IBSP, WFIKKN2, WNT16, CCK, FST, GREM1, CCL5, ST3GAL1, COL9A1, WNT4, OLFML3, COL9A2, COL9A3, CCL20, CRISPLD1, ACAN, IL1B, SEMA3A, LOXL2, COL8A1, COL11A1, IHH, COL10A1, COCH, BMP4, HAPLN1, COL22A1, MATN1, LYZ, LOC422654, MGP, FRZB, SERPINI1, PCOLCE2, LOC418892, LIPG, RELN, COL24A1, IGFBP2, EPYC, BMP8B	428	404	11626	2.82393	6.10628e-07	3.05314e-07	3.84287e-06
ENSGALG00000046195	AADN04003650.1	AADN04003650.1:10019-10387:+1		14.5033	0	#DIV/0!				UP_SEQ_FEATURE	signal peptide	36	3.11419	8.40476e-06	CSF3, IBSP, CCK, FGFRL1, FST, CDH1, SDC4, CCL5, GREM1, NRCAM, COL9A1, CDH7, LINGO1, WNT4, OLFML3, COL9A2, COL9A3, CRISPLD1, EOGT, ACAN, SEMA3A, COL8A1, IHH, IL13RA2, IL4, COCH, BMP4, MATN1, SDK2, LYZ, LIFR, MGP, FRZB, SERPINI1, IGFBP2, EPYC	80	484	2162	2.01012	0.00282841	0.00282841	0.0114297
LOC107050037	.	.	platelet glycoprotein VI-like	8.5865	0.0295455	290.62				UP_KEYWORDS	Glycoprotein	38	3.2872	1.80242e-05	CSF3, IBSP, AVPR2, CPQ, NPY2R, FGFRL1, FST, ANPEP, CDH1, CDH3, GREM1, SDC4, ST3GAL1, NRCAM, GPC4, AGTR1, CDH7, LINGO1, WNT4, OLFML3, COL9A2, COL9A3, EOGT, ACAN, HS6ST2, SEMA3A, LOXL2, COCH, BMP4, MINPP1, HAPLN1, MATN1, SDK2, FRZB, SERPINI1, RELN, SEMA4D, EPYC	428	483	11626	2.13709	0.00358043	0.000717114	0.0225706
EGFL6	1	1:123018708-123059075:-1	EGF like domain multiple 6	25.2257	0.301636	83.6294				UP_SEQ_FEATURE	disulfide bond	28	2.42215	2.93306e-05	CSF3, NPY2R, FGFRL1, FST, CCL5, GREM1, NRCAM, ST3GAL1, LINGO1, AGTR1, COL9A1, OLFML3, COL9A2, CRISPLD1, NMRAL1, ACAN, SEMA3A, COCH, BMP4, HAPLN1, SDK2, MATN1, LYZ, MGP, FRZB, SEMA4D, EPYC, IGFBP2	80	340	2162	2.22559	0.00983588	0.00493009	0.0398818
LOC107057327	.	.	E3 ubiquitin-protein ligase RNF114-like	1.49483	0.0240909	62.0497				UP_SEQ_FEATURE	glycosylation site:N-linked (GlcNAc...)	30	2.59516	0.000169309	CSF3, IBSP, NPY2R, FGFRL1, FST, CDH1, CDH3, SDC4, GREM1, NRCAM, ST3GAL1, LINGO1, CDH7, AGTR1, WNT4, OLFML3, COL9A3, EOGT, ACAN, HS6ST2, SEMA3A, COCH, BMP4, HAPLN1, MATN1, SDK2, FRZB, SERPINI1, SEMA4D, EPYC	80	417	2162	1.94424	0.0554645	0.0188409	0.230012
ENSGALG00000042560	AADN04003946.1	AADN04003946.1:4529-5748:-1		3.73	0.120409	30.9777
ENSGALG00000046163	AADN04003708.1	AADN04003708.1:11941-13914:-1		1.23683	0.0437727	28.2558				Annotation Cluster 2	Enrichment Score: 3.596602178398259
LOC107049379	.	.	coiled-coil domain-containing protein 81-like	5.785	0.297045	19.4751				Category	Term	Count	%	PValue	Genes	List Total	Pop Hits	Pop Total	Fold Enrichment	Bonferroni	Benjamini	FDR
LOC107050390	.	.	natural cytotoxicity triggering receptor 1-like	12.9125	0.686682	18.8042				UP_KEYWORDS	Transmembrane helix	141	12.1972	0.000108133	BLB2, SLC22A16, MPZL2, SLC13A5, SLC6A2, BTC, FGFRL1, TNFSF15, LPAR4, GRIN3A, NRCAM, ST3GAL1, AGTR1, ATP2B2, ADTRP, KCNK5, SMIM5, HTR1E, CHIR-IG1-5, PTPRK, PTPRM, PDPN, CA12, LIFR, CHODL, CERCAM, LOC107049470, CD72AG, SSTR2, LHFPL5, THBD, LRAT, ATP9A, HTR7, ST14, HAS2, LOC100859798, DCBLD2, FRAS1, SLC38A3, LPPR5, ENPP1, CYSLTR2, ENPP3, LPPR1, KCNA3, SORCS1, MME, LOC100857837, CD72, ZPLD1, SEMA5B, …	428	2891	11626	1.32482	0.0212896	0.00358017	0.135337
LOC107049387	.	.	coiled-coil domain-containing protein 81-like	1.26967	0.0686364	18.4985				UP_KEYWORDS	Transmembrane	141	12.1972	0.000123879	BLB2, SLC22A16, MPZL2, SLC13A5, SLC6A2, BTC, FGFRL1, TNFSF15, LPAR4, GRIN3A, NRCAM, ST3GAL1, AGTR1, ATP2B2, ADTRP, KCNK5, SMIM5, HTR1E, CHIR-IG1-5, PTPRK, PTPRM, PDPN, CA12, LIFR, CHODL, CERCAM, LOC107049470, CD72AG, SSTR2, LHFPL5, THBD, LRAT, ATP9A, HTR7, ST14, HAS2, LOC100859798, DCBLD2, FRAS1, SLC38A3, LPPR5, ENPP1, CYSLTR2, ENPP3, LPPR1, KCNA3, SORCS1, MME, LOC100857837, CD72, ZPLD1, SEMA5B, …	428	2899	11626	1.32117	0.024352	0.00351572	0.155031
LOC101749724	.	.	uncharacterized LOC101749724	6.789	0.412864	16.4437				UP_KEYWORDS	Membrane	150	12.9758	0.000286436	BLB2, SLC22A16, SLC13A5, MPZL2, SLC6A2, BTC, FGFRL1, TNFSF15, LPAR4, GRIN3A, NRCAM, ST3GAL1, AGTR1, ATP2B2, ADTRP, SEMA7A, KCNK5, SMIM5, HTR1E, CHIR-IG1-5, PTPRK, PTPRM, PDPN, CA12, LIFR, CHODL, CERCAM, LOC107049470, CTNNA2, CD72AG, SSTR2, LHFPL5, THBD, LRAT, ATP9A, HTR7, ST14, HAS2, LOC100859798, DCBLD2, FRAS1, PALM, SLC38A3, LPPR5, ENPP1, CYSLTR2, ENPP3, LPPR1, KCNA3, SORCS1, MME, LOC100857837,…	428	3177	11626	1.28251	0.0554144	0.00631432	0.358132
ENSGALG00000043977	AADN04002120.1	AADN04002120.1:14277-17174:+1		2.67317	0.179136	14.9225				GOTERM_CC_DIRECT	GO:0016021~integral component of membrane	111	9.60208	0.00107056	BLB2, MPZL2, BTC, FGFRL1, LPAR4, TNFSF15, NRCAM, AGTR1, ADTRP, SMIM5, PTPRK, CHIR-IG1-5, PTPRM, PDPN, CA12, LIFR, CHODL, CERCAM, LOC107049470, CD72AG, LHFPL5, LRAT, HTR7, ATP9A, ST14, FRAS1, DCBLD2, ENPP1, ENPP3, SORCS1, MME, LOC100857837, CD72, ZPLD1, SEMA5B, SERINC2, B3GNT5, GPR27, FAM213A, B3GNT7, MFAP3L, STX11, PRIMA1, GAL3ST1, BEAN1, GABRA4, TLR15, RHBDF1, LAMP5, SLC7A1, SUSD1, ATP10A, DPP10…	362	2357	10057	1.30835	0.195423	0.0425558	1.33681
ENSGALG00000044712	LGE64	LGE64:840103-842999:+1		2.67317	0.179136	14.9225
ENSGALG00000045184	AADN04001767.1	AADN04001767.1:9066-11961:+1		2.67317	0.179136	14.9225				Annotation Cluster 3	Enrichment Score: 3.525932859319623
ENSGALG00000039602	AADN04006989.1	AADN04006989.1:7863-9705:+1		2.7315	0.19	14.3763				Category	Term	Count	%	PValue	Genes	List Total	Pop Hits	Pop Total	Fold Enrichment	Bonferroni	Benjamini	FDR
ENSGALG00000045749	AADN04002298.1	AADN04002298.1:10510-12712:+1		1.58317	0.113955	13.893				INTERPRO	IPR003599:Immunoglobulin subtype	24	2.07612	5.10093e-06	WFIKKN2, PTPRK, CHIR-IG1-5, HAPLN1, PXDN, HAPLN3, MPZL2, PTPRM, ADAMTSL3, IGFBP7, FGFRL1, SDK2, NEXN, NRCAM, LINGO1, IGSF11, ACAN, SEMA4D, SEMA3A, MFAP3L, JAM3, CHL1, KALRN, CHIR-B5	407	220	11164	2.99236	0.00415372	0.00415372	0.00785002
LOC101749141	.	.	leukocyte immunoglobulin-like receptor subfamily A member 2-like	2.11967	0.179318	11.8207				SMART	SM00409:IG	24	2.07612	8.94251e-06	WFIKKN2, PTPRK, CHIR-IG1-5, HAPLN1, PXDN, HAPLN3, MPZL2, PTPRM, ADAMTSL3, IGFBP7, FGFRL1, SDK2, NEXN, NRCAM, LINGO1, IGSF11, ACAN, SEMA4D, SEMA3A, MFAP3L, JAM3, CHL1, KALRN, CHIR-B5	230	220	5997	2.84443	0.0017155	0.0017155	0.011133
ENSGALG00000033584	AADN04004058.1	AADN04004058.1:1375-4447:-1		20.9278	1.80459	11.597				INTERPRO	IPR013783:Immunoglobulin-like fold	33	2.85467	2.04157e-05	BLB2, WFIKKN2, PXDN, MPZL2, ADAMTSL3, IGFBP7, F13A1, FGFRL1, NRCAM, IGSF11, LINGO1, FNDC5, SEMA7A, ACAN, TGM2, TGM4, MFAP3L, SEMA3A, CHIR-B5, IL13RA2, HAPLN1, CHIR-IG1-5, PTPRK, HAPLN3, PTPRM, SDK2, LIFR, NEXN, EGFLAM, SEMA4D, JAM3, CHL1, KALRN	407	397	11164	2.28007	0.0165214	0.00829508	0.031415
ENSGALG00000033747	AADN04002022.1	AADN04002022.1:13506-14474:+1		14.9993	1.37041	10.9452				INTERPRO	IPR007110:Immunoglobulin-like domain	26	2.24913	2.32633e-05	WFIKKN2, BLB2, PXDN, MPZL2, ADAMTSL3, IGFBP7, FGFRL1, NRCAM, LINGO1, IGSF11, SEMA7A, ACAN, SEMA3A, MFAP3L, CHIR-B5, HAPLN1, CHIR-IG1-5, PTPRK, PTPRM, HAPLN3, SDK2, NEXN, SEMA4D, JAM3, CHL1, KALRN	407	275	11164	2.59338	0.018804	0.00630771	0.0357961
LOC107055383	.	.	uncharacterized LOC107055383	6.9235	0.652636	10.6085				INTERPRO	IPR013098:Immunoglobulin I-set	13	1.12457	0.000693208	NRCAM, WFIKKN2, LINGO1, PTPRK, PXDN, ADAMTSL3, IGFBP7, FGFRL1, SDK2, MFAP3L, NEXN, CHL1, KALRN	407	111	11164	3.21252	0.432125	0.0609369	1.06154
ENSGALG00000044116	AADN04016688.1	AADN04016688.1:2392-4381:+1		1.73417	0.182591	9.49755				UP_KEYWORDS	Immunoglobulin domain	10	0.865052	0.0133584	NRCAM, HAPLN1, LINGO1, PXDN, PTPRM, FGFRL1, SDK2, ACAN, SEMA4D, SEMA3A	428	103	11626	2.63724	0.931179	0.199901	15.5005
ENSGALG00000045515	2	2:373417-374786:-1		5.91483	0.627182	9.43081				INTERPRO	IPR003598:Immunoglobulin subtype 2	12	1.03806	0.0151832	NRCAM, IGSF11, WFIKKN2, LINGO1, PXDN, ADAMTSL3, FGFRL1, SDK2, MFAP3L, JAM3, CHL1, KALRN	407	143	11164	2.30182	0.999996	0.464323	20.9793
LOC101749614	.	.	uncharacterized LOC101749614	2.83517	0.318	8.91562				SMART	SM00408:IGc2	12	1.03806	0.0203617	NRCAM, IGSF11, WFIKKN2, LINGO1, PXDN, ADAMTSL3, FGFRL1, SDK2, MFAP3L, JAM3, CHL1, KALRN	230	143	5997	2.18802	0.980741	0.262014	22.5953
ENSGALG00000040094	AADN04009907.1	AADN04009907.1:3124-5402:+1		6.2945	0.726864	8.65981
LOC101749549	.	.	coiled-coil domain-containing protein 81-like	1.51133	0.175864	8.59378				Annotation Cluster 4	Enrichment Score: 2.8382425299574705
LOC101751375	.	.	T-cell-interacting, activating receptor on myeloid cells protein 1-like	2.97	0.350091	8.48351				Category	Term	Count	%	PValue	Genes	List Total	Pop Hits	Pop Total	Fold Enrichment	Bonferroni	Benjamini	FDR
ENSGALG00000044103	AADN04000971.1	AADN04000971.1:28666-29368:+1		6.5365	0.792909	8.24369				INTERPRO	IPR001791:Laminin G domain	8	0.692042	0.000828802	COL9A1, LAMA4, EGFLAM, LAMA5, COL22A1, COL24A1, THBS1, COL11A1	407	43	11164	5.10325	0.491649	0.0654202	1.26795
LOC107049383	.	.	uncharacterized LOC107049383	1.68217	0.204727	8.21662				INTERPRO	IPR013320:Concanavalin A-like lectin/glucanase, subgroup	13	1.12457	0.00110807	PTPRK, PTPRM, COL22A1, CG-16, COL9A1, LAMA4, EGFLAM, LAMA5, COMP, MEP1A, COL24A1, THBS1, COL11A1	407	117	11164	3.04778	0.595332	0.0789532	1.69179
ENSGALG00000043381	2	2:44146929-44151846:+1		1.972	0.253455	7.78049				SMART	SM00210:TSPN	5	0.432526	0.00332854	COL9A1, COL22A1, COL24A1, THBS1, COL11A1	230	17	5997	7.6688	0.472784	0.147887	4.06602
ENSGALG00000046537	AADN04008545.1	AADN04008545.1:3733-4825:+1		2.62333	0.350591	7.48261
CHIR-B6	.	.	immunoglobulin-like receptor CHIR-B6	6.585	0.984045	6.69176				Annotation Cluster 5	Enrichment Score: 2.629797103116787
LOC100858385	.	.	platelet glycoprotein VI-like	5.10217	0.769091	6.63402				Category	Term	Count	%	PValue	Genes	List Total	Pop Hits	Pop Total	Fold Enrichment	Bonferroni	Benjamini	FDR
OSTN	9	9:13761297-13772476:-1	osteocrin	6.16817	0.965727	6.38707				GOTERM_MF_DIRECT	GO:0005540~hyaluronic acid binding	6	0.519031	0.000151481	HAPLN1, TNFAIP6, HAPLN3, LOC420721, ACAN, CEMIP	318	15	8532	10.7321	0.0573707	0.0195014	0.210303
CD28	7	7:13495614-13507829:-1	CD28 molecule	2.49033	0.402091	6.19346				INTERPRO	IPR016186:C-type lectin-like	10	0.865052	0.000194528	CD72AG, HAPLN1, TNFAIP6, HAPLN3, THBD, CLEC3A, LOC420721, ACAN, CHODL, CD72	407	57	11164	4.81228	0.14679	0.0312513	0.298959
ENSGALG00000045471	AADN04001403.1	AADN04001403.1:3591-4774:+1		2.337	0.383682	6.09098				INTERPRO	IPR016187:C-type lectin fold	10	0.865052	0.000475843	CD72AG, HAPLN1, TNFAIP6, HAPLN3, THBD, CLEC3A, LOC420721, ACAN, CHODL, CD72	407	64	11164	4.28593	0.321846	0.0626796	0.729819
ENSGALG00000033897	AADN04006143.1	AADN04006143.1:9011-11484:+1		9.17183	1.57355	5.82877				INTERPRO	IPR000538:Link	5	0.432526	0.000676176	HAPLN1, TNFAIP6, HAPLN3, LOC420721, ACAN	407	12	11164	11.4292	0.424172	0.075821	1.03559
ENSGALG00000033176	AADN04003671.1	AADN04003671.1:3600-5694:-1		1.581	0.273682	5.77678				SMART	SM00445:LINK	5	0.432526	0.000804818	HAPLN1, TNFAIP6, HAPLN3, LOC420721, ACAN	230	12	5997	10.8641	0.143231	0.0743819	0.997406
ENSGALG00000037794	AADN04001643.1	AADN04001643.1:10499-11719:+1		9.6595	1.68323	5.73868				GOTERM_BP_DIRECT	GO:0001501~skeletal system development	7	0.605536	0.00317006	HAPLN1, WFIKKN2, HAPLN3, MMP9, FGFRL1, ACAN, NPR3	341	39	8994	4.73404	0.990453	0.403595	5.1245
ENSGALG00000031048	AADN04006867.1	AADN04006867.1:6853-9324:+1		19.655	3.45468	5.68938				INTERPRO	IPR001304:C-type lectin	6	0.519031	0.0272049	CD72AG, THBD, CLEC3A, ACAN, CHODL, CD72	407	47	11164	3.5017	1	0.57922	34.5892
ENSGALG00000042997	AADN04001456.1	AADN04001456.1:8026-10496:-1		19.655	3.45468	5.68938				SMART	SM00034:CLECT	6	0.519031	0.0323676	CD72AG, THBD, CLEC3A, ACAN, CHODL, CD72	230	47	5997	3.32858	0.998195	0.343714	33.6116
LCAT	11	11:1094450-1100820:-1	lecithin-cholesterol acyltransferase	12.7972	2.26623	5.6469				INTERPRO	IPR013106:Immunoglobulin V-set	7	0.605536	0.100795	HAPLN1, IGSF11, PXDN, HAPLN3, MPZL2, ACAN, JAM3	407	88	11164	2.18193	1	0.879309	80.5066
ENSGALG00000034517	AADN04004930.1	AADN04004930.1:10273-14202:-1		1.26917	0.227455	5.57987
ENSGALG00000033114	AADN04005449.1	AADN04005449.1:5398-6778:+1		2.16383	0.390091	5.547				Annotation Cluster 6	Enrichment Score: 2.5782367992076063
ENSGALG00000045481	AADN04005143.1	AADN04005143.1:8429-10875:+1		3.1305	0.576318	5.4319				Category	Term	Count	%	PValue	Genes	List Total	Pop Hits	Pop Total	Fold Enrichment	Bonferroni	Benjamini	FDR
ENSGALG00000045445	AADN04001186.1	AADN04001186.1:11979-14595:+1		7.464	1.38864	5.37506				GOTERM_MF_DIRECT	GO:0005201~extracellular matrix structural constituent	9	0.778547	4.04791e-05	HAPLN1, PXDN, HAPLN3, COL27A1, MATN1, ACAN, MGP, COL24A1, COL11A1	318	36	8532	6.70755	0.0156632	0.00786251	0.0562377
ENSGALG00000044876	AADN04002305.1	AADN04002305.1:6292-8727:+1		9.09817	1.72505	5.27416				INTERPRO	IPR008160:Collagen triple helix repeat	9	0.778547	0.000684562	COL9A1, COL9A2, COL9A3, COL27A1, COL22A1, COL24A1, COL8A1, COL11A1, COL10A1	407	54	11164	4.57166	0.428102	0.0674656	1.04837
ENSGALG00000045201	AADN04004315.1	AADN04004315.1:1808-2332:+1		8.462	1.60505	5.27212				INTERPRO	IPR000885:Fibrillar collagen, C-terminal	3	0.259516	0.0400974	COL27A1, COL24A1, COL11A1	407	9	11164	9.14333	1	0.659456	46.7307
LOC101749412	.	.	coiled-coil domain-containing protein 81-like	1.23733	0.240136	5.15263				SMART	SM00038:COLFI	3	0.259516	0.0437818	COL27A1, COL24A1, COL11A1	230	9	5997	8.6913	0.999815	0.415635	42.7294
ENSGALG00000045113	AADN04001067.1	AADN04001067.1:18651-19834:-1		1.65183	0.338318	4.88248
LOC107049941	.	.	platelet glycoprotein VI-like	6.66433	1.37014	4.86399				Annotation Cluster 7	Enrichment Score: 2.4162578070273577
ENSGALG00000043874	AADN04001761.1	AADN04001761.1:6415-8862:-1		6.40717	1.34768	4.75421				Category	Term	Count	%	PValue	Genes	List Total	Pop Hits	Pop Total	Fold Enrichment	Bonferroni	Benjamini	FDR
ENSGALG00000045518	AADN04003280.1	AADN04003280.1:8440-10275:+1		1.68767	0.355682	4.74488				UP_KEYWORDS	Hydroxylation	7	0.605536	0.000181532	COL9A1, COL9A2, COL9A3, C1R, C1S, COL8A1, COL10A1	428	24	11626	7.9227	0.0354833	0.00450583	0.227107
ENSGALG00000037876	AADN04001937.1	AADN04001937.1:4683-6960:+1		12.5287	2.67791	4.67853				INTERPRO	IPR008160:Collagen triple helix repeat	9	0.778547	0.000684562	COL9A1, COL9A2, COL9A3, COL27A1, COL22A1, COL24A1, COL8A1, COL11A1, COL10A1	407	54	11164	4.57166	0.428102	0.0674656	1.04837
ENSGALG00000046308	AADN04003280.1	AADN04003280.1:1798-3064:-1		3.88733	0.867636	4.48037				GOTERM_CC_DIRECT	GO:0005581~collagen trimer	5	0.432526	0.0324089	COL9A1, COL9A2, COL9A3, COL8A1, COL10A1	362	34	10057	4.08555	0.998754	0.487675	33.8964
ENSGALG00000016142	1	1:108921073-108942022:+1		2.50083	0.563364	4.43911				UP_KEYWORDS	Collagen	5	0.432526	0.0536957	COL9A1, COL9A2, COL9A3, COL8A1, COL10A1	428	39	11626	3.48251	0.999983	0.439011	49.9023
LOC107050521	.	.	leukocyte immunoglobulin-like receptor subfamily B member 1	2.45117	0.553545	4.42812
ENSGALG00000045097	AADN04002995.1	AADN04002995.1:12888-17383:-1		20.2342	4.63468	4.36582				Annotation Cluster 8	Enrichment Score: 2.3979031908884347
ENSGALG00000040822	AADN04002756.1	AADN04002756.1:10225-18817:+1		1.25567	0.292136	4.29822				Category	Term	Count	%	PValue	Genes	List Total	Pop Hits	Pop Total	Fold Enrichment	Bonferroni	Benjamini	FDR
ENSGALG00000046430	AADN04003821.1	AADN04003821.1:8647-14334:+1		27.2147	6.42573	4.23527				GOTERM_BP_DIRECT	GO:0032331~negative regulation of chondrocyte differentiation	6	0.519031	0.000164569	BMP4, CHADL, GLI2, SOX9, GREM1, IHH	341	15	8994	10.5501	0.214247	0.0470784	0.272307
C1QTNF3	.	.	C1q and tumor necrosis factor related protein 3	1.0855	0.267136	4.06347				GOTERM_BP_DIRECT	GO:0002062~chondrocyte differentiation	6	0.519031	0.00175964	BMP4, OSR1, CYTL1, SIX2, GLI2, SOX9	341	24	8994	6.59384	0.924237	0.349507	2.87576
ENSGALG00000037909	AADN04010255.1	AADN04010255.1:18-2236:+1		1.918	0.486818	3.93987				GOTERM_BP_DIRECT	GO:0042733~embryonic digit morphogenesis	4	0.346021	0.221064	BMP4, OSR1, GLI2, IHH	341	43	8994	2.45352	1	0.997977	98.4063
ENSGALG00000042211	AADN04024548.1	AADN04024548.1:21-995:-1		4.33817	1.10186	3.93712
OASL	12	12:3226395-3228407:-1	2'-5'-oligoadenylate synthetase-like	10.614	2.71868	3.9041				Annotation Cluster 9	Enrichment Score: 2.122651578290721
ENSGALG00000013575	2	2:90026993-90030445:+1		9.39767	2.54991	3.68549				Category	Term	Count	%	PValue	Genes	List Total	Pop Hits	Pop Total	Fold Enrichment	Bonferroni	Benjamini	FDR
CHIR-AB1	AADN04002388.1	AADN04002388.1:13338-15950:-1	immunoglobulin-like receptor CHIR-AB1 precursor	7.154	1.96714	3.63676				INTERPRO	IPR025741:Centrosome-associated, FAM110, C-terminal domain	3	0.259516	0.0075396	FAM110A, FAM110D, FAM110B	407	4	11164	20.5725	0.99792	0.320214	10.9947
ENSGALG00000002012	6	6:2582108-2586354:-1		2.58983	0.730455	3.54551				INTERPRO	IPR025740:FAM110	3	0.259516	0.0075396	FAM110A, FAM110D, FAM110B	407	4	11164	20.5725	0.99792	0.320214	10.9947
OMD	12	12:3414370-3416416:+1	osteomodulin	5.49167	1.5755	3.48567				INTERPRO	IPR025739:Centrosome-associated, FAM110, N-terminal domain	3	0.259516	0.0075396	FAM110A, FAM110D, FAM110B	407	4	11164	20.5725	0.99792	0.320214	10.9947
LOC107049005	.	.	coiled-coil domain-containing protein 152-like	2.0285	0.591682	3.42836
FOS	5	5:38264804-38267713:+1	Proto-oncogene c-Fos	19.6575	5.78805	3.39622				Annotation Cluster 10	Enrichment Score: 2.0738152599567403
LOC101750603	.	.	cytochrome P450 2J2-like	1.23367	0.369182	3.34162				Category	Term	Count	%	PValue	Genes	List Total	Pop Hits	Pop Total	Fold Enrichment	Bonferroni	Benjamini	FDR
LOC107049705	.	.	uncharacterized LOC107049705	11.9152	3.61345	3.29744				GOTERM_MF_DIRECT	GO:0030247~polysaccharide binding	6	0.519031	1.4827e-05	SBSPON, NRCAM, ENPP1, ENPP2, ENPP3, TINAGL1	318	10	8532	16.0981	0.0057659	0.0057659	0.0206027
ZC3H12D	3	3:48252752-48260674:-1	zinc finger CCCH-type containing 12D	1.19417	0.366364	3.25951				INTERPRO	IPR001212:Somatomedin B domain	5	0.432526	0.000107402	SBSPON, ENPP1, ENPP2, ENPP3, TINAGL1	407	8	11164	17.1437	0.083914	0.021673	0.165164
BLB1	16	16:116646-118450:+1		35.7143	11.034	3.23677				GOTERM_MF_DIRECT	GO:0005044~scavenger receptor activity	7	0.605536	0.000307602	SBSPON, ENPP1, ENPP2, ENPP3, CXCR7, LOXL2, TINAGL1	318	26	8532	7.22351	0.113065	0.0295504	0.426617
LOC425238	.	.	immunoglobulin-like receptor	1.52467	0.473591	3.21937				GOTERM_MF_DIRECT	GO:0004551~nucleotide diphosphatase activity	3	0.259516	0.00402709	ENPP1, ENPP2, ENPP3	318	3	8532	26.8302	0.79273	0.230711	5.45328
ZNF692	16	16:230728-236886:-1	zinc finger protein 692	1.055	0.333727	3.16126				GOTERM_MF_DIRECT	GO:0004528~phosphodiesterase I activity	3	0.259516	0.00402709	ENPP1, ENPP2, ENPP3	318	3	8532	26.8302	0.79273	0.230711	5.45328
ENSGALG00000046342	AADN04000971.1	AADN04000971.1:12635-13836:+1		91.9337	29.2725	3.14062				SMART	SM00201:SO	3	0.259516	0.0134514	ENPP1, ENPP2, ENPP3	230	5	5997	15.6443	0.925742	0.250921	15.5161
SKA1	.	.	spindle and kinetochore associated complex subunit 1	158.355	50.7188	3.12222				INTERPRO	IPR024873:Ectonucleotide pyrophosphatase/phosphodiesterase family	3	0.259516	0.0179571	ENPP1, ENPP2, ENPP3	407	6	11164	13.715	1	0.489364	24.3362
LOC107055704	.	.	heat shock 70 kDa protein 13-like	1.03267	0.335955	3.07383				INTERPRO	IPR020821:Extracellular Endonuclease, subunit A	3	0.259516	0.0245407	ENPP1, ENPP2, ENPP3	407	7	11164	11.7557	1	0.555587	31.7773
NELL1	5	5:2201059-2481132:+1	NEL-like 1 (chicken)	1.1785	0.393818	2.9925				INTERPRO	IPR001604:DNA/RNA non-specific endonuclease	3	0.259516	0.0245407	ENPP1, ENPP2, ENPP3	407	7	11164	11.7557	1	0.555587	31.7773
ENSGALG00000029844	AADN04001189.1	AADN04001189.1:8799-10450:+1		31.0377	10.3926	2.98651				SMART	SM00892:SM00892	3	0.259516	0.0268551	ENPP1, ENPP2, ENPP3	230	7	5997	11.1745	0.994629	0.311565	28.7462
MMRN2	.	.	multimerin 2	3.888	1.32255	2.93979				SMART	SM00477:NUC	3	0.259516	0.0268551	ENPP1, ENPP2, ENPP3	230	7	5997	11.1745	0.994629	0.311565	28.7462
ENPEP	4	4:58197816-58231230:-1	glutamyl aminopeptidase (aminopeptidase A)	1.43633	0.494273	2.90595				INTERPRO	IPR002591:Type I phosphodiesterase/nucleotide pyrophosphatase/phosphate transferase	3	0.259516	0.0319435	ENPP1, ENPP2, ENPP3	407	8	11164	10.2862	1	0.598879	39.3246
ENSGALG00000006511	10	10:12637320-12639335:+1		49.8517	17.1736	2.9028				INTERPRO	IPR017850:Alkaline-phosphatase-like, core domain	4	0.346021	0.0548988	ENPP1, ENPP2, ENPP3, ARSI	407	24	11164	4.57166	1	0.742083	58.0616
ENSGALG00000007240	4	4:9629283-9632212:-1		3.67067	1.26923	2.89205				INTERPRO	IPR017849:Alkaline phosphatase-like, alpha/beta/alpha	4	0.346021	0.0548988	ENPP1, ENPP2, ENPP3, ARSI	407	24	11164	4.57166	1	0.742083	58.0616
ENSGALG00000044771	AADN04004495.1	AADN04004495.1:5516-7292:+1		19.2087	6.65641	2.88574				GOTERM_MF_DIRECT	GO:0003676~nucleic acid binding	5	0.432526	0.973623	OSR1, ENPP1, ENPP2, ENPP3, GLI2	318	229	8532	0.585812	1	1	100
ENSGALG00000036044	5	5:278455-291212:-1		7.6525	2.66582	2.8706
ENSGALG00000036127	AADN04007026.1	AADN04007026.1:2910-5379:+1		9.7735	3.41223	2.86426
ENSGALG00000039296	AADN04003908.1	AADN04003908.1:2274-5563:+1		19.6612	6.92432	2.83944
TNFRSF19	1	1:177513346-177560920:-1	TNF receptor superfamily member 19	2.40383	0.848864	2.83183
ENSGALG00000033647	5	5:36040301-36043588:-1		1.66267	0.589227	2.82177			Up in Family H	Annotation Cluster 1	Enrichment Score: 3.4058808180211115
PCSK1	Z	Z:57130825-57158645:+1	proprotein convertase subtilisin/kexin type 1	4.3135	1.54836	2.78584				Category	Term	Count	%	PValue	Genes	List Total	Pop Hits	Pop Total	Fold Enrichment	Bonferroni	Benjamini	FDR
ENSGALG00000031101	AADN04002932.1	AADN04002932.1:12045-14308:-1		2.03267	0.73	2.78447				UP_KEYWORDS	Membrane	106	13.6422	9.48654e-05	BLB1, ADCY2, TUSC3, SYT8, FAM105A, ENPEP, JAG1, TLR7, ACBD5, GRID2, SCD5, HTR1D, GNG4, PAG1, SYK, CLRN3, TMEM206, ATRNL1, LOC107056130, IGSF6, LPAR5, RELT, CX3CR1, CD200R1L, SLC40A1, C3AR1, LOC770612, MFSD4A, ABCA1, SRC, KCNMB1, P2RY8, TTYH3, LOC421054, ADRA2A, EMB, TRAM1, LOC428335, HCN1, SPNS3, SYT10, PTPN5, MPC1, ITGA4, KCNK2, ABCG2, EPHA3, THSD7A, GPR34, TREM-B2, FAAH, ADRA1B, CHRNB2, TMPO, M…	280	3177	11626	1.38535	0.0140362	0.00704289	0.113095
LOC107056130	.	.	transmembrane protein 18-like	1.41767	0.513182	2.7625				UP_KEYWORDS	Transmembrane	96	12.3552	0.000352309	BLB1, TUSC3, ADCY2, MPEG1, SYT8, TMEM237, GJA1, FAM105A, JAG1, ENPEP, TLR7, ACBD5, CXCR4, BG2, AGPAT9, GRID2, CALN1, NIPAL1, SCD5, CHIR-B4, HTR1D, SLC1A1, LOC421584, BOC, CHIR-B6, PAG1, SLC22A2, KCNG2, CLRN3, C10ORF54, TMEM206, ATRNL1, PTGER4, MMEL1, GPR18, LOC107056130, SIGLEC15, LOC420515, TRPM1, IGSF6, CD83, LPAR5, RELT, CX3CR1, ADAM12, CD200R1L, SLC40A1, TLR2A, LOC415616, C3AR1, GPR183, HS3ST…	280	2899	11626	1.37498	0.0511489	0.0173489	0.419421
LOC100859531	.	.	butyrophilin subfamily 3 member A3-like	1.906	0.690045	2.76214				UP_KEYWORDS	Transmembrane helix	95	12.2265	0.000511876	BLB1, TUSC3, ADCY2, MPEG1, SYT8, TMEM237, GJA1, FAM105A, JAG1, ENPEP, TLR7, ACBD5, CXCR4, BG2, AGPAT9, GRID2, CALN1, NIPAL1, SCD5, CHIR-B4, HTR1D, SLC1A1, LOC421584, BOC, CHIR-B6, PAG1, SLC22A2, KCNG2, CLRN3, C10ORF54, TMEM206, ATRNL1, PTGER4, MMEL1, GPR18, LOC107056130, SIGLEC15, LOC420515, TRPM1, IGSF6, CD83, LPAR5, RELT, CX3CR1, ADAM12, CD200R1L, SLC40A1, TLR2A, LOC415616, C3AR1, GPR183, HS3ST…	280	2891	11626	1.36442	0.0734517	0.0188916	0.608853
MAMDC2	Z	Z:34882178-34946535:+1	MAM domain containing 2	7.2015	2.62164	2.74695				GOTERM_CC_DIRECT	GO:0016021~integral component of membrane	75	9.65251	0.00139085	BLB1, TUSC3, ADCY2, MPEG1, SYT8, TMEM237, GJA1, FAM105A, ENPEP, JAG1, TLR7, ACBD5, BG2, CXCR4, AGPAT9, CALN1, NIPAL1, SCD5, CHIR-B4, SLC1A1, LOC421584, CHIR-B6, KCNG2, CLRN3, TMEM206, C10ORF54, ATRNL1, MMEL1, GPR18, LOC107056130, SIGLEC15, LOC420515, TRPM1, IGSF6, CD83, LPAR5, CX3CR1, ADAM12, CD200R1L, SLC40A1, TLR2A, C3AR1, GPR183, HS3ST5, LOC770612, MFSD4A, SEC14L5, SLC47A1, GJC2, SCARF1, P2RY8…	231	2357	10057	1.38535	0.204081	0.107857	1.67353
ABAT	14	14:10116342-10141526:-1	4-aminobutyrate aminotransferase	23.369	8.54773	2.73394
BG2	.	.	intestinal zipper protein	8.17317	2.99227	2.73142				Annotation Cluster 2	Enrichment Score: 1.9202172864454141
ENSGALG00000044064	Z	Z:24931072-24960046:-1		2.17617	0.802045	2.71327				Category	Term	Count	%	PValue	Genes	List Total	Pop Hits	Pop Total	Fold Enrichment	Bonferroni	Benjamini	FDR
CHIR-B4	AADN04006143.1	AADN04006143.1:4321-6234:-1	Gallus gallus immunoglobulin-like receptor CHIR-B4 (CHIR-B4), mRNA.	4.39217	1.62045	2.71045				INTERPRO	IPR013106:Immunoglobulin V-set	10	1.287	0.000259461	IGSF6, CD83, LOC418554, TREM-B2, HAVCR1, BG2, BCAN, CD200R1L, SIGLEC15, CD28	270	88	11164	4.69865	0.144181	0.144181	0.382521
HCN1	Z	Z:14409402-14604022:-1	hyperpolarization activated cyclic nucleotide gated potassium channel 1	1.12733	0.422318	2.66939				INTERPRO	IPR007110:Immunoglobulin-like domain	18	2.3166	0.000357731	IL18R1, C10ORF54, LOC418554, BLB1, HAVCR1, BCAN, SIGLEC15, IGSF6, CD83, TREM-B2, BG2, CNTN4, EMB, CD200R1L, CHIR-B4, BOC, CHIR-B6, CD28	270	275	11164	2.70642	0.193198	0.101779	0.527043
ALDH3B1	.	.	aldehyde dehydrogenase 3 family, member B1	6.05867	2.29468	2.64031				INTERPRO	IPR003599:Immunoglobulin subtype	14	1.8018	0.00257564	LOC418554, IL18R1, C10ORF54, BCAN, SIGLEC15, CD83, TREM-B2, BG2, CNTN4, EMB, CHIR-B4, CD200R1L, BOC, CHIR-B6	270	220	11164	2.63125	0.787194	0.266168	3.7373
SMOC2	3	3:41742519-41876553:-1	SPARC related modular calcium binding 2	3.3005	1.25105	2.63819				INTERPRO	IPR013783:Immunoglobulin-like fold	20	2.574	0.00351965	IL18R1, C10ORF54, LOC418554, BLB1, HAVCR1, BCAN, MID1, SIGLEC15, EPHA3, IGSF6, CD83, TREM-B2, BG2, CNTN4, EMB, CD200R1L, CHIR-B4, BOC, CHIR-B6, CD28	270	397	11164	2.08303	0.879429	0.297132	5.07417
SAMD9L	.	.	sterile alpha motif domain containing 9-like	1.49733	0.567864	2.63678				SMART	SM00409:IG	14	1.8018	0.00731777	LOC418554, IL18R1, C10ORF54, BCAN, SIGLEC15, CD83, TREM-B2, BG2, CNTN4, EMB, CHIR-B4, CD200R1L, BOC, CHIR-B6	166	220	5997	2.29896	0.697956	0.697956	8.51247
ENSGALG00000046116	AADN04002340.1	AADN04002340.1:11253-12412:+1		2.12483	0.809091	2.6262				INTERPRO	IPR003598:Immunoglobulin subtype 2	6	0.772201	0.262337	CNTN4, EMB, CD200R1L, CHIR-B4, BOC, SIGLEC15	270	143	11164	1.73489	1	0.995343	98.8822
ENSGALG00000030920	24	24:5109261-5109973:+1		1.31667	0.501545	2.62522				SMART	SM00408:IGc2	6	0.772201	0.357937	CNTN4, EMB, CD200R1L, CHIR-B4, BOC, SIGLEC15	166	143	5997	1.5158	1	0.985711	99.5332
ENSGALG00000042833	26	26:139302-149917:+1		3.8315	1.46327	2.61845				INTERPRO	IPR013098:Immunoglobulin I-set	3	0.3861	0.751975	CNTN4, BOC, SIGLEC15	270	111	11164	1.11752	1	0.999999	100
LOC429098	.	.	fatty-acid amide hydrolase 1-like	1.4205	0.543273	2.61471
ENSGALG00000026974	1	1:56374719-56374886:-1		1.07417	0.413727	2.59632				Annotation Cluster 3	Enrichment Score: 1.776022865519768
ENSGALG00000031574	AADN04006046.1	AADN04006046.1:7243-9931:-1		1.2535	0.482864	2.59597				Category	Term	Count	%	PValue	Genes	List Total	Pop Hits	Pop Total	Fold Enrichment	Bonferroni	Benjamini	FDR
LOC107050585	.	.	serine/arginine repetitive matrix protein 3-like	9.13567	3.51986	2.59546				UP_KEYWORDS	Receptor	25	3.2175	0.00400112	GPR183, C3AR1, TLR7, P2RY8, CXCR4, ADRA2A, GRID2, HTR1D, LTK, PTGER4, OPRL1, GPR18, ITGA4, NR4A3, PTGFR, AHR, EPHA3, TREM-B2, GPR34, LPAR5, CX3CR1, ADRA1B, CHRNB2, CD200R1L, TLR2A	280	557	11626	1.86362	0.449739	0.0817977	4.66951
LOC107057054	.	.	caspase recruitment domain-containing protein 11-like	2.58217	1.00055	2.58076				INTERPRO	IPR000276:G protein-coupled receptor, rhodopsin-like	15	1.9305	0.00479169	GPR183, C3AR1, PTGER4, OPRL1, GPR18, PTGFR, P2RY8, GPR34, LPAR5, CXCR4, CX3CR1, ADRA1B, ADRA2A, HTR1D, LOC415616	270	264	11164	2.34933	0.943973	0.337479	6.8482
ENSGALG00000044411	AADN04002981.1	AADN04002981.1:13675-15126:-1		4.93133	1.91955	2.56901				INTERPRO	IPR017452:GPCR, rhodopsin-like, 7TM	15	1.9305	0.00584427	GPR183, C3AR1, PTGER4, OPRL1, GPR18, PTGFR, P2RY8, GPR34, LPAR5, CXCR4, CX3CR1, ADRA1B, ADRA2A, HTR1D, LOC415616	270	270	11164	2.29712	0.970307	0.35571	8.29274
ENSGALG00000041031	16	16:28376-52195:+1		1.42467	0.559773	2.54508				UP_KEYWORDS	Transducer	15	1.9305	0.0114791	GPR183, C3AR1, PTGER4, OPRL1, GPR18, P2RY8, GPR34, LPAR5, CXCR4, CX3CR1, ADRA1B, ADRA2A, HTR1D, GNG4, PLCB2	280	294	11626	2.11844	0.820983	0.193486	12.8651
KYNU	.	.	kynureninase	5.37883	2.11668	2.54116				UP_KEYWORDS	G-protein coupled receptor	13	1.6731	0.0271822	P2RY8, GPR183, C3AR1, GPR34, LPAR5, PTGER4, CXCR4, GPR18, OPRL1, CX3CR1, ADRA1B, ADRA2A, HTR1D	280	266	11626	2.02924	0.98353	0.311536	28.0151
SMYD1	4	4:86507298-86529540:+1	SET and MYND domain containing 1	1.03583	0.408455	2.53598				KEGG_PATHWAY	gga04080:Neuroactive ligand-receptor interaction	10	1.287	0.0620098	P2RY8, C3AR1, PTGER4, OPRL1, ADRA1B, GRID2, ADRA2A, CHRNB2, HTR1D, PTGFR	84	262	4324	1.96474	0.995074	0.587513	49.6174
MPP7	.	.	membrane protein, palmitoylated 7 (MAGUK p55 subfamily member 7)	4.96183	1.964	2.52639				GOTERM_MF_DIRECT	GO:0004930~G-protein coupled receptor activity	7	0.900901	0.170524	P2RY8, GPR183, C3AR1, GPR34, LPAR5, GPR18, LOC415616	200	160	8532	1.86637	1	0.996099	91.4045
ENSGALG00000045085	6	6:19356961-19360731:+1		31.8505	12.6156	2.52468
IFIT5	.	.	interferon-induced protein with tetratricopeptide repeats 5	31.8505	12.6156	2.52468				Annotation Cluster 4	Enrichment Score: 1.531241831043894
GPR141	2	2:46412221-46429402:-1	G protein-coupled receptor 141	9.81983	3.89823	2.51905				Category	Term	Count	%	PValue	Genes	List Total	Pop Hits	Pop Total	Fold Enrichment	Bonferroni	Benjamini	FDR
TNNT3	5	5:14010254-14044529:-1	troponin T type 3 (skeletal, fast)	4.67667	1.86127	2.51262				GOTERM_CC_DIRECT	GO:0005578~proteinaceous extracellular matrix	10	1.287	0.00293341	ASPN, OMD, WNT5B, CRISPLD2, LUM, CCBE1, BCAN, POSTN, SPON2, SLIT2	231	130	10057	3.34898	0.382321	0.148363	3.49952
ENSGALG00000025881	1	1:51576859-51607306:-1		1.21783	0.487955	2.49579				INTERPRO	IPR003591:Leucine-rich repeat, typical subtype	9	1.1583	0.0116646	ASPN, OMD, LUM, LRRTM2, LRRC17, TLR7, TLR2A, CD180, SLIT2	270	127	11164	2.93018	0.999124	0.505393	15.9107
SVOPL	1	1:56415234-56432260:+1	SVOP like	1.58	0.634318	2.49086				GOTERM_MF_DIRECT	GO:0004872~receptor activity	6	0.772201	0.0118605	TNFRSF19, CD200R1L, TLR7, SLC40A1, TLR2A, CD180	200	59	8532	4.33831	0.95865	0.796652	14.4957
ENSGALG00000037468	AADN04004861.1	AADN04004861.1:8479-13962:-1		2.79767	1.12382	2.48943				UP_KEYWORDS	Leucine-rich repeat	8	1.0296	0.0125071	ASPN, OMD, LUM, LRRC17, TLR7, TLR2A, CD180, SLIT2	280	104	11626	3.19396	0.846691	0.188091	13.9398
ENSGALG00000044011	4	4:77588020-77589735:-1		13.5018	5.52495	2.44379				SMART	SM00369:LRR_TYP	9	1.1583	0.0233047	ASPN, OMD, LUM, LRRTM2, LRRC17, TLR7, TLR2A, CD180, SLIT2	166	127	5997	2.56015	0.978584	0.617455	24.8464
ENSGALG00000038590	AADN04006105.1	AADN04006105.1:2186-8743:+1		2.177	0.891136	2.44295				INTERPRO	IPR001611:Leucine-rich repeat	9	1.1583	0.0490447	ASPN, OMD, LUM, LRRTM2, LRRC17, TLR7, TLR2A, CD180, SLIT2	270	167	11164	2.22834	1	0.848294	52.4182
ASPN	12	12:3382143-3397878:+1	asporin	15.8645	6.52577	2.43105				INTERPRO	IPR000483:Cysteine-rich flanking region, C-terminal	5	0.643501	0.0620578	LRRC17, TLR7, TLR2A, CD180, SLIT2	270	62	11164	3.33453	1	0.895773	61.1794
ENSGALG00000023237	10	10:20102278-20102977:-1		1.565	0.6465	2.42073				INTERPRO	IPR000372:Leucine-rich repeat-containing N-terminal	4	0.514801	0.0629038	ASPN, OMD, LUM, SLIT2	270	38	11164	4.35244	1	0.885324	61.6934
PTPRVP	.	.	protein tyrosine phosphatase, receptor type, V, pseudogene	11.5792	4.79982	2.41242				GOTERM_BP_DIRECT	GO:0002224~toll-like receptor signaling pathway	3	0.3861	0.0817948	TLR7, TLR2A, CD180	206	21	8994	6.23717	1	0.969263	74.2937
ENSGALG00000036168	AADN04017065.1	AADN04017065.1:291-2117:-1		7.9425	3.30155	2.40569				SMART	SM00013:LRRNT	4	0.514801	0.0856789	ASPN, OMD, LUM, SLIT2	166	38	5997	3.80279	1	0.87579	66.2105
ENSGALG00000044373	AADN04000790.1	AADN04000790.1:44438-45322:+1		1.929	0.802955	2.40238				SMART	SM00082:LRRCT	5	0.643501	0.090309	LRRC17, TLR7, TLR2A, CD180, SLIT2	166	62	5997	2.91343	1	0.854634	68.2258
ENSGALG00000046529	Z	Z:76431882-76432814:+1		1.497	0.623182	2.40219
ENSGALG00000044303	AADN04013946.1	AADN04013946.1:304-1400:+1		56.1825	23.4065	2.4003				Annotation Cluster 5	Enrichment Score: 1.5190069137499715
LOC107057051	.	.	protein kinase C beta type-like	2.11117	0.882273	2.39287				Category	Term	Count	%	PValue	Genes	List Total	Pop Hits	Pop Total	Fold Enrichment	Bonferroni	Benjamini	FDR
ENSGALG00000035433	AADN04010835.1	AADN04010835.1:3206-5473:+1		11.4392	4.79818	2.38406				UP_KEYWORDS	EGF-like domain	10	1.287	0.00129904	ATRNL1, EGFL6, EPGN, NELL1, CCBE1, PAMR1, BCAN, JAG1, THBS2, SLIT2	280	110	11626	3.77468	0.176081	0.037996	1.53853
HTR1D	23	23:1671071-1672207:+1	5-hydroxytryptamine receptor 1D	1.161	0.488591	2.37622				INTERPRO	IPR000742:Epidermal growth factor-like domain	12	1.5444	0.0015283	ATRNL1, EGFL6, EPGN, NELL1, CCBE1, PAMR1, BCAN, JAG1, ADAM12, THBS2, SLIT2, SCARF1	270	158	11164	3.14037	0.600556	0.263535	2.23359
LOC100859134	.	.	class I histocompatibility antigen, F10 alpha chain-like	3.79667	1.60318	2.36821				INTERPRO	IPR013032:EGF-like, conserved site	11	1.4157	0.00194326	ATRNL1, EGFL6, EPGN, NELL1, CCBE1, PAMR1, BCAN, JAG1, THBS2, SLIT2, SCARF1	270	139	11164	3.27216	0.688729	0.253062	2.83197
ENSGALG00000041342	AADN04002022.1	AADN04002022.1:2190-3441:-1		9.16067	3.87768	2.36241				SMART	SM00181:EGF	10	1.287	0.00843651	ATRNL1, EGFL6, NELL1, CCBE1, PAMR1, BCAN, JAG1, THBS2, SLIT2, SCARF1	166	128	5997	2.82238	0.748669	0.498671	9.7536
ENSGALG00000035929	AADN04000843.1	AADN04000843.1:31762-31992:+1		10.3172	4.39618	2.34685				INTERPRO	IPR001881:EGF-like calcium-binding	7	0.900901	0.0165744	EGFL6, NELL1, CCBE1, PAMR1, JAG1, THBS2, SLIT2	270	85	11164	3.40514	0.999956	0.566414	21.8737
ENSGALG00000040531	AADN04000843.1	AADN04000843.1:25130-26410:+1		10.3172	4.39618	2.34685				INTERPRO	IPR013320:Concanavalin A-like lectin/glucanase, subgroup	8	1.0296	0.0229361	LTK, MAMDC2, EGFL6, NELL1, LGALS2, MID1, THBS2, SLIT2	270	117	11164	2.82722	0.999999	0.657307	29.0145
ENSGALG00000041221	AADN04000843.1	AADN04000843.1:36860-37655:+1		10.3172	4.39618	2.34685				SMART	SM00179:EGF_CA	7	0.900901	0.0290057	EGFL6, NELL1, CCBE1, PAMR1, JAG1, THBS2, SLIT2	166	85	5997	2.97512	0.991753	0.616943	29.9911
ATRNL1	6	6:28169763-28585657:+1	attractin-like 1	8.13983	3.46882	2.34657				GOTERM_MF_DIRECT	GO:0005509~calcium ion binding	16	2.0592	0.054863	ASPN, PLA2G10, EGFL6, SYT10, NELL1, PAMR1, SYT8, JAG1, MYL12A, SLIT2, SMOC2, ANXA8, CCBE1, CALN1, THBS2, PLCB2	200	409	8532	1.66885	1	0.976865	52.3173
PARVG	1	1:69243499-69258876:+1	parvin, gamma	6.67533	2.84591	2.34559				INTERPRO	IPR018097:EGF-like calcium-binding, conserved site	5	0.643501	0.0882008	EGFL6, NELL1, CCBE1, JAG1, SLIT2	270	70	11164	2.95344	1	0.937342	74.4294
ENSGALG00000008963	2	2:20856555-20872259:+1		1.9805	0.8455	2.3424				INTERPRO	IPR000152:EGF-type aspartate/asparagine hydroxylation site	5	0.643501	0.0991781	EGFL6, NELL1, CCBE1, JAG1, SLIT2	270	73	11164	2.83206	1	0.942073	78.6178
KIAA0513	11	11:17983472-17988943:-1	KIAA0513	8.8315	3.77418	2.33998				INTERPRO	IPR001007:von Willebrand factor, type C	3	0.3861	0.162428	NELL1, JAG1, THBS2	270	30	11164	4.13481	1	0.977588	92.7038
ANGPTL4	28	28:838935-846067:-1	angiopoietin like 4	10.2292	4.37605	2.33754				SMART	SM00214:VWC	3	0.3861	0.179206	NELL1, JAG1, THBS2	166	28	5997	3.8707	1	0.899668	90.8567
LOC107055444	.	.	activated RNA polymerase II transcriptional coactivator p15-like	1.21283	0.522545	2.32101				INTERPRO	IPR001791:Laminin G domain	3	0.3861	0.277672	NELL1, THBS2, SLIT2	270	43	11164	2.88475	1	0.995578	99.1804
ENSGALG00000040422	Z	Z:42080856-42081143:+1		1.60483	0.693682	2.3135				INTERPRO	IPR009030:Insulin-like growth factor binding protein, N-terminal	4	0.514801	0.389244	EGFL6, NELL1, JAG1, SCARF1	270	93	11164	1.77841	1	0.999127	99.9312
LOC107057048	.	.	integrin alpha-X-like	1.25567	0.543182	2.31169
CMPK2	.	.	cytidine monophosphate (UMP-CMP) kinase 2, mitochondrial	2.89833	1.25673	2.30625				Annotation Cluster 6	Enrichment Score: 1.5031362805705626
ENSGALG00000028982	3	3:95396266-95400963:-1		2.89833	1.25673	2.30625				Category	Term	Count	%	PValue	Genes	List Total	Pop Hits	Pop Total	Fold Enrichment	Bonferroni	Benjamini	FDR
ENSGALG00000017249	1	1:189174545-189193836:+1		2.7775	1.20459	2.30576				INTERPRO	IPR013320:Concanavalin A-like lectin/glucanase, subgroup	8	1.0296	0.0229361	LTK, MAMDC2, EGFL6, NELL1, LGALS2, MID1, THBS2, SLIT2	270	117	11164	2.82722	0.999999	0.657307	29.0145
ENSGALG00000031456	5	5:24977292-24994712:+1		2.3555	1.02323	2.30203				INTERPRO	IPR000998:MAM domain	3	0.3861	0.0325568	LTK, MAMDC2, EGFL6	270	12	11164	10.337	1	0.757925	38.6663
FAM46D	4	4:9523861-9525036:-1	family with sequence similarity 46 member D	1.8155	0.791818	2.29282				SMART	SM00137:MAM	3	0.3861	0.0414409	LTK, MAMDC2, EGFL6	166	12	5997	9.03163	0.998991	0.683301	40.1111
KCNMB1	13	13:3783482-3790486:+1	potassium calcium-activated channel subfamily M regulatory beta subunit 1	76.3212	33.2923	2.29246
ENSGALG00000041621	2	2:148464758-148470888:-1		1045.33	456.269	2.29103				Annotation Cluster 7	Enrichment Score: 1.48807111678822
LOC107049335	.	.	probable ATP-dependent RNA helicase DDX4	1.45817	0.637182	2.28846				Category	Term	Count	%	PValue	Genes	List Total	Pop Hits	Pop Total	Fold Enrichment	Bonferroni	Benjamini	FDR
ABCG2	6	6:17548027-17561317:+1	ATP binding cassette subfamily G member 2 (Junior blood group)	18.0508	7.90855	2.28245				UP_KEYWORDS	Immunity	5	0.643501	0.0150568	LY86, TLR7, TLR2A, SRC, SYK	280	40	11626	5.19018	0.895704	0.202323	16.5532
TUSC3	4	4:64033623-64145672:-1	tumor suppressor candidate 3	7.6475	3.353	2.28079				UP_KEYWORDS	Innate immunity	4	0.514801	0.0287724	LY86, TLR7, TLR2A, SYK	280	28	11626	5.93163	0.987093	0.304064	29.4061
LOC431003	.	.	E3 ubiquitin-protein ligase KCMF1-like	4.18667	1.83573	2.28066				GOTERM_BP_DIRECT	GO:0045087~innate immune response	7	0.900901	0.0288216	BPI, LY86, SPON2, TLR7, TLR2A, SRC, SYK	206	102	8994	2.99629	1	0.873638	37.2211
LIMD2	27	27:2950471-2960895:-1	LIM domain containing 2	5.0995	2.24309	2.27343				UP_KEYWORDS	Inflammatory response	3	0.3861	0.0893903	LY86, TLR7, TLR2A	280	21	11626	5.93163	0.999999	0.63087
POSTN	1	1:171990657-172022731:+1	periostin, osteoblast specific factor	143.246	63.0277	2.27274
GHRL	12	12:19487356-19490057:-1	ghrelin and obestatin prepropeptide	1.48117	0.654136	2.26431
LOC101751764	.	.	GTPase IMAP family member 8-like	2.34667	1.03791	2.26096
ENSGALG00000030320	16	16:398725-481487:-1		1.59767	0.707182	2.2592			GATHER analysis
LOC107056599	.	.	kynureninase-like	3.14517	1.39268	2.25835			Down in Family H	Annotation	Total Genes With Ann	Your Genes (With Ann)	Your Genes (No Ann)	Genome (With Ann)	Genome (No Ann)	ln(Bayes factor)	neg ln(p value)	FE: neg ln(p value)	FE: neg ln(FDR)	Genes
LOC107049124	.	.	class I histocompatibility antigen, F10 alpha chain-like	1.23383	0.548364	2.25003				GO:0007275 [2]: development	105	105	219	1682	10273	31.12	11.17	36.48	29.94	ABLIM1 ADAMTSL3 ANPEP ATP10A B3GNT5 BMP4 BMP6 BMP8B C20orf10 CD9 CHAD CLEC3A COL10A1 COL11A1 COL9A1 COL9A2 COMP CPM CSF3 CTNNBIP1 CTNND2 CYP1B1 DCBLD2 DMD EGR2 ENC1 ESR1 EVA1 EXTL1 FADS1 FEZ1 FGFRL1 FRZB FST FZD9 GJB1 GLI2 GPC4 GPX4 GREM1 GSC HAND2 HEY1 HLF HOXD8 HOXD9 HUNK IBSP ID1 IGFBP2 IGFBP7 IHH IL4 IL6R ITGA7 LAMA4 LAMA5 LIF LMNA LOXL2 MATN1 MDFI MEF2B MGP MINPP1 MYL1 NOS2A NPAS2 NPR3 NRCAM…
ENSGALG00000006436	9	9:4624346-4626196:-1		1.25967	0.561227	2.24449				GO:0009653 [3]: morphogenesis	77	77	247	1073	10882	27.22	11.17	32.61	26.76	ABLIM1 ANPEP ATP10A B3GNT5 BMP4 BMP6 BMP8B C20orf10 CD9 CHAD CLEC3A COL10A1 COL11A1 COL9A1 COL9A2 COMP CPM CYP1B1 DCBLD2 DMD EGR2 ENC1 ESR1 EVA1 EXTL1 FEZ1 FGFRL1 FRZB FZD9 GJB1 GLI2 GPC4 GREM1 HAND2 HEY1 IBSP IGFBP2 IGFBP7 IL4 ITGA7 LMNA MATN1 MEF2B MGP MINPP1 MYL1 NOS2A NPAS2 NPR3 NRCAM PALM PALM2 PAPSS2 PCP4 PHGDH POU4F1 PROK2 RERG S100B SEMA3A SEMA3B SEMA4D SEMA5B SEMA7A SERPINI1 SGCA SGCG SI…
ENSGALG00000032897	AADN04001080.1	AADN04001080.1:9545-12154:+1		2.57333	1.14818	2.24122				GO:0009887 [4]: organogenesis	60	60	264	864	11091	18.47	11.17	23.82	18.67	ABLIM1 ANPEP B3GNT5 BMP4 BMP6 BMP8B CD9 CLEC3A COL10A1 COL11A1 COL9A1 COL9A2 COMP CYP1B1 DMD EGR2 ENC1 EXTL1 FEZ1 FRZB FZD9 GJB1 GLI2 GREM1 HAND2 HEY1 IBSP IL4 ITGA7 LMNA MATN1 MEF2B MGP MINPP1 MYL1 NOS2A NPAS2 NPR3 NRCAM PAPSS2 PCP4 PHGDH POU4F1 PROK2 S100B SEMA3A SEMA3B SEMA4D SEMA5B SEMA7A SERPINI1 SGCA SGCG SNCA SOX6 SOX8 SOX9 THBS1 TNFRSF11B ZBTB16
ENSGALG00000029151	10	10:2537062-2540128:-1		8.764	3.92264	2.23421				GO:0048513 [3]: organ development	60	60	264	864	11091	18.47	11.17	23.82	18.67	ABLIM1 ANPEP B3GNT5 BMP4 BMP6 BMP8B CD9 CLEC3A COL10A1 COL11A1 COL9A1 COL9A2 COMP CYP1B1 DMD EGR2 ENC1 EXTL1 FEZ1 FRZB FZD9 GJB1 GLI2 GREM1 HAND2 HEY1 IBSP IL4 ITGA7 LMNA MATN1 MEF2B MGP MINPP1 MYL1 NOS2A NPAS2 NPR3 NRCAM PAPSS2 PCP4 PHGDH POU4F1 PROK2 S100B SEMA3A SEMA3B SEMA4D SEMA5B SEMA7A SERPINI1 SGCA SGCG SNCA SOX6 SOX8 SOX9 THBS1 TNFRSF11B ZBTB16
PLTP	20	20:10734286-10737049:-1	phospholipid transfer protein	620.484	278.519	2.2278				GO:0001501 [5]: skeletal development	18	18	306	103	11852	14.16	11.17	19.76	14.83	BMP4 BMP6 BMP8B CLEC3A COL10A1 COL11A1 COL9A2 COMP EXTL1 FRZB IBSP MATN1 MGP MINPP1 NPR3 PAPSS2 SOX9 TNFRSF11B
FGFBP2	4	4:77137751-77139658:+1	fibroblast growth factor binding protein 2	4.51367	2.03545	2.21752				GO:0007155 [4]: cell adhesion	40	40	284	542	11413	12.14	11.17	17.5	12.76	ADAMDEC1 ARHGDIG CCL5 CD72 CD9 CDH1 CDH19 CDH3 CDH7 CEECAM1 CHL1 COL11A1 COL15A1 COL24A1 COL27A1 COL8A1 COMP CTNNA2 CTNND2 DCBLD2 EPDR1 EVA1 FEZ1 HAPLN1 HAPLN3 HSPG2 IBSP ITGA7 LAMA4 LAMA5 LOXL2 NLGN3 NRCAM PDZK3 RELN SEMA4D TGM2 THBS1 TNFAIP6 WISP2
GRIP2	12	12:11033189-11140725:-1	glutamate receptor interacting protein 2	1.8565	0.837909	2.21563				GO:0006139 [5]: nucleobase, nucleoside, nucleotide and nucleic acid metabolism	41	41	283	2926	9029	10.73	11.17	0	0	AK5 COL24A1 CTNNBIP1 DDIT3 EGR2 ENPP1 ENPP2 ENPP3 ESR1 FADS1 GLI2 GSC H2AFY2 HAND2 HEY1 HLF HOXD8 HOXD9 ID1 ID4 IRF1 IRX3 IRX5 IRX6 LDHD MEF2B NPAS2 PAPSS2 POU4F1 PTGER3 SIX2 SOX5 SOX6 SOX8 SOX9 SPDEF STRBP TAF4B TAL2 UGP2 ZBTB16
LOC107056755	.	.	phosphatidylinositol 3,4,5-trisphosphate 5-phosphatase 1-like	1.1125	0.502591	2.21353				GO:0044238 [4]: primary metabolism	121	121	203	6165	5790	10.2	11.17	0	0	A4GALT ACACB ADAMDEC1 ADAMTS14 ADAMTS6 AK5 ALDH18A1 ALDOB ANPEP B3GNT5 B3GNT7 BBOX1 C1R C1S CAMKK1 CAPN5 CAPN6 CDO1 CEECAM1 COL24A1 CPM CTNNBIP1 DDIT3 DDO DGAT2 DHDH DHRS3 DPEP1 DPP10 DUSP15 EGR2 ENPP1 ENPP2 ENPP3 ESR1 F13A1 FADS1 FBXL2 GAL3ST1 GCH1 GFPT2 GLI2 GLUL GM2A GPX4 GSC GYG2 H2AFY2 HAND2 HECW2 HEY1 HLF HOXD8 HOXD9 HPGD HSPB8 HUNK ID1 ID4 IHH IL4 IRF1 IRX3 IRX5 IRX6 ITIH5 LDHD LIN7A LIPG …
MFSD4	.	.	major facilitator superfamily domain containing 4	16.043	7.24964	2.21294				GO:0008152 [3]: metabolism	145	145	179	6820	5135	6.95	10.07	0	0	A4GALT ACACB ADAMDEC1 ADAMTS14 ADAMTS6 AK5 ALDH18A1 ALDH1L2 ALDH9A1 ALDOB ANPEP AOX1 ATP2B2 ATP9A B3GNT5 B3GNT7 BBOX1 C1R C1S CA12 CA14 CAMKK1 CAPN5 CAPN6 CCL5 CDO1 CEECAM1 COL24A1 CPM CTNNBIP1 CYBRD1 CYP1B1 CYP27A1 DDIT3 DDO DGAT2 DHDH DHRS3 DPEP1 DPP10 DUSP15 EGR2 ENPP1 ENPP2 ENPP3 EPHX1 ESR1 F13A1 FADS1 FBXL2 GAL3ST1 GCH1 GFPT2 GLI2 GLUL GM2A GPR56 GPT2 GPX4 GSC GYG2 H2AFY2 HAND2 HECW2 HEY1 HL…
MFSD4A	26	26:2177659-2191981:+1	major facilitator superfamily domain containing 4A	16.043	7.24964	2.21294				GO:0040007 [3]: growth	15	15	309	139	11816	5.71	8.97	11.21	6.67	BMP4 BMP6 BMP8B C20orf10 CHAD DCBLD2 ESR1 FGFRL1 IGFBP2 IGFBP7 LAMA4 LAMA5 RERG SOCS3 WISP2
ENSGALG00000045304	26	26:2568738-2569802:-1		1.16967	0.528909	2.21147				GO:0050793 [3]: regulation of development	15	15	309	140	11815	5.63	8.97	11.13	6.67	C20orf10 CHAD DCBLD2 FADS1 FGFRL1 IGFBP2 IGFBP7 LAMA4 LAMA5 NOS2A NRCAM RERG S100B SOCS3 WISP2
RELT	.	.	RELT tumor necrosis factor receptor	1.19133	0.538864	2.21083				GO:0043283 [4]: biopolymer metabolism	20	20	304	1591	10364	5.12	8.53	0	0	ADAMDEC1 ADAMTS14 ADAMTS6 ANPEP C1R C1S CAPN5 CAPN6 CEECAM1 CPM DPEP1 DPP10 GYG2 H2AFY2 IHH MEP1A MME MMP9 SOX6 ST14
ENSGALG00000042862	AADN04003982.1	AADN04003982.1:14060-14428:-1		6.84867	3.09909	2.2099				GO:0006817 [8]: phosphate transport	11	11	313	79	11876	5.08	8.53	10.65	6.31	COL10A1 COL11A1 COL15A1 COL22A1 COL24A1 COL27A1 COL8A1 COL9A1 COL9A2 COL9A3 EMID1
ENSGALG00000037828	19	19:6860109-6868039:-1		3.67433	1.67027	2.19984				GO:0015698 [7]: inorganic anion transport	14	14	310	131	11824	4.95	8.53	10.45	6.25	COL10A1 COL11A1 COL15A1 COL22A1 COL24A1 COL27A1 COL8A1 COL9A1 COL9A2 COL9A3 EMID1 GABRA4 SLC12A2 SLC12A5
LOC107057441	.	.	amyloid-like protein 2	3.1975	1.45391	2.19924				GO:0044237 [4]: cellular metabolism	139	139	185	6426	5529	4.79	8.4	0	0	A4GALT ACACB ADAMDEC1 ADAMTS14 ADAMTS6 AK5 ALDH18A1 ALDH1L2 ALDH9A1 ALDOB ANPEP AOX1 B3GNT5 B3GNT7 BBOX1 C1R C1S CA12 CA14 CAMKK1 CAPN5 CAPN6 CCL5 CDO1 CEECAM1 COL24A1 CPM CTNNBIP1 CYBRD1 CYP1B1 CYP27A1 DDIT3 DDO DGAT2 DHDH DHRS3 DPEP1 DPP10 DUSP15 EGR2 ENPP1 ENPP2 ENPP3 EPHX1 ESR1 F13A1 FADS1 FBXL2 GAL3ST1 GCH1 GFPT2 GLI2 GLUL GM2A GPX4 GSC GYG2 H2AFY2 HAND2 HECW2 HEY1 HLF HOXD8 HOXD9 HPGD HSPB8…
ENSGALG00000029089	20	20:5259450-5262380:+1		32.3988	14.7515	2.1963				GO:0001502 [7]: cartilage condensation	4	4	320	4	11951	4.66	8.4	10.39	6.25	COL11A1 MATN1 MGP SOX9
ENSGALG00000007003	17	17:4069259-4077367:+1		1.28017	0.584273	2.19104				GO:0006259 [5]: DNA metabolism	2	2	322	536	11419	4.21	8.12	0	0	H2AFY2 SOX6
LOC107056261	.	.	olfactory receptor 14C36-like	1.93083	0.885636	2.18016				GO:0051216 [6]: cartilage development	4	4	320	5	11950	4.1	7.91	9.83	5.77	COL11A1 MATN1 MGP SOX9
P2RY8	1	1:129127235-129153159:+1	purinergic receptor P2Y8	27.0267	12.4398	2.17259				GO:0040008 [4]: regulation of growth	11	11	313	92	11863	3.86	7.45	9.39	5.42	C20orf10 CHAD DCBLD2 FGFRL1 IGFBP2 IGFBP7 LAMA4 LAMA5 RERG SOCS3 WISP2
LOC107057014	.	.	cyclin-F-like	2.57217	1.18582	2.16911				GO:0000902 [4]: cellular morphogenesis	14	14	310	148	11807	3.77	7.34	9.23	5.33	ATP10A C20orf10 CHAD DCBLD2 ESR1 FGFRL1 IGFBP2 IGFBP7 ITGA7 PALM PALM2 RERG SOCS3 WISP2
ENSGALG00000034702	Z	Z:41967260-41974126:+1		1.97633	0.912818	2.16509				GO:0006865 [6]: amino acid transport	8	8	316	49	11906	3.46	6.93	9.07	5.24	SLC12A2 SLC12A5 SLC1A2 SLC1A6 SLC38A3 SLC6A13 SLC7A1 SLC7A11
LRRTM2	13	13:2640113-2642017:+1	leucine rich repeat transmembrane neuronal 2	1.53433	0.718955	2.13412				GO:0007399 [5]: neurogenesis	24	24	300	379	11576	3.38	6.85	8.66	4.89	B3GNT5 CD9 EGR2 ENC1 FEZ1 FZD9 GJB1 GREM1 HEY1 NPAS2 NRCAM PCP4 PHGDH POU4F1 S100B SEMA3A SEMA3B SEMA4D SEMA5B SEMA7A SERPINI1 SNCA SOX8 THBS1
IL6	2	2:30949385-30952079:+1	interleukin 6	3.4585	1.62641	2.12646				GO:0007267 [4]: cell-cell signaling	29	29	295	509	11446	3.27	6.73	8.47	4.82	CCL20 CCL5 CSF3 FADS1 FST GABRA4 GCH1 GJB1 GLUL GRIN3A HTR1E HTR7 IHH IL1B LIF MME NQO1 PDGFA PRIMA1 SEMA3B SLC1A2 SLC1A6 SLC6A2 SSTR2 STC2 TNFAIP6 WISP2 WNT16 WNT4
EGR1	13	13:18348955-18351756:+1	early growth response 1	73.857	34.7755	2.12382				GO:0006820 [6]: anion transport	14	14	310	160	11795	3.04	6.49	8.47	4.82	COL10A1 COL11A1 COL15A1 COL22A1 COL24A1 COL27A1 COL8A1 COL9A1 COL9A2 COL9A3 EMID1 GABRA4 SLC12A2 SLC12A5
LOC100858168	.	.	natural cytotoxicity triggering receptor 1-like	6.6385	3.13145	2.11994				GO:0019222 [4]: regulation of metabolism	32	32	292	2006	9949	3	6.43	0	0	CTNNBIP1 DDIT3 EGR2 ESR1 FADS1 GLI2 GSC HAND2 HEY1 HLF HOXD8 HOXD9 ID1 ID4 IRF1 IRX3 IRX5 IRX6 MEF2B NPAS2 POU4F1 S100B SIX2 SOX5 SOX6 SOX8 SOX9 SPDEF STRBP TAF4B TAL2 ZBTB16
ENSGALG00000040780	W	W:192483-241426:-1	ubiquitin-associated protein 2	4.15433	1.96318	2.11612
ADRA2A	6	6:26252415-26253698:+1	adrenoceptor alpha 2A	1.16767	0.551955	2.11551			Up in Family H	Annotation	Total Genes With Ann	Your Genes (With Ann)	Your Genes (No Ann)	Genome (With Ann)	Genome (No Ann)	ln(Bayes factor)	neg ln(p value)	FE: neg ln(p value)	FE: neg ln(FDR)	Genes
IL18R1	1	1:133975526-133993302:+1	interleukin 18 receptor 1	7.928	3.77759	2.09869				GO:0007154 [3]: cell communication	191	83	85	3392	8719	14.54	9.44	19.16	12.25	ABAT ADAM12 ADAMTS1 ADCY2 ADRA1B ADRA2A AHR ANGPT1 ANGPTL4 ARHGAP20 ASB9 BCAN C3 C3AR1 CALCA CD28 CD83 CHRNB2 CNTN4 CREB1 CX3CR1 CXCR4 DAPP1 ENPEP EPHA3 FGF10 FKBP1A GCHFR GHRL GJA1 GLI3 GNG4 GPR141 GPR18 GPR34 GRID2 HAVCR1 HTR1D ICOSLG IGSF6 IL18R1 IL6 IL8 INPP5D ITGA4 JAG1 KCNMB1 KSR LTK LY86 LY96 NCF4 NELL1 NOXO1 OMD OPRL1 P2RY8 PARVG PCSK1 PLA2G4B PLCB2 POSTN PTGER4 PTGFR PTPN6 RALGPS1 RASD2 …
C8orf22	2	2:108833160-108835660:+1	chromosome 2 open reading frame, human C8orf22	1.06083	0.505864	2.09707				GO:0009653 [3]: morphogenesis	81	31	119	1075	11404	7.64	6.09	12.22	6.05	ADAM12 ANGPT1 ANGPTL4 ANKRD2 BCL11A CALCA FABP5 FGF10 FLI1 GJA1 GLI3 IL8 JAG1 MID1 NELL1 PAX6 POSTN SLIT2 SPRY1 SPRY2 SYK TBX3 TNNT3 Angpt1:H Arhgap15:H Bcl11a:H Boc:H Cd28:H Creb1:H Creb1:H Cxcr4:H Cxcr4:H Cyp26b1:H Doc3:H Egr1:H Egr1:H Enpep:H Fgd4:H Fgd4:H Fgf10:H Fgf10:H Fli1:H Fos:H Gja1:H Gli3:H Hgf:H Hgf:H Hr38:H Inpp5d:H Itga4:H Jag1:H Jag1:H Nr4a3:H Nr4a3:H Omd:H Ostn:H Pax6:H Pax6:H Ptg…
ENSGALG00000030382	W	W:3152774-3287030:-1		2.6475	1.26977	2.08502				GO:0007165 [4]: signal transduction	147	64	104	2762	9349	7.36	5.94	11.86	6.05	ADAMTS1 ADCY2 ADRA1B ADRA2A AHR ANGPT1 ARHGAP20 ASB9 C3 C3AR1 CALCA CD28 CD83 CHRNB2 CREB1 CX3CR1 CXCR4 DAPP1 EPHA3 FGF10 FKBP1A GHRL GJA1 GLI3 GNG4 GPR141 GPR18 GPR34 GRID2 HTR1D ICOSLG IGSF6 IL18R1 IL6 IL8 INPP5D ITGA4 JAG1 KSR LTK LY86 LY96 NCF4 NOXO1 OPRL1 P2RY8 PLA2G4B PLCB2 PTGER4 PTGFR PTPN6 RALGPS1 RASD2 RGS18 RHPN1 RPS6KA1 SLA SPRY1 SPRY2 SRC SYK TNFRSF19 TNFRSF1B WNT5B 5-HT1B:H ACXD:H A…
LOC107049174	.	.	Golgi phosphoprotein 3-like	2.6475	1.26977	2.08502				GO:0009581 [5]: detection of external stimulus	12	2	148	1365	11114	7.15	5.84	0	0	GJA1 LUM MYO7A OPRL1 PAX6 SLIT2 Chrnb2:H Chrnb2:H Myo7a:H Myo7a:H Plcb2:H ck:H
LOC107050435	.	.	uncharacterized LOC107050435	1.39233	0.669409	2.07994				GO:0007600 [5]: sensory perception	12	2	148	1355	11124	7.04	5.75	0	0	GJA1 LUM MYO7A OPRL1 PAX6 SLIT2 Chrnb2:H Chrnb2:H Myo7a:H Myo7a:H Plcb2:H ck:H
ANGPT1	2	2:131784819-131949415:-1	angiopoietin 1	9.41233	4.526	2.07961				GO:0050874 [3]: organismal physiological process	96	47	121	1797	10314	6.93	5.6	11.48	5.97	ABAT AKR1D1 ANXA8 ATRNL1 BPI C3 C3AR1 CALCA CD1A CD28 CD83 CHRNB2 CX3CR1 FGF10 FLI1 FOS GCHFR GJA1 GRID2 HTR1D ICOSLG IFIT5 IGSF6 IL18R1 IL6 IL8 KCNG2 KCNMB1 LUM LY64 LY86 LY96 MEOX2 MYO7A OASL OPRL1 PAX6 PLA2G4B PTGER4 PTGFR SLC1A1 SLC22A2 SLIT2 SPON2 SYK TBC1D8 TLR7 5-HT1B:H Abat:H Abat:H Anxa8:H Bcl11a:H C3:H C3ar1:H C3ar1:H CG5621:H Calca:H Calca:H Cd28:H Cd28:H Chrnb2:H Chrnb2:H Cxcr4:H Cxcr…
TRAIL-LIKE	.	.	TNF-related apoptosis inducing ligand-like	24.039	11.562	2.07914				GO:0009887 [4]: organogenesis	71	27	123	923	11556	6.36	5.34	10.95	5.72	ADAM12 ANGPT1 ANGPTL4 ANKRD2 BCL11A CALCA FABP5 FGF10 FLI1 GJA1 IL8 JAG1 NELL1 PAX6 POSTN SLIT2 SPRY1 SPRY2 SYK TBX3 TNNT3 Angpt1:H Bcl11a:H Boc:H Cd28:H Creb1:H Creb1:H Cxcr4:H Cxcr4:H Doc3:H Egr1:H Egr1:H Enpep:H Fgf10:H Fgf10:H Fli1:H Fos:H Gja1:H Gli3:H Hr38:H Inpp5d:H Itga4:H Jag1:H Jag1:H Nr4a3:H Nr4a3:H Omd:H Ostn:H Pax6:H Pax6:H Ptger4:H Ptger4:H Scarf1:H Slit2:H Smyd1:H Spry2:H Src64B:H …
KCNG2	2	2:56443565-56469064:-1	Potassium voltage-gated channel subfamily G member 2	3.22683	1.55464	2.07562				GO:0048513 [3]: organ development	71	27	123	929	11550	6.25	5.31	10.83	5.72	ADAM12 ANGPT1 ANGPTL4 ANKRD2 BCL11A CALCA FABP5 FGF10 FLI1 GJA1 IL8 JAG1 NELL1 PAX6 POSTN SLIT2 SPRY1 SPRY2 SYK TBX3 TNNT3 Angpt1:H Bcl11a:H Boc:H Cd28:H Creb1:H Creb1:H Cxcr4:H Cxcr4:H Doc3:H Egr1:H Egr1:H Enpep:H Fgf10:H Fgf10:H Fli1:H Fos:H Gja1:H Gli3:H Hr38:H Inpp5d:H Itga4:H Jag1:H Jag1:H Nr4a3:H Nr4a3:H Omd:H Ostn:H Pax6:H Pax6:H Ptger4:H Ptger4:H Scarf1:H Slit2:H Smyd1:H Spry2:H Src64B:H …
MPEG1	5	5:16906936-16909098:+1	macrophage expressed 1	142.906	68.8558	2.07543				GO:0007275 [2]: development	105	38	112	1600	10879	5.99	5.15	10.45	5.63	ADAM12 ADRA1B ALAD ANGPT1 ANGPTL4 ANKRD2 ATRNL1 BCL11A CALCA FABP5 FGF10 FLI1 FOS GJA1 GLI3 IL8 JAG1 MEOX2 MID1 NELL1 NME5 PAX6 POSTN PRRX1 SLIT2 SPATA4 SPON2 SPRY1 SPRY2 SYK TBX3 TNNT3 WNT5B Alad:H Alad:H Angpt1:H Arhgap15:H Bcl11a:H Boc:H Cd28:H Creb1:H Creb1:H Cxcr4:H Cxcr4:H Cyp26b1:H Doc3:H Egr1:H Egr1:H Enpep:H Fgd4:H Fgd4:H Fgf10:H Fgf10:H Fli1:H Fos:H Gja1:H Gli3:H HEM2:H Hgf:H Hgf:H Hr38…
ENSGALG00000033048	AADN04017173.1	AADN04017173.1:602-4151:+1		5.77167	2.78741	2.07062				GO:0006955 [4]: immune response	50	25	143	722	11389	5.77	5.01	10.47	5.63	ATRNL1 BPI C3 C3AR1 CD1A CD28 CD83 CX3CR1 FGF10 FOS ICOSLG IFIT5 IGSF6 IL18R1 IL6 IL8 LY64 LY86 LY96 OASL PLA2G4B PTGER4 SPON2 SYK TLR7 Bcl11a:H C3:H C3ar1:H C3ar1:H Calca:H Calca:H Cd28:H Cd28:H Cxcr4:H Cxcr4:H Egr1:H Egr1:H Fgf10:H Icoslg:H Il6:H Il6:H Inpp5d:H Ly78:H Ly96:H Spon2:H Syk:H Syk:H Tlr7:H Tnfrsf1b:H Tnfrsf1b:H
LOC421054	.	.	transmembrane protein 200C-like	1.66417	0.803773	2.07044				GO:0009607 [4]: response to biotic stimulus	57	29	139	929	11182	5.51	4.83	10.15	5.45	ATRNL1 BPI C3 C3AR1 CD1A CD28 CD83 CX3CR1 DUSP1 FGF10 FOS ICOSLG IFIT5 IGSF6 IL18R1 IL6 IL8 LY64 LY86 LY96 NCF4 NME5 OASL PIP3-E PLA2G4B PTGER4 SPON2 SYK TLR7 At5g51060:H Bcl11a:H C3:H C3ar1:H C3ar1:H CG33147:H Calca:H Calca:H Cd28:H Cd28:H Cxcr4:H Cxcr4:H Egr1:H Egr1:H Fgf10:H Icoslg:H Il6:H Il6:H Inpp5d:H Ly78:H Ly96:H Spon2:H Syk:H Syk:H Tlr7:H Tnfrsf1b:H Tnfrsf1b:H shark:H
ENSGALG00000035235	AADN04001768.1	AADN04001768.1:11741-13169:-1		36.9992	17.9045	2.06647				GO:0051239 [4]: regulation of organismal physiological process	18	8	142	104	12375	4.95	4.51	9.81	5.21	CD28 FGF10 ICOSLG KCNG2 C3:H Cd28:H Cd28:H Fgf10:H Gja1:H Il6:H Il6:H Inpp5d:H Omd:H Ostn:H Ptger4:H Ptger4:H Syk:H Syk:H
LOC100857615	.	.	platelet glycoprotein VI-like	36.9992	17.9045	2.06647				GO:0006000 [8]: fructose metabolism	2	1	5	2	18108	4.95	4.51	6.91	3.34	FBP1 At1g43670:H
ENSGALG00000026884	Z	Z:7161479-7165333:-1		112.4	54.537	2.06098				GO:0006595 [7]: polyamine metabolism	2	1	5	2	18108	4.95	4.51	6.91	3.34	At5g13700:H Smox:H
PINLYP	.	.	phospholipase A2 inhibitor and LY6/PLAUR domain containing	112.4	54.537	2.06098				GO:0006952 [5]: defense response	54	26	142	812	11299	4.93	4.48	9.58	5.07	ATRNL1 BPI C3 C3AR1 CD1A CD28 CD83 CX3CR1 FGF10 FOS ICOSLG IFIT5 IGSF6 IL18R1 IL6 IL8 LY64 LY86 LY96 NCF4 OASL PLA2G4B PTGER4 SPON2 SYK TLR7 At5g51060:H Bcl11a:H C3:H C3ar1:H C3ar1:H CG33147:H Calca:H Calca:H Cd28:H Cd28:H Cxcr4:H Cxcr4:H Egr1:H Egr1:H Fgf10:H Icoslg:H Il6:H Il6:H Inpp5d:H Ly78:H Ly96:H Spon2:H Syk:H Syk:H Tlr7:H Tnfrsf1b:H Tnfrsf1b:H shark:H
DDX52	.	.	DEAD (Asp-Glu-Ala-Asp) box polypeptide 52	1.19283	0.578864	2.06065				GO:0006954 [5]: inflammatory response	19	11	157	185	11926	4.55	4.17	9.45	5.03	ATRNL1 C3 C3AR1 FOS IL8 LY64 LY86 LY96 PLA2G4B SYK TLR7 C3:H Calca:H Calca:H Ly78:H Ly96:H Tlr7:H Tnfrsf1b:H Tnfrsf1b:H
ENSGALG00000008615	5	5:24709933-24791051:-1		1.03767	0.503727	2.05998				GO:0006139 [5]: nucleobase, nucleoside, nucleotide and nucleic acid metabolism	69	21	147	2946	9165	4.53	4.17	0	0	ADCY2 AHR BCL11A CBX7 CREB1 EGR1 FGF10 FLI1 FOS FOSL2 GLI3 KYNU MEOX2 NME5 NR4A3 PAX6 PRDM10 PRRX1 SMYD1 SSBP2 TBX3 ACXD:H Adcy2:H Adcy2:H Ahr:H Ahr:H Asb9:H Bcl11a:H CG5589:H Cbx7:H Cdkn2b:H Cdkn2b:H Creb1:H Creb1:H Ddx52:H Doc3:H Egr1:H Egr1:H Ets21C:H Fgf10:H Fhl5:H Fli1:H Fos:H Fosl2:H Gli3:H Hr38:H Kynu:H Kynu:H Meox2:H Meox2:H Mid1:H Nme5:H Nr4a3:H Nr4a3:H Pax6:H Pax6:H Prrx1:H Prrx1:H ROK1…
LTK	.	.	leukocyte receptor tyrosine kinase	1.03767	0.503727	2.05998				GO:0006575 [6]: amino acid derivative metabolism	7	2	4	224	17886	4.17	3.93	6.1	3.06	ABAT KYNU Abat:H At3g10340:H At5g13700:H Kynu:H Smox:H
ENSGALG00000031501	AADN04001768.1	AADN04001768.1:1422-2534:+1		2.721	1.321	2.0598				GO:0007166 [5]: cell surface receptor linked signal transduction	89	36	132	1385	10726	4.16	3.93	8.68	4.46	ADAMTS1 ADRA1B ADRA2A C3 C3AR1 CALCA CD28 CX3CR1 CXCR4 EPHA3 FGF10 GHRL GNG4 GPR141 GPR18 GPR34 GRID2 HTR1D IGSF6 IL6 IL8 ITGA4 JAG1 LTK LY96 OPRL1 P2RY8 PLCB2 PTGER4 PTGFR PTPN6 SPRY1 SRC SYK TNFRSF1B WNT5B 5-HT1B:H ACXD:H AR-2:H Adcy2:H Adcy2:H Adra1b:H Adra1b:H Adra2a:H Angpt1:H Arhgap20:H C3ar1:H C3ar1:H CG8641:H Calca:H Calca:H Cd28:H Cx3cr1:H Cxcr4:H Cxcr4:H Epha3:H Fgf10:H Fgf10:H Gng4:H G…
ITGA4	7	7:14373277-14404802:-1	integrin subunit alpha 4	12.9107	6.27259	2.05827				GO:0050877 [4]: neurophysiological process	29	5	145	1502	10977	3.91	3.74	0	0	ABAT CHRNB2 GCHFR GJA1 GRID2 HTR1D KCNMB1 LUM MYO7A OPRL1 PAX6 SLC1A1 SLIT2 5-HT1B:H Abat:H Abat:H CG5621:H Chrnb2:H Chrnb2:H Grid2:H Myo7a:H Myo7a:H Plcb2:H Syk:H Syt10:H Syt7:H ck:H nAcRbeta-96A:H sli:H
ENSGALG00000008834	8	8:16677139-16683489:+1		1.056	0.514	2.05447				GO:0046649 [6]: lymphocyte activation	14	7	143	91	12388	3.86	3.71	8.72	4.46	CD28 FGF10 ICOSLG Bcl11a:H Cd28:H Cd28:H Cxcr4:H Cxcr4:H Egr1:H Egr1:H Fgf10:H Icoslg:H Inpp5d:H Syk:H
ENSGALG00000030707	W	W:1511422-1601216:+1		1.491	0.728455	2.0468				GO:0019932 [6]: second-messenger-mediated signaling	17	10	158	169	11942	3.77	3.64	8.66	4.46	ADRA1B ADRA2A C3AR1 CALCA HTR1D IL8 OPRL1 PLA2G4B PLCB2 PTGER4 5-HT1B:H Adcy2:H Adcy2:H Adra1b:H Ptger4:H Ptger4:H Syk:H
ENSGALG00000042708	AADN04002716.1	AADN04002716.1:306-2050:+1		2.66567	1.30327	2.04536				GO:0050792 [3]: regulation of viral life cycle	4	3	165	6	12105	3.43	3.36	8.52	4.39	CD28 HS3ST5 IL8 Cd28:H
FBLIM1	21	21:4225296-4228219:+1	filamin binding LIM protein 1	2.181	1.06941	2.03944				GO:0030098 [4]: lymphocyte differentiation	6	5	145	43	12436	3.37	3.32	8.29	4.22	Bcl11a:H Cd28:H Egr1:H Egr1:H Inpp5d:H Syk:H
WDFY2	.	.	WD repeat and FYVE domain containing 2	1.382	0.679455	2.03398				GO:0045321 [5]: immune cell activation	15	7	143	100	12379	3.33	3.28	8.18	4.17	CD28 FGF10 ICOSLG IL8 Bcl11a:H Cd28:H Cd28:H Cxcr4:H Cxcr4:H Egr1:H Egr1:H Fgf10:H Icoslg:H Inpp5d:H Syk:H
KLHL14	2	2:106913658-106974273:-1	kelch-like protein 14	1.94833	0.959409	2.03076				GO:0001775 [4]: cell activation	15	7	143	101	12378	3.27	3.26	8.12	4.16	CD28 FGF10 ICOSLG IL8 Bcl11a:H Cd28:H Cd28:H Cxcr4:H Cxcr4:H Egr1:H Egr1:H Fgf10:H Icoslg:H Inpp5d:H Syk:H
ENSGALG00000040853	KQ759337.1	KQ759337.1:23532-24946:-1		3.85033	1.89605	2.03072				GO:0006519 [5]: amino acid and derivative metabolism	14	2	4	361	17749	3.27	3.26	5.17	2.53	ABAT HAL HS3ST5 KYNU Abat:H At3g10340:H At5g13700:H CG7433:H Hal:H Hal:H Kynu:H Kynu:H SPAC19D5.07:H Smox:H
TRAM1	.	.	translocation associated membrane protein 1	1.47167	0.724864	2.03027				GO:0044238 [4]: primary metabolism	190	65	103	6221	5890	3	3.08	0	0	ABAT ABCA1 ADAM12 ADAMTS1 ADCY2 AHR AKR1D1 ALDH3B1 ANGPTL4 BCL11A CAMK1D CBX7 CD28 CREB1 DAPP1 DUSP1 EGR1 ENPEP EPHA3 FAAH FABP5 FBP1 FGF10 FKBP1A FLI1 FOS FOSL2 GLI3 HAL HGF HS3ST5 KSR KYNU LCAT LTK MELL1 MEOX2 MID1 MMP7 NME5 NR4A3 OASL PAX6 PCSK1 PLA1A PLA2G10 PLA2G4B PLCB2 PLTP PRCP PRDM10 PRRX1 PTPN5 PTPN6 RPS6KA1 SCARF1 SH3RF2 SMYD1 SRC SSBP2 SSH2 ST3GAL5 SYK TBX3 TUBB1 ACXD:H Abat:H Abca1:H…
CCBE1	.	.	collagen and calcium binding EGF domains 1	6.1305	3.02018	2.02984
ENSGALG00000004747	6	6:11934807-11935965:-1		2.56633	1.26445	2.0296
C26H6ORF106	.	.	chromosome 26 open reading frame, human C6orf106	1.23967	0.611409	2.02756
PRRX1	8	8:4848542-4880892:-1	paired related homeobox 1	9.844	4.85664	2.02692
ENSGALG00000032126	2	2:54464648-54466061:+1		3.54483	1.75173	2.02362
ENSGALG00000014361	1	1:76480754-76505020:-1		1.8475	0.914955	2.01923
RALGPS1	17	17:10765226-10860650:+1	Ral GEF with PH domain and SH3 binding motif 1	2.85117	1.41564	2.01405
CX3CR1	2	2:44545657-44555354:+1	C-X3-C motif chemokine receptor 1	2.58667	1.28714	2.00963
LOC107052478	.	.	zinc finger protein OZF-like	1.34	0.669	2.00299
ENSGALG00000007713	18	18:10504470-10508384:-1		114.591	57.3712	1.99737
LOC107050723	.	.	uncharacterized LOC107050723	9.68917	4.85468	1.99584
ENSGALG00000046294	AADN04000861.1	AADN04000861.1:37454-38560:+1		6.1905	3.10655	1.99273
ENSGALG00000016653	3	3:107669283-107669540:-1		4.83317	2.42823	1.99041
ENSGALG00000003866	17	17:6509409-6515905:-1		1.2125	0.609364	1.98978
LOC101750812	.	.	cytokine receptor common subunit beta-like	5.7745	2.90345	1.98884
ENSGALG00000027778	5	5:1377321-1383994:-1		1.2375	0.622909	1.98665
LOC770492	.	.	ras-related and estrogen-regulated growth inhibitor-like	1.2375	0.622909	1.98665
ENSGALG00000036558	AADN04006411.1	AADN04006411.1:2208-10360:-1		1.773	0.893545	1.98423
ZNF488	.	.	zinc finger protein 488	1.6705	0.842045	1.98386
SPON2	4	4:85477008-85483148:+1	spondin 2	21.8013	10.9922	1.98334
ENSGALG00000045565	AADN04013032.1	AADN04013032.1:1984-3864:-1		1.1095	0.56	1.98125
ENSGALG00000026533	1	1:135901954-135902199:-1		11.3135	5.7135	1.98013
PLA1A	1	1:80169358-80186176:-1	phospholipase A1 member A	1.82817	0.923409	1.9798
LOC107049527	.	.	rho GTPase-activating protein 32-like	4.1425	2.09336	1.97887
EMB	Z	Z:14736701-14761276:-1	embigin	2.772	1.40114	1.97839
ENSGALG00000044182	AADN04014580.1	AADN04014580.1:202-2172:+1		13.04	6.60564	1.97407
SH3RF2	13	13:17864463-17882839:+1	SH3 domain containing ring finger 2	2.04017	1.03355	1.97395
CLRN3	6	6:33305940-33313820:-1	clarin 3	1.05083	0.5325	1.9734
NUGGC	3	3:105564501-105573559:+1	nuclear GTPase, germinal center associated	1.25167	0.6345	1.97268
CNTN4	12	12:17898685-18121966:+1	contactin 4	1.57583	0.799727	1.97046
ENSGALG00000030905	Z	Z:43435397-43441708:+1		1.41117	0.716864	1.96853
LOC101752211	.	.	ras GTPase-activating protein 1-like	2.1895	1.11327	1.96672
ENSGALG00000044117	AADN04004026.1	AADN04004026.1:11492-13585:+1		1.392	0.7085	1.96471
ENSGALG00000035279	KQ759558.1	KQ759558.1:16736-17065:-1		2.31617	1.18318	1.95757
ENSGALG00000040285	AADN04011183.1	AADN04011183.1:2539-6012:+1		4.19433	2.14368	1.9566
MEOX2	2	2:28094371-28147050:-1	mesenchyme homeobox 2	1.21733	0.622227	1.95641
ENSGALG00000035473	Z	Z:25754908-25778734:+1		2.27133	1.161	1.95636
ENSGALG00000008638	2	2:19525053-19554688:-1		6.7935	3.479	1.95272
LOC420515	.	.	macrophage mannose receptor 1-like	6.7935	3.479	1.95272
ENSGALG00000040085	AADN04002517.1	AADN04002517.1:1941-5078:-1		3.18033	1.62886	1.95249
ENSGALG00000042783	AADN04009797.1	AADN04009797.1:2016-3453:+1		7.12533	3.65432	1.94984
GRID2	4	4:37026690-37311626:+1	glutamate receptor, ionotropic, delta 2	1.0335	0.530273	1.949
ENSGALG00000039548	AADN04001768.1	AADN04001768.1:6847-8794:-1		2.44183	1.25364	1.9478
ABCB1LB	.	.	ATP-binding cassette, sub-family B (MDR/TAP), member 1-like B	5.3615	2.75905	1.94324
LOC107054428	.	.	glutamate receptor-interacting protein 1-like	3.3255	1.71268	1.94169
LOC428335	.	.	hyperpolarization activated cyclic nucleotide-gated potassium channel 2	1.94333	1.00132	1.94078
BPI	.	.	bactericidal/permeability-increasing protein	538.981	278.625	1.93443
ENSGALG00000000189	Z	Z:45718092-45739382:-1		1.3655	0.706727	1.93215
ENSGALG00000004252	28	28:4944768-4948239:+1		7.65717	3.96373	1.93181
ENSGALG00000039023	W	W:5058576-5156723:-1	Nipped-B homolog-like	2.533	1.31164	1.93118
ENSGALG00000043111	AADN04002672.1	AADN04002672.1:7081-13579:+1		5.41	2.80186	1.93086
CD83	2	2:60893104-60904213:+1	CD83 molecule	128.815	66.714	1.93085
ENSGALG00000012080	2	2:46391293-46392168:-1		1.47767	0.766682	1.92735
KIAA0408	3	3:59313819-59318563:+1	KIAA0408	1.35167	0.702864	1.92309
KIAA0895L	.	.	KIAA0895-like	2.37367	1.2355	1.92122
LOC107056268	.	.	endogenous retrovirus group K member 18 Pol protein-like	8.03117	4.18255	1.92016
ENSGALG00000045640	AADN04024605.1	AADN04024605.1:911-5580:-1		148.105	77.1923	1.91865
ENSGALG00000009096	4	4:17820524-17851478:-1		6.9675	3.63686	1.9158
ENSGALG00000034337	2	2:148557816-148581455:+1		2.41483	1.26059	1.91564
LOC769000	.	.	mothers against decapentaplegic homolog 2-like	3.73633	1.95305	1.91308
ENSGALG00000040075	AADN04012524.1	AADN04012524.1:1472-3986:+1		5.088	2.67027	1.90542
BCAN	25	25:1478428-1486301:+1	brevican	2.509	1.31718	1.90482
ADAMTS1	1	1:103028117-103033674:-1	ADAM metallopeptidase with thrombospondin type 1 motif 1	2.45217	1.28832	1.90339
ENSGALG00000012621	Z	Z:41977884-42019651:+1		1.90733	1.00418	1.89939
LUM	1	1:43987396-43999595:-1	lumican	94.0882	49.5838	1.89756
KCNK2	3	3:20865614-20937332:-1	potassium channel, subfamily K, member 2	1.12933	0.595182	1.89746
CDK15	7	7:11637210-11669559:+1	cyclin-dependent kinase 15	1.75183	0.926864	1.89007
C3H8ORF80	.	.	chromosome 3 open reading frame, human C8orf80	9.94033	5.266	1.88764
HGF	1	1:10650557-10710329:+1	hepatocyte growth factor (hepapoietin A; scatter factor)	17.4608	9.25382	1.88688
FAM167A	.	.	family with sequence similarity 167, member A	3.77333	2.00118	1.88555
PLA2G10	.	.	phospholipase A2, group X	11.655	6.18636	1.88398
ENSGALG00000032600	2	2:6583540-6585965:-1		2.4605	1.30627	1.8836
ENSGALG00000010030	5	5:36011117-36040426:-1		3.19383	1.69818	1.88074
THSD7A	2	2:26317033-26546888:-1	thrombospondin, type I, domain containing 7A	9.92283	5.28077	1.87905
ENSGALG00000045970	AADN04004242.1	AADN04004242.1:4936-6446:+1		1.55317	0.829318	1.87282
ENSGALG00000033705	KQ759511.1	KQ759511.1:21-27908:-1		1.11767	0.596818	1.87271
SSH2	19	19:6084890-6123770:-1	slingshot protein phosphatase 2	3.31383	1.77023	1.87198
NIPAL1	4	4:66993587-66998001:-1	NIPA-like domain containing 1	1.45833	0.779273	1.8714
ENSGALG00000037738	AADN04002626.1	AADN04002626.1:480-14280:+1		25.1552	13.4423	1.87135
LOC107049459	.	.	thioredoxin-like protein 1	7.97283	4.26064	1.87128
NOXA1	17	17:1392828-1406063:+1	NADPH oxidase activator 1	13.8532	7.41636	1.86792
LOC100858017	.	.	immunoglobulin superfamily member 1-like	11.4525	6.13864	1.86564
LOC101752113	.	.	uncharacterized LOC101752113	2.2535	1.21073	1.86128
ENSGALG00000004436	14	14:3893187-3904532:+1		24.6202	13.2322	1.86062
ENSGALG00000008653	5	5:24995617-25023029:+1		3.88	2.08636	1.85969
SEC14L5	14	14:13390794-13417996:+1	SEC14 like lipid binding 5	6.23517	3.35377	1.85915
ENSGALG00000010903	4	4:45907175-45909884:+1		2.60333	1.40086	1.85838
ENSGALG00000006756	20	20:10542586-10549724:-1		346.973	186.922	1.85625
B3GLCT	1	1:174956251-174999081:-1	beta 3-glucosyltransferase	39.4928	21.2826	1.85564
KCNK13	5	5:43755694-43807523:+1	potassium two pore domain channel subfamily K member 13	3.91017	2.10964	1.85348
CD1.2	16	16:18036-20776:+1		58.5942	31.6144	1.8534
SLC1A1	Z	Z:27065748-27123410:+1	solute carrier family 1 member 1	1.24783	0.673455	1.85288
C3	AADN04001210.1	AADN04001210.1:6888-29576:+1	complement C3	10.2092	5.51709	1.85046
AHR	.	.	aryl hydrocarbon receptor	2.36583	1.28	1.84831
C10orf128	.	.	chromosome 10 open reading frame 128	184.366	99.7541	1.84821
ASB9	1	1:122126014-122139309:+1	ankyrin repeat and SOCS box containing 9	7.57967	4.10345	1.84714
LOC107054267	.	.	dipeptidase 2-like	5.294	2.87314	1.84259
ENSGALG00000037235	AADN04014262.1	AADN04014262.1:120-5932:+1		5.527	3.00114	1.84164
ENSGALG00000039438	AADN04000879.1	AADN04000879.1:34868-43489:+1		1.81367	0.985773	1.83984
HAL	1	1:45679241-45691863:-1	histidine ammonia-lyase	2.694	1.46536	1.83845
COL13A1	.	.	collagen, type XIII, alpha 1	2.62667	1.42918	1.83788
ENSGALG00000041149	AADN04016040.1	AADN04016040.1:414-4564:+1		12.2852	6.69159	1.83591
PLA2G4B	.	.	phospholipase A2, group IVB (cytosolic)	7.06733	3.85105	1.83517
FABP5	2	2:121898100-121903161:+1	fatty acid binding protein 5	952.024	519.142	1.83384
LOC107056182	.	.	glycerophosphocholine phosphodiesterase GPCPD1-like	3.14717	1.71732	1.83261
EPSTI1	1	1:166655214-166707862:-1	epithelial stromal interaction 1	26.9008	14.7227	1.82717
ENSGALG00000003433	11	11:3565749-3573871:+1		4.31983	2.36991	1.82278
TSPAN32	.	.	tetraspanin 32	3.36583	1.84745	1.82188
LOC100859870	.	.	platelet glycoprotein VI-like	25.9802	14.2734	1.82019
ARHGAP15	7	7:32874820-33193628:+1	Rho GTPase activating protein 15	13.5297	7.44418	1.81748
LOC107057074	.	.	eukaryotic translation initiation factor 4E transporter-like	2.11433	1.16377	1.81679
ENSGALG00000040673	AADN04010040.1	AADN04010040.1:909-8043:-1		6.392	3.5215	1.81514
LOC107056462	.	.	alpha-actinin-1-like	6.392	3.5215	1.81514
KIAA0226L	.	.	KIAA0226-like	14.4318	7.95132	1.81502
TMEM237	.	.	transmembrane protein 237	7.22917	3.99195	1.81093
SLC47A1	.	.	solute carrier family 47, member 1	8.31433	4.6005	1.80727
ENSGALG00000008912	2	2:20693000-20781828:-1		4.30533	2.38395	1.80596
LOC107049269	.	.	glycine N-acyltransferase-like protein 3	1.55667	0.863091	1.8036
PTPN5	5	5:12685002-12717134:-1	protein tyrosine phosphatase, non-receptor type 5 (striatum-enriched)	26.7318	14.829	1.80268
ENSGALG00000044408	AADN04001891.1	AADN04001891.1:12427-14408:-1		5.371	2.984	1.79993
LOC107049733	.	.	natterin-3-like	5.371	2.984	1.79993
ENSGALG00000000966	21	21:684498-695542:+1		1.0155	0.5645	1.79894
IGSF6	14	14:8783763-8789240:-1	immunoglobulin superfamily, member 6	91.6412	50.9419	1.79894
LOC107057522	.	.	testis anion transporter 1-like	1.16217	0.646818	1.79674
ENSGALG00000039720	3	3:16667973-16755585:-1		14.3482	7.99245	1.79521
ENSGALG00000030437	AADN04023835.1	AADN04023835.1:24-1038:+1		1.30633	0.728227	1.79385
CCDC147	.	.	coiled-coil domain containing 147	1.09317	0.609545	1.79341
SPNS3	19	19:3081801-3101570:-1	spinster homolog 3 (Drosophila)	1.82883	1.02064	1.79186
MAP10	.	.	microtubule-associated protein 10	1.83067	1.02368	1.78832
SYT10	1	1:58696926-58729393:+1	synaptotagmin X	7.6075	4.2585	1.78643
SLC22A2	.	.	solute carrier family 22 (organic cation transporter), member 2	1.297	0.727182	1.7836
A2ML1	1	1:76082957-76112683:+1	alpha-2-macroglobulin-like 1	1.101	0.617318	1.78352
GPR34	1	1:111894570-111895715:-1	G protein-coupled receptor 34	218.837	122.795	1.78213
SIGLEC15	Z	Z:2227320-2233705:-1	sialic acid binding Ig like lectin 15	2.47067	1.38645	1.782
ENSGALG00000036865	AADN04011706.1	AADN04011706.1:4085-5567:-1		1.19533	0.671273	1.7807
ENSGALG00000040584	9	9:19350332-19350580:-1		1.98617	1.11573	1.78015
RUBCNL	1	1:168099691-168119251:-1	RUN and cysteine rich domain containing beclin 1 interacting protein like	13.981	7.85423	1.78006
ENSGALG00000029790	AADN04006105.1	AADN04006105.1:1653-11981:-1		2.55967	1.43986	1.77771
LOC426106	.	.	C-type lectin domain family 17, member A-like	4.344	2.44418	1.77728
NR4A3	2	2:89674440-89694916:-1	nuclear receptor subfamily 4 group A member 3	2.80983	1.58136	1.77684
ENSGALG00000044352	1	1:139824921-139826272:+1		5.27733	2.97586	1.77338
SYT8	5	5:14108059-14112076:-1	synaptotagmin 8	8.59867	4.84909	1.77325
FP	8	8:18795462-18813236:-1	prostaglandin F receptor	1.54017	0.869318	1.77169
ENSGALG00000032104	KQ759493.1	KQ759493.1:3620-28747:+1		7.84233	4.42764	1.77122
CALCA	5	5:10532056-10544141:+1	calcitonin	3.83517	2.16632	1.77036
TBX3	15	15:12277734-12287707:+1	T-box 3	1.80433	1.01923	1.7703
PTGFR	.	.	prostaglandin F receptor (FP)	2.7245	1.53973	1.76947
TRANK1	.	.	tetratricopeptide repeat and ankyrin repeat containing 1	3.606	2.03823	1.76918
ENSGALG00000015038	1	1:80531090-80538489:-1		1.37183	0.776	1.76783
LOC415616	.	.	ras GTPase-activating-like protein IQGAP1-like	76.3533	43.2557	1.76516
MMEL1	21	21:1372224-1393392:+1	membrane metallo-endopeptidase-like 1	4.743	2.68709	1.76511
ENSGALG00000043758	W	W:1442287-1466769:+1		7.78583	4.41155	1.76488
ENSGALG00000008048	1	1:952077-958465:+1		1.20667	0.683773	1.76472
WNT5B	1	1:60973501-60989342:+1	wingless-type MMTV integration site family, member 5B	41.0258	23.2832	1.76204
BOC	1	1:83273631-83292347:-1	BOC cell adhesion associated, oncogene regulated	2.837	1.61123	1.76077
MYL12A	.	.	myosin, light chain 12A, regulatory, non-sarcomeric	222.532	126.394	1.76063
PTCHD2	.	.	patched domain containing 2	2.21833	1.26018	1.76033
ENSGALG00000014378	4	4:73972243-73988397:-1		1.41783	0.805818	1.7595
ENSGALG00000023780	26	26:4755757-4761750:-1		45.7058	25.9774	1.75945
ENSGALG00000043274	1	1:112419085-112421481:+1		4.06667	2.31395	1.75745
PTGER4	Z	Z:12839413-12850084:+1	prostaglandin E receptor 4	2.785	1.58532	1.75675
CBX7	.	.	chromobox 7	9.7605	5.55836	1.756
ARHGAP20	1	1:179517182-179576104:+1	Rho GTPase activating protein 20	19.8782	11.3245	1.75533
MYO7A	1	1:193221562-193279711:-1	myosin VIIA	1.87783	1.07014	1.75476
ENSGALG00000042035	AADN04009156.1	AADN04009156.1:21-9512:+1		1.15917	0.661682	1.75185
LOC107056611	.	.	transmembrane protein 237-like	1.15917	0.661682	1.75185
ENSGALG00000014184	W	W:3908079-3957937:-1		1.17217	0.669545	1.75069
ENSGALG00000037690	AADN04001826.1	AADN04001826.1:3077-17579:+1		37.93	21.669	1.75043
ENSGALG00000045902	AADN04012247.1	AADN04012247.1:3985-4813:-1		1.23133	0.704091	1.74883
ENSGALG00000030503	AADN04010127.1	AADN04010127.1:2-6096:-1		7.562	4.32973	1.74653
TMEM37	7	7:28522174-28525263:-1	transmembrane protein 37	1.173	0.671864	1.74589
ENSGALG00000032103	2	2:145268134-145276406:-1		2.49817	1.43145	1.74519
MID1	1	1:124632218-124725073:+1	midline 1 (Opitz/BBB syndrome)	5.94867	3.40936	1.7448
GPR18	1	1:144625392-144630634:+1	G protein-coupled receptor 18	3.01567	1.73059	1.74256
ENSGALG00000029246	AADN04003908.1	AADN04003908.1:7857-10299:+1		14.7535	8.47591	1.74064
ENSGALG00000043196	AADN04001643.1	AADN04001643.1:18676-20953:-1		1.70617	0.980591	1.73994
LOC107056302	.	.	uncharacterized LOC107056302	1.73217	0.995818	1.73944
VSIG4	.	.	V-set and immunoglobulin domain containing 4	234.652	134.965	1.73861
SPATA4	4	4:44650490-44657234:-1	spermatogenesis associated 4	9.09967	5.23655	1.73772
C28H19ORF35	.	.	chromosome 28 open reading frame, human C19orf35	1.888	1.08682	1.73718
TLR7	1	1:123406951-123414379:-1	toll like receptor 7	30.7655	17.7239	1.73582
FAM20A	18	18:7945550-7954990:-1	family with sequence similarity 20, member A	3.602	2.07536	1.7356
ENSGALG00000004286	6	6:11020202-11048579:+1		2.90017	1.67468	1.73177
TNFRSF1B	.	.	tumor necrosis factor receptor superfamily, member 1B	9.4125	5.44032	1.73014
AKR1D1	1	1:56606803-56640860:+1	aldo-keto reductase family 1 member D1	46.9312	27.1431	1.72903
ENSGALG00000046547	Z	Z:27322059-27322973:-1		28.714	16.646	1.72497
ENSGALG00000044799	4	4:255370-259277:-1		18.611	10.79	1.72485
ENSGALG00000004637	19	19:6652849-6660676:+1		15.2392	8.8365	1.72457
RASD2	1	1:52085845-52093273:-1	RASD family member 2	1.42917	0.829045	1.72387
SHPK	.	.	sedoheptulokinase	15.8858	9.22936	1.72123
ENSGALG00000033660	24	24:1532431-1535487:+1		25.572	14.862	1.72063
ENSGALG00000017362	13	13:11459253-11468309:+1		138.842	80.6934	1.72061
FAAH	8	8:21699927-21708817:-1	fatty acid amide hydrolase	90.7668	52.8074	1.71883
NCF4	1	1:51610637-51620775:-1	neutrophil cytosolic factor 4, 40kDa	23.6092	13.7415	1.71809
LOC100859467	.	.	ras GTPase-activating protein 1-like	2.798	1.62882	1.71781
LOC101747844	.	.	carbohydrate sulfotransferase 9-like	12.0993	7.04595	1.7172
CRISPLD2	11	11:17142610-17163354:+1	cysteine-rich secretory protein LCCL domain containing 2	4.30483	2.50745	1.71681
ENSGALG00000045555	8	8:10398596-10414923:+1		7.91317	4.61073	1.71625
PAMR1	5	5:19101383-19157636:-1	peptidase domain containing associated with muscle regeneration 1	2.1025	1.22568	1.71537
ADCY2	2	2:79496841-79702592:-1	adenylate cyclase 2 (brain)	2.80183	1.63518	1.71347
LOC107051328	.	.	SH3 domain-containing protein C23A1.17-like	10.6565	6.22073	1.71306
ENSGALG00000039902	KQ759336.1	KQ759336.1:20470-26929:-1		5.20533	3.04041	1.71205
DDEFL1	.	.	development and differentiation enhancing factor-like 1	9.615	5.61923	1.71109
LOC418554	.	.	V-set domain containing T cell activation inhibitor 1-like	15.3465	8.9695	1.71096
SPINW	W	W:4303239-4411443:-1	spindlin 1	3.23117	1.88882	1.71068
OPRL1	20	20:9451587-9464080:-1	opioid related nociceptin receptor 1	1.02783	0.601273	1.70943
CXCR4	7	7:30913614-30916302:-1	C-X-C motif chemokine receptor 4	87.0788	51.0046	1.70727
ENSGALG00000035957	AADN04019139.1	AADN04019139.1:21-2171:-1		11.1637	6.544	1.70594
SPRY1	4	4:53714525-53715490:-1	sprouty RTK signaling antagonist 1	13.5933	7.97627	1.70422
LPAR5	1	1:77027981-77029234:-1	lysophosphatidic acid receptor 5	7.62533	4.47495	1.704
ADRA1B	13	13:7992487-8008603:-1	adrenoceptor alpha 1B	11.7177	6.88073	1.70297
ENSGALG00000034464	AADN04007672.1	AADN04007672.1:26-9838:-1		1.61367	0.948273	1.70169
ENSGALG00000029410	27	27:4778442-4778630:-1		1.41017	0.828909	1.70123
ENSGALG00000034278	15	15:6678850-6689710:-1		6.974	4.10336	1.69958
LOC374195	.	.	chromodomain helicase DNA binding protein 1	1.385	0.815773	1.69778
LOC107055384	.	.	immunoglobulin superfamily member 1-like	1.06983	0.630273	1.69741
GPR183	1	1:144596844-144597920:+1	G protein-coupled receptor 183	48.2538	28.4327	1.69713
FOSL2	3	3:27455227-27465411:-1	Fos-related antigen 2	29.971	17.687	1.69452
ENSGALG00000040175	AADN04006622.1	AADN04006622.1:1791-4184:-1		64.7397	38.22	1.69387
FGF10	Z	Z:13974782-14032655:-1	fibroblast growth factor 10	19.4703	11.503	1.69262
TNFAIP8L1	28	28:4954941-4961602:-1	TNF alpha induced protein 8 like 1	54.2898	32.0893	1.69184
CALN1	19	19:939567-1038785:+1	calneuron 1	2.42033	1.43114	1.6912
ENSGALG00000014794	1	1:79119339-79141165:+1		4.4535	2.63473	1.69031
ENSGALG00000004885	10	10:10039455-10047425:+1	solute carrier family 24, member 5 precursor	3.66333	2.16923	1.68877
ENSGALG00000046198	1	1:48163227-48163920:-1		3.41917	2.02709	1.68674
ENSGALG00000037032	AADN04008653.1	AADN04008653.1:7591-7923:-1		18.7518	11.118	1.68663
LOC422002	.	.	GTPase SLIP-GC-like	5.62783	3.3395	1.68523
FCHO1	.	.	FCH domain only 1	19.8692	11.7938	1.68472
LOC107051647	.	.	golgin subfamily A member 6-like protein 22	1.46317	0.869227	1.6833
ENSGALG00000031299	1	1:145124528-145133847:-1		2.478	1.47218	1.68322
LOC427010	.	.	zinc finger RNA-binding protein-like	1.89517	1.12691	1.68174
ENSGALG00000009610	6	6:31462583-31464149:+1		4.07733	2.42486	1.68147
ARL14	9	9:22196074-22196658:+1	ADP ribosylation factor like GTPase 14	2.15167	1.27968	1.68141
LOC101749876	.	.	ADP-ribosylation factor-like protein 14-like	2.15167	1.27968	1.68141
ENSGALG00000037342	AADN04001167.1	AADN04001167.1:2461-11161:+1		1.91233	1.13782	1.6807
ENSGALG00000043795	AADN04011059.1	AADN04011059.1:914-8142:+1		1.74183	1.03682	1.67998
ENSGALG00000031166	10	10:3442683-3476186:-1		1.534	0.914409	1.67759
ENSGALG00000040403	AADN04012098.1	AADN04012098.1:2563-3153:-1		2.51333	1.49832	1.67744
LOC101750341	.	.	uncharacterized LOC101750341	1.46317	0.872409	1.67716
ENSGALG00000012965	2	2:76506833-76530777:-1		29.0018	17.3011	1.6763
ENSGALG00000045189	9	9:15386014-15387083:+1		1.02517	0.611773	1.67573
LRRC17	1	1:12869754-12885148:+1	leucine rich repeat containing 17	31.3603	18.7301	1.67433
CACNG7	AADN04008330.1	AADN04008330.1:656-8497:+1	calcium voltage-gated channel auxiliary subunit gamma 7	1.40083	0.837182	1.67327
ENSGALG00000032371	AADN04002495.1	AADN04002495.1:10781-12209:+1		3.90267	2.334	1.67209
PAG1	2	2:121738030-121812585:-1	phosphoprotein membrane anchor with glycosphingolipid microdomains 1	30.1342	18.029	1.67143
FBP1	Z	Z:41447669-41457345:-1	fructose-bisphosphatase 1	75.5615	45.2115	1.67129
ENSGALG00000045925	1	1:110346977-110376641:-1		13.0265	7.79564	1.671
LOC101751363	.	.	SEC14-like protein 2-like	10.1587	6.08336	1.66991
HAVCR1	.	.	hepatitis A virus cellular receptor 1	7.1095	4.25873	1.6694
ATP6V0A4	1	1:56383284-56408305:+1	ATPase, H+ transporting, lysosomal V0 subunit a4	3.03217	1.8165	1.66924
SELENOP	Z	Z:13589417-13595463:-1	selenoprotein P	1496.61	897.121	1.66823
ENSGALG00000043696	AADN04014239.1	AADN04014239.1:48-6213:-1		21.0443	12.6322	1.66592
ODF2L	8	8:16057748-16074923:+1	outer dense fiber of sperm tails 2-like	3.21767	1.9315	1.66589
ENSGALG00000038064	W	W:3638591-3787595:+1		2.01667	1.21259	1.66311
ENSGALG00000035118	W	W:99100-170596:+1		2.3075	1.38864	1.6617
UBE2R2L	.	.	ubiquitin-conjugating enzyme E2 R2-like	2.3075	1.38864	1.6617
LOC107051858	.	.	uncharacterized LOC107051858	4.76383	2.86805	1.661
ENSGALG00000015056	2	2:103493136-103529171:+1		12.1628	7.32586	1.66026
GJC2	2	2:2340128-2346805:-1	gap junction protein gamma 2	7.534	4.53891	1.65987
CD180	Z	Z:21298861-21305055:-1	CD180 molecule	10.09	6.08095	1.65928
SRC	.	.	v-src avian sarcoma (Schmidt-Ruppin A-2) viral oncogene homolog	9.88383	5.96332	1.65744
LOC107049501	.	.	astrocytic phosphoprotein PEA-15-like	4.99167	3.01395	1.65619
ENSGALG00000032355	4	4:43231525-43231782:+1		1.76733	1.06764	1.65537
ENSGALG00000043613	5	5:58297861-58316443:-1		1.294	0.781864	1.65502
ENSGALG00000045556	AADN04000971.1	AADN04000971.1:22164-24536:+1		1.98183	1.19777	1.6546
GNG4	3	3:38148554-38161698:+1	G protein subunit gamma 4	2.98783	1.80632	1.6541
ENSGALG00000046435	Z	Z:77384746-77386461:+1		6.68717	4.04318	1.65394
LOC107056986	.	.	ankyrin repeat and KH domain-containing protein 1-like	2.23667	1.35241	1.65384
LOC107049695	.	.	platelet glycoprotein VI-like	5.41767	3.27764	1.65292
TREM-B2	.	.	triggering receptor expressed on myeloid cells B2	6.11217	3.69918	1.6523
KIAA1147	1	1:57369059-57379716:-1	KIAA1147	14.3545	8.69386	1.65111
ANXA8	.	.	annexin A8	1.97767	1.19873	1.64981
ENSGALG00000023506	3	3:16420760-16425137:-1		4.1375	2.50836	1.64948
LOC107056419	.	.	endogenous retrovirus group K member 18 Pol protein-like	15.4958	9.39845	1.64876
ENSGALG00000035998	AADN04002813.1	AADN04002813.1:1981-16449:-1		24.5367	14.8833	1.64861
ENSGALG00000029329	4	4:9103122-9104464:-1		1.31417	0.797955	1.64692
FHL5	3	3:73034632-73062348:-1	four and a half LIM domains 5	8.08867	4.91232	1.64661
TPPP	2	2:55779638-55828976:+1	tubulin polymerization promoting protein	1.40767	0.855545	1.64534
ENSGALG00000038550	AADN04002066.1	AADN04002066.1:5014-13697:+1		3.63233	2.21036	1.64332
ENSGALG00000043130	AADN04001700.1	AADN04001700.1:2912-11589:+1		7.26483	4.42091	1.64329
BMF	5	5:29410988-29430989:+1	Bcl2 modifying factor	26.3268	16.0244	1.64292
ENSGALG00000040263	W	W:2000281-2003728:+1		33.4157	20.3478	1.64222
FAM105A	.	.	family with sequence similarity 105, member A	36.3297	22.1567	1.63967
RHPN1	.	.	rhophilin, Rho GTPase binding protein 1	4.3245	2.63809	1.63925
CYFIP2	13	13:11367959-11407960:-1	cytoplasmic FMR1 interacting protein 2	2.12517	1.29695	1.63858
LOC107049482	.	.	thioredoxin-like protein 1	4.46917	2.72759	1.6385
SLC40A1	7	7:353851-368636:+1	solute carrier family 40 (iron-regulated transporter), member 1	152.532	93.1175	1.63806
ENSGALG00000043276	AADN04015762.1	AADN04015762.1:510-3885:+1		1.41367	0.863455	1.63722
LOC420807	.	.	uncharacterized LOC420807	1.00933	0.617	1.63587
Wpkci-8	AADN04000843.1	AADN04000843.1:16486-47731:-1	Gallus gallus histidine triad nucleotide binding protein W (HINTW), mRNA.	110.49	67.5547	1.63557
ENSGALG00000029783	AADN04024629.1	AADN04024629.1:4523-14980:+1		14.4193	8.81768	1.63527
ENSGALG00000030666	KQ759365.1	KQ759365.1:30346-45877:-1		33.7792	20.675	1.63382
LOC100857620	.	.	LIM and senescent cell antigen-like-containing domain protein 1-like	5.1135	3.13045	1.63347
ENSGALG00000029780	KQ759405.1	KQ759405.1:143937-145724:-1		6.5305	4.001	1.63222
CAMK1D	1	1:6522549-6602832:+1	calcium/calmodulin-dependent protein kinase ID	17.2062	10.5504	1.63085
SPRY2	1	1:152670026-152675345:+1	sprouty RTK signaling antagonist 2	2.06417	1.266	1.63046
PRDM10	.	.	PR domain containing 10	16.8172	10.329	1.62814
LOC100859779	.	.	transitional endoplasmic reticulum ATPase-like	23.2993	14.3126	1.62789
IPCEF1	3	3:50228502-50262908:-1	interaction protein for cytohesin exchange factors 1	9.47133	5.82173	1.62689
LOC107049306	.	.	ras GTPase-activating protein 1-like	2.57433	1.5825	1.62675
PLEKHO1	25	25:124309-139874:+1	pleckstrin homology domain containing O1	60.6538	37.2933	1.6264
TLR2A	4	4:20184996-20199647:+1	toll-like receptor 2 type-1 precursor	84.5287	51.9753	1.62632
TSPAN15	6	6:10919212-10930743:+1	tetraspanin 15	29.4013	18.086	1.62564
THBS2	3	3:41483185-41514674:+1	thrombospondin 2	132.516	81.629	1.62339
ENSGALG00000009796	3	3:21668157-21696656:-1		4.5255	2.78818	1.6231
C1QTNF6	1	1:51475822-51477420:+1	C1q and TNF related 6	5.57883	3.43736	1.623
SSBP2	Z	Z:63521716-63687448:+1	single-stranded DNA binding protein 2	2.8065	1.7305	1.62179
LGALS2	1	1:51250968-51253146:+1	lectin, galactoside-binding, soluble, 2	31.9497	19.7202	1.62015
ENSGALG00000036395	27	27:181409-221892:-1		1.00317	0.619591	1.61908
HS3ST5	3	3:64739075-64934511:+1	heparan sulfate-glucosamine 3-sulfotransferase 5	1.2405	0.766545	1.6183
LOC107056374	.	.	zinc finger and BTB domain-containing protein 49-like	2.10067	1.29964	1.61635
LOC107051220	.	.	peroxisomal membrane protein 11B-like	5.97233	3.69527	1.61621
ENSGALG00000014261	4	4:69068033-69072673:-1		18.5747	11.4933	1.61613
LOC107057220	.	.	transmembrane protein 120A-like	3.274	2.02586	1.6161
FABP4	2	2:121975264-121978486:-1	fatty acid binding protein 4	1617.67	1001.81	1.61474
ENSGALG00000007840	15	15:10863851-10872814:-1		4.56767	2.83359	1.61197
LOC428586	.	.	mitogen-activated protein kinase kinase kinase MLK4-like	3.0445	1.88982	1.611
ACBD5	.	.	acyl-CoA binding domain containing 5	2.45867	1.52623	1.61094
LOC107057099	.	.	zinc finger protein 501-like	2.663	1.65332	1.6107
MCTP1	Z	Z:57623925-57794587:+1	multiple C2 domains, transmembrane 1	1.04067	0.646318	1.61015
LOC107051288	.	.	mucin-5AC-like	8.689	5.39759	1.60979
SMOX	4	4:88971253-89015690:-1	spermine oxidase	10.6657	6.62732	1.60935
DUSP1	13	13:9052099-9054704:-1	dual specificity phosphatase 1	13.3877	8.32191	1.60873
ENSGALG00000039214	3	3:24652522-24668915:-1		4.89367	3.04614	1.60652
SH3BGRL2	3	3:79624482-79659456:-1	SH3 domain binding glutamic acid-rich protein like 2	1.2775	0.795591	1.60572
NAV3	1	1:38668218-38924294:+1	neuron navigator 3	5.4605	3.40236	1.60491
ENSGALG00000005094	14	14:5192894-5196760:-1		12.6122	7.85968	1.60467
ENSGALG00000036872	AADN04004668.1	AADN04004668.1:7791-9052:-1		11.4492	7.139	1.60375
YPEL1	15	15:555264-562933:+1	yippee like 1	117.051	72.9896	1.60367
HMCES	12	12:9123022-9126022:+1	5-hydroxymethylcytosine binding, ES cell specific	23.3867	14.5841	1.60357
ALAD	17	17:1938858-1947767:+1	aminolevulinate dehydratase	13.281	8.28482	1.60305
JAG1	3	3:13514076-13530910:+1	jagged 1	6.0805	3.79386	1.60272
LOC107056155	.	.	androglobin-like	1.40983	0.879818	1.60241
LOC770025	.	.	ribosomal protein L17	10.8138	6.75068	1.60189
ENSGALG00000030998	AADN04000732.1	AADN04000732.1:6439-9395:+1		8.4185	5.26241	1.59974
MMP7	1	1:182581300-182585639:+1	matrilysin precursor	744.984	465.977	1.59876
ENSGALG00000039084	19	19:9048010-9051562:+1		33.7285	21.128	1.59639
ENSGALG00000011579	3	3:45611995-45623882:-1		2.016	1.26291	1.59631
LOC421584	.	.	solute carrier family 22 member 2-like	2.016	1.26291	1.59631
MLXIPL	19	19:169275-184322:-1	MLX interacting protein-like	4.08617	2.56318	1.59418
ENSGALG00000017228	1	1:186280285-186300517:-1		1.927	1.20968	1.59298
LOC770126	.	.	uncharacterized LOC770126	135.147	84.9058	1.59173
ENSGALG00000039866	AADN04002433.1	AADN04002433.1:5012-5904:-1		15.3613	9.65341	1.59129
LOC107056816	.	.	ubiquitin-like protein 7	7.24367	4.55986	1.58857
ATP5A1W	.	.	ATP synthase subunit alpha	7.00483	4.4185	1.58534
CACNA2D1	1	1:10220631-10584619:+1	calcium channel, voltage-dependent, alpha 2/delta subunit 1 preproprotein	3.5905	2.26645	1.58419
SMG8	.	.	SMG8 nonsense mediated mRNA decay factor	2.83283	1.78832	1.58408
CCLi8	19	19:4780024-4781242:-1		16.544	10.445	1.58392
CCLI8	.	.	chemokine	16.544	10.445	1.58392
ENSGALG00000045406	AADN04002348.1	AADN04002348.1:3503-5659:-1		13.9202	8.80023	1.5818
SLIT2	4	4:75487239-75766552:-1	slit guidance ligand 2	2.63083	1.66341	1.58159
ENSGALG00000030214	AADN04001960.1	AADN04001960.1:10406-16523:+1		1.78833	1.13095	1.58126
ENSGALG00000039636	1	1:60007870-60009501:+1		2.1215	1.34305	1.57962
ENSGALG00000023122	4	4:52134776-52136779:-1		38.014	24.0928	1.57781
ENSGALG00000036617	AADN04001080.1	AADN04001080.1:26849-27141:-1		2.273	1.44109	1.57728
ENSGALG00000010219	8	8:21007876-21011979:+1		3.29767	2.09118	1.57694
MAP3K21	3	3:38936960-38976102:-1	mitogen-activated protein kinase kinase kinase 21	2.46917	1.56695	1.57577
GCHFR	5	5:960109-967796:+1	GTP cyclohydrolase I feedback regulator	82.8692	52.596	1.57558
CREB1	.	.	cAMP responsive element binding protein 1	8.5665	5.43955	1.57486
ENSGALG00000032502	5	5:12505456-12511344:-1		2.41783	1.5355	1.57462
ENSGALG00000006516	10	10:12641937-12663041:+1		6.756	4.29432	1.57324
ENSGALG00000002783	19	19:5308463-5317811:-1		28.5963	18.1778	1.57314
LOC429518	.	.	dedicator of cytokinesis protein 2-like	10.448	6.64323	1.57273
PAX6	5	5:5201971-5218801:-1	paired box 6	2.00117	1.27259	1.57251
LOC107056737	.	.	phosphatidylinositol 3,4,5-trisphosphate 5-phosphatase 1-like	68.3567	43.4712	1.57246
DENND2D	26	26:1020205-1027765:+1	DENN/MADD domain containing 2D	2.83733	1.808	1.56932
C2orf66	7	7:10030005-10033873:-1	chromosome 2 open reading frame 66	1.33117	0.848364	1.5691
C7H2ORF66	.	.	chromosome 7 open reading frame, human C2orf66	1.33117	0.848364	1.5691
INPP5D	9	9:1130716-1154017:+1	inositol polyphosphate-5-phosphatase, 145kDa	46.8645	29.8703	1.56893
ENSGALG00000032803	AADN04000612.1	AADN04000612.1:83173-84675:-1		2.389	1.52332	1.56829
LOC776507	.	.	proto-oncogene Mas-like	2.389	1.52332	1.56829
ENSGALG00000033649	AADN04007907.1	AADN04007907.1:10109-10376:+1		2.79167	1.78364	1.56515
PRCP	1	1:189067272-189093580:-1	prolylcarboxypeptidase	145.515	93.0228	1.5643
ENSGALG00000000123	16	16:134466-137899:-1		1.30383	0.833545	1.5642
PLCB2	5	5:622099-658176:-1	phospholipase C, beta 2	18.4132	11.772	1.56416
LY86	2	2:65108627-65132418:-1	lymphocyte antigen 86	4623.35	2957.49	1.56327
CYP4V2	4	4:61746761-61759707:+1	cytochrome P450 family 4 subfamily V member 2	43.4593	27.8062	1.56294
ASXL3	2	2:107248918-107350660:+1	additional sex combs like transcriptional regulator 3	1.92617	1.23245	1.56287
ENSGALG00000009628	4	4:11436464-11437348:+1		9.04167	5.78577	1.56274
LOC101749344	.	.	uncharacterized LOC101749344	1.1805	0.755773	1.56198
LOC101750842	.	.	uncharacterized LOC101750842	11.5612	7.404	1.56148
ENSGALG00000041142	AADN04021346.1	AADN04021346.1:21-2456:-1		6.75967	4.32932	1.56137
ANKRD2	6	6:22313737-22316507:-1	ankyrin repeat domain 2 (stretch responsive muscle)	2.23983	1.43541	1.56041
EPGN	4	4:45019071-45027787:+1	epithelial mitogen	1.09117	0.6995	1.55992
ENSGALG00000043377	AADN04001035.1	AADN04001035.1:1532-3013:-1		58.2575	37.37	1.55894
SNX20	11	11:6298048-6308951:+1	sorting nexin 20	7.70933	4.94673	1.55847
LICOS	1	1:110383415-110393891:-1		41.373	26.548	1.55842
ENSGALG00000010699	2	2:24805292-24815118:+1		2.09267	1.34295	1.55826
ENSGALG00000041095	AADN04009790.1	AADN04009790.1:3751-7884:-1		6.05467	3.88664	1.55782
ENSGALG00000032450	AADN04011602.1	AADN04011602.1:21-2319:+1		1.56767	1.00709	1.55663
LOC107055361	.	.	early endosome antigen 1-like	24.9352	16.02	1.5565
IL8	4	4:51283110-51286274:+1	Interleukin-8	144.761	93.0045	1.55649
LOC107051329	.	.	medium-wave-sensitive opsin 1-like	1.92367	1.236	1.55636
PKIB	3	3:61397818-61403187:-1	protein kinase (cAMP-dependent, catalytic) inhibitor beta	124.158	79.8054	1.55576
PPP1R27	18	18:10006827-10008386:-1	protein phosphatase 1 regulatory subunit 27	1.42383	0.915227	1.55572
ENSGALG00000010156	Z	Z:25783101-25805188:+1		9.36333	6.01932	1.55555
AGBL4	8	8:22774073-23612126:-1	ATP/GTP binding protein-like 4	7.9845	5.13418	1.55517
ENSGALG00000029213	AADN04004393.1	AADN04004393.1:4276-9158:+1		3.1235	2.00873	1.55496
ENSGALG00000039952	3	3:104909426-104909674:-1		2.35067	1.51195	1.55472
ENSGALG00000013209	2	2:88862596-88873438:-1		2.64967	1.70473	1.55431
ENSGALG00000005682	10	10:10659090-10666030:+1		3.99067	2.56791	1.55405
ENSGALG00000001709	12	12:849847-853113:-1	Musculoskeletal embryonic nuclear protein 1	5.8565	3.77077	1.55313
ADAM12	6	6:32619954-32790667:-1	ADAM metallopeptidase domain 12	10.9222	7.03414	1.55274
PTPN6	1	1:77339324-77348760:+1	protein tyrosine phosphatase, non-receptor type 6	153.415	98.8345	1.55225
GLI3	2	2:50875914-51069730:-1	GLI family zinc finger 3	3.31767	2.13855	1.55137
SPDL1	13	13:4125933-4144612:-1	spindle apparatus coiled-coil protein 1	51.0042	32.8828	1.55109
ENSGALG00000005572	14	14:6193969-6197292:-1		1.85567	1.19636	1.55109
NOXO1	.	.	NADPH oxidase organizer 1	1.85567	1.19636	1.55109
ENSGALG00000035652	1	1:169944440-169944694:-1		11.5283	7.43245	1.55108
CATHL1	2	2:4024913-4026402:-1	Cathelicidin-1	1.0965	0.707045	1.55082
ENSGALG00000045408	AADN04001868.1	AADN04001868.1:14451-15407:+1		1.63167	1.05236	1.55048
PACS1	3	3:4344187-4358714:+1	phosphofurin acidic cluster sorting protein 1	6.15483	3.97227	1.54945
XKR6	3	3:107399210-107546498:-1	XK related 6	1.95	1.25927	1.54851
DFNB59	7	7:15472739-15481395:-1	deafness, autosomal recessive 59	10.5458	6.8115	1.54824
C8orf4	22	22:2509377-2510527:+1	chromosome 8 open reading frame 4	7.58133	4.89777	1.54791
ENSGALG00000014978	Z	Z:23461599-23577675:-1		31.8965	20.608	1.54777
DAPP1	4	4:60487514-60509520:+1	dual adaptor of phosphotyrosine and 3-phosphoinositides	12.2147	7.89205	1.54772
ENSGALG00000044909	KQ759566.1	KQ759566.1:4207-4692:+1		1.14567	0.740318	1.54753
ENSGALG00000010836	2	2:28805158-28878615:+1		20.8248	13.465	1.54658
ENSGALG00000039008	11	11:17272625-17275974:+1		7.62967	4.93355	1.54649
ENSGALG00000044066	AADN04007185.1	AADN04007185.1:5238-7661:-1		20.327	13.1588	1.54474
GJA1	3	3:61930601-61938188:-1	gap junction protein alpha 1	297.876	192.895	1.54424
ENSGALG00000031015	KQ759490.1	KQ759490.1:26121-39622:+1		1.40633	0.910955	1.5438
NXNL1	AADN04000659.1	AADN04000659.1:71114-73006:+1	nucleoredoxin-like 1	1.752	1.135	1.54361
SIAT9	4	4:85969310-85990133:-1	ST3 beta-galactoside alpha-2,3-sialyltransferase 5	2.2225	1.44145	1.54185
ENSGALG00000011544	1	1:71724526-71731735:+1		3.26217	2.11582	1.5418
MPC1	3	3:42972100-42981391:+1	mitochondrial pyruvate carrier 1	566.249	367.275	1.54176
BCL11A	3	3:1854198-1913151:-1	B-cell CLL/lymphoma 11A (zinc finger protein)	2.31983	1.50486	1.54156
LOC107052555	.	.	interferon regulatory factor 5-like	2.16633	1.40532	1.54153
LOC415661	.	.	uncharacterized oxidoreductase-like	13.8897	9.01536	1.54067
ENSGALG00000021451	11	11:1103753-1106406:-1		27.7788	18.0309	1.54062
SCD5	4	4:46679985-46697729:+1	stearoyl-CoA desaturase 5	8.333	5.40905	1.54057
ENSGALG00000041298	14	14:15017286-15034742:+1		11.9875	7.78127	1.54056
ENSGALG00000021314	14	14:838542-848893:-1		8.73167	5.67236	1.53933
ENSGALG00000008457	3	3:4168390-4183006:+1		14.8748	9.66714	1.5387
ENSGALG00000035944	AADN04003011.1	AADN04003011.1:11123-17296:-1		1.057	0.687227	1.53806
SCARF1	.	.	scavenger receptor class F, member 1	32.2362	20.9814	1.53642
AGPAT9	.	.	1-acylglycerol-3-phosphate O-acyltransferase 9	1.30517	0.851	1.53369
TTYH3	14	14:3249590-3315833:-1	tweety homolog 3 (Drosophila)	29.8672	19.4968	1.5319
FLI1	24	24:988812-1059723:+1	Fli-1 proto-oncogene, ETS transcription factor	36.8513	24.0625	1.53149
TMEM206	3	3:21897361-21979249:+1	transmembrane protein 206	43.4907	28.4057	1.53105
ENSGALG00000006318	14	14:7350388-7363147:+1		1.0565	0.690682	1.52965
SYK	Z	Z:44064049-44115933:+1	spleen associated tyrosine kinase	17.327	11.3282	1.52954
LOC101748203	.	.	GRAM domain-containing protein 3-like	1.63833	1.07141	1.52914
RGS18	8	8:3658171-3666375:-1	regulator of G protein signaling 18	57.5192	37.6493	1.52776
SPINK2	.	.	serine peptidase inhibitor, Kazal type 2 (acrosin-trypsin inhibitor)	13.7708	9.01391	1.52773
ARHGEF37	13	13:8425824-8435377:-1	Rho guanine nucleotide exchange factor (GEF) 37	2.45433	1.60673	1.52754
LOC423719	.	.	proactivator polypeptide-like	1.85717	1.21586	1.52745
C17orf75	18	18:6801943-6805493:-1	chromosome 17 open reading frame 75	14.916	9.77209	1.52639
LY96	2	2:118468953-118475495:+1	lymphocyte antigen 96	145.394	95.27	1.52612
FKBP1A	.	.	FK506 binding protein 1A, 12kDa	214.624	140.662	1.52581
LOC776173	.	.	arf-GAP with coiled-coil, ANK repeat and PH domain-containing protein 1-like	2.679	1.757	1.52476
LOC107056846	.	.	telomeric repeat-binding factor 2-like	1.22917	0.806227	1.52459
LOC422513	.	.	hect domain and RLD 4-like	6.80233	4.46182	1.52457
ENSGALG00000043890	2	2:45417974-45418868:+1		1.58583	1.04095	1.52344
ENSGALG00000014164	1	1:68563259-68575275:+1		4.05917	2.66459	1.52337
C10orf54	.	.	chromosome 6 open reading frame, human C10orf54	28.7005	18.8473	1.52279
NME5	13	13:14317513-14326849:+1	NME/NM23 family member 5	16.8802	11.0875	1.52244
TBC1D8	1	1:133434844-133489335:-1	TBC1 domain family, member 8 (with GRAM domain)	3.7635	2.47605	1.51996
ABCA1	Z	Z:54725868-54817218:-1	ATP binding cassette subfamily A member 1	83.1555	54.7335	1.51928
CDKN2A	Z	Z:78627025-78636973:-1		21.2308	13.9751	1.51919
ENSGALG00000027056	1	1:59476229-59483268:-1		1.63733	1.07791	1.51899
ENSGALG00000041909	33	33:1607020-1608482:-1		1.41333	0.930636	1.51867
ENSGALG00000026970	5	5:1549219-1550524:+1		106.558	70.179	1.51837
LOC770612	.	.	interferon-induced transmembrane protein 1-like	106.558	70.179	1.51837
TMPO	.	.	thymopoietin	17.3957	11.4569	1.51836
RPS6KA1	.	.	ribosomal protein S6 kinase, 90kDa, polypeptide 1	25.2152	16.6098	1.51809
ENSGALG00000007203	5	5:16802946-16816245:-1		33.1995	21.8716	1.51792
ANKRD44	7	7:10074592-10185212:-1	ankyrin repeat domain 44	15.3127	10.088	1.51791
ENSGALG00000046521	26	26:200980-204453:+1		4.64833	3.06391	1.51713
TMEM139	.	.	transmembrane protein 139	5.39733	3.55764	1.51711
TUBB1	20	20:11089454-11094495:-1	tubulin beta 1 class VI	16.9963	11.2034	1.51707
ENSGALG00000028247	10	10:2257373-2265204:+1		77.1267	50.8665	1.51626
CMTM3	11	11:11584764-11595252:-1	CKLF like MARVEL transmembrane domain containing 3	142.891	94.2438	1.51618
NOX3	3	3:50785550-50822797:-1	NADPH oxidase 3	2.98517	1.96941	1.51577
LOC107056108	.	.	rho-related GTP-binding protein RhoU-like	1.478	0.975364	1.51533
ENSGALG00000043671	AADN04003124.1	AADN04003124.1:6503-12619:+1		9.48017	6.25664	1.51522
CD200R1L	1	1:83409648-83412396:+1	CD200 receptor 1-like	7.04517	4.65382	1.51385
EPHA3	1	1:89165149-89382603:+1	EPH receptor A3	13.432	8.87582	1.51333
CHRNB2	25	25:1729683-1734477:+1	cholinergic receptor nicotinic beta 2 subunit	1.465	0.968182	1.51315
CYP26B1	.	.	cytochrome P450, family 26, subfamily B, polypeptide 1	2.766	1.828	1.51313
ENSGALG00000040518	AADN04002587.1	AADN04002587.1:7354-7686:-1		7.369	4.87123	1.51276
SIPA1L2	3	3:39308418-39412374:+1	signal-induced proliferation-associated 1 like 2	8.38367	5.54264	1.51258
C1QTNF8	14	14:5617810-5620433:+1	C1q and tumor necrosis factor related protein 8	4.707	3.11255	1.51227
ENSGALG00000039407	AADN04024259.1	AADN04024259.1:1-515:+1		105.518	69.8317	1.51103
LAMTOR5	.	.	late endosomal/lysosomal adaptor, MAPK and MTOR activator 5	1.94683	1.28905	1.51029
FGD4	1	1:59021804-59039816:-1	FYVE, RhoGEF and PH domain containing 4	15.1053	10.0058	1.50965
ENSGALG00000040433	1	1:185882688-185922235:-1		1.59183	1.05605	1.50735
SLA	2	2:141942883-141963481:-1	Src like adaptor	33.2515	22.0655	1.50695
LOC415664	.	.	uncharacterized oxidoreductase-like	1.06733	0.709182	1.50502
TRPM1	10	10:5621877-5662732:+1	transient receptor potential cation channel, subfamily M, member 1	34.7333	23.081	1.50484
ENSGALG00000037319	AADN04002779.1	AADN04002779.1:3672-5955:-1		2.38967	1.58823	1.50461
C3AR1	1	1:66846831-66850139:+1	complement C3a receptor 1	213.442	141.93	1.50385
KSR1	19	19:9192199-9230027:+1	kinase suppressor of ras 1	12.5238	8.32945	1.50356
RFTN2	7	7:10267651-10296410:-1	raftlin family member 2	87.4923	58.2544	1.5019
ENSGALG00000045857	Z	Z:77061536-77063696:+1		1.44883	0.965136	1.50117
LOC107056007	.	.	lysophosphatidylcholine acyltransferase 1-like	0.702333	1.054	0.66635
ANPEP	10	10:19886093-20028017:-1	alanyl aminopeptidase, membrane	45.378	68.1008	0.666336
SGCA	AADN04002558.1	AADN04002558.1:11945-19433:+1	sarcoglycan, alpha (50kDa dystrophin-associated glycoprotein)	0.977167	1.46673	0.666222
ENSGALG00000042020	4	4:50050413-50052876:+1	16 kDa beta-galactoside-binding lectin	19.556	29.3551	0.666187
ENSGALG00000038286	10	10:9130595-9137593:+1		0.6895	1.03586	0.665628
ENSGALG00000043720	AADN04007005.1	AADN04007005.1:9714-9893:-1		11.3873	17.1083	0.665604
CPAMD8	28	28:4229272-4253848:+1	C3 and PZP-like, alpha-2-macroglobulin domain containing 8	2.87467	4.3195	0.665509
ST3GAL1	2	2:142197114-142221622:-1	CMP-N-acetylneuraminate-beta-galactosamide-alpha-2,3-sialyltransferase 1	22.1728	33.3172	0.665507
CPQ	2	2:127544122-127708621:+1	carboxypeptidase Q	12.0887	18.1775	0.665036
PELI2	5	5:56087033-56150956:-1	pellino E3 ubiquitin protein ligase family member 2	2.67767	4.02677	0.664966
GYG2	.	.	glycogenin 2	1.2465	1.87468	0.664913
JAM3	24	24:2491132-2515882:+1	junctional adhesion molecule 3	14.9967	22.5627	0.664666
LOC100858953	.	.	uncharacterized LOC100858953	1.06017	1.59573	0.664378
ENSGALG00000034100	10	10:19632491-19663602:-1		10.528	15.8515	0.664166
IGSF11	1	1:80838584-80925257:+1	immunoglobulin superfamily, member 11	0.788	1.18791	0.66335
GLT1D1	15	15:3736274-3781857:-1	glycosyltransferase 1 domain containing 1	2.65733	4.00655	0.663248
SLC12A5	20	20:10778501-10801878:+1	solute carrier family 12 (potassium/chloride transporter), member 5	5.47983	8.28636	0.661307
RNF19B	.	.	ring finger protein 19B	3.66283	5.54118	0.66102
SEMA6D	10	10:9898756-9911145:+1	sema domain, transmembrane domain (TM), and cytoplasmic domain, (semaphorin) 6D	5.90467	8.9395	0.660514
ENSGALG00000032820	AADN04009644.1	AADN04009644.1:5336-6768:+1		1.85517	2.81077	0.66002
LOC100859584	.	.	GAS2-like protein 1-like	0.986	1.49441	0.659793
ENSGALG00000010926	4	4:45974555-45977750:-1		1599.4	2426.06	0.659256
GPER1	14	14:2354794-2358320:+1	G protein-coupled estrogen receptor 1	21.7357	32.994	0.658775
ENSGALG00000016026	4	4:89648215-89652544:-1		42.9342	65.1865	0.658635
ENSGALG00000034578	AADN04021554.1	AADN04021554.1:59-2404:+1		1.66567	2.52923	0.658567
ADAMTS14	6	6:11545754-11563815:+1	ADAM metallopeptidase with thrombospondin type 1 motif, 14	2.09967	3.18891	0.658428
ENSGALG00000044874	2	2:3910767-3914755:+1		1.03317	1.56927	0.658373
C11orf74	5	5:19521772-19561907:+1	chromosome 11 open reading frame 74	1.28933	1.95864	0.658281
PXDN	3	3:93289305-93363465:-1	peroxidasin homolog (Drosophila)	10.3055	15.6552	0.65828
STARD13	.	.	StAR-related lipid transfer (START) domain containing 13	4.529	6.88464	0.657842
ENSGALG00000030377	26	26:4904776-4905638:+1		4.05717	6.17005	0.657559
GREM1	5	5:30579487-30580185:-1	gremlin 1, DAN family BMP antagonist	21.5902	32.854	0.657154
LZTFL1	.	.	leucine zipper transcription factor-like 1	6.469	9.85005	0.656748
IRX3	11	11:4648344-4649811:+1	iroquois homeobox 3	0.9995	1.5225	0.656486
PSD3	Z	Z:54574433-54695402:-1	pleckstrin and Sec7 domain containing 3	11.3553	17.3005	0.65636
CHST2	.	.	carbohydrate (N-acetylglucosamine-6-O) sulfotransferase 2	1.5875	2.41891	0.656288
C7orf50	14	14:2277633-2300490:-1	chromosome 14 open reading frame, human C7orf50	8.2185	12.5246	0.656187
PDGFD	1	1:181945830-182085856:+1	platelet derived growth factor D	3.98167	6.06818	0.656155
THBD	3	3:3336992-3338641:+1	thrombomodulin	2.63083	4.00973	0.656113
VNN1	.	.	vanin 1	2.14233	3.26991	0.655166
SH2D1B	1	1:87603283-87613437:-1	SH2 domain containing 1B	7.20183	10.9944	0.655048
CERCAM	17	17:5472411-5483170:-1	cerebral endothelial cell adhesion molecule	20.5032	31.3246	0.654538
LOC107056331	.	.	protein FAM122A-like	2.50583	3.83018	0.654234
KIAA1755	.	.	KIAA1755 ortholog	1.87617	2.86805	0.654162
LOC107050993	.	.	procollagen C-endopeptidase enhancer 1-like	20.7592	31.7457	0.653921
LOC100857638	.	.	killer cell immunoglobulin-like receptor 3DL3-like	0.662	1.0125	0.653827
NPAS2	1	1:133370840-133430784:+1	neuronal PAS domain protein 2	1.84917	2.82959	0.65351
ENSGALG00000027051	19	19:4787699-4789411:-1		48.3888	74.0487	0.653473
LOC107049862	.	.	uncharacterized LOC107049862	1.065	1.62986	0.653429
LHFPL5	26	26:93767-97080:+1	lipoma HMGIC fusion partner-like 5	1.6265	2.48936	0.65338
OLFML3	26	26:3801699-3803416:+1	olfactomedin like 3	9.98083	15.2817	0.653122
GPX4	.	.	glutathione peroxidase 4	438.766	671.83	0.65309
ENSGALG00000038818	AADN04010096.1	AADN04010096.1:6324-7278:+1		1.81417	2.7785	0.65293
VAT1L	11	11:14182753-14226089:+1	vesicle amine transport 1-like	2.954	4.52486	0.652837
ADO	.	.	2-aminoethanethiol (cysteamine) dioxygenase	1.8285	2.80286	0.652369
ENSGALG00000033302	AADN04008809.1	AADN04008809.1:2963-8716:-1		1.87717	2.87845	0.652144
LOC107057405	.	.	uncharacterized LOC107057405	1.29017	1.97836	0.652138
EFCAB10	1	1:14012404-14013602:-1	EF-hand calcium binding domain 10	0.967667	1.48482	0.651707
REEP6	.	.	receptor accessory protein 6	5.16433	7.93823	0.650565
SOCS3	18	18:9931036-9933083:+1	suppressor of cytokine signaling 3	5.54117	8.52445	0.650032
PDZD2	.	.	PDZ domain containing 2	2.58867	3.984	0.649766
ENSGALG00000033917	KQ759343.1	KQ759343.1:16449-19428:+1		9.78917	15.0679	0.649672
SERPINI1	9	9:20661326-20700365:-1	serpin family I member 1	264.495	407.149	0.649626
ENSGALG00000030995	AADN04002998.1	AADN04002998.1:14539-15275:-1		0.948	1.46086	0.648931
SLC9A3R2	14	14:6272207-6298019:+1	solute carrier family 9, subfamily A (NHE3, cation proton antiporter 3), member 3 regulator 2	2.09267	3.22591	0.648706
ENSGALG00000033187	3	3:104942325-104943998:+1		7.95067	12.2586	0.648577
ENSGALG00000029840	AADN04001279.1	AADN04001279.1:3890-5052:-1		1.348	2.07986	0.648119
ENSGALG00000004503	19	19:6576258-6579271:-1		6.73567	10.3945	0.648006
GLUL	8	8:5649024-5655566:+1	glutamate-ammonia ligase	4.01483	6.203	0.647241
ENSGALG00000034568	KQ759443.1	KQ759443.1:15440-27148:-1		7.846	12.1359	0.646511
ZBTB16	24	24:4467296-4538656:-1	zinc finger and BTB domain containing 16	0.8795	1.36073	0.646346
IRX6	11	11:3976048-3979385:-1	iroquois homeobox 6	4.73217	7.33114	0.645489
SERPINF2	19	19:5397323-5403025:+1	serpin peptidase inhibitor, clade F (alpha-2 antiplasmin, pigment epithelium derived factor), member 2	15.4687	23.9649	0.645472
lasp-2	2	2:18140059-18382967:+1		1.70733	2.64709	0.644985
SERINC2	23	23:612115-618224:+1	serine incorporator 2	0.671667	1.04264	0.6442
ENSGALG00000045244	AADN04002981.1	AADN04002981.1:8602-9870:+1		0.693	1.07595	0.644079
EPHX1	.	.	epoxide hydrolase 1, microsomal (xenobiotic)	7.39567	11.486	0.643885
ENSGALG00000009291	3	3:17239079-17259481:-1		2.46517	3.82868	0.643868
MGST1	1	1:63309031-63315665:+1	microsomal glutathione S-transferase 1	463.471	720.235	0.6435
HSPB8	15	15:9765688-9767739:-1	heat shock protein family B (small) member 8	1.81733	2.826	0.643076
ENSGALG00000008888	4	4:16915775-17249012:+1		0.6455	1.00405	0.642899
MAPKAPK3	12	12:1880037-1922149:+1	mitogen-activated protein kinase-activated protein kinase 3	5.21267	8.11518	0.642335
EDNRB2	4	4:11210631-11219813:+1	endothelin receptor B subtype 2	2.614	4.07327	0.641744
ENSGALG00000046136	AADN04009180.1	AADN04009180.1:4841-6105:-1		0.9765	1.52259	0.641341
ENSGALG00000004509	19	19:6584989-6587790:+1	Polyubiquitin-B Ubiquitin	165.203	257.628	0.641248
PPP1R3G	.	.	protein phosphatase 1, regulatory subunit 3G	1.2125	1.89118	0.641133
GPR27	.	.	G protein-coupled receptor 27	1.084	1.69082	0.64111
DMD	1	1:114486908-115483002:+1	dystrophin	1.4695	2.29223	0.64108
ENSGALG00000041387	6	6:8082548-8085889:-1		1.398	2.18205	0.640683
RHBDF1	14	14:12040976-12061073:-1	rhomboid 5 homolog 1 (Drosophila)	5.69067	8.88309	0.640618
PPP1R16B	20	20:3918080-3963460:+1	protein phosphatase 1, regulatory subunit 16B	2.1135	3.30018	0.640419
A4GALT	1	1:68397254-68409951:-1	alpha 1,4-galactosyltransferase (P blood group)	0.903667	1.41118	0.640362
FAM110A	20	20:10105034-10106029:-1	family with sequence similarity 110 member A	1.867	2.91655	0.640141
C12orf75	1	1:54229629-54246246:-1	chromosome 12 open reading frame 75	80.006	124.987	0.640114
FRZB	7	7:2312660-2328060:+1	frizzled-related protein	226.069	353.188	0.640082
TAF4B	2	2:104463654-104519187:+1	TAF4b RNA polymerase II, TATA box binding protein (TBP)-associated factor, 105kDa	1.51817	2.37309	0.639742
ENSGALG00000022718	1	1:185674161-185675231:-1		8.32983	13.0255	0.639502
ENSGALG00000042316	AADN04015506.1	AADN04015506.1:3807-5495:-1		12.1732	19.0358	0.639489
ENSGALG00000038693	13	13:1852536-1854490:+1		2.8175	4.40636	0.639416
DOK7	4	4:82476481-82501693:-1	docking protein 7	2.17583	3.40423	0.639156
CDO1	Z	Z:72942623-72952484:+1	cysteine dioxygenase type 1	2.84967	4.46005	0.638932
SGOL2	.	.	shugoshin-like 2 (S. pombe)	0.722167	1.1305	0.638803
NUP35	.	.	nucleoporin 35kDa	2.28167	3.57191	0.638781
STX11	.	.	syntaxin 11	3.277	5.13173	0.638576
STK19	AADN04004686.1	AADN04004686.1:21-8051:-1	serine/threonine kinase 19	3.65617	5.72568	0.638556
ENSGALG00000011673	3	3:46043706-46044572:+1		1.63817	2.566	0.638413
ENSGALG00000034491	AADN04013086.1	AADN04013086.1:2491-3357:+1		1.63817	2.566	0.638413
LOC107056189	.	.	syntaxin-11-like	1.63817	2.566	0.638413
LOC107057366	.	.	ATP-dependent RNA helicase DDX19B-like	1.78417	2.80018	0.637161
WNT16	1	1:23246190-23256408:-1	Wnt family member 16	0.656667	1.03218	0.636193
LOC107050675	.	.	uncharacterized LOC107050675	2.68333	4.21809	0.636149
LRP11	3	3:48405551-48422542:-1	LDL receptor related protein 11	1.25983	1.98214	0.635594
FAM213A	6	6:4394067-4405386:-1	family with sequence similarity 213 member A	23.1698	36.456	0.635557
CPLX2	.	.	complexin 2	1.8865	2.97023	0.635137
B3GNT5	9	9:16350056-16354532:-1	UDP-GlcNAc:betaGal beta-1,3-N-acetylglucosaminyltransferase 5	5.60367	8.82445	0.635016
ANKRD39	.	.	ankyrin repeat domain 39	2.064	3.2515	0.634784
RERG	1	1:62659918-62765595:-1	RAS like estrogen regulated growth inhibitor	21.5173	33.9155	0.63444
ENPP1	.	.	ectonucleotide pyrophosphatase/phosphodiesterase 1	0.8495	1.33932	0.634278
SLC25A4	4	4:39636713-39639533:-1	solute carrier family 25 member 4	9.2655	14.6091	0.634226
SOBP	3	3:67883237-67992910:-1	sine oculis binding protein homolog	0.873	1.37768	0.633673
CGREF1	.	.	cell growth regulator with EF-hand domain 1	0.742667	1.17341	0.632914
AGTR1	9	9:12398415-12430615:+1	Type-1 angiotensin II receptor	3.59867	5.68691	0.632798
URAH	.	.	5-hydroxyisourate hydrolase	3.97033	6.27459	0.632764
ENSGALG00000012781	2	2:64503520-64520600:+1		116.682	184.504	0.632409
PPP1R3B	4	4:49871077-49871970:-1	protein phosphatase 1 regulatory subunit 3B	12.99	20.5687	0.631541
DCBLD2	1	1:84531130-84573579:+1	discoidin, CUB and LCCL domain containing 2	5.04233	7.98814	0.631228
LOC107055914	.	.	probable phospholipid-transporting ATPase IIB	0.675833	1.07127	0.63087
ENSGALG00000035561	2	2:123675047-123692295:+1		2.58117	4.09332	0.630581
ENSGALG00000030319	6	6:22300953-22301240:+1		16.5888	26.3092	0.630533
TP53TG5	.	.	TP53 target 5	0.700667	1.11209	0.630044
ENSGALG00000003921	20	20:5248043-5254471:-1		39.4518	62.648	0.629739
CTNND2	2	2:77650257-78277058:+1	catenin (cadherin-associated protein), delta 2	0.664333	1.05518	0.629591
LOC107057335	.	.	solute carrier family 12 member 5-like	1.409	2.23968	0.629107
ENSGALG00000039696	17	17:892629-900397:+1		3.54883	5.647	0.628446
CTNNBIP1	21	21:3540234-3551161:-1	catenin beta interacting protein 1	87.394	139.074	0.628401
CHMP4C	2	2:122037633-122051680:+1	charged multivesicular body protein 4C	6.69017	10.6708	0.626959
CAPN5	1	1:193324498-193358592:-1	calpain 5	1.6915	2.69909	0.626692
CAMKK1	19	19:3300492-3382167:+1	calcium/calmodulin-dependent protein kinase kinase 1, alpha	1.77533	2.83555	0.626099
TMEM45A	1	1:84910507-84928051:+1	transmembrane protein 45A	28.3288	45.251	0.626037
PRICKLE1	1	1:29649659-29708429:-1	prickle planar cell polarity protein 1	1.67517	2.67691	0.625784
MYO5A	10	10:8734575-8826134:+1	unconventional myosin-Va	11.6298	18.5855	0.625748
THSD4	10	10:6291473-6524226:+1	thrombospondin, type I, domain containing 4	2.45317	3.92345	0.625257
RSPO3	3	3:59438707-59496891:-1	R-spondin 3	46.225	73.9566	0.625029
C11orf96	5	5:21670426-21671409:+1	chromosome 11 open reading frame 96	0.963	1.54155	0.624698
ENSGALG00000043015	20	20:10262866-10263984:-1		3.44517	5.51723	0.624438
HAND2	4	4:43676569-43677709:-1	heart and neural crest derivatives expressed 2	1.125	1.80168	0.624417
CYBRD1	7	7:18094028-18102411:-1	cytochrome b reductase 1	10.5247	16.8675	0.623961
LOC101752260	.	.	uncharacterized LOC101752260	1.5805	2.53386	0.623751
ENSGALG00000034655	6	6:35375486-35423274:+1		8.98617	14.4127	0.623488
IRX5	.	.	iroquois homeobox 5	3.05017	4.89809	0.622726
OPA3	KQ759481.1	KQ759481.1:46488-52105:+1	OPA3, outer mitochondrial membrane lipid metabolism regulator	3.67533	5.90632	0.622271
IRG1	1	1:154478654-154500025:-1	immunoresponsive 1 homolog (mouse)	56.9085	91.4575	0.62224
PPP1R17	2	2:48651543-48669758:-1	protein phosphatase 1 regulatory subunit 17	20.7368	33.3487	0.621818
GGCL1	19	19:389572-391141:+1		42.8383	68.9192	0.621573
PI16	.	.	peptidase inhibitor 16	2.10683	3.39155	0.621202
DPP10	7	7:29342320-29524384:-1	dipeptidyl-peptidase 10 (non-functional)	0.621833	1.00123	0.621071
LOC107052690	.	.	centrosomal protein of 290 kDa-like	3.9525	6.36986	0.6205
ITIH6	AADN04000849.1	AADN04000849.1:26946-31104:-1	inter-alpha-trypsin inhibitor heavy chain family, member 6	0.996	1.60723	0.619701
ENSGALG00000037835	AADN04008257.1	AADN04008257.1:2303-5761:+1		7.87533	12.7105	0.619593
CAB39L	1	1:169147469-169208168:-1	calcium binding protein 39-like	13.7585	22.2369	0.618725
LOC107050188	.	.	uncharacterized LOC107050188	0.723333	1.16986	0.618306
ENSGALG00000001620	17	17:8764467-8771954:+1		1.43317	2.32032	0.61766
TNFAIP6	7	7:35317404-35331118:+1	TNF alpha induced protein 6	16.5302	26.7722	0.617438
PRKG2	4	4:45935473-45954816:+1	protein kinase, cGMP-dependent, type II	4.0845	6.62682	0.616359
CHIR-B5	AADN04000971.1	AADN04000971.1:8022-30303:+1	Gallus gallus immunoglobulin-like receptor CHIR-B5 (CHIR-B5), mRNA.	0.810167	1.31477	0.616203
SMIM5	18	18:4846231-4857284:-1	small integral membrane protein 5	7.72617	12.5411	0.616066
ACACB	15	15:6711180-6730689:+1	acetyl-CoA carboxylase beta	0.943333	1.53355	0.615132
LIPG	Z	Z:1062374-1068322:-1	lipase G, endothelial type	3.8895	6.32314	0.615122
LOC107049647	.	.	translation initiation factor IF-2-like	2.12083	3.44964	0.614799
ENPP3	3	3:57434063-57467478:-1	ectonucleotide pyrophosphatase/phosphodiesterase 3	2.4645	4.01491	0.613837
ENSGALG00000005180	8	8:11178211-11316534:+1		12.7272	20.7346	0.613813
SPDEF	26	26:4355984-4357800:+1	SAM pointed domain containing ETS transcription factor	0.705333	1.14936	0.613673
FAM189A2	Z	Z:34684202-34697214:+1	family with sequence similarity 189, member A2	2.16183	3.52327	0.613587
ENSGALG00000009006	2	2:21669403-21678883:+1		21.6902	35.3516	0.613556
ENSGALG00000036629	13	13:1851537-1852461:+1		1.84933	3.01623	0.613128
LOC426820	.	.	deleted in malignant brain tumors 1 protein-like	6.71017	10.9454	0.61306
ESR1	3	3:49187155-49301908:+1	estrogen receptor 1	0.702167	1.14573	0.612857
AC024592.12	.	.	Uncharacterized protein	1.643	2.68568	0.611763
CRISPLD1	2	2:118909175-118947095:+1	cysteine-rich secretory protein LCCL domain containing 1	2.93167	4.79427	0.611494
ENSGALG00000036871	8	8:3842495-3871870:-1		2.0185	3.30123	0.611439
PKDCC	3	3:23383274-23414870:+1	protein kinase domain containing, cytoplasmic	0.641667	1.04982	0.611217
EPYC	1	1:43925156-43947733:-1	epiphycan	2.6355	4.31345	0.610995
ENSGALG00000031443	KQ759471.1	KQ759471.1:677-4614:+1		3.76233	6.15823	0.610944
KANK1	Z	Z:25816644-25934004:+1	KN motif and ankyrin repeat domains 1	4.81667	7.88577	0.610805
LOC107057270	.	.	serine/arginine repetitive matrix protein 1-like	0.852	1.39527	0.610633
LOC100858647	.	.	beta-microseminoprotein-like	7.87333	12.8967	0.610493
CEP85	23	23:222695-233308:-1	centrosomal protein 85kDa	6.00767	9.85455	0.609634
ENSGALG00000042427	4	4:50061940-50067610:-1		1.34	2.1985	0.609506
LOC107055769	.	.	sestrin-3-like	10.1393	16.6482	0.609034
PDE4DIP	.	.	phosphodiesterase 4D interacting protein	6.58083	10.8119	0.608668
PRODH	.	.	proline dehydrogenase (oxidase) 1	4.267	7.01327	0.608418
LTBP1	3	3:31210825-31393401:-1	latent transforming growth factor beta binding protein 1	110.848	182.284	0.608108
ENSGALG00000042238	9	9:7954674-7954904:+1		1.11183	1.82905	0.607876
ENSGALG00000044903	W	W:1981967-1982254:-1		1.58733	2.61159	0.607803
ENSGALG00000045108	KQ759365.1	KQ759365.1:56948-57235:+1		1.58733	2.61159	0.607803
ENSGALG00000011870	5	5:54055991-54086580:-1		79.9273	131.557	0.607548
ENSGALG00000017204	1	1:185466218-185503920:+1		4.9005	8.06677	0.607492
SESN3	.	.	sestrin 3	9.80067	16.1335	0.607475
IGFBP2	7	7:23382780-23435025:-1	insulin-like growth factor binding protein 2, 36kDa	46.0283	75.7959	0.607267
GCH1	5	5:56470545-56487623:+1	GTP cyclohydrolase 1	3.93	6.47486	0.606963
ENSGALG00000033356	AADN04000662.1	AADN04000662.1:51485-53359:+1		1.35667	2.23518	0.60696
ENSGALG00000038516	1	1:48119159-48119554:-1		1.04433	1.72127	0.606722
ENSGALG00000043525	1	1:48120731-48121126:+1		1.04433	1.72127	0.606722
ENSGALG00000031889	5	5:18522566-18531083:-1		1.14967	1.89714	0.606001
ENSGALG00000037152	AADN04015530.1	AADN04015530.1:1434-4584:+1		1.0565	1.74359	0.605933
TRIM36	Z	Z:78755550-78774831:-1	tripartite motif containing 36	1.22483	2.02168	0.605849
FAM81A	10	10:6654750-6665773:-1	family with sequence similarity 81, member A	1.02667	1.69573	0.605443
ENSGALG00000010722	2	2:26674819-26685279:+1		0.668833	1.10495	0.605304
LOC776458	.	.	C-type lectin domain family 2 member D-like	4.35233	7.19882	0.60459
ENSGALG00000038710	1	1:71890196-71896378:-1		2.03133	3.36195	0.604212
HOXD9	7	7:16362036-16363342:-1	homeobox D9	0.727833	1.20627	0.603374
PTPRM	2	2:99160698-99619495:-1	protein tyrosine phosphatase, receptor type, M	1.5965	2.64959	0.602546
PDGF-A	14	14:1992075-2013552:-1	platelet derived growth factor subunit A	2.20967	3.66741	0.602514
ENSGALG00000037933	2	2:126664603-126688404:-1		0.786667	1.30677	0.601992
RNF2	8	8:8057403-8073540:+1	ring finger protein 2	1.21867	2.02682	0.601271
CG-16	.	.	galectin CG-16	0.817833	1.36118	0.600826
LOXL3	.	.	lysyl oxidase-like 3	9.94467	16.5608	0.600495
C1R	.	.	complement component 1, r subcomponent	1.26033	2.09927	0.600367
ENSGALG00000014659	1	1:77392527-77399415:-1		1.26033	2.09927	0.600367
C4H20ORF194	.	.	chromosome 4 open reading frame, human C20orf194	21.6028	35.9981	0.60011
ENSGALG00000038984	23	23:5470595-5477143:+1		5.22783	8.71914	0.599582
ATP2B2	12	12:3752214-4001595:+1	ATPase plasma membrane Ca2+ transporting 2	1.29133	2.15391	0.59953
TNFRSF14	.	.	tumor necrosis factor receptor superfamily, member 14	1.58	2.63577	0.599445
BMP8B	.	.	bone morphogenetic protein 8b	5.3435	8.91577	0.599331
LOC100858014	.	.	EMILIN-1-like	2.91683	4.86886	0.599079
C7	Z	Z:12937309-12956457:+1	complement C7	2.56483	4.28527	0.598523
UACA	.	.	uveal autoantigen with coiled-coil domains and ankyrin repeats	16.4942	27.5643	0.598388
MAP3K5	3	3:55132631-55230515:+1	mitogen-activated protein kinase kinase kinase 5	18.3448	30.677	0.598
COL15A1	2	2:55990571-56094186:+1	collagen, type XV, alpha 1	4.30433	7.20086	0.597752
PSPH	19	19:4836675-4867667:-1	Gallus gallus phosphoserine phosphatase (PSPH), mRNA.	16.2473	27.1961	0.597413
CDH1	11	11:19110019-19123142:+1	cadherin 1, type 1, E-cadherin (epithelial)	13.444	22.5041	0.597401
LOC107049051	.	.	biogenesis of lysosome-related organelles complex 1 subunit 3-like	2.06017	3.44959	0.597221
ALDH18A1	.	.	aldehyde dehydrogenase 18 family, member A1	32.8325	55.0046	0.596905
BMPER	2	2:47688331-47834840:-1	BMP binding endothelial regulator	9.3555	15.6915	0.596216
ENSGALG00000017658	Z	Z:41061552-41062205:-1		2.86233	4.80377	0.595851
ARHGDIG	14	14:12286477-12288978:-1	Rho GDP dissociation inhibitor (GDI) gamma	14.5602	24.4375	0.595814
PALM	28	28:2775252-2789996:+1	paralemmin	2.77533	4.66241	0.595257
HAS2	2	2:137467301-137485205:-1	hyaluronan synthase 2	5.119	8.609	0.59461
ENSGALG00000017040	1	1:171268903-171314194:-1		1.08733	1.82877	0.59457
LOC101750767	.	.	uncharacterized LOC101750767	1.394	2.34914	0.59341
LOC768671	.	.	serine/threonine-protein kinase 19-like	3.23483	5.45959	0.592505
LOC107052128	.	.	thrombospondin type-1 domain-containing protein 4-like	0.710333	1.19945	0.592214
ENSGALG00000012787	2	2:64587752-64609767:-1		6.39533	10.8026	0.592016
NRARP	17	17:1143212-1143556:-1	NOTCH-regulated ankyrin repeat protein	4.90983	8.29532	0.59188
CSGALNACT1	4	4:34344526-34358907:-1	chondroitin sulfate N-acetylgalactosaminyltransferase 1	8.00167	13.5199	0.591845
SDK2	18	18:9107305-9148769:-1	sidekick cell adhesion molecule 2	0.927833	1.56864	0.59149
GCOM1	.	.	GRINL1A complex locus 1	1.29567	2.19305	0.590807
ENSGALG00000035527	AADN04011666.1	AADN04011666.1:105-5509:-1		2.55983	4.33536	0.590454
LOC107055741	.	.	stAR-related lipid transfer protein 13-like	2.55983	4.33536	0.590454
ENSGALG00000033587	1	1:48193459-48195214:+1		0.987833	1.67541	0.589607
TLR15	3	3:3021314-3024977:-1	Gallus gallus toll-like receptor 15 (TLR15), mRNA.	57.5443	97.6037	0.589571
LIN7A	1	1:40029520-40056169:-1	lin-7 homolog A (C. elegans)	1.306	2.21541	0.589507
ST14	24	24:1562614-1582952:+1	suppression of tumorigenicity 14 (colon carcinoma)	12.5048	21.2137	0.58947
S100B	7	7:6920734-6923751:+1	S100 calcium binding protein B	1.40567	2.38473	0.589445
NDUFAF8	18	18:9347716-9348299:-1	NADH:ubiquinone oxidoreductase complex assembly factor 8	9.3525	15.8695	0.58934
LOC107049001	.	.	leukocyte immunoglobulin-like receptor subfamily B member 3	3.52533	5.98505	0.589024
SH2D4A	4	4:34329676-34340802:+1	SH2 domain containing 4A	2.24433	3.81159	0.588818
NPR3	Z	Z:10035886-10086792:-1	natriuretic peptide receptor C/guanylate cyclase C (atrionatriuretic peptide receptor C)	0.927	1.57609	0.588164
JPH3	11	11:18097779-18138763:+1	junctophilin 3	2.47283	4.20818	0.587625
LOC107055587	.	.	ranBP2-like and GRIP domain-containing protein 3	0.729333	1.24123	0.58759
ENSGALG00000043814	AADN04021278.1	AADN04021278.1:832-1426:-1		0.749	1.27482	0.587535
SESN1	3	3:67233670-67306780:+1	sestrin 1	48.5358	82.6133	0.587506
C11orf52	24	24:6200315-6206582:-1	chromosome 24 open reading frame, human C11orf52	4.717	8.02986	0.587432
LOC107056976	.	.	complexin-2-like	1.7735	3.0295	0.58541
PKDCCa	.	.	pkdcca protein kinase domain containing, cytoplasmic a	0.655667	1.12073	0.585037
COL27A1	.	.	collagen, type XXVII, alpha 1	3.13083	5.35382	0.584785
LIFR	Z	Z:12007504-12048425:-1	LIF receptor alpha	2.73117	4.67741	0.583906
NMRAL1	14	14:12800888-12805826:-1	NmrA like redox sensor 1	26.7913	45.8865	0.583861
CPM	1	1:35315781-35347355:-1	carboxypeptidase M	3.44617	5.90305	0.583795
ALDH9A1	.	.	aldehyde dehydrogenase 9 family, member A1	1.98117	3.39836	0.582977
BLB2	16	16:109677-111212:-1		18.248	31.3085	0.582845
ENSGALG00000031239	AADN04016278.1	AADN04016278.1:3009-4427:+1		4.28767	7.35905	0.582639
CD109	3	3:81650139-81729852:-1	CD109 molecule	16.2887	27.9612	0.582546
HTR7	4	4:89413990-89421936:-1	5-hydroxytryptamine (serotonin) receptor 7, adenylate cyclase-coupled	1.284	2.20559	0.582157
PALM2	Z	Z:65592725-65702020:+1	paralemmin 2	4.457	7.65605	0.582154
OTOS	9	9:5214754-5217385:+1	otospiralin	23.9065	41.0674	0.582128
LOC418892	.	.	complement C4-like	2.10617	3.62073	0.581697
CHRDL2	1	1:195912297-195938222:+1	chordin-like 2	1.2255	2.10877	0.581144
C14orf180	.	.	chromosome 14 open reading frame 180	194.377	334.589	0.580943
CACNA2D2	12	12:1481230-1608215:-1	calcium channel, voltage-dependent, alpha 2/delta subunit 2	1.075	1.85223	0.580382
BTBD11	.	.	BTB (POZ) domain containing 11	0.999333	1.72359	0.579797
ATP10A	1	1:131727335-131837673:+1	ATPase phospholipid transporting 10A (putative)	13.2952	22.9313	0.579783
RARRES2	.	.	retinoic acid receptor responder (tazarotene induced) 2	0.651833	1.12441	0.579712
RGCC	1	1:165953711-165963304:+1	regulator of cell cycle	19.1518	33.0383	0.579685
C6orf58	3	3:59239901-59251787:-1	chromosome 6 open reading frame 58	1.62417	2.80364	0.579307
SLC1A2	5	5:19027052-19102516:-1	solute carrier family 1 member 2	3.26467	5.63614	0.579238
NSMF	.	.	NMDA receptor synaptonuclear signaling and neuronal migration factor	2.794	4.82445	0.579133
PRR16	Z	Z:71195874-71300629:-1	proline rich 16	0.684833	1.18364	0.578584
LOC100857945	.	.	ATPase inhibitor, mitochondrial-like	15.5555	26.8917	0.578449
LOC107056278	.	.	probable N-acetyltransferase camello	1.339	2.31723	0.577846
ENSGALG00000009959	1	1:35565047-35594362:+1		2.7585	4.77391	0.577828
ENSGALG00000009612	3	3:19369482-19432348:-1		5.879	10.1798	0.577518
PRKCA	18	18:7389079-7502399:-1	protein kinase C alpha	13.5537	23.4792	0.577262
SUSD1	Z	Z:66156522-66193789:+1	sushi domain containing 1	35.9633	62.3042	0.577221
C11orf31	5	5:16974079-16974902:-1	selenoprotein H	4.29283	7.43945	0.577036
IGFBP7	.	.	insulin-like growth factor binding protein 7	0.66	1.14495	0.576442
ENSGALG00000006453	9	9:4590500-4601249:-1		301.332	523.126	0.576022
ITGA7	AADN04000737.1	AADN04000737.1:3188-15551:+1	integrin, alpha 7	1.77883	3.09059	0.575564
FRAS1	4	4:35018318-35181390:-1	Fraser extracellular matrix complex subunit 1	2.63267	4.58027	0.574784
ENSGALG00000030096	21	21:5188478-5202561:-1		1.46417	2.54773	0.574695
FST	Z	Z:16072649-16079246:+1	follistatin	4.77367	8.30764	0.574612
ENSGALG00000043174	2	2:98109943-98165703:+1		2.34667	4.09127	0.573579
SHISA9	.	.	shisa family member 9	2.51983	4.39582	0.573234
LOC107049555	.	.	translation initiation factor IF-2-like	1.3585	2.37214	0.572691
ENSGALG00000007728	15	15:10154963-10165658:-1		8.576	14.9759	0.572655
SOX6	5	5:11115670-11366088:-1	SRY (sex determining region Y)-box 6	0.674667	1.17855	0.572457
G0S2	26	26:3140221-3141106:+1	G0/G1 switch 2	210.939	368.881	0.571836
ENSGALG00000045129	8	8:11888215-11890079:-1		3.80783	6.66736	0.571115
TNFSF15	17	17:3061247-3074511:-1	TNF superfamily member 15	7.61883	13.3482	0.570775
IL17REL	1	1:20036081-20070713:-1	interleukin 17 receptor E-like	7.61967	13.3666	0.570053
HPGD	4	4:44051784-44077636:-1	hydroxyprostaglandin dehydrogenase 15-(NAD)	2.25867	3.96255	0.570004
CYSLTR2	.	.	cysteinyl leukotriene receptor 2	1.24467	2.18395	0.569914
ENSGALG00000042236	AADN04001811.1	AADN04001811.1:21-20443:+1		0.966833	1.69668	0.569838
SIX2	3	3:25957358-25960417:-1	SIX homeobox 2	5.82417	10.2264	0.569525
RALY	20	20:1754822-1773193:-1	RALY heterogeneous nuclear ribonucleoprotein	0.6705	1.17841	0.568987
RHOU	.	.	ras homolog family member U	0.733	1.29068	0.567917
ENSGALG00000046519	10	10:17005730-17007081:+1		5.938	10.4598	0.567699
BBOX1	5	5:3484747-3518031:+1	butyrobetaine (gamma), 2-oxoglutarate dioxygenase (gamma-butyrobetaine hydroxylase) 1	2.52217	4.45014	0.566762
THBS1	5	5:29636380-29652162:-1	thrombospondin-1 precursor	216.27	381.714	0.566576
ENSGALG00000032414	AADN04004890.1	AADN04004890.1:2081-7490:+1		2.16933	3.83032	0.566359
ENSGALG00000035680	3	3:54565080-54565526:-1		0.568167	1.00355	0.566159
GPC4	4	4:3791474-3853513:-1	glypican 4	31.3717	55.4263	0.566007
H2AFY2	6	6:11993572-12006063:-1	H2A histone family member Y2	3.603	6.37564	0.56512
AK5	.	.	adenylate kinase 5	0.827333	1.46586	0.5644
EPDR1	.	.	ependymin related 1	2.7565	4.88545	0.564226
GM2A	.	.	GM2 ganglioside activator	19.5995	34.762	0.56382
JPH1	2	2:118543324-118621765:-1	junctophilin 1	0.703333	1.24814	0.563507
SLC6A2	11	11:3672299-3735390:-1	solute carrier family 6 (neurotransmitter transporter, noradrenalin), member 2	7.32633	13.003	0.563432
SLC1A6	28	28:682646-704983:-1	solute carrier family 1 (high affinity aspartate/glutamate transporter), member 6	2.84617	5.05241	0.563329
ENSGALG00000011894	1	1:49442475-49451655:+1		2.02483	3.59764	0.562823
LOC419322	.	.	uncharacterized LOC419322	1.24183	2.20873	0.562239
LOC107051404	.	.	proline-rich extensin-like protein EPR1	0.684833	1.22077	0.560983
ENSGALG00000030769	4	4:61536299-61629758:-1		0.859667	1.53473	0.560143
IBSP	4	4:45990272-45991492:-1	integrin binding sialoprotein	55.1355	98.4695	0.559925
ENSGALG00000042642	2	2:396849-398637:+1		63.8108	114.033	0.55958
FGFRL1	4	4:85648812-85814057:-1	fibroblast growth factor receptor-like 1 precursor	13.9053	24.8564	0.559427
ENSGALG00000037332	4	4:49474814-49502263:+1		11.0103	19.687	0.559271
ADAMTS6	.	.	ADAM metallopeptidase with thrombospondin type 1 motif, 6	3.183	5.693	0.559108
FAM38B	.	.	family with sequence similarity 38, member B	1.8385	3.28932	0.55893
ENSGALG00000006805	9	9:11576135-11588043:-1		16.7885	30.0374	0.558921
PLSCR1	.	.	phospholipid scramblase 1	50.3655	90.1121	0.558921
HSPG2	.	.	heparan sulfate proteoglycan 2	7.74183	13.8555	0.558753
C22orf39	15	15:664843-665327:-1	chromosome 22 open reading frame 39	4.23617	7.5815	0.55875
LOC100859284	.	.	undifferentiated embryonic cell transcription factor 1-like	0.558833	1.00105	0.55825
ENSGALG00000046405	AADN04002495.1	AADN04002495.1:14324-17609:+1		2.11083	3.78464	0.557737
BEAN1	11	11:11619893-11657333:-1	brain expressed associated with NEDD4 1	2.32333	4.16582	0.557714
MINPP1	6	6:9679455-9696260:-1	multiple inositol-polyphosphate phosphatase 1	51.2825	92.0857	0.5569
ENSGALG00000031701	AADN04003712.1	AADN04003712.1:3203-6050:-1		7.10033	12.7564	0.556611
FEZ1	24	24:124425-134392:+1	fasciculation and elongation protein zeta 1	5.42917	9.75827	0.556366
HMGN1	.	.	high mobility group nucleosome binding domain 1	1.91667	3.44632	0.556149
ENSGALG00000045684	28	28:3443528-3445707:-1		0.870167	1.56541	0.555872
PLVAP	.	.	plasmalemma vesicle associated protein	0.870167	1.56541	0.555872
TSNAX	.	.	translin-associated factor X	0.615667	1.109	0.555155
SCG3	10	10:9089657-9116974:-1	secretogranin-3 isoform 2 precursor	1.9775	3.56414	0.554833
NQO1	11	11:19278734-19280589:-1	NAD(P)H dehydrogenase	2.94167	5.30273	0.554746
ALDOB	Z	Z:65124989-65133725:+1	aldolase, fructose-bisphosphate B	10.547	19.026	0.554347
ABLIM1	6	6:27848491-28021075:-1	actin binding LIM protein 1	0.593333	1.07041	0.554305
ENSGALG00000026363	2	2:81004787-81009194:-1		1.838	3.31723	0.554077
ENSGALG00000008018	20	20:14008762-14012151:-1		8.43183	15.2274	0.553729
ENSGALG00000042471	1	1:3482204-3498520:-1		4.088	7.38845	0.553296
DGAT2	1	1:194877499-194892393:-1	diacylglycerol O-acyltransferase 2	2.72833	4.94095	0.552187
VSNL1	3	3:100515714-100591520:+1	visinin-like 1	1.89067	3.429	0.551376
SORBS2	.	.	sorbin and SH3 domain containing 2	1.4835	2.69123	0.551235
ENSGALG00000004788	10	10:9143976-9183149:-1		6.43567	11.6906	0.550498
TNFAIP8L3	.	.	tumor necrosis factor, alpha-induced protein 8-like 3	6.43567	11.6906	0.550498
EGR2	6	6:8083266-8085712:+1	early growth response 2	1.27683	2.31959	0.550456
LOC107057311	.	.	protein MANBAL-like	1.5125	2.74818	0.550364
ENSGALG00000033867	AADN04012722.1	AADN04012722.1:1634-4909:-1		1.19533	2.17409	0.549808
ARSI	13	13:13183770-13186780:+1	arylsulfatase family member I	4.676	8.51159	0.549369
SOX5	1	1:65938356-66226982:+1	SRY (sex determining region Y)-box 5	3.2505	5.9245	0.548654
ENSGALG00000043426	AADN04001868.1	AADN04001868.1:10945-11772:-1		4.27467	7.7965	0.54828
LOC101748955	.	.	uncharacterized LOC101748955	2.14167	3.90632	0.548257
MLPH	7	7:4777561-4795271:-1	melanophilin	1.342	2.44905	0.547969
AP000721.4	.	.	Uncharacterized protein	11.2367	20.5152	0.547724
EPB41L5	7	7:25578779-25609136:+1	erythrocyte membrane protein band 4.1 like 5	1.03133	1.88355	0.547549
POU4F1	1	1:153534532-153536340:+1	POU class 4 homeobox 1	1.712	3.127	0.54749
LOC107055532	.	.	serine/arginine repetitive matrix protein 1-like	6.727	12.296	0.547088
LOC770026	.	.	OX-2 membrane glycoprotein-like	1.48217	2.70986	0.546952
LOC107050094	.	.	uncharacterized LOC107050094	6.9315	12.6811	0.546601
LOC101747454	.	.	uncharacterized LOC101747454	15.2065	27.8346	0.546317
LOC100859798	.	.	protein FAM134B-like	12.889	23.6125	0.545856
LOC100858282	.	.	C-type lectin domain family 2 member E-like	1.4375	2.63732	0.545061
CYP1B1	3	3:32004825-32007728:-1	cytochrome P450 family 1 subfamily B member 1	25.2502	46.366	0.544583
BFIV21	16	16:73915-76152:+1		31.9317	58.6975	0.544003
HLF	18	18:5980976-6011456:+1	HLF, PAR bZIP transcription factor	1.25883	2.31427	0.543943
SEMA3B	12	12:3221466-3225875:+1	sema domain, immunoglobulin domain (Ig), short basic domain, secreted, (semaphorin) 3B	2.43017	4.47691	0.542822
LOC107056061	.	.	DNA replication licensing factor mcm4-B-like	1.02483	1.88818	0.542762
CADPS	.	.	Ca++-dependent secretion activator	0.797333	1.46923	0.542689
ITM2C	9	9:5386985-5403209:-1	integral membrane protein 2C	0.999833	1.84559	0.541742
LOC101749643	.	.	zinc finger protein 385A-like	1.34	2.47423	0.541583
ENSGALG00000040185	16	16:254603-303146:-1		3.209	5.93209	0.540956
ADAMDEC1	22	22:1049690-1067955:-1	ADAM like decysin 1	0.6205	1.14705	0.540955
LOC101748666	.	.	uncharacterized LOC101748666	16.5547	30.6245	0.540569
ZPLD1	1	1:85567535-85586457:+1	zona pellucida-like domain containing 1	1.49767	2.77195	0.540293
C1S	1	1:77379603-77388708:+1	complement C1s	1.74	3.22132	0.540152
ABTB2	.	.	ankyrin repeat and BTB (POZ) domain containing 2	2.0945	3.88373	0.539302
ENSGALG00000003657	19	19:5722923-5726777:-1		1.551	2.88318	0.537947
ADTRP	2	2:63095842-63126232:+1	androgen-dependent TFPI-regulating protein	3.316	6.16609	0.53778
HAPLN3	10	10:13042626-13046863:+1	hyaluronan and proteoglycan link protein 3	1.0275	1.91127	0.5376
MTHFS	.	.	5,10-methenyltetrahydrofolate synthetase (5-formyltetrahydrofolate cyclo-ligase)	0.633	1.17836	0.537186
LOC107056270	.	.	BCL2/adenovirus E1B 19 kDa protein-interacting protein 3-like	4.64333	8.64705	0.536985
C27H17ORF105	.	.	chromosome 27 open reading frame, human C17orf105	2.05017	3.81941	0.536776
ENSGALG00000046316	27	27:3483420-3486566:-1		2.05017	3.81941	0.536776
ARHGEF9	4	4:11861715-11920370:+1	Cdc42 guanine nucleotide exchange factor (GEF) 9	1.52933	2.85214	0.536206
LOC107050755	.	.	pulmonary surfactant-associated protein B-like	0.8945	1.66827	0.536183
PRLH	7	7:4774972-4775907:-1	prolactin releasing hormone	96.2127	179.775	0.535182
ENSGALG00000004274	7	7:6127472-6157943:+1		0.620333	1.15923	0.535127
FADS1	.	.	fatty acid desaturase 1	1.057	1.97764	0.534476
ENSGALG00000044922	AADN04006260.1	AADN04006260.1:5298-6591:+1		2.9605	5.55227	0.533205
CREG2	1	1:133559659-133574827:-1	cellular repressor of E1A-stimulated genes 2	1.70983	3.21295	0.532169
ENSGALG00000036742	19	19:2515845-2605834:+1		3.22733	6.06727	0.531925
GPT2	11	11:7859581-7880632:-1	glutamic--pyruvic transaminase 2	7.04233	13.2418	0.531825
STON1	.	.	stonin 1	3.69533	6.96345	0.530675
SPA17	.	.	sperm autoantigenic protein 17	0.780833	1.47145	0.530654
FTD	5	5:12176613-12179659:+1		9.95633	18.7695	0.530453
LANCL3	1	1:113222082-113251614:-1	LanC like 3	1.239	2.33627	0.530332
IMPA2	2	2:97513654-97531725:-1	inositol(myo)-1(or 4)-monophosphatase 2	19.5082	36.7878	0.530289
LOC107055828	.	.	high affinity cationic amino acid transporter 1-like	0.878833	1.65777	0.530129
PDPN	.	.	podoplanin	173.995	328.435	0.529769
Enpp2	2	2:136612721-136668116:-1	ectonucleotide pyrophosphatase/phosphodiesterase 2	2.37	4.48005	0.529012
CLEC3A	11	11:14241342-14248273:+1	C-type lectin domain family 3 member A	66.1325	125.208	0.528179
ENSGALG00000030673	5	5:50123820-50126256:+1		48.3662	91.6238	0.527878
HS6ST2	4	4:3612123-3713509:-1	Heparan-sulfate 6-O-sulfotransferase 2	4.38867	8.32886	0.526923
MFAP3L	4	4:25476877-25481127:+1	microfibrillar-associated protein 3-like	1.11617	2.11877	0.526799
B4GALNT3	1	1:60369118-60426095:+1	beta-1,4-N-acetyl-galactosaminyl transferase 3	2.49017	4.72782	0.526705
BMP6	.	.	bone morphogenetic protein 6	8.966	17.03	0.526481
SLC39A14	AADN04002725.1	AADN04002725.1:8179-17083:+1	solute carrier family 39 (zinc transporter), member 14	11.8167	22.4493	0.526372
ENSGALG00000031853	10	10:7968924-7969340:+1		48.8518	92.8156	0.526332
ZDHHC2	.	.	zinc finger, DHHC-type containing 2	2.952	5.615	0.525735
ENSGALG00000040726	AADN04020798.1	AADN04020798.1:171-2678:-1		5.3995	10.271	0.525701
LMNA	.	.	lamin A/C	0.541833	1.03095	0.525565
TMEM74	2	2:132477229-132478179:-1	transmembrane protein 74	0.710333	1.35205	0.525377
SLC13A5	19	19:9799046-9813490:+1	solute carrier family 13 (sodium-dependent citrate transporter), member 5	4.15467	7.91168	0.525131
MGP	1	1:48052894-48058138:+1	matrix Gla protein	885.38	1687.9	0.524546
ENSGALG00000026137	Z	Z:78638971-78642380:-1		9.57733	18.2793	0.523944
ENSGALG00000019198	1	1:98870218-98957333:+1		1.91683	3.65918	0.523842
PCOLCE2	9	9:10574023-10593642:-1	procollagen C-endopeptidase enhancer 2	107.528	205.402	0.523501
Rchy1	4	4:34858221-34863084:+1	ring finger and CHY zinc finger domain containing 1	2.9615	5.65768	0.523448
C8H1orf226	.	.	chromosome 8 open reading frame, human C1orf226	1.49683	2.85982	0.523402
ENSGALG00000035031	2	2:121291569-121294409:-1		2.461	4.704	0.523172
ECM1	.	.	extracellular matrix protein 1	46.1758	88.2889	0.523009
ENSGALG00000030845	Z	Z:7905611-7907012:-1		1.3665	2.61532	0.522499
COBLL1	7	7:20140771-20213740:+1	cordon-bleu WH2 repeat protein-like 1	8.1955	15.7257	0.521154
ENSGALG00000034967	1	1:195016711-195176210:-1		2.52317	4.84382	0.520904
ENSGALG00000044919	5	5:50128497-50128922:+1		51.4015	98.834	0.520079
MYL1	7	7:2770680-2788461:-1	myosin light chain 1	2.39967	4.61832	0.519598
SEMA7A	10	10:2464702-2487049:+1	semaphorin 7A, GPI membrane anchor (John Milton Hagen blood group)	6.73517	12.9635	0.519547
KCNK12	3	3:8694188-8701812:-1	potassium two pore domain channel subfamily K member 12	1.178	2.26964	0.519026
SH3YL1	3	3:92246030-92274846:-1	SH3 and SYLF domain containing 1	1.36733	2.63586	0.518742
ARMC9	9	9:15252365-15303505:+1	armadillo repeat containing 9	6.2035	11.9753	0.518026
DENND2A	.	.	DENN/MADD domain containing 2A	0.755333	1.45918	0.517642
ENSGALG00000045728	AADN04007016.1	AADN04007016.1:2509-3958:-1		1.5815	3.05532	0.517622
BMP4	5	5:58698105-58700937:-1	bone morphogenetic protein 4	6.2435	12.0681	0.517354
CHGA	5	5:44953316-44963482:+1	chromogranin A	9.2265	17.8502	0.516884
ARHGEF4	9	9:2275486-2312749:-1	Rho guanine nucleotide exchange factor (GEF) 4	1.48717	2.87759	0.51681
LOC101750757	.	.	uncharacterized LOC101750757	1.04617	2.02595	0.516382
HEY1	.	.	hes-related family bHLH transcription factor with YRPW motif 1	1.29067	2.49955	0.516361
ENSGALG00000034321	1	1:48140149-48140520:-1		1.32433	2.56682	0.515944
SLC27A6	Z	Z:45636819-45675681:-1	solute carrier family 27 (fatty acid transporter), member 6	2.27733	4.42341	0.514837
LOC100858414	.	.	testican-2-like	4.132	8.03473	0.514268
IRF1	13	13:16977371-16983282:-1	interferon regulatory factor 1	7.382	14.3568	0.514182
TNFRSF11B	2	2:136408844-136425722:-1	tumor necrosis factor receptor superfamily, member 11b	2.57733	5.01423	0.514004
AOX1	7	7:11249381-11285636:+1	aldehyde oxidase 1	3.88867	7.56677	0.513914
SRSF2	.	.	serine/arginine-rich splicing factor 2	1.06867	2.08077	0.513591
PTPRK	3	3:58821365-59132416:+1	protein tyrosine phosphatase, receptor type, K	1.04733	2.0405	0.513273
MARCKSL1	23	23:5135541-5137290:+1	MARCKS like 1	6.6205	12.902	0.513139
ENSGALG00000041555	AADN04001035.1	AADN04001035.1:4863-11120:-1		79.8922	155.947	0.512302
DYNLRB2	11	11:15331182-15335926:+1	dynein light chain roadblock-type 2	6.02867	11.7818	0.511694
SDSL	15	15:12646831-12649000:-1	serine dehydratase like	0.5985	1.17027	0.511419
ENSGALG00000023882	3	3:3067765-3070648:-1		0.735667	1.43886	0.511283
ENSGALG00000035815	AADN04010707.1	AADN04010707.1:2017-4903:-1		0.735667	1.43886	0.511283
LOC107056166	.	.	MAL-like protein	0.735667	1.43886	0.511283
ENSGALG00000032522	1	1:59339115-59339510:-1		1.01267	1.98168	0.511014
TRPV4	15	15:6894024-6899794:-1	transient receptor potential cation channel subfamily V member 4	3.15983	6.185	0.510887
LOC107056443	.	.	signal recognition particle 54 kDa protein-like	0.835833	1.63641	0.510773
KIAA1211	4	4:65222692-65243920:-1	KIAA1211	0.966833	1.89355	0.510594
PXYLP1	9	9:6796763-6897692:+1	2-phosphoxylose phosphatase 1	12.0572	23.6253	0.510349
PCTP	18	18:6095734-6104125:+1	phosphatidylcholine transfer protein	3.9705	7.78455	0.510049
LOC107055574	.	.	platelet glycoprotein 4-like	15.7327	30.8502	0.50997
IL-17D	1	1:178832450-178832800:-1		1.28383	2.52018	0.509421
SEMA5B	7	7:26700264-26882259:-1	sema domain, seven thrombospondin repeats (type 1 and type 1-like), transmembrane domain (TM) and short cytoplasmic domain, (semaphorin) 5B	1.52833	3.004	0.508766
MBOAT2	3	3:96358528-96449224:-1	membrane bound O-acyltransferase domain containing 2	0.658667	1.29541	0.508462
SDC4	20	20:5273295-5288746:+1	syndecan 4	110.172	216.743	0.50831
EFCAB2	3	3:34744560-34755634:-1	EF-hand calcium binding domain 2	1.14267	2.25068	0.507698
HDHD5	1	1:61716796-61721741:-1	haloacid dehalogenase like hydrolase domain containing 5	0.603667	1.19123	0.50676
IHH	7	7:22427417-22435414:+1	Indian hedgehog protein Indian hedgehog protein N-product Indian hedgehog protein C-product	2.243	4.42873	0.506466
PRMT8	1	1:75168825-75220639:+1	protein arginine methyltransferase 8	0.606667	1.19873	0.506092
IL18BP	.	.	interleukin 18 binding protein	54.9287	108.803	0.504845
LOC101747958	.	.	uncharacterized LOC101747958	2.56883	5.10291	0.503406
DPEP1	11	11:18993604-18997174:+1	dipeptidase 1 (renal)	0.788	1.5675	0.502711
NRCAM	1	1:28579093-28718391:+1	neuronal cell adhesion molecule	2.24667	4.47868	0.501636
GLI2	7	7:25930783-26109391:+1	GLI family zinc finger 2	1.36933	2.72986	0.501612
ADAMTSL3	10	10:11480809-11655680:+1	ADAMTS-like 3	1.42433	2.8435	0.500909
WNT4	21	21:6322863-6334599:+1	Protein Wnt-4	2.06817	4.13036	0.500723
ENSGALG00000040332	1	1:75333290-75335460:+1		0.767833	1.53441	0.50041
LOC107055016	.	.	transcription elongation factor A protein 3-like	3.0755	6.15455	0.499712
UGP2	3	3:9554804-9577969:+1	UDP-glucose pyrophosphorylase 2	102.124	205.028	0.498099
DHRS3	21	21:5313102-5342428:+1	dehydrogenase/reductase 3	10.0055	20.091	0.498008
LOC107057309	.	.	adenosylhomocysteinase B-like	1.30883	2.62982	0.49769
STRBP	17	17:9383431-9417159:-1	spermatid perinuclear RNA binding protein	1.2175	2.44686	0.497576
PACAP	2	2:102121710-102124573:-1	adenylate cyclase activating polypeptide 1	1.67917	3.37495	0.497538
SAPCD2	.	.	suppressor APC domain containing 2	9.127	18.3595	0.497127
ENSGALG00000015577	Z	Z:64092962-64101313:+1		1.23167	2.48286	0.496067
LOC100859442	.	.	protein FAM151B-like	1.23167	2.48286	0.496067
TGM2	20	20:10568680-10578655:+1	protein-glutamine gamma-glutamyltransferase 2	14.5657	29.3837	0.495706
TM9SF3	.	.	transmembrane 9 superfamily member 3	1.52283	3.075	0.49523
ENC1	Z	Z:24273768-24275537:+1	ectodermal-neural cortex 1	4.35617	8.80386	0.494802
CDH19	2	2:95483121-95558733:+1	cadherin-19 precursor	0.576333	1.16577	0.494379
RP11-565P22.6	.	.	Uncharacterized protein	0.664833	1.34632	0.493816
NEXN	8	8:18971362-18998959:-1	nexilin (F actin binding protein)	1.19567	2.42386	0.49329
COL22A1	2	2:144646756-144875068:-1	collagen, type XXII, alpha 1	8.1955	16.6262	0.492927
LOC769421	.	.	heparan sulfate glucosamine 3-O-sulfotransferase 3B1-like	0.952333	1.93209	0.492903
LIF	15	15:10920686-10925689:+1	leukemia inhibitory factor	1.15683	2.35327	0.491585
LOC107049133	.	.	protein FAM71C-like	0.573167	1.16632	0.491433
ENSGALG00000033191	1	1:48099109-48099504:-1		3.97283	8.09764	0.490616
AC025263.3	.	.	Uncharacterized protein	4.444	9.06227	0.490385
ENSGALG00000041565	5	5:51814453-51829054:+1		1.65283	3.37605	0.489577
SGCG	1	1:177675863-177788671:-1	sarcoglycan gamma	0.951167	1.94845	0.488165
ENSGALG00000035662	AADN04005904.1	AADN04005904.1:7774-10047:+1		0.6465	1.33118	0.485659
LOC425531	.	.	ras-related protein Rab-18-B-like	19.4368	40.0458	0.485365
ENSGALG00000020876	7	7:11289758-11332344:+1		0.4955	1.0215	0.485071
ENSGALG00000045552	19	19:37973-39131:+1		0.5805	1.19823	0.484466
ENSGALG00000045783	19	19:4125-5285:-1		0.5805	1.19823	0.484466
PADI3	21	21:150867-156826:-1		0.504667	1.04291	0.483903
SLC38A3	12	12:3203801-3209305:-1	solute carrier family 38 member 3	6.13167	12.7213	0.482001
ENSGALG00000009092	3	3:7660647-7673710:-1		0.976667	2.02795	0.481602
MMP9	20	20:10773802-10777893:+1	matrix metalloproteinase-9 precursor	146.751	304.72	0.481591
OSGIN1	11	11:2658956-2694119:-1	oxidative stress induced growth inhibitor 1	81.4643	169.629	0.480251
KCNA3	26	26:1481250-1482992:-1	potassium voltage-gated channel subfamily A member 3	6.51383	13.5709	0.479987
SLC7A1	1	1:175461084-175479666:+1	solute carrier family 7 member 1	4.107	8.55841	0.479879
TBC1D9	4	4:29945818-29988757:-1	TBC1 domain family, member 9 (with GRAM domain)	2.74417	5.72427	0.479391
FBXL2	2	2:44747028-44782767:+1	F-box and leucine-rich repeat protein 2	11.5187	24.0615	0.478718
LOC107049470	.	.	protein MANBAL-like	36.8575	77.0341	0.478457
ENSGALG00000042519	AADN04000787.1	AADN04000787.1:22393-29696:-1		7.3715	15.4069	0.478456
SNX10	2	2:32275230-32308776:+1	sorting nexin 10	182.591	382.184	0.477758
ENSGALG00000014751	Z	Z:20383073-20519927:-1		2.662	5.57932	0.477119
LOC107054452	.	.	atherin-like	1.92883	4.04832	0.476453
EOGT	12	12:15302691-15316402:-1	EGF domain-specific O-linked N-acetylglucosamine (GlcNAc) transferase	9.37	19.6815	0.476083
LOC107049354	.	.	uncharacterized LOC107049354	0.608167	1.27759	0.476026
DOCK3	12	12:1967650-2179125:+1	dedicator of cytokinesis 3	0.537667	1.12977	0.475907
MDFI	.	.	MyoD family inhibitor	9.7535	20.5334	0.475006
COL10A1	3	3:64174068-64180744:+1	collagen type X alpha 1 chain	3385.45	7136.93	0.474357
LINGO1	10	10:2667332-2767927:+1	Leucine-rich repeat and immunoglobulin-like domain-containing nogo receptor-interacting protein 1	0.609833	1.28609	0.474176
ENSGALG00000015219	2	2:107995287-108042299:-1		0.639333	1.34895	0.473947
LOC100857837	.	.	ethanolaminephosphotransferase 1-like	0.639333	1.34895	0.473947
LOXL2	22	22:1213671-1249445:+1	lysyl oxidase-like 2	27.2745	57.5651	0.473803
FGL1	4	4:63266296-63284864:+1	fibrinogen like 1	6.80017	14.3537	0.473758
WNK4	27	27:5462100-5472837:+1	WNK lysine deficient protein kinase 4	4.23283	8.94332	0.473296
LOC422654	.	.	chemokine (C-X-C motif) ligand 1-like	49.5027	104.845	0.47215
LOC427029	.	.	uncharacterized LOC427029	20.6355	43.7175	0.472019
GABRA4	4	4:67356760-67392287:+1	gamma-aminobutyric acid (GABA) A receptor, alpha 4	0.690333	1.46977	0.469687
SHROOM3	.	.	shroom family member 3	1.10317	2.34932	0.469569
GALNT18	5	5:8307996-8518626:+1	polypeptide N-acetylgalactosaminyltransferase 18	2.77183	5.91536	0.468582
MRPL43	.	.	mitochondrial ribosomal protein L43	0.890833	1.90127	0.468546
SLC10A4	4	4:66871126-66872520:-1	solute carrier family 10 member 4	0.486667	1.03918	0.468317
SOX8	14	14:5774171-5777561:-1	SRY-box 8	3.19583	6.83341	0.467678
SNCB	13	13:10351272-10354618:+1	synuclein beta	0.864	1.84936	0.467188
KCNE2	1	1:105836791-105837168:+1	potassium voltage-gated channel subfamily E regulatory subunit 2	1.733	3.71177	0.466893
LPAR4	4	4:1409332-1423642:+1	lysophosphatidic acid receptor 4	10.0663	21.5645	0.4668
FAM19A2	1	1:32729364-32758798:-1	family with sequence similarity 19 (chemokine (C-C motif)-like), member A2	0.876	1.87723	0.466646
ATP9A	20	20:13326260-13374406:+1	ATPase, class II, type 9A	0.745667	1.59895	0.466346
LOC430731	.	.	zinc finger protein 226-like	0.594	1.27436	0.466115
SBSPON	2	2:118074519-118085414:-1	somatomedin B and thrombospondin type 1 domain containing	3.22817	6.93064	0.465782
CHIR-IG1-5	AADN04000910.1	AADN04000910.1:11479-14128:+1	Gallus gallus immunoglobulin-like receptor CHIR-AB1-like (CHIR-IG1-5), mRNA.	4.638	9.97827	0.46481
LDHD	11	11:2019039-2026719:-1	lactate dehydrogenase D	0.524667	1.129	0.464718
LAMA5	.	.	laminin, alpha 5	1.18533	2.56314	0.462454
FZD9	19	19:264594-266693:-1	frizzled class receptor 9	9.8175	21.2703	0.461559
COL24A1	.	.	collagen, type XXIV, alpha 1	2.657	5.77045	0.460449
PHACTR1	2	2:62437754-62509972:-1	phosphatase and actin regulator 1	1.871	4.07323	0.459341
ENSGALG00000041676	AADN04000849.1	AADN04000849.1:42122-45809:+1		0.923667	2.01086	0.459338
CHAC1	5	5:24438649-24440766:+1	ChaC glutathione specific gamma-glutamylcyclotransferase 1	7.8495	17.0888	0.459337
ENSGALG00000042063	2	2:46280772-46309732:-1		3.207	7.00736	0.457661
MEP1A	3	3:110335891-110348503:+1	meprin A subunit alpha	0.9815	2.14577	0.457411
ENSGALG00000033420	AADN04000745.1	AADN04000745.1:21-5551:-1		211.775	463.836	0.456574
LOC107049909	.	.	leukocyte immunoglobulin-like receptor subfamily A member 2	15.8985	34.8331	0.456419
COMP	28	28:3800421-3815388:+1	cartilage oligomeric matrix protein	6.74433	14.7801	0.456311
LOC420721	.	.	sushi domain-containing protein 5-like	13.1322	28.7882	0.456164
SUSD5	2	2:44661561-44704132:-1	sushi domain containing 5	13.1322	28.7882	0.456164
ENSGALG00000028709	3	3:95415555-95474483:+1		3.74817	8.22909	0.455478
ENSGALG00000003137	15	15:4781351-4792186:-1		3.1255	6.86918	0.455003
FAM101A	.	.	family with sequence similarity 101, member A	3.1255	6.86918	0.455003
ENSGALG00000046020	AADN04008550.1	AADN04008550.1:3361-5320:+1		2.35417	5.17895	0.454564
HUNK	1	1:104732138-104786820:+1	hormonally up-regulated Neu-associated kinase	2.40667	5.29995	0.454092
RNF144A	AADN04013900.1	AADN04013900.1:2033-5590:+1	ring finger protein 144A	7.74867	17.103	0.453058
COL11A1	.	.	collagen, type XI, alpha 1	123.772	273.345	0.452805
HOXD8	7	7:16355650-16357570:-1	homeobox D8	0.578333	1.27773	0.452627
STC2	13	13:9230034-9239581:-1	stanniocalcin 2	20.3343	45.0172	0.451702
CNMD	1	1:165707166-165718950:+1	chondromodulin	112.69	249.586	0.451506
FAM110B	2	2:112260278-112261390:+1	family with sequence similarity 110 member B	7.54967	16.8035	0.449293
KIF25	3	3:42197887-42223817:-1	kinesin family member 25	1.785	3.9785	0.448662
SCG5	5	5:30599800-30627920:-1	secretogranin V	0.959667	2.13959	0.448528
AIFM2	6	6:11988592-11993397:+1	apoptosis inducing factor, mitochondria associated 2	15.0337	33.5391	0.448243
CXCR7	.	.	chemokine (C-X-C motif) receptor 7	0.675333	1.51059	0.447066
CRYBA1	19	19:5961995-5965823:+1	crystallin, beta A1	0.473333	1.05882	0.447039
ACKR3	7	7:5036416-5041363:-1	atypical chemokine receptor 3	2.02583	4.53186	0.44702
MAT1A	6	6:4436646-4453363:+1	methionine adenosyltransferase 1A	2.65383	5.94282	0.446561
CENPV	.	.	centromere protein V	1.5	3.362	0.446163
B3GNT7	9	9:15318557-15320500:+1	UDP-GlcNAc:betaGal beta-1,3-N-acetylglucosaminyltransferase 7	0.9425	2.11514	0.445598
RASL11B	4	4:66369835-66373520:-1	RAS like family 11 member B	0.900833	2.02314	0.445266
ENSGALG00000019845	3	3:107891531-107894588:+1	Gallinacin-9	12.1222	27.2569	0.444738
HECW2	7	7:9831319-9937960:-1	HECT, C2 and WW domain containing E3 ubiquitin protein ligase 2	0.722833	1.62768	0.444088
ENSGALG00000037109	3	3:57585333-57609756:-1		8.71033	19.6929	0.442309
NGEF	9	9:1052566-1088975:-1	neuronal guanine nucleotide exchange factor	7.53417	17.0338	0.442308
ENSGALG00000030712	AADN04000776.1	AADN04000776.1:11-7373:+1		257.512	586.115	0.439355
ENSGALG00000035671	AADN04012479.1	AADN04012479.1:21-7205:+1		1.2125	2.76036	0.439254
GSC	5	5:45795960-45797259:-1	goosecoid homeobox	1.49483	3.40891	0.438508
ENSGALG00000045009	4	4:11449727-11450283:+1		0.606833	1.38441	0.438334
ENSGALG00000007418	24	24:5457626-5460103:-1		0.844833	1.928	0.438192
ENSGALG00000039040	3	3:3491081-3494823:-1		1.87733	4.29055	0.437551
PLXNB1	12	12:11332373-11363615:+1	plexin B1	0.878333	2.00877	0.437249
Id1	20	20:10207842-10209004:+1	inhibitor of DNA binding 1, HLH protein	9.938	22.7642	0.436563
LOC101751827	.	.	uncharacterized LOC101751827	0.871167	1.99814	0.43599
BTC	4	4:34879240-34884609:+1	betacellulin	0.582333	1.3405	0.434415
IL1B	.	.	interleukin 1, beta	1.64217	3.782	0.434206
LOC107057015	.	.	cyclin-F-like	2.02483	4.66909	0.433668
LOC417386	.	.	pyrroline-5-carboxylate reductase 2-like	2.6715	6.16618	0.43325
ENSGALG00000022815	3	3:107914855-107917298:-1	Gallinacin-1	36.0028	83.2511	0.432461
CA12	10	10:4027277-4045255:+1	carbonic anhydrase 12	1.02583	2.37214	0.432451
SLC39A8	4	4:61121025-61141216:-1	solute carrier family 39 (zinc transporter), member 8	4.67367	10.8281	0.431622
ENSGALG00000031168	AADN04013079.1	AADN04013079.1:858-5659:-1		1.1615	2.69486	0.431005
KCNK5	3	3:29274506-29304143:+1	potassium channel, two pore domain subfamily K, member 5	1.43733	3.34614	0.42955
C17orf67	18	18:6330246-6335894:-1	chromosome 17 open reading frame 67	10.6227	24.7367	0.429429
C18H17ORF67	.	.	chromosome 18 open reading frame, human C17orf67	10.6227	24.7367	0.429429
DUSP15	20	20:10270064-10277462:-1	dual specificity phosphatase 15	0.939667	2.19405	0.42828
PAPSS2	6	6:9643792-9663329:-1	3'-phosphoadenosine 5'-phosphosulfate synthase 2	10.593	24.7416	0.428145
SEMA4D	Z	Z:43599371-43624509:-1	sema domain, immunoglobulin domain (Ig), transmembrane domain (TM) and short cytoplasmic domain, (semaphorin) 4D	0.6565	1.53659	0.427244
COL9A1	3	3:83104826-83171007:+1	collagen, type IX, alpha 1	80.9202	189.551	0.426904
DDO	3	3:66719471-66724545:+1	D-aspartate oxidase	0.503	1.18355	0.424994
HPGDS	4	4:37449944-37475301:-1	Hematopoietic prostaglandin D synthase	85.5263	201.827	0.423762
ENSGALG00000038593	6	6:8090033-8090500:-1		0.485333	1.14786	0.422814
WFIKKN2	18	18:10189967-10193843:-1	WAP, follistatin/kazal, immunoglobulin, kunitz and netrin domain containing 2	2.23617	5.29241	0.422523
BAALC	2	2:129934284-129955820:+1	brain and acute leukemia, cytoplasmic	1.6875	3.99736	0.422153
CHADL	1	1:49788795-49792401:+1	chondroadherin like	4.0865	9.68995	0.421725
ENSGALG00000016651	3	3:107634880-107643339:+1		1.434	3.40286	0.42141
TDH	.	.	L-threonine dehydrogenase (pseudogene)	4.30183	10.2086	0.421392
GAL3ST1	15	15:10854317-10857168:+1	galactose-3-O-sulfotransferase 1	1.12183	2.66295	0.421274
CEMIP	10	10:12248442-12295841:-1	cell migration inducing protein, hyaluronan binding	2.49667	5.9445	0.419996
CHSY3	.	.	chondroitin sulfate synthase 3	0.952	2.26673	0.419989
PHGDH	8	8:4264703-4268005:-1	phosphoglycerate dehydrogenase	16.4108	39.1389	0.419297
HAPLN1	.	.	hyaluronan and proteoglycan link protein 1	50.875	121.372	0.419167
ENSGALG00000015627	Z	Z:62521046-62613868:+1	Hyaluronan and proteoglycan link protein 1	25.4373	60.6858	0.419164
HTR2B	9	9:15205069-15214169:-1	5-hydroxytryptamine receptor 2B	1.05617	2.52009	0.419099
ENSGALG00000029547	AADN04001512.1	AADN04001512.1:3912-18932:+1		6.5165	15.5841	0.418151
CDH3	.	.	cadherin 3, type 1, P-cadherin (placental)	2.94083	7.03341	0.418123
LOC101747531	.	.	uncharacterized LOC101747531	0.598167	1.43432	0.417039
NRIP3	5	5:9533204-9542338:+1	nuclear receptor interacting protein 3	0.629333	1.50927	0.416978
MATN1	23	23:245720-262706:-1	matrilin 1, cartilage matrix protein	285.325	685.457	0.416255
LAMA4	3	3:65864380-65965590:+1	laminin, alpha 4	2.87083	6.89918	0.416112
ENSGALG00000046426	26	26:1473742-1479846:-1		3.70633	8.91818	0.415593
CYP27A1	7	7:22543083-22545995:+1	cytochrome P450, family 27, subfamily A, polypeptide 1	0.8455	2.04636	0.413172
SHISA2	1	1:177058130-177061984:-1	shisa family member 2	0.9885	2.39464	0.412798
FAM237A	7	7:12480858-12488246:-1	family with sequence similarity 237 member A	0.518	1.25545	0.4126
LIMCH1	.	.	LIM and calponin homology domains 1	1.06117	2.58159	0.411051
COL9A3	20	20:8532484-8564351:+1	collagen type IX alpha 3 chain	89.4802	217.918	0.410614
ENSGALG00000019063	1	1:182479610-182486231:+1		21.0685	51.4173	0.409755
ENSGALG00000042670	AADN04006861.1	AADN04006861.1:3148-3762:+1		5.05967	12.3547	0.409533
TMEM9	26	26:901105-904818:+1	transmembrane protein 9	2.76667	6.77409	0.408419
ENSGALG00000045139	AADN04003351.1	AADN04003351.1:8467-9888:-1		0.7215	1.76841	0.407994
ENSGALG00000032524	AADN04007582.1	AADN04007582.1:4206-6488:-1		0.813333	2.00295	0.406067
ACAN	10	10:13047888-13091063:-1	aggrecan	109.163	268.895	0.405969
ENSGALG00000008381	7	7:11556161-11567751:-1	transmembrane protein 237	1.6875	4.16086	0.405565
KALRN	.	.	kalirin, RhoGEF kinase	0.856833	2.11295	0.405514
LOC107050830	.	.	uncharacterized LOC107050830	1.19217	2.94132	0.405317
LOC100859097	.	.	piwi-like protein 2-like	1.21683	3.00432	0.405028
EGFLAM	Z	Z:11954663-11993224:+1	EGF-like, fibronectin type III and laminin G domains	0.438	1.08264	0.404568
SLCO4C1	.	.	solute carrier organic anion transporter family, member 4C1	0.724667	1.79527	0.403653
LOC100857570	.	.	T-cell-interacting, activating receptor on myeloid cells protein 1-like	1.617	4.01214	0.403027
ENSGALG00000035354	KQ759661.1	KQ759661.1:21-10191:-1		4.801	11.939	0.402129
CDH7	2	2:95819538-95897002:-1	cadherin 7	1.06983	2.66136	0.401987
PTGER3	8	8:29200002-29207887:-1	prostaglandin E receptor 3	0.432667	1.07759	0.401513
ENSGALG00000014258	4	4:68881857-68944854:-1		3.89733	9.71109	0.401328
H2B-VIII	1	1:48111297-48111790:+1	Histone H2B 8	1.68733	4.2065	0.401125
SLC6A13	1	1:60262382-60287559:-1	solute carrier family 6 (neurotransmitter transporter), member 13	2.127	5.30645	0.400833
MEF2B	.	.	myocyte enhancer factor 2B	2.64983	6.62632	0.399895
EDQM3	25	25:1935535-1935835:-1		0.415667	1.04323	0.398443
ENSGALG00000038726	AADN04012218.1	AADN04012218.1:5623-5962:-1		0.461833	1.1615	0.397618
STK32C	6	6:34928043-34988049:-1	serine/threonine kinase 32C	0.6555	1.65768	0.395432
SOX9	18	18:8866456-8869366:+1	SRY-box 9	15.2418	38.57	0.395173
MME	9	9:23162941-23198332:-1	membrane metalloendopeptidase	0.953167	2.41286	0.395035
STEAP2	2	2:21695262-21701570:+1	STEAP2 metalloreductase	5.48883	13.9277	0.394094
DDIT4	6	6:11459153-11459905:-1	DNA damage inducible transcript 4	23.4245	59.803	0.391694
ENSGALG00000044953	AADN04001974.1	AADN04001974.1:15324-15892:-1		0.528833	1.35155	0.39128
LOC107051179	.	.	collagen alpha-2(XI) chain-like	153.325	394.31	0.388844
PRIMA1	5	5:45350875-45393576:-1	proline rich membrane anchor 1	15.9038	41.0579	0.387352
GFPT2	13	13:13929617-13940653:+1	glutamine-fructose-6-phosphate transaminase 2	18.2483	47.1539	0.386995
ENSGALG00000031058	18	18:2602232-2623842:-1		0.844333	2.18186	0.386978
ENSGALG00000036483	1	1:48102939-48103334:+1		0.9245	2.39209	0.386482
ENSGALG00000044822	AADN04001807.1	AADN04001807.1:13467-14790:+1		0.4265	1.10364	0.38645
LPPR5	.	.	lipid phosphate phosphatase-related protein type 5	0.479333	1.24068	0.386347
DHDH	AADN04000777.1	AADN04000777.1:34106-38591:-1	dihydrodiol dehydrogenase	0.478833	1.24	0.386156
FNDC5	23	23:5294114-5304982:-1	fibronectin type III domain containing 5	4.5975	11.9146	0.385871
PLIN1	10	10:12822224-12826841:+1	perilipin 1	2.832	7.35382	0.385106
ID4	2	2:59931746-59933580:-1	inhibitor of DNA binding 4, HLH protein	8.695	22.5973	0.384781
EMID1	.	.	EMI domain containing 1	3.90417	10.1512	0.384602
ENSGALG00000032405	AADN04000661.1	AADN04000661.1:61202-67038:-1		0.4675	1.21555	0.384601
ENSGALG00000040434	27	27:3486934-3491821:-1		5.87617	15.2791	0.384588
RELN	1	1:13046276-13318877:-1	reelin	0.386333	1.00555	0.384203
ENSGALG00000032483	AADN04000861.1	AADN04000861.1:6888-18744:+1		1.33417	3.47423	0.384018
LOC107050698	.	.	DNA-directed RNA polymerase II subunit rpb1-like	4.0735	10.6122	0.383851
ENSGALG00000035803	1	1:192940017-192941458:+1		6.62733	17.3834	0.381245
COCH	5	5:34263828-34280520:+1	cochlin	46.283	121.536	0.380817
SLC16A9	.	.	solute carrier family 16, member 9	0.671833	1.76923	0.379733
TOR1B	.	.	torsin family 1, member B (torsin B)	1.093	2.88564	0.378773
LOC100859854	.	.	T-cell-interacting, activating receptor on myeloid cells protein 1-like	4.42967	11.7065	0.378394
SNCA	4	4:35648927-35715824:-1	synuclein alpha	1.59583	4.21973	0.378184
ENSGALG00000002102	10	10:1312987-1314180:-1		1.8095	4.8065	0.376469
LOC107056802	.	.	vacuolar protein sorting-associated protein 33B-like	1.044	2.77432	0.376309
OSR1	3	3:101468989-101473526:-1	odd-skipped related transciption factor 1	0.513	1.36386	0.376137
LOC426344	.	.	translation initiation factor IF-2-like	0.669	1.78041	0.375756
FAM110D	23	23:3204812-3205849:-1	family with sequence similarity 110 member D	1.20017	3.19695	0.375409
NLGN3	4	4:2335565-2353557:-1	neuroligin 3	1.15867	3.09532	0.374329
SSTR2	18	18:9063416-9065697:+1	somatostatin receptor 2	1.11483	2.99986	0.371628
ENSGALG00000027207	3	3:54675180-54684330:+1		0.4045	1.0915	0.370591
ENSGALG00000029569	2	2:458816-461126:-1		0.926667	2.50345	0.370155
LOC429682	.	.	GTPase IMAP family member 7-like	0.926667	2.50345	0.370155
CD9	1	1:74491375-74515119:+1	CD9 molecule	21.898	59.2048	0.369869
MMD2	14	14:4047604-4058713:-1	monocyte to macrophage differentiation associated 2	0.402833	1.09036	0.369449
TGM4	2	2:43317611-43328122:-1	transglutaminase 4	0.4355	1.18041	0.36894
SOD3	4	4:74158334-74159793:-1	superoxide dismutase 3	4.70067	12.7672	0.368182
ENSGALG00000032272	1	1:48099163-48099621:+1		0.915	2.48691	0.367927
ENSGALG00000035445	1	1:48102824-48103259:-1		0.915	2.48691	0.367927
HIST1H4D	.	.	histone cluster 1, H4d	0.915	2.48691	0.367927
ENSGALG00000045267	18	18:10200806-10202658:+1		1.06767	2.91595	0.366147
ENSGALG00000030700	AADN04000910.1	AADN04000910.1:33288-35381:-1		6.37933	17.4382	0.365825
LOC107056588	.	.	transmembrane 9 superfamily member 3-like	2.1555	5.89427	0.365694
ENSGALG00000043064	17	17:992193-995196:-1		2188.85	6003.08	0.364621
SLN	1	1:180517078-180519001:+1	sarcolipin	1.4175	3.89636	0.363801
LRAT	4	4:20559675-20561135:+1	lecithin retinol acyltransferase (phosphatidylcholine--retinol O-acyltransferase)	6.14667	16.9932	0.361713
TMEM47	1	1:113937248-113961367:+1	transmembrane protein 47	7.78267	21.5925	0.360435
LOC100857302	.	.	T-cell-interacting, activating receptor on myeloid cells protein 1-like	0.816833	2.26814	0.360134
CTNNA2	.	.	catenin (cadherin-associated protein), alpha 2	0.420667	1.17077	0.359307
ENSGALG00000045580	3	3:23378026-23379976:+1		0.814833	2.26805	0.359267
ENSGALG00000046341	AADN04005084.1	AADN04005084.1:11536-13240:-1		1.6165	4.51491	0.358036
C15orf48	10	10:10666581-10670187:+1	chromosome 15 open reading frame 48	186.767	521.673	0.358015
CHAD	18	18:10445470-10453126:+1	chondroadherin	29.2907	81.853	0.357845
ZNF385B	7	7:14980081-15028066:+1	zinc finger protein 385B	4.854	13.5723	0.35764
LTBP2	5	5:37973837-38033648:-1	latent transforming growth factor beta binding protein 2	1.31417	3.67473	0.357623
F13A1	2	2:65247235-65305803:+1	coagulation factor XIII A chain	134.852	377.097	0.357607
WBSCR27	.	.	Williams Beuren syndrome chromosome region 27	0.7625	2.16132	0.352794
PCP4	1	1:108164030-108196164:+1	Purkinje cell protein 4	5.11617	14.6143	0.35008
LOC101751846	.	.	meiotic recombination protein REC8 homolog	1.54567	4.43864	0.34823
NPY2R	4	4:20701889-20706043:+1	neuropeptide Y receptor Y2	0.433	1.26205	0.343094
ENSGALG00000033918	AADN04012984.1	AADN04012984.1:5209-6918:+1		2.35133	6.873	0.342112
SEMA3A	1	1:8824964-8995709:+1	sema domain, immunoglobulin domain (Ig), short basic domain, secreted, (semaphorin) 3A	3.90367	11.4509	0.340905
LOC425878	.	.	leukocyte immunoglobulin-like receptor subfamily A member 2-like	7.769	22.7984	0.34077
ENSGALG00000004096	10	10:6597145-6637179:-1		0.761667	2.23559	0.3407
CCL5	19	19:395344-396508:-1	C-C motif chemokine ligand 5	57.3562	168.4	0.340595
ENSGALG00000019755	18	18:10510367-10511097:-1		58.9835	173.263	0.340428
LPPR1	.	.	lipid phosphate phosphatase-related protein type 1	1.3565	3.987	0.340231
PLPPR1	Z	Z:65137559-65264849:-1	phospholipid phosphatase related 1	4.0695	11.9611	0.340228
ENSGALG00000029540	6	6:2588224-2600945:-1		0.395667	1.16414	0.33988
LOC101749030	.	.	leukocyte immunoglobulin-like receptor subfamily A member 2-like	8.11583	24.0866	0.336944
LOC100859063	.	.	uncharacterized LOC100859063	0.376833	1.12	0.336458
LOC101751171	.	.	germin-like protein subfamily 2 member 2-like	8.9245	26.5601	0.336011
EVA1C	1	1:104968387-104988771:+1	eva-1 homolog C (C. elegans)	1.722	5.13109	0.335601
LOC100859367	.	.	exostosin-1b-like	1.63183	4.87068	0.335032
WISP2	20	20:5488264-5491556:-1	WNT1 inducible signaling pathway protein 2	0.466667	1.39482	0.334572
RSPO4	20	20:10087796-10091507:+1	R-spondin 4	0.45	1.34541	0.334471
ENSGALG00000041228	8	8:21098127-21099524:-1		3.88433	11.6788	0.332596
LGI2	4	4:74060566-74080775:+1	leucine-rich repeat LGI family, member 2	1.3635	4.10768	0.331939
DENND5B	.	.	DENN/MADD domain containing 5B	0.457333	1.37909	0.331619
SLC7A11	4	4:29140501-29195218:-1	solute carrier family 7 member 11	1.53683	4.67818	0.328511
EXTL1	23	23:3229056-3234549:-1	exostosin like glycosyltransferase 1	1.57167	4.78609	0.328382
LOC107055540	.	.	uncharacterized LOC107055540	2.51617	7.68791	0.327289
TMEM61	8	8:25348716-25353446:+1	transmembrane protein 61	6.83683	21.0293	0.32511
PPP1R14C	3	3:48472735-48523004:+1	protein phosphatase 1, regulatory (inhibitor) subunit 14C	1.98583	6.11036	0.324994
ENSGALG00000035691	AADN04007092.1	AADN04007092.1:4529-5955:-1		0.6235	1.92114	0.324547
LOC107049143	.	.	C-type lectin domain family 2 member I-like	1.53467	4.74841	0.323196
SLC22A16	3	3:66681777-66712311:+1	solute carrier family 22 member 16	6.09417	18.9681	0.321285
ENSGALG00000040348	3	3:9364321-9374378:+1		0.9095	2.83836	0.320431
CCK	2	2:43988980-43993653:-1	cholecystokinin	1.756	5.48382	0.320215
LOC107049819	.	.	leukocyte immunoglobulin-like receptor subfamily B member 3	3.31967	10.444	0.317855
GJB1	4	4:2330650-2333141:-1	gap junction protein beta 1	1.04167	3.27886	0.317691
ENSGALG00000026899	Z	Z:45139013-45283428:-1		0.532333	1.69327	0.314381
ENSGALG00000030967	AADN04001776.1	AADN04001776.1:5688-14714:-1		16.5108	52.8423	0.312455
DDIT3	.	.	DNA-damage-inducible transcript 3	11.1273	35.658	0.312058
ENSGALG00000031518	AADN04000923.1	AADN04000923.1:10155-11488:+1		11.1273	35.658	0.312058
ENSGALG00000032574	AADN04003691.1	AADN04003691.1:2835-7718:-1		3.60683	11.7503	0.306956
LOC107051216	.	.	immunoglobulin superfamily member 1-like	1.27033	4.14959	0.306135
il-1beta	22	22:4616890-4618940:-1		7.31567	24.0785	0.303826
ENSGALG00000028858	26	26:3145547-3149510:+1		0.3345	1.10136	0.303714
ENSGALG00000002383	Z	Z:9066089-9069222:-1		6.58033	21.669	0.303676
ENSGALG00000030952	1	1:109672729-109674225:-1		1.40467	4.63118	0.303306
TFPI2	2	2:23330575-23335279:-1	tissue factor pathway inhibitor 2	6.52917	21.6097	0.302141
C2orf82	9	9:1045745-1052220:+1	chromosome 2 open reading frame 82	8.13333	26.9629	0.301649
CST7	3	3:15825416-15830701:+1	cystatin F	7.15117	23.7542	0.301049
LOC107049469	.	.	uncharacterized LOC107049469	15.54	51.6223	0.301033
ENSGALG00000029684	AADN04015694.1	AADN04015694.1:71-5337:-1		0.686	2.28123	0.300715
ALDH1L2	1	1:54341803-54369311:+1	aldehyde dehydrogenase 1 family, member L2	1.87767	6.2565	0.300115
GPR56	.	.	G protein-coupled receptor 56	0.409333	1.377	0.297265
COL8A1	1	1:84257313-84344008:-1	collagen type VIII alpha 1 chain	0.428167	1.44682	0.295937
TMEM233	15	15:9703185-9709834:-1	transmembrane protein 233	0.302833	1.02877	0.294364
LOC107051296	.	.	free fatty acid receptor 2-like	0.536167	1.824	0.293951
FAM150B	.	.	family with sequence similarity 150, member B	0.640167	2.1875	0.292648
CD72AG	.	.	CD72 antigen	0.400167	1.37655	0.290704
COL9A2	23	23:4887092-4897385:-1	collagen type IX alpha 2 chain	25.561	88.1168	0.290081
BTBD19	8	8:20861919-20867316:+1	BTB (POZ) domain containing 19	1.12283	3.88586	0.288953
LOC776275	.	.	UPF0444 transmembrane protein C12orf23 homolog	0.595167	2.0855	0.285383
ENSGALG00000043435	AADN04000612.1	AADN04000612.1:7-3871:-1		0.661	2.31636	0.285361
CA14	.	.	carbonic anhydrase XIV	0.329	1.16418	0.282602
HSD11B1a	.	.	hydroxysteroid (11-beta) dehydrogenase 1a	0.4105	1.45309	0.282501
MOB3B	Z	Z:68630255-68662403:-1	MOB kinase activator 3B	0.448833	1.63673	0.274226
LOC101750594	.	.	beta-microseminoprotein A1-like	3.11683	11.5553	0.269733
MSMB	6	6:17836546-17840466:+1	microseminoprotein beta	3.11683	11.5553	0.269733
ENSGALG00000012044	4	4:57097275-57432432:-1		0.578667	2.16373	0.26744
PMP2	2	2:121965362-121969801:-1	peripheral myelin protein 2	0.572667	2.15318	0.265963
ENSGALG00000044955	AADN04002399.1	AADN04002399.1:10417-11599:+1		1.9805	7.50964	0.263728
ENSGALG00000038876	AADN04006715.1	AADN04006715.1:4936-9671:+1		0.877833	3.35132	0.261937
BRICD5	.	.	BRICHOS domain containing 5	0.403167	1.55559	0.259173
ENSGALG00000045501	AADN04002385.1	AADN04002385.1:3404-5554:+1		0.3285	1.27091	0.258476
CHL1	12	12:17238314-17341991:+1	cell adhesion molecule L1-like	4.28167	16.8308	0.254395
NRN1	2	2:65344349-65351803:+1	neuritin 1	2.757	11.1245	0.247831
ENSGALG00000044662	AADN04001456.1	AADN04001456.1:16536-22488:+1		0.2535	1.02682	0.246879
C2orf88	7	7:192383-196571:-1	chromosome 2 open reading frame 88	3.746	15.32	0.244518
LOC107049150	.	.	uncharacterized LOC107049150	0.248667	1.02336	0.24299
CYP27C1	.	.	cytochrome P450, family 27, subfamily C, polypeptide 1	0.523167	2.16509	0.241637
LOC107056595	.	.	cytochrome P450 27C1-like	0.523167	2.16509	0.241637
ITIH5	1	1:4154034-4199469:-1	inter-alpha-trypsin inhibitor heavy chain family, member 5	0.281167	1.17105	0.240099
CCL20	9	9:9539782-9541879:+1	C-C motif chemokine ligand 20	1.15767	4.82445	0.239958
ENSGALG00000029209	AADN04000790.1	AADN04000790.1:33391-34819:-1		2.4265	10.1784	0.238397
ENSGALG00000044041	AADN04001394.1	AADN04001394.1:10155-11243:-1		0.564	2.40209	0.234795
LOC107050224	.	.	natural cytotoxicity triggering receptor 1-like	0.337167	1.45091	0.232383
SORCS1	6	6:25131956-25417009:-1	sortilin-related VPS10 domain containing receptor 1	0.454333	1.96718	0.230956
GALNT14	3	3:7780875-7845223:+1	UDP-N-acetyl-alpha-D-galactosamine:polypeptide N-acetylgalactosaminyltransferase 14 (GalNAc-T14)	0.976	4.229	0.230787
ENSGALG00000042023	AADN04000814.1	AADN04000814.1:22708-25722:-1		13.7153	59.8456	0.229179
LOC107049732	.	.	uncharacterized LOC107049732	2.7375	11.9564	0.228958
HS3ST1	4	4:78622367-78623329:+1	heparan sulfate-glucosamine 3-sulfotransferase 1	0.2325	1.03223	0.225241
NOS2	19	19:9218216-9237392:-1	nitric oxide synthase 2	2.66183	11.8881	0.223907
GRIN3A	Z	Z:65006350-65073206:+1	glutamate ionotropic receptor NMDA type subunit 3A	1.82383	8.34691	0.218504
STEAP4	2	2:21036209-21042939:-1	STEAP4 metalloreductase	8.60333	39.5526	0.217516
ENSGALG00000046112	AADN04004495.1	AADN04004495.1:2967-3482:+1		0.46	2.15209	0.213746
ENSGALG00000045607	4	4:35246046-35247365:-1		0.2175	1.02691	0.211801
ENSGALG00000046648	AADN04001137.1	AADN04001137.1:11509-12906:+1		0.435667	2.05764	0.211732
TINAGL1	23	23:4973978-4979571:+1	tubulointerstitial nephritis antigen-like 1	0.4395	2.08464	0.210828
HPS5	.	.	Hermansky-Pudlak syndrome 5	42.029	204.268	0.205755
ENSGALG00000046285	AADN04010162.1	AADN04010162.1:5681-7312:+1		1.36633	6.68541	0.204375
BATF3	3	3:21845131-21847685:+1	basic leucine zipper transcription factor, ATF-like 3	1.21583	6.043	0.201197
SLC12A2	Z	Z:56691802-56743665:+1	solute carrier family 12 (sodium/potassium/chloride transporter), member 2	1.21417	6.0555	0.200506
MLKL	11	11:1946273-1950045:-1	mixed lineage kinase domain-like	0.2215	1.12186	0.197439
CLEC5A	.	.	C-type lectin domain family 5, member A	1.7715	8.9905	0.197041
TAL2	Z	Z:55084980-55085333:+1	TAL bHLH transcription factor 2	0.397667	2.14573	0.18533
ENSGALG00000001371	18	18:2837333-2861145:+1		0.562333	3.10614	0.181039
CHODL	1	1:99543952-99573128:+1	chondrolectin	0.247167	1.36659	0.180864
CYTL1	4	4:79471991-79474709:-1	cytokine like 1	6.21717	34.52	0.180103
CAPN6	4	4:13384418-13431218:+1	calpain 6	0.199833	1.11195	0.179714
LOC101751308	.	.	uncharacterized LOC101751308	0.512167	2.87718	0.17801
LOC107056791	.	.	unconventional myosin-IXa-like	0.181	1.02582	0.176445
MPZL2	24	24:5442228-5447809:-1	myelin protein zero-like 2	0.419833	2.46	0.170664
PDE6H	1	1:47994367-48000190:-1	phosphodiesterase 6H	0.4495	2.66595	0.168608
ENSGALG00000011532	7	7:23778486-23795514:+1		0.264	1.56632	0.168548
ENSGALG00000038123	AADN04001947.1	AADN04001947.1:2993-19939:+1		0.264	1.56632	0.168548
LOC426070	.	.	immunoglobulin superfamily member 1-like	0.225167	1.34382	0.167557
ENSGALG00000031956	AADN04000861.1	AADN04000861.1:28734-30164:-1		3.24433	19.6052	0.165483
ENSGALG00000038656	AADN04000814.1	AADN04000814.1:15162-41970:+1		0.443333	2.72027	0.162974
ENSGALG00000026297	1	1:182491148-182499165:+1		0.1925	1.25368	0.153548
ARHGEF33	3	3:16592567-16613165:+1	Rho guanine nucleotide exchange factor (GEF) 33	1.142	7.7425	0.147498
ENSGALG00000044297	AADN04015857.1	AADN04015857.1:1076-2342:+1		0.6425	4.40509	0.145854
LOC100858620	.	.	C-type lectin domain family 2 member L-like	0.349333	2.47832	0.140956
ENSGALG00000034792	AADN04001974.1	AADN04001974.1:13901-15002:-1		0.230167	1.689	0.136274
LOC107056348	.	.	ankyrin-2-like	0.174167	1.33055	0.130899
ENSGALG00000010338	4	4:35247822-35249204:-1		0.4185	3.2225	0.129868
LOC107050375	.	.	coiled-coil domain-containing protein 81-like	0.147	1.14182	0.128742
ENSGALG00000037297	2	2:66509408-66510421:-1		0.145667	1.16282	0.12527
APELA	4	4:23934181-23936941:+1	apelin receptor early endogenous ligand	0.22	1.78473	0.123268
S100A8	25	25:1885186-1886619:+1	S100 calcium binding protein A8	1.72083	14.2868	0.120449
PROK2	12	12:16338395-16342937:-1	prokineticin 2	0.901167	7.51868	0.119857
ENSGALG00000002329	19	19:4765354-4766571:+1		1.552	13.7883	0.112559
ENSGALG00000046630	AADN04001974.1	AADN04001974.1:7744-9554:+1		0.415667	3.78536	0.109809
ENSGALG00000037683	AADN04006678.1	AADN04006678.1:7506-8933:-1		0.748	7.01314	0.106657
LOC772271	.	.	aldo-keto reductase family 1 member B10-like	0.217333	2.0925	0.103863
ENSGALG00000045401	AADN04003084.1	AADN04003084.1:4417-5684:+1		0.138167	1.35486	0.101978
CD72	.	.	CD72 molecule	0.4055	4.12086	0.0984017
LOC101752219	.	.	sodium/potassium ATPase inhibitor SPAI-2-like	0.979	10.2003	0.0959778
LAMP5	3	3:13942840-13952475:-1	lysosomal associated membrane protein family member 5	0.200333	2.3795	0.0841914
RBP4	6	6:20385382-20390788:+1	retinol binding protein 4	0.291833	3.59205	0.0812443
ENSGALG00000023622	Z	Z:9164721-9165903:+1	Avidin	126.484	1632.72	0.077468
LOC107052494	.	.	GTPase IMAP family member 7-like	0.234667	3.47605	0.0675097
HTR1E	3	3:76904838-76905953:-1	5-hydroxytryptamine receptor 1E	0.304167	4.61986	0.0658389
ENSGALG00000000081	16	16:205312-210738:-1		0.128	1.97214	0.0649042
ENSGALG00000030380	AADN04000612.1	AADN04000612.1:98789-99811:-1		0.7175	11.6347	0.0616691
IL13RA2	4	4:2848848-2864846:-1	interleukin 13 receptor, alpha 2	1.43817	25.3743	0.0566781
ENSGALG00000027716	5	5:12488069-12489867:-1		10.074	180.047	0.0559522
AVPR2	1	1:28505731-28507926:-1	arginine vasopressin receptor 2	0.114833	2.31664	0.049569
LYZ	1	1:35425914-35429601:+1	Lysozyme C	0.996	20.5326	0.0485082
ENSGALG00000042254	6	6:10798932-10805484:+1		0.0598333	1.23768	0.0483431
ENSGALG00000044644	AADN04005292.1	AADN04005292.1:3547-4816:+1		0.0601667	1.38514	0.0434374
ENSGALG00000038754	AADN04010109.1	AADN04010109.1:4447-7640:-1		0.356833	9.46682	0.0376931
ENSGALG00000044490	AADN04000989.1	AADN04000989.1:19719-21333:-1		0.055	1.70255	0.0323046
ENSGALG00000046549	AADN04000790.1	AADN04000790.1:15057-16030:-1		0.0493333	2.19432	0.0224823
CSF3	27	27:4737417-4739289:+1	Myelomonocytic growth factor	0.1055	4.92555	0.0214189
ENSGALG00000040577	AADN04004889.1	AADN04004889.1:6006-7439:+1		0.0095	1.93168	0.00491799
ENSGALG00000045656	AADN04004634.1	AADN04004634.1:3602-11659:-1		0.145667	45.92	0.00317218
ENSGALG00000011687	5	5:51898823-51911235:-1		0.0035	1.32418	0.00264314
IL4	13	13:17043941-17045665:+1	interleukin 4 precursor	0.0206667	12.2759	0.00168351
IL6RA	.	.	interleukin 6 receptor alpha	0.00116667	1.15459	0.00101046
LOC107057349	.	.	ER membrane protein complex subunit 1-like	0	6.48059	0
ETHE1	.	.	ethylmalonic encephalopathy 1	0	1.30327	0
LOC107050784	.	.	leukocyte immunoglobulin-like receptor subfamily A member 6	0	1.16582	0

## Sheet: Family H + LPS
LPS treatment of BMDMs
									Functional annotation enrichment analysis
Gene name	Chr	Location (chr:start-end:strand)	Description	Average in Family H	Average in other families	Family H/ other families			DAVID analysis
LOC107050037	.	.	platelet glycoprotein VI-like	13.5492	0.0766538	176.758			Down in H+Y3J2J3:X4J3:W3J3:X3J3:Y3J3:Z3	Annotation Cluster 1	Enrichment Score: 7.91663569354342
ENSGALG00000046163	AADN04003708.1	AADN04003708.1:11941-13914:-1		1.8065	0.0755385	23.915				Category	Term	Count	%	PValue	Genes	List Total	Pop Hits	Pop Total	Fold Enrichment	Bonferroni	Benjamini	FDR
UPP1	2	2:80187888-80197535:+1	uridine phosphorylase 1	577.736	24.2023	23.8711				UP_SEQ_FEATURE	signal peptide	44	3.93912	4.73901e-11	FGFR2, VIP, K123, CCK, FGFR3, LY86, TNC, FGFRL1, FST, GREM1, SDC4, MDK, IL10, NOV, NRCAM, COL9A1, WNT4, COL9A2, APOA1, COL9A3, EOGT, IFNG, SEMA3D, ACAN, UNC5C, SEMA3A, THBS2, TSKU, SPON1, EGFR, IL4, COCH, CD3E, MATN1, SDK2, MGP, FRZB, MOXD1, AVBD8, NPY, LSAMP, NGFR, IGFBP2, EPYC	77	484	2162	2.55254	1.78187e-08	1.78187e-08	6.55047e-08
LOC107049379	.	.	coiled-coil domain-containing protein 81-like	6.34883	0.303615	20.9108				UP_SEQ_FEATURE	disulfide bond	34	3.04387	4.1628e-09	FGFR2, FGFR3, TNC, FGFRL1, FST, SORL1, NEO1, GREM1, MDK, IL10, NRCAM, NOV, COL9A1, COL9A2, SEMA3D, ACAN, PTN, UNC5C, SEMA3A, THBS2, SPON1, EGFR, COCH, HAPLN1, SDK2, MATN1, MGP, FRZB, MOXD1, AVBD8, LSAMP, NGFR, EPYC, IGFBP2	77	340	2162	2.80779	1.56521e-06	7.82607e-07	5.754e-06
LOC101749724	.	.	uncharacterized LOC101749724	6.767	0.337769	20.0344				UP_KEYWORDS	Disulfide bond	68	6.08774	7.18101e-09	HEXA, LY86, FGFRL1, SORL1, FST, ANPEP, LOC101750245, DNASE1L3, IL10, NOV, NRCAM, WNT4, LOC420721, CPA2, SEMA3D, UNC5C, SEMA3A, SPON1, HTR1E, EGFR, COCH, EGFL7, MATN1, SDK2, MGP, MMP13, MOXD1, PCOLCE2, LOC418892, AVBD8, LSAMP, ADAM19, NGFR, EPYC, FGFR2, C7, WFIKKN2, WNT16, ADAMTS19, FGFR3, TNC, NEO1, GREM1, MDK, COL9A1, COL9A2, COMP, ACAN, PTN, FGL1, THBS2, GALNT14, GABRD, HAPLN1, COL4A2, COL4A1, …	422	896	11626	2.09083	1.46493e-06	4.88309e-07	9.02984e-06
ENSGALG00000043977	AADN04002120.1	AADN04002120.1:14277-17174:+1		2.73083	0.179769	15.1908				UP_SEQ_FEATURE	glycosylation site:N-linked (GlcNAc...)	35	3.13339	2.21218e-07	FGFR2, FGFR3, TNC, FGFRL1, FST, SORL1, NEO1, CDH3, SDC4, GREM1, NRCAM, NOV, WNT4, COL9A3, EOGT, IFNG, SEMA3D, ACAN, HS6ST2, UNC5C, SEMA3A, THBS2, TSKU, SPON1, EGFR, COCH, HAPLN1, MATN1, SDK2, FRZB, MOXD1, CNGA1, LSAMP, NGFR, EPYC	77	417	2162	2.35666	8.31745e-05	2.77256e-05	0.000305776
ENSGALG00000044712	LGE64	LGE64:840103-842999:+1		2.73083	0.179769	15.1908				UP_KEYWORDS	Glycoprotein	41	3.67055	8.33185e-07	FGFR2, FGFR3, TNC, CPQ, FGFRL1, SORL1, FST, ANPEP, NEO1, CDH3, SDC4, APCDD1, GREM1, NOV, GPC4, NRCAM, WNT4, COL9A2, COL9A3, EOGT, IFNG, SEMA3D, ACAN, HS6ST2, UNC5C, SEMA3A, THBS2, TSKU, SPON1, EGFR, COCH, MINPP1, HAPLN1, MATN1, SDK2, FRZB, MOXD1, CNGA1, LSAMP, NGFR, EPYC	422	483	11626	2.33859	0.000169955	3.39934e-05	0.00104769
ENSGALG00000045184	AADN04001767.1	AADN04001767.1:9066-11961:+1		2.73083	0.179769	15.1908
ENSGALG00000032403	25	25:1889768-1890103:+1		82.1862	5.67935	14.4711				Annotation Cluster 2	Enrichment Score: 4.032611950548015
EGFL6	1	1:123018708-123059075:-1	EGF like domain multiple 6	2.36817	0.168885	14.0224				Category	Term	Count	%	PValue	Genes	List Total	Pop Hits	Pop Total	Fold Enrichment	Bonferroni	Benjamini	FDR
LOC107049383	.	.	uncharacterized LOC107049383	1.33233	0.102115	13.0473				SMART	SM00210:TSPN	7	0.626679	2.78449e-05	COL9A1, COL21A1, TSPEAR, COL22A1, COL24A1, COL11A1, THBS2	234	17	5997	10.5528	0.00524893	0.00524893	0.0345717
ENSGALG00000044174	AADN04004098.1	AADN04004098.1:3556-5680:-1		2.17283	0.166538	13.047				INTERPRO	IPR001791:Laminin G domain	9	0.80573	0.000113783	COL9A1, LAMA4, COL21A1, TSPEAR, LAMA5, COL22A1, COL24A1, COL11A1, THBS2	397	43	11164	5.88577	0.0883608	0.0131289	0.174884
LOC101749549	.	.	coiled-coil domain-containing protein 81-like	1.28067	0.104115	12.3005				INTERPRO	IPR013320:Concanavalin A-like lectin/glucanase, subgroup	14	1.25336	0.000251965	PTPRK, PTPRM, COL21A1, TSPEAR, LGALS2, COL22A1, COL9A1, LAMA4, LAMA5, COMP, COL24A1, PTX3, THBS2, COL11A1	397	117	11164	3.36489	0.18525	0.0252841	0.386885
LOC101749614	.	.	uncharacterized LOC101749614	2.6225	0.257231	10.1951
ST6GALNAC2	18	18:4348911-4354952:+1	ST6 N-acetylgalactosaminide alpha-2,6-sialyltransferase 2	4.64133	0.502769	9.23154				Annotation Cluster 3	Enrichment Score: 3.235831470677124
LOC107050390	.	.	natural cytotoxicity triggering receptor 1-like	8.0455	0.979308	8.2155				Category	Term	Count	%	PValue	Genes	List Total	Pop Hits	Pop Total	Fold Enrichment	Bonferroni	Benjamini	FDR
ENSGALG00000044103	AADN04000971.1	AADN04000971.1:28666-29368:+1		11.5407	1.52404	7.57242				INTERPRO	IPR013783:Immunoglobulin-like fold	36	3.22292	6.03361e-07	FGFR2, IL1R2, WFIKKN2, MPZL2, FGFR3, TNC, F13A1, FGFRL1, SORL1, NEO1, VCAM1, NRCAM, FNDC5, TGM2, SEMA3D, ACAN, TGM4, UNC5C, SEMA3A, VWA1, HAPLN1, CHIR-IG1-5, PTPRK, PTPRM, CD3E, RIMBP2, SDK2, NEXN, EPHA1, NDNF, MMP23B, LSAMP, CD79B, JAM2, MYLK, CHL1	397	397	11164	2.55001	0.000490412	0.000245236	0.000928118
ENSGALG00000044482	AADN04010229.1	AADN04010229.1:3466-8168:-1		1.70367	0.251	6.78752				UP_KEYWORDS	Immunoglobulin domain	16	1.43241	4.15056e-06	FGFR2, IL1R2, HAPLN1, PTPRM, FGFR3, CD3E, FGFRL1, SDK2, NEO1, NRCAM, LSAMP, ACAN, SEMA3D, UNC5C, SEMA3A, MYLK	422	103	11626	4.27957	0.000846358	0.000141109	0.00521904
ENSGALG00000033176	AADN04003671.1	AADN04003671.1:3600-5694:-1		3.324	0.489808	6.78634				INTERPRO	IPR007110:Immunoglobulin-like domain	26	2.32766	1.51791e-05	FGFR2, IL1R2, WFIKKN2, MPZL2, FGFR3, FGFRL1, NEO1, NRCAM, VCAM1, SEMA3D, ACAN, UNC5C, SEMA3A, HAPLN1, CHIR-IG1-5, PTPRK, PTPRM, SDK2, NEXN, SLAMF1, MMP23B, LSAMP, CD79B, JAM2, CHL1, MYLK	397	275	11164	2.6587	0.0122649	0.00308043	0.0233468
ENSGALG00000044876	AADN04002305.1	AADN04002305.1:6292-8727:+1		6.99183	1.077	6.49195				UP_SEQ_FEATURE	domain:Ig-like C2-type 3	8	0.716204	2.53579e-05	FGFR2, NRCAM, FGFR3, LSAMP, FGFRL1, SDK2, NEO1, MYLK	77	27	2162	8.31938	0.00948938	0.00238083	0.035045
ENSGALG00000045481	AADN04005143.1	AADN04005143.1:8429-10875:+1		4.97017	0.7665	6.48424				INTERPRO	IPR003599:Immunoglobulin subtype	22	1.96956	3.57338e-05	FGFR2, WFIKKN2, HAPLN1, PTPRK, IL1R2, CHIR-IG1-5, FGFR3, MPZL2, PTPRM, FGFRL1, SDK2, NEO1, NEXN, NRCAM, VCAM1, LSAMP, ACAN, CD79B, SEMA3A, UNC5C, CHL1, MYLK	397	220	11164	2.81209	0.0286341	0.00579356	0.0549535
LOC101749412	.	.	coiled-coil domain-containing protein 81-like	1.08483	0.171385	6.32982				INTERPRO	IPR013098:Immunoglobulin I-set	15	1.34288	3.63193e-05	FGFR2, WFIKKN2, PTPRK, FGFR3, FGFRL1, SDK2, NEO1, NEXN, NRCAM, VCAM1, LSAMP, CD79B, UNC5C, CHL1, MYLK	397	111	11164	3.80012	0.0290964	0.00490926	0.0558537
ENSGALG00000039602	AADN04006989.1	AADN04006989.1:7863-9705:+1		2.124	0.336	6.32143				UP_SEQ_FEATURE	domain:Ig-like C2-type 1	8	0.716204	8.34037e-05	FGFR2, NRCAM, FGFR3, LSAMP, FGFRL1, SDK2, NEO1, MYLK	77	32	2162	7.01948	0.0308744	0.00625259	0.115222
ENSGALG00000045515	2	2:373417-374786:-1		4.63433	0.775962	5.97238				UP_SEQ_FEATURE	domain:Ig-like C2-type 2	8	0.716204	0.000102899	FGFR2, NRCAM, FGFR3, LSAMP, FGFRL1, SDK2, NEO1, MYLK	77	33	2162	6.80677	0.037953	0.00642792	0.142137
CHIR-A2	AADN04001512.1	AADN04001512.1:12541-23130:-1	Gallus gallus immunoglobulin-like receptor CHIR-A2 (CHIR-A2), mRNA.	6.004	1.01458	5.91774				SMART	SM00409:IG	22	1.96956	0.000111443	FGFR2, WFIKKN2, HAPLN1, PTPRK, IL1R2, CHIR-IG1-5, FGFR3, MPZL2, PTPRM, FGFRL1, SDK2, NEO1, NEXN, NRCAM, VCAM1, LSAMP, ACAN, CD79B, SEMA3A, UNC5C, CHL1, MYLK	234	220	5997	2.56282	0.0208435	0.0104766	0.138299
ENSGALG00000028843	25	25:986332-987425:+1		1.27283	0.221269	5.75242				INTERPRO	IPR003598:Immunoglobulin subtype 2	13	1.16383	0.00486393	FGFR2, WFIKKN2, FGFR3, SDK2, FGFRL1, NEO1, NRCAM, VCAM1, LSAMP, UNC5C, JAM2, CHL1, MYLK	397	143	11164	2.55645	0.981013	0.246589	7.22585
LOC426913	.	.	feather keratin 1-like	1.27283	0.221269	5.75242				SMART	SM00408:IGc2	13	1.16383	0.00937179	FGFR2, WFIKKN2, FGFR3, SDK2, FGFRL1, NEO1, NRCAM, VCAM1, LSAMP, UNC5C, JAM2, CHL1, MYLK	234	143	5997	2.32984	0.831298	0.199447	11.0349
C1QL1	27	27:1479940-1484015:-1	complement C1q like 1	28.4612	5.22942	5.44251				GOTERM_MF_DIRECT	GO:0005007~fibroblast growth factor-activated receptor activity	3	0.268577	0.011559	FGFR2, FGFR3, FGFRL1	302	5	8532	16.951	0.988884	0.474166	14.9035
ENSGALG00000043874	AADN04001761.1	AADN04001761.1:6415-8862:-1		8.9085	1.72077	5.17705				UP_SEQ_FEATURE	domain:Fibronectin type-III 5	4	0.358102	0.0168096	NRCAM, TNC, SDK2, NEO1	77	16	2162	7.01948	0.998295	0.439803	20.8895
ENSGALG00000032792	7	7:6965787-6967477:-1		1.56533	0.304	5.14912				UP_SEQ_FEATURE	domain:Ig-like C2-type 4	4	0.358102	0.0232912	NRCAM, SDK2, NEO1, MYLK	77	18	2162	6.23954	0.999858	0.522133	27.8013
ENSGALG00000023742	7	7:6580483-6603208:+1		1.2075	0.234654	5.14588				UP_SEQ_FEATURE	domain:Fibronectin type-III 4	4	0.358102	0.0397645	NRCAM, TNC, SDK2, NEO1	77	22	2162	5.10508	1	0.663708	42.9286
ENSGALG00000046537	AADN04008545.1	AADN04008545.1:3733-4825:+1		3.36117	0.654462	5.13577				UP_SEQ_FEATURE	domain:Ig-like C2-type 6	3	0.268577	0.0844818	NRCAM, SDK2, MYLK	77	14	2162	6.0167	1	0.841778	70.478
ENSGALG00000030981	AADN04008640.1	AADN04008640.1:1734-2131:-1		1.03967	0.205154	5.06774				UP_SEQ_FEATURE	domain:Ig-like C2-type 5	3	0.268577	0.118092	NRCAM, SDK2, MYLK	77	17	2162	4.95493	1	0.916832	82.3957
LOC101749141	.	.	leukocyte immunoglobulin-like receptor subfamily A member 2-like	1.76383	0.350769	5.02847
ARHGEF28	Z	Z:24570223-24702341:-1	Rho guanine nucleotide exchange factor 28	2.1675	0.432808	5.008				Annotation Cluster 4	Enrichment Score: 3.1148438593971326
CD28	7	7:13495614-13507829:-1	CD28 molecule	1.37617	0.278885	4.93454				Category	Term	Count	%	PValue	Genes	List Total	Pop Hits	Pop Total	Fold Enrichment	Bonferroni	Benjamini	FDR
CHIR-AB1	AADN04002388.1	AADN04002388.1:13338-15950:-1	immunoglobulin-like receptor CHIR-AB1 precursor	6.27867	1.3255	4.73683				UP_KEYWORDS	Transmembrane	137	12.265	0.000317886	SLC22A16, MPZL2, SLC44A3, AQP9, FGFRL1, LPAR4, GRIN3A, SLC7A5, NRCAM, ATP2B2, ADTRP, ST3GAL5, CD44, FAP, ST3GAL6, PHTF1, SMIM5, UNC5C, HTR1E, EGFR, CHIR-IG1-5, PTPRK, PTPRM, ABCB11, CD3E, GPR132, CD40, MOXD1, CNGA1, LOC107049470, CCR7, LAT2, LHFPL5, LRAT, FAM18B1, HAS2, VAMP2, TM6SF1, LOC100859798, FGFR2, SLC38A4, PAM, IL1R2, SLC38A3, LPPR5, FGFR3, ENPP1, DRD3, SYNDIG1, ENPP3, ITGA11, MME, KMO, P…	422	2899	11626	1.30194	0.0628005	0.00922279	0.398995
ENSGALG00000013101	16	16:245788-249541:-1		13.1653	2.78938	4.7198				UP_KEYWORDS	Transmembrane helix	136	12.1755	0.000417164	SLC22A16, MPZL2, SLC44A3, AQP9, FGFRL1, LPAR4, GRIN3A, SLC7A5, NRCAM, ATP2B2, ADTRP, ST3GAL5, CD44, FAP, ST3GAL6, PHTF1, SMIM5, UNC5C, HTR1E, EGFR, CHIR-IG1-5, PTPRK, PTPRM, ABCB11, CD3E, GPR132, CD40, MOXD1, CNGA1, LOC107049470, CCR7, LAT2, LHFPL5, LRAT, FAM18B1, HAS2, VAMP2, TM6SF1, LOC100859798, FGFR2, SLC38A4, PAM, IL1R2, SLC38A3, LPPR5, FGFR3, ENPP1, DRD3, SYNDIG1, ENPP3, ITGA11, MME, KMO, P…	422	2891	11626	1.29601	0.0815972	0.0105835	0.523303
ENSGALG00000033747	AADN04002022.1	AADN04002022.1:13506-14474:+1		10.3198	2.21646	4.65599				UP_KEYWORDS	Membrane	147	13.1603	0.000447372	SLC22A16, MPZL2, SLC44A3, AQP9, FGFRL1, LPAR4, GRIN3A, SLC7A5, NRCAM, ATP2B2, ADTRP, ST3GAL5, CD44, FAP, ST3GAL6, PHTF1, SMIM5, UNC5C, HTR1E, EGFR, CHIR-IG1-5, PTPRK, PTPRM, ABCB11, CD3E, GPR132, CD40, MOXD1, CNGA1, LOC107049470, CCR7, LAT2, LHFPL5, LRAT, LSAMP, HAS2, FAM18B1, VAMP2, TM6SF1, LOC100859798, FGFR2, SLC38A4, PAM, IL1R2, PALM, SLC38A3, LPPR5, FGFR3, ENPP1, DRD3, SYNDIG1, ENPP3, ITGA11…	422	3177	11626	1.27473	0.0872418	0.00908689	0.561098
FOXI3	4	4:86624887-86627842:-1	forkhead box I3	1.61833	0.350962	4.61114				GOTERM_CC_DIRECT	GO:0016021~integral component of membrane	108	9.66876	0.00585298	MPZL2, SLC44A3, AQP9, FGFRL1, LPAR4, SLC7A5, NRCAM, ADTRP, CD44, FAP, PHTF1, SMIM5, UNC5C, EGFR, PTPRK, CHIR-IG1-5, PTPRM, ABCB11, CD3E, GPR132, CD40, MOXD1, LOC107049470, CCR7, LHFPL5, LAT2, LRAT, FAM18B1, VAMP2, TM6SF1, FGFR2, PAM, IL1R2, FGFR3, ENPP1, ENPP3, MME, KMO, PANX3, SFXN1, ZPLD1, ECE2, FAM213A, LOC428714, B3GNT7, PRIMA1, TRAM1, GAL3ST1, BEAN1, GABRD, GPR158, GABRA4, SCD, TGFBR1, SLAMF…	368	2357	10057	1.25223	0.718595	0.223992	7.17955
LOC417973	.	.	uncharacterized LOC417973	43.3802	9.50788	4.56255
ENSGALG00000044116	AADN04016688.1	AADN04016688.1:2392-4381:+1		1.23183	0.290462	4.24095				Annotation Cluster 5	Enrichment Score: 2.8898261257170015
LOC107055383	.	.	uncharacterized LOC107055383	6.60417	1.56265	4.22625				Category	Term	Count	%	PValue	Genes	List Total	Pop Hits	Pop Total	Fold Enrichment	Bonferroni	Benjamini	FDR
ENSGALG00000040094	AADN04009907.1	AADN04009907.1:3124-5402:+1		5.4205	1.31908	4.10931				GOTERM_MF_DIRECT	GO:0030247~polysaccharide binding	7	0.626679	3.42015e-07	SBSPON, NRCAM, ENPP1, ENPP2, ENPP3, VTN, TINAGL1	302	10	8532	19.7762	0.000132351	0.000132351	0.000474749
ENSGALG00000011859	1	1:49180327-49185207:-1		1.08667	0.269923	4.02584				INTERPRO	IPR001212:Somatomedin B domain	6	0.537153	2.8078e-06	SBSPON, ENPP1, ENPP2, ENPP3, VTN, TINAGL1	397	8	11164	21.0907	0.00228014	0.000760626	0.00431902
BLB1	16	16:116646-118450:+1		56.331	14.4574	3.89635				GOTERM_MF_DIRECT	GO:0005044~scavenger receptor activity	8	0.716204	2.34077e-05	SBSPON, ENPP1, ENPP2, ENPP3, CXCR7, VTN, TINAGL1, SCARA5	302	26	8532	8.69282	0.00901797	0.0045192	0.0324873
ENSGALG00000028016	1	1:49189519-49197004:-1		9.62183	2.51738	3.82215				GOTERM_BP_DIRECT	GO:0006955~immune response	15	1.34288	5.75419e-05	IL4, SBSPON, FYB, C7, CCR7, CXCL14, ENPP1, ENPP2, ENPP3, IL1B, VTN, CD40, NGFR, TINAGL1, IL10	341	109	8994	3.62964	0.0788337	0.0788337	0.0949885
ENSGALG00000044714	2	2:15888370-15892729:-1		25.2627	6.68115	3.78118				SMART	SM00201:SO	4	0.358102	0.000546426	ENPP1, ENPP2, ENPP3, VTN	234	5	5997	20.5026	0.098146	0.025495	0.676427
ENSGALG00000007003	17	17:4069259-4077367:+1		1.39033	0.370346	3.75415				INTERPRO	IPR020821:Extracellular Endonuclease, subunit A	4	0.358102	0.00139362	K123, ENPP1, ENPP2, ENPP3	397	7	11164	16.0691	0.678192	0.118366	2.12239
HSPA12B	.	.	heat shock 70kD protein 12B	9.62183	2.60404	3.69497				INTERPRO	IPR001604:DNA/RNA non-specific endonuclease	4	0.358102	0.00139362	K123, ENPP1, ENPP2, ENPP3	397	7	11164	16.0691	0.678192	0.118366	2.12239
PLACL2	.	.	Placenta-specific gene 8-like 2	57.3932	15.8398	3.62334				SMART	SM00892:SM00892	4	0.358102	0.00180449	K123, ENPP1, ENPP2, ENPP3	234	7	5997	14.6447	0.289195	0.0553047	2.21784
ENSGALG00000030320	16	16:398725-481487:-1		4.40133	1.21688	3.61689				SMART	SM00477:NUC	4	0.358102	0.00180449	K123, ENPP1, ENPP2, ENPP3	234	7	5997	14.6447	0.289195	0.0553047	2.21784
LOC101751375	.	.	T-cell-interacting, activating receptor on myeloid cells protein 1-like	1.78067	0.492808	3.61331				GOTERM_MF_DIRECT	GO:0004551~nucleotide diphosphatase activity	3	0.268577	0.00363487	ENPP1, ENPP2, ENPP3	302	3	8532	28.2517	0.755675	0.209331	4.92912
BG2	.	.	intestinal zipper protein	10.1655	2.83008	3.59195				GOTERM_MF_DIRECT	GO:0004528~phosphodiesterase I activity	3	0.268577	0.00363487	ENPP1, ENPP2, ENPP3	302	3	8532	28.2517	0.755675	0.209331	4.92912
LOC107050521	.	.	leukocyte immunoglobulin-like receptor subfamily B member 1	1.32583	0.375962	3.52651				INTERPRO	IPR024873:Ectonucleotide pyrophosphatase/phosphodiesterase family	3	0.268577	0.0171238	ENPP1, ENPP2, ENPP3	397	6	11164	14.0605	0.999999	0.504462	23.3322
ENSGALG00000037007	AADN04019142.1	AADN04019142.1:371-1402:+1		6.71733	1.91342	3.51064				INTERPRO	IPR002591:Type I phosphodiesterase/nucleotide pyrophosphatase/phosphate transferase	3	0.268577	0.0304974	ENPP1, ENPP2, ENPP3	397	8	11164	10.5453	1	0.634765	37.9003
ENSGALG00000033680	AADN04000838.1	AADN04000838.1:20255-39824:-1	Gallus gallus MHC-like class I Y (LOC768350), mRNA.	3.28083	0.937538	3.49941				INTERPRO	IPR017850:Alkaline-phosphatase-like, core domain	4	0.358102	0.0516463	ENPP1, ENPP2, ENPP3, ARSI	397	24	11164	4.68682	1	0.740042	55.7671
CDKN2A	Z	Z:78627025-78636973:-1		35.0838	10.1567	3.45424				INTERPRO	IPR017849:Alkaline phosphatase-like, alpha/beta/alpha	4	0.358102	0.0516463	ENPP1, ENPP2, ENPP3, ARSI	397	24	11164	4.68682	1	0.740042	55.7671
ENSGALG00000046430	AADN04003821.1	AADN04003821.1:8647-14334:+1		20.1977	5.87708	3.43669				GOTERM_MF_DIRECT	GO:0003676~nucleic acid binding	8	0.716204	0.704014	SALL3, K123, OSR1, ENPP1, ENPP2, ENPP3, LOC107049264, ZNF423	302	229	8532	0.986957	1	0.999999	100
CHIR-B6	.	.	immunoglobulin-like receptor CHIR-B6	12.4582	3.80896	3.27075
ENSGALG00000031048	AADN04006867.1	AADN04006867.1:6853-9324:+1		14.828	4.56227	3.25014				Annotation Cluster 6	Enrichment Score: 2.254560444740044
ENSGALG00000042997	AADN04001456.1	AADN04001456.1:8026-10496:-1		14.828	4.56227	3.25014				Category	Term	Count	%	PValue	Genes	List Total	Pop Hits	Pop Total	Fold Enrichment	Bonferroni	Benjamini	FDR
NELL1	5	5:2201059-2481132:+1	NEL-like 1 (chicken)	1.449	0.448846	3.22828				INTERPRO	IPR008160:Collagen triple helix repeat	13	1.16383	2.98974e-07	C1QTNF8, COL9A1, COL9A2, COL4A2, COL9A3, COL4A1, COL21A1, COL22A1, COL24A1, COL11A1, SCARA5, COL8A2, COL10A1	397	54	11164	6.76985	0.000243037	0.000243037	0.000459897
C26H6ORF106	.	.	chromosome 26 open reading frame, human C6orf106	2.48417	0.772154	3.21719				UP_KEYWORDS	Collagen	8	0.716204	0.000437523	COL9A1, C1QTNF8, COL9A2, COL4A2, COL4A1, COL9A3, COL8A2, COL10A1	422	39	11626	5.65123	0.0854053	0.00987033	0.548777
ENSGALG00000033025	12	12:16432433-16463366:-1		9.37017	2.91523	3.21421				GOTERM_CC_DIRECT	GO:0005581~collagen trimer	6	0.537153	0.0073262	COL9A1, C1QTNF8, COL9A2, COL9A3, COL8A2, COL10A1	368	34	10057	4.82273	0.795724	0.232575	8.91025
RYBP	.	.	RING1 and YY1 binding protein	9.37017	2.91523	3.21421				UP_KEYWORDS	Hydroxylation	4	0.358102	0.0543367	COL9A1, COL9A2, COL9A3, COL10A1	422	24	11626	4.59163	0.999989	0.434396	50.4668
LOC420486	.	.	mycocerosic acid synthase-like	22.6512	7.10012	3.19025				INTERPRO	IPR008983:Tumour necrosis factor-like domain	4	0.358102	0.0959161	C1QTNF8, TNFSF4, COL8A2, COL10A1	397	31	11164	3.6285	1	0.877786	78.7979
LOC107056791	.	.	unconventional myosin-IXa-like	3.73317	1.18165	3.15927				SMART	SM00110:C1Q	3	0.268577	0.181171	C1QTNF8, COL8A2, COL10A1	234	20	5997	3.84423	1	0.87739	91.643
ENSGALG00000033584	AADN04004058.1	AADN04004058.1:1375-4447:-1		18.6645	5.93885	3.14278				INTERPRO	IPR001073:Complement C1q protein	3	0.268577	0.182595	C1QTNF8, COL8A2, COL10A1	397	22	11164	3.83467	1	0.973816	95.5016
LOC427201	.	.	rho-guanine nucleotide exchange factor-like	3.01833	0.961308	3.13982
NEURL1B	13	13:8924782-8949939:-1	neuralized E3 ubiquitin protein ligase 1B	12.4702	3.97992	3.13327				Annotation Cluster 7	Enrichment Score: 2.251823388838253
LOC107050974	.	.	glycogen phosphorylase, muscle form-like	1.44983	0.465962	3.11149				Category	Term	Count	%	PValue	Genes	List Total	Pop Hits	Pop Total	Fold Enrichment	Bonferroni	Benjamini	FDR
ADAMTS1	1	1:103028117-103033674:-1	ADAM metallopeptidase with thrombospondin type 1 motif 1	3.259	1.04758	3.11099				INTERPRO	IPR000884:Thrombospondin, type 1 repeat	7	0.626679	0.00384674	SBSPON, NOV, C7, ADAMTS19, UNC5C, THBS2, SPON1	397	43	11164	4.57782	0.956432	0.247878	5.75635
ENSGALG00000010903	4	4:45907175-45909884:+1		6.78833	2.20204	3.08275				SMART	SM00209:TSP1	7	0.626679	0.00523199	SBSPON, NOV, C7, ADAMTS19, UNC5C, THBS2, SPON1	234	42	5997	4.27137	0.628959	0.132062	6.3064
ENSGALG00000042211	AADN04024548.1	AADN04024548.1:21-995:-1		3.42767	1.11196	3.08254				UP_SEQ_FEATURE	domain:TSP type-1 1	3	0.268577	0.00698994	UNC5C, THBS2, SPON1	77	4	2162	21.0584	0.928456	0.313932	9.24051
DUSP1	13	13:9052099-9054704:-1	dual specificity phosphatase 1	77.6655	25.3817	3.0599				UP_SEQ_FEATURE	domain:TSP type-1 2	3	0.268577	0.00698994	UNC5C, THBS2, SPON1	77	4	2162	21.0584	0.928456	0.313932	9.24051
LOC100858385	.	.	platelet glycoprotein VI-like	3.48017	1.1405	3.05144
CDCP1	2	2:43219475-43240492:+1	CUB domain containing protein 1	5.86167	1.94492	3.01383				Annotation Cluster 8	Enrichment Score: 1.9769273495629753
KIF9	2	2:3971607-3992312:-1	kinesin family member 9	13.0918	4.35446	3.00653				Category	Term	Count	%	PValue	Genes	List Total	Pop Hits	Pop Total	Fold Enrichment	Bonferroni	Benjamini	FDR
KYNU	.	.	kynureninase	5.40133	1.80115	2.99882				SMART	SM00060:FN3	14	1.25336	0.000473127	NRCAM, PTPRK, FNDC5, PTPRM, TNC, SDK2, RIMBP2, SORL1, NEO1, VWA1, EPHA1, MYLK, NDNF, CHL1	234	115	5997	3.11996	0.0855588	0.029374	0.585934
LOC107055776	.	.	erythroblast NAD(P)(+)--arginine ADP-ribosyltransferase-like	1.085	0.363385	2.98582				INTERPRO	IPR003961:Fibronectin, type III	14	1.25336	0.00192657	NRCAM, PTPRK, FNDC5, PTPRM, TNC, SDK2, RIMBP2, SORL1, NEO1, VWA1, EPHA1, MYLK, NDNF, CHL1	397	145	11164	2.71512	0.791499	0.145109	2.92284
ENSGALG00000019325	1	1:49197217-49205179:+1		2.79617	0.936654	2.98527				UP_SEQ_FEATURE	domain:Fibronectin type-III 2	6	0.537153	0.00951928	NRCAM, TNC, SDK2, RIMBP2, SORL1, NEO1	77	38	2162	4.43336	0.972578	0.362084	12.3843
ENSGALG00000037794	AADN04001643.1	AADN04001643.1:10499-11719:+1		19.1445	6.46296	2.96219				UP_SEQ_FEATURE	domain:Fibronectin type-III 1	6	0.537153	0.00951928	NRCAM, TNC, SDK2, RIMBP2, SORL1, NEO1	77	38	2162	4.43336	0.972578	0.362084	12.3843
ENSGALG00000045445	AADN04001186.1	AADN04001186.1:11979-14595:+1		13.3833	4.52258	2.95923				UP_SEQ_FEATURE	domain:Fibronectin type-III 3	5	0.447628	0.0101766	NRCAM, TNC, SDK2, RIMBP2, NEO1	77	25	2162	5.61558	0.978635	0.347755	13.1846
FAM131B	1	1:77586269-77592786:+1	family with sequence similarity 131, member B	1.193	0.403615	2.95578				UP_SEQ_FEATURE	domain:Fibronectin type-III 5	4	0.358102	0.0168096	NRCAM, TNC, SDK2, NEO1	77	16	2162	7.01948	0.998295	0.439803	20.8895
LOC107052493	.	.	GTPase IMAP family member 7-like	2.86867	0.985308	2.91144				UP_SEQ_FEATURE	domain:Ig-like C2-type 4	4	0.358102	0.0232912	NRCAM, SDK2, NEO1, MYLK	77	18	2162	6.23954	0.999858	0.522133	27.8013
ENSGALG00000041342	AADN04002022.1	AADN04002022.1:2190-3441:-1		7.78617	2.67558	2.91009				UP_KEYWORDS	Cell adhesion	9	0.80573	0.0284356	NRCAM, TNC, LSAMP, SDK2, ITGA11, NEO1, CDH3, THBS2, SPON1	422	100	11626	2.47948	0.997219	0.324518	30.4239
LOC431003	.	.	E3 ubiquitin-protein ligase KCMF1-like	4.3075	1.48215	2.90624				UP_SEQ_FEATURE	domain:Fibronectin type-III 4	4	0.358102	0.0397645	NRCAM, TNC, SDK2, NEO1	77	22	2162	5.10508	1	0.663708	42.9286
ENSGALG00000033897	AADN04006143.1	AADN04006143.1:9011-11484:+1		6.99717	2.44431	2.86264				UP_SEQ_FEATURE	domain:Fibronectin type-III 6	3	0.268577	0.0457138	TNC, SDK2, NEO1	77	10	2162	8.42338	1	0.690535	47.6267
ENSGALG00000031101	AADN04002932.1	AADN04002932.1:12045-14308:-1		2.38383	0.834462	2.85673
CHIR-B4	AADN04006143.1	AADN04006143.1:4321-6234:-1	Gallus gallus immunoglobulin-like receptor CHIR-B4 (CHIR-B4), mRNA.	6.73367	2.37954	2.82982				Annotation Cluster 9	Enrichment Score: 1.6609485016407513
SKA1	.	.	spindle and kinetochore associated complex subunit 1	124.487	44.2952	2.8104				Category	Term	Count	%	PValue	Genes	List Total	Pop Hits	Pop Total	Fold Enrichment	Bonferroni	Benjamini	FDR
C15orf62	5	5:970577-971107:+1	chromosome 15 open reading frame 62	4.49317	1.61965	2.77415				UP_SEQ_FEATURE	domain:Ig-like C2-type 3	8	0.716204	2.53579e-05	FGFR2, NRCAM, FGFR3, LSAMP, FGFRL1, SDK2, NEO1, MYLK	77	27	2162	8.31938	0.00948938	0.00238083	0.035045
C5H15ORF62	.	.	chromosome 5 open reading frame, human C15orf62	8.98683	3.23954	2.77411				UP_SEQ_FEATURE	domain:Ig-like C2-type 1	8	0.716204	8.34037e-05	FGFR2, NRCAM, FGFR3, LSAMP, FGFRL1, SDK2, NEO1, MYLK	77	32	2162	7.01948	0.0308744	0.00625259	0.115222
ITGA2	Z	Z:15862498-15924378:+1	integrin, alpha 2 (CD49B, alpha 2 subunit of VLA-2 receptor)	1.0125	0.367808	2.7528				UP_SEQ_FEATURE	domain:Ig-like C2-type 2	8	0.716204	0.000102899	FGFR2, NRCAM, FGFR3, LSAMP, FGFRL1, SDK2, NEO1, MYLK	77	33	2162	6.80677	0.037953	0.00642792	0.142137
ENSGALG00000038590	AADN04006105.1	AADN04006105.1:2186-8743:+1		2.89683	1.05254	2.75224				UP_SEQ_FEATURE	active site:Proton acceptor	4	0.358102	0.614338	FGFR2, FGFR3, ALDOB, MYLK	77	89	2162	1.26193	1	1	99.9998
P2RX7	15	15:5458325-5469803:+1	purinergic receptor P2X, ligand gated ion channel, 7	13.0333	4.78677	2.72278				UP_SEQ_FEATURE	domain:Protein kinase	3	0.268577	0.667087	FGFR2, FGFR3, MYLK	77	64	2162	1.31615	1	1	100
SOCS1	14	14:8984236-8984944:+1	suppressor of cytokine signaling 1	105.859	38.9146	2.72029				KEGG_PATHWAY	gga04810:Regulation of actin cytoskeleton	6	0.537153	0.764335	EGFR, FGFR2, ARPC1A, FGFR3, ITGA11, MYLK	155	177	4324	0.945653	1	0.98417	100
ENSGALG00000046308	AADN04003280.1	AADN04003280.1:1798-3064:-1		2.86683	1.05777	2.71026				UP_SEQ_FEATURE	binding site:ATP	3	0.268577	0.788025	FGFR2, FGFR3, MYLK	77	81	2162	1.03992	1	1	100
ENSGALG00000045201	AADN04004315.1	AADN04004315.1:1808-2332:+1		6.81733	2.52354	2.7015				UP_SEQ_FEATURE	nucleotide phosphate-binding region:ATP	3	0.268577	0.960039	FGFR2, FGFR3, MYLK	77	137	2162	0.614845	1	1	100
FOS	5	5:38264804-38267713:+1	Proto-oncogene c-Fos	9.73267	3.62123	2.68767
NOG	18	18:6262764-6263435:+1	noggin	6.35133	2.36754	2.68267				Annotation Cluster 10	Enrichment Score: 1.5874138560954356
MFSD4	.	.	major facilitator superfamily domain containing 4	2.94367	1.11308	2.64462				Category	Term	Count	%	PValue	Genes	List Total	Pop Hits	Pop Total	Fold Enrichment	Bonferroni	Benjamini	FDR
MFSD4A	26	26:2177659-2191981:+1	major facilitator superfamily domain containing 4A	2.94367	1.11308	2.64462				INTERPRO	IPR013808:Transglutaminase, conserved site	3	0.268577	0.0116885	F13A1, TGM2, TGM4	397	5	11164	16.8725	0.999929	0.43009	16.5446
ENSGALG00000040780	W	W:192483-241426:-1	ubiquitin-associated protein 2	4.02933	1.53638	2.62261				GOTERM_MF_DIRECT	GO:0003810~protein-glutamine gamma-glutamyltransferase activity	3	0.268577	0.0169369	F13A1, TGM2, TGM4	302	6	8532	14.1258	0.998654	0.520266	21.1099
LOC100859807	.	.	class I histocompatibility antigen, F10 alpha chain-like	2.80783	1.07188	2.61953				INTERPRO	IPR008958:Transglutaminase, C-terminal	3	0.268577	0.0171238	F13A1, TGM2, TGM4	397	6	11164	14.0605	0.999999	0.504462	23.3322
ENSGALG00000007646	4	4:11976831-12094695:+1		1.6515	0.634423	2.60315				INTERPRO	IPR023608:Protein-glutamine gamma-glutamyltransferase, eukaryota	3	0.268577	0.0171238	F13A1, TGM2, TGM4	397	6	11164	14.0605	0.999999	0.504462	23.3322
LOC101751647	.	.	GTPase IMAP family member 7-like	30.9698	12.0676	2.56636				INTERPRO	IPR001102:Transglutaminase, N-terminal	3	0.268577	0.0171238	F13A1, TGM2, TGM4	397	6	11164	14.0605	0.999999	0.504462	23.3322
LOC107050585	.	.	serine/arginine repetitive matrix protein 3-like	6.70767	2.62312	2.55714				INTERPRO	IPR002931:Transglutaminase-like	3	0.268577	0.0234159	F13A1, TGM2, TGM4	397	7	11164	12.0518	1	0.600408	30.5442
ENSGALG00000046150	7	7:6929175-6948565:-1		1.0385	0.410192	2.53174				PIR_SUPERFAMILY	PIRSF000459:protein-glutamine gamma-glutamyltransferase/erythrocyte membrane protein band 4.2	3	0.268577	0.0241912	F13A1, TGM2, TGM4	50	6	1143	11.43	0.66779	0.66779	20.5704
ENSGALG00000035675	18	18:4940548-4957050:+1		1.5395	0.609077	2.5276				SMART	SM00460:TGc	3	0.268577	0.0277411	F13A1, TGM2, TGM4	234	7	5997	10.9835	0.995093	0.357955	29.4854
ARC	2	2:148126224-148127576:-1	activity regulated cytoskeleton associated protein	1.42467	0.569115	2.5033				GOTERM_BP_DIRECT	GO:0018149~peptide cross-linking	3	0.268577	0.0732389	F13A1, TGM2, TGM4	341	12	8994	6.59384	1	0.969839	71.5246
C10H15orf39	.	.	chromosome 10 open reading frame, human C15orf39	8.1865	3.27085	2.50287				INTERPRO	IPR014756:Immunoglobulin E-set	6	0.537153	0.116799	CPAMD8, EBF3, F13A1, LY86, TGM2, TGM4	397	73	11164	2.31131	1	0.914807	85.2
LOC422316	.	.	vascular endothelial growth factor receptor kdr-like	2.10067	0.841923	2.49508
ENSGALG00000045113	AADN04001067.1	AADN04001067.1:18651-19834:-1		1.4335	0.580654	2.46877
ENSGALG00000046116	AADN04002340.1	AADN04002340.1:11253-12412:+1		2.09983	0.857808	2.44791
LOC107056599	.	.	kynureninase-like	3.83083	1.56969	2.4405			Up in H	Annotation Cluster 1	Enrichment Score: 2.3190799174659738
ENSGALG00000039641	AADN04010928.1	AADN04010928.1:1196-4222:-1		4.38067	1.79919	2.4348				Category	Term	Count	%	PValue	Genes	List Total	Pop Hits	Pop Total	Fold Enrichment	Bonferroni	Benjamini	FDR
GGT1	.	.	gamma-glutamyltransferase 1	6.86733	2.82108	2.43429				INTERPRO	IPR008983:Tumour necrosis factor-like domain	7	0.957592	7.87543e-05	TNFSF10, TNFSF11, C1QTNF6, TNFSF13B, C1QL1, ENGASE, MMRN2	268	31	11164	9.40636	0.0440496	0.0440496	0.115491
LOC417345	.	.	uncharacterized LOC417345	86.7968	35.6624	2.43385				INTERPRO	IPR001073:Complement C1q protein	4	0.547196	0.0148825	C1QTNF6, C1QL1, ENGASE, MMRN2	268	22	11164	7.57395	0.999812	0.8201	19.7486
ENSGALG00000006511	10	10:12637320-12639335:+1		50.7363	20.8876	2.42902				SMART	SM00110:C1Q	3	0.410397	0.0941479	C1QTNF6, C1QL1, MMRN2	157	20	5997	5.72962	0.999999	0.971551	69.0389
AUTS2	19	19:1327382-1987436:-1	autism susceptibility candidate 2	2.20667	0.910885	2.42255
ENSGALG00000032626	11	11:8516741-8520318:-1		197.968	82.0306	2.41334				Annotation Cluster 2	Enrichment Score: 2.2296934339293095
ENSGALG00000040215	AADN04018610.1	AADN04018610.1:21-2453:-1		1.43233	0.594038	2.41118				Category	Term	Count	%	PValue	Genes	List Total	Pop Hits	Pop Total	Fold Enrichment	Bonferroni	Benjamini	FDR
ENSGALG00000037214	4	4:83355112-83369728:+1		3.49933	1.456	2.40339				GOTERM_BP_DIRECT	GO:0032496~response to lipopolysaccharide	8	1.09439	0.000224707	TNFRSF6B, P2RX7, TNFRSF1B, RELT, PTGER4, TNFRSF18, TBXA2R, BDKRB1	213	53	8994	6.37364	0.21902	0.0790981	0.358737
ARL14	9	9:22196074-22196658:+1	ADP ribosylation factor like GTPase 14	4.01283	1.67627	2.39391				GOTERM_BP_DIRECT	GO:0042981~regulation of apoptotic process	9	1.23119	0.00175041	EGR1, TNFRSF6B, INHBA, TNFRSF1B, NOD1, DUSP1, RELT, TNFRSF18, CIDEA	213	95	8994	4.0003	0.854436	0.274714	2.76275
LOC101749876	.	.	ADP-ribosylation factor-like protein 14-like	4.01283	1.67627	2.39391				GOTERM_BP_DIRECT	GO:0097190~apoptotic signaling pathway	5	0.683995	0.0034404	TNFRSF6B, TNFRSF1B, RELT, TNFRSF18, CD28	213	27	8994	7.81951	0.977426	0.377412	5.36211
ENSGALG00000001709	12	12:849847-853113:-1	Musculoskeletal embryonic nuclear protein 1	9.1675	3.83846	2.38833				GOTERM_MF_DIRECT	GO:0005031~tumor necrosis factor-activated receptor activity	4	0.547196	0.00345596	TNFRSF6B, TNFRSF1B, RELT, TNFRSF18	210	13	8532	12.5011	0.58923	0.58923	4.41644
GVIN1	.	.	GTPase, very large interferon inducible 1	72.2472	30.253	2.3881				INTERPRO	IPR001368:TNFR/NGFR cysteine-rich region	4	0.547196	0.00601355	TNFRSF6B, TNFRSF1B, TNFRSF18, TNFRSF19	268	16	11164	10.4142	0.968259	0.821839	8.46977
ENSGALG00000016556	3	3:105439100-105446401:-1		36.1235	15.1265	2.38809				SMART	SM00208:TNFR	4	0.547196	0.00624211	TNFRSF6B, TNFRSF1B, TNFRSF18, TNFRSF19	157	15	5997	10.186	0.594113	0.594113	7.15572
LOC107056312	.	.	ephrin type-A receptor 5-like	1.212	0.508923	2.3815				GOTERM_BP_DIRECT	GO:0043410~positive regulation of MAPK cascade	5	0.683995	0.00799703	TNFRSF6B, TNFRSF1B, RELT, ADRA1B, TNFRSF18	213	34	8994	6.20961	0.999854	0.55198	12.0498
LOC107055384	.	.	immunoglobulin superfamily member 1-like	1.8805	0.790308	2.37945				GOTERM_BP_DIRECT	GO:0007275~multicellular organism development	9	1.23119	0.0598732	TNFRSF6B, TBX6, SPRY2, TNFRSF1B, RELT, SFRP2, PAX6, TNFRSF18, SIAH2	213	178	8994	2.13499	1	0.919166	62.7429
HAO1	3	3:14662073-14688684:+1	hydroxyacid oxidase (glycolate oxidase) 1	10.7178	4.51577	2.37342				GOTERM_BP_DIRECT	GO:0042127~regulation of cell proliferation	6	0.820793	0.101907	TNFRSF6B, SPRY2, TNFRSF1B, RELT, JUN, TNFRSF18	213	105	8994	2.41288	1	0.959049	82.0718
XKR6	3	3:107399210-107546498:-1	XK related 6	2.47783	1.04488	2.37139
LOC107050476	.	.	uncharacterized LOC107050476	1.118	0.473538	2.36095				Annotation Cluster 3	Enrichment Score: 1.3509212157596 Too low
LOC107049459	.	.	thioredoxin-like protein 1	8.40767	3.56681	2.3572				Category	Term	Count	%	PValue	Genes	List Total	Pop Hits	Pop Total	Fold Enrichment	Bonferroni	Benjamini	FDR
MMRN2	.	.	multimerin 2	2.03183	0.862462	2.35585				UP_KEYWORDS	Disulfide bond	40	5.47196	0.000183681	LOC422316, CSF3, ASPN, BLB1, NOG, ADORA3, C3, NELL1, PAMR1, B2M, P2RY8, ISLR, PRRG4, LCAT, GALNTL6, CCBE1, FGL2, ANGPT1, FGFBP2, HTR1D, CD28, CYR61, FLRT3, CRTAM, BGLAP, EGFL6, MADPRT, LYZ, HGF, ST6GALNAC2, INHBA, SFRP2, EPGN, HTR7, HBEGF, EFNA5, ADAMTS1, LAMC2, LOC107054267, TLR2A	279	896	11626	1.86028	0.030568	0.0154026	0.223635
LOC100859134	.	.	class I histocompatibility antigen, F10 alpha chain-like	9.6835	4.12438	2.34787				UP_SEQ_FEATURE	disulfide bond	17	2.32558	0.00545984	CSF3, BGLAP, NOG, MADPRT, LYZ, ST6GALNAC2, B2M, P2RY8, INHBA, SFRP2, EPGN, LCAT, EFNA5, FGFBP2, TLR2A, CD28, CYR61	54	340	2162	2.00185	0.642729	0.642729	6.56696
LOC101749641	.	.	uncharacterized LOC101749641	40.9048	17.4553	2.3434				UP_SEQ_FEATURE	signal peptide	21	2.87278	0.00758397	CSF3, BGLAP, BLB1, NOG, MADPRT, C3, PMEL, LYZ, HGF, B2M, INHBA, EPHA4, SFRP2, EPGN, HPSE, LCAT, EFNA5, FGFBP2, TLR2A, CYR61, CD28	54	484	2162	1.73714	0.760983	0.511106	9.01286
ENSGALG00000029577	AADN04002707.1	AADN04002707.1:3847-4646:+1		2.0415	0.878423	2.32405				UP_KEYWORDS	Secreted	16	2.18878	0.061273	FLRT3, CSF3, BGLAP, NOG, C3, LYZ, B2M, INHBA, C1QTNF6, SFRP2, HPSE, LCAT, C1QL1, HBEGF, FGFBP2, CYR61	279	404	11626	1.65031	0.999977	0.882014	53.728
ENSGALG00000045364	1	1:140045888-140046687:+1		2.0415	0.878423	2.32405				UP_KEYWORDS	Glycoprotein	18	2.46238	0.0718568	FLRT3, CSF3, ORAI1, NOG, ADORA3, PMEL, ST6GALNAC2, P2RY8, EPHA4, INHBA, GYLTL1B, EPGN, HPSE, LCAT, EFNA5, LOC107054267, TLR2A, CD28	279	483	11626	1.55293	0.999997	0.79305	59.7003
ENSGALG00000045021	2	2:370778-372653:-1		1.905	0.821	2.32034				UP_SEQ_FEATURE	glycosylation site:N-linked (GlcNAc...)	15	2.05198	0.125647	CSF3, ORAI1, NOG, PMEL, ST6GALNAC2, P2RY8, EPHA4, INHBA, GYLTL1B, EPGN, HPSE, LCAT, EFNA5, TLR2A, CD28	54	417	2162	1.44018	1	0.993582	81.0978
CIDEA	2	2:97484738-97493933:-1	cell death-inducing DFFA-like effector a	41.1435	17.7446	2.31865				UP_SEQ_FEATURE	topological domain:Cytoplasmic	9	1.23119	0.450218	P2RY8, ORAI1, EPHA4, GYLTL1B, EPGN, HVCN1, TLR2A, ST6GALNAC2, CD28	54	298	2162	1.20917	1	1	99.9402
ENSGALG00000044888	AADN04011572.1	AADN04011572.1:5423-7416:-1		5.5165	2.38269	2.31524				UP_SEQ_FEATURE	topological domain:Extracellular	7	0.957592	0.528302	P2RY8, ORAI1, EPHA4, EPGN, HVCN1, TLR2A, CD28	54	236	2162	1.18754	1	1	99.9911
HTR1D	23	23:1671071-1672207:+1	5-hydroxytryptamine receptor 1D	1.24683	0.538731	2.31439				UP_SEQ_FEATURE	transmembrane region	10	1.36799	0.694021	P2RY8, ORAI1, EPHA4, GYLTL1B, EPGN, AGPAT9, HVCN1, TLR2A, ST6GALNAC2, CD28	54	408	2162	0.9813	1	1	100
TMEM35A	4	4:2112404-2113039:-1	transmembrane protein 35A	200.33	86.6325	2.31241
TSC22D1	1	1:167406458-167484232:-1	TSC22 domain family, member 1	124.086	53.9023	2.30205
RGS1	8	8:3620501-3624059:-1	regulator of G protein signaling 1	795.977	347.808	2.28855
LOC107056335	.	.	zinc transporter 9-like	4.21233	1.84092	2.28816
LOC100859531	.	.	butyrophilin subfamily 3 member A3-like	1.87917	0.822462	2.28481
ADAMTS5	1	1:103067330-103106355:-1	ADAM metallopeptidase with thrombospondin type 1 motif 5	2.90817	1.27308	2.28436
CX3CL1	11	11:831860-836141:+1		41.3372	18.0962	2.28431
ENSGALG00000042570	1	1:175487151-175493054:-1		7.29067	3.19923	2.27888
MYO9A	10	10:1328919-1463070:-1	myosin IXA	30.6647	13.4848	2.27402			GATHER analysis
HEMGN	.	.	hemogen	1.62367	0.715	2.27086				Annotation	Total Genes With Ann	Your Genes (With Ann)	Your Genes (No Ann)	Genome (With Ann)	Genome (No Ann)	ln(Bayes factor)	neg ln(p value)	FE: neg ln(p value)	FE: neg ln(FDR)	Genes
ENSGALG00000033114	AADN04005449.1	AADN04005449.1:5398-6778:+1		1.25367	0.5525	2.26908			Down in H	GO:0007606 [6]: sensory perception of chemical stimulus	3	1	286	1224	11118	20.55	11.63	0	0	UGT2A1 Ugt2a1:H Ugt2a1:H
LOC101747797	.	.	Ig heavy chain V region C3-like	193.175	85.161	2.26835				GO:0006139 [5]: nucleobase, nucleoside, nucleotide and nucleic acid metabolism	89	31	291	2936	9021	19.83	11.63	0	0	AK5 CEBPD COL24A1 DLX5 DNASE1L3 EBF3 EDA ELF3 ENPP1 ENPP3 GUCY1A2 HEY1 ID1 ID4 IFNK IL31RA MAZ MEF2B NR4A2 PAPSS2 PER3 PHTF1 SALL3 SATB1 SIX2 SOX5 SOX9 STRBP TP73L UGP2 ZNF462 Abcb11:H Ankrd6:H Ant2:H At3g46320:H At4g29680:H At4g29690:H At5g03690:H BNA4:H CG18522:H Cebpd:H Dlx5:H Dlx5:H Dnase1l3:H Dnase1l3:H Elf3:H Enpp1:H Enpp1:H Enpp3:H Enpp3:H Fah:H Fah:H Gycalpha99B:H Helt:H Hey1:H Hey1:H His…
FKBP6	19	19:280136-298423:-1	FK506 binding protein 6	2.42367	1.06865	2.26796				GO:0007608 [7]: perception of smell	3	1	286	1176	11166	19.37	10.94	0	0	UGT2A1 Ugt2a1:H Ugt2a1:H
SAMD9L	.	.	sterile alpha motif domain containing 9-like	44.846	19.7986	2.26511				GO:0006817 [8]: phosphate transport	27	18	304	72	11885	19.29	10.94	24.94	17.71	C1QL2 C1QTNF8 COL10A1 COL11A1 COL15A1 COL21A1 COL22A1 COL24A1 COL25A1 COL4A1 COL4A2 COL8A2 COL9A1 COL9A2 COL9A3 EDA EMID1 EMID2 Col11a1:H Col11a1:H Col4a1:H Col4a2:H Col9a1:H Col9a2:H Eda:H Emid1:H Emid2:H
ENSGALG00000009479	2	2:22939327-22944066:-1		22.4232	9.89946	2.26509				GO:0009653 [3]: morphogenesis	188	69	253	1081	10876	18.87	10.54	24.17	17.63	ANPEP BMP6 BMP8B C20orf10 CD9 CHAD CLEC3A COL10A1 COL11A1 COL9A1 COL9A2 COMP CPM DLX5 DMD ECE2 EDA EGFL7 ELF3 ENC1 ENG EVA1 EXTL1 FEZ1 FGFR3 FGFRL1 FRZB FZD9 GNAO1 GPC4 GREM1 GYPC HCK HEY1 IFNG IGFBP2 IL10 IL31RA IL4 ITGA11 LAMB3 LSAMP MAL MATN1 MDK MEF2B MGP MINPP1 MYL1 NGFR NOV NRCAM PALM PAPSS2 PCP4 PHGDH PTN RET S100B SEMA3A SEMA3B SEMA3D SERPINF1 SGCD SIX2 SOX9 UGT8 UNC5C WISP2 Adam19:H Anpe…
ENSGALG00000045518	AADN04003280.1	AADN04003280.1:8440-10275:+1		1.28767	0.569115	2.26258				GO:0009887 [4]: organogenesis	149	57	265	867	11090	15.59	9.55	20.89	15.1	ANPEP BMP6 BMP8B CD9 CLEC3A COL10A1 COL11A1 COL9A1 COL9A2 COMP DLX5 DMD ECE2 EDA EGFL7 ELF3 ENC1 ENG EXTL1 FEZ1 FGFR3 FRZB FZD9 GNAO1 GREM1 GYPC HCK HEY1 IL10 IL31RA IL4 ITGA11 LAMB3 LSAMP MAL MATN1 MDK MEF2B MGP MINPP1 MYL1 NGFR NRCAM PAPSS2 PCP4 PHGDH PTN RET S100B SEMA3A SEMA3B SEMA3D SERPINF1 SGCD SOX9 UGT8 UNC5C Adam19:H Anpep:H Anpep:H CG17739:H Cd3e:H Cd44:H Cd44:H Cd9:H Chad:H Chl1:H Ckts…
C21H1ORF222	.	.	chromosome 21 open reading frame, human C1orf222	2.1685	0.961346	2.25569				GO:0048513 [3]: organ development	150	57	265	867	11090	15.59	9.55	20.89	15.1	ANPEP BMP6 BMP8B CD9 CLEC3A COL10A1 COL11A1 COL9A1 COL9A2 COMP DLX5 DMD ECE2 EDA EGFL7 ELF3 ENC1 ENG EXTL1 FEZ1 FGFR3 FRZB FZD9 GNAO1 GREM1 GYPC HCK HEY1 IL10 IL31RA IL4 ITGA11 LAMB3 LSAMP MAL MATN1 MDK MEF2B MGP MINPP1 MYL1 NGFR NRCAM PAPSS2 PCP4 PHGDH PTN RET S100B SEMA3A SEMA3B SEMA3D SERPINF1 SGCD SOX9 UGT8 UNC5C Adam19:H Anpep:H Anpep:H CG17739:H Cd3e:H Cd44:H Cd44:H Cd9:H Chad:H Chl1:H Ckts…
ENSGALG00000031574	AADN04006046.1	AADN04006046.1:7243-9931:-1		1.99133	0.887385	2.24405				GO:0007275 [2]: development	249	88	234	1699	10258	15.35	9.55	20.54	15.1	ANPEP BMP6 BMP8A BMP8B C20orf10 CD40 CD9 CHAD CLEC3A COL10A1 COL11A1 COL9A1 COL9A2 COMP CPM DLX5 DMD EBF3 ECE2 EDA EGFL7 ELF3 ENC1 ENG EVA1 EXTL1 FEZ1 FGFR3 FGFRL1 FRZB FST FZD9 GCAT GNAO1 GPC4 GREM1 GYPC HCK HEY1 HUNK ID1 IFNG IGFBP2 IL10 IL31RA IL4 ITGA11 LAMA4 LAMA5 LAMB3 LSAMP MAL MATN1 MDFI MDK MEF2B MGP MINPP1 MMP23B MYL1 NEO1 NGFR NOV NRCAM PALM PAPSS2 PCP4 PHGDH PTN RET S100B SEMA3A SEMA3…
ENSGALG00000043196	AADN04001643.1	AADN04001643.1:18676-20953:-1		2.0035	0.892923	2.24375				GO:0000004 [2]: biological_process unknown	29	4	28	11294	6790	15.31	9.55	0	0	EPB41L4A LTBP1 MSMB NEXN SDC4 TM6SF1 Ankrd29:H Antxr1:H At3g62970:H At4g29170:H At5g27920:H At5g65280:H Baalc:H C1ql2:H C1qtnf4:H Cadps:H Cobll1:H Col25a1:H Itm2c:H Olfm3:H Olfm4:H PF14_0155:H Phospho1:H Ropn1l:H Rsad2:H Sh3yl1:H Stc2:H YEL016C:H YMR085W:H
LOC107049705	.	.	uncharacterized LOC107049705	8.21233	3.67146	2.2368				GO:0015698 [7]: inorganic anion transport	35	20	302	125	11832	14.97	9.55	20.55	15.1	C1QL2 C1QTNF8 COL10A1 COL11A1 COL15A1 COL21A1 COL22A1 COL24A1 COL25A1 COL4A1 COL4A2 COL8A2 COL9A1 COL9A2 COL9A3 EDA EMID1 EMID2 GABRA4 SLC12A2 Col11a1:H Col11a1:H Col4a1:H Col4a2:H Col9a1:H Col9a2:H Eda:H Emid1:H Emid2:H Gabra4:H Gabra4:H Gabrd:H Gabrd:H Prkwnk4:H Slc12a2:H
TAGAP	3	3:52365943-52372134:+1	T-cell activation RhoGTPase activating protein	51.9642	23.2748	2.23263				GO:0009581 [5]: detection of external stimulus	24	5	282	1362	10980	14.6	9.44	0	0	CDH3 CNGA1 COCH COL11A1 DFNA5 DHRS3 EFEMP1 LRAT MGP RBP4 UGT2A1 Atp2b2:H Atp2b2:H CG9265:H Cnga1:H Cnga1:H Dfna5h:H Dfna5h:H Gycalpha99B:H Lrat:H Ugt2a1:H Ugt2a1:H cngl:H rdgA:H
ENSGALG00000042655	AADN04009901.1	AADN04009901.1:774-1478:-1		1.815	0.813154	2.23205				GO:0007600 [5]: sensory perception	24	5	282	1352	10990	14.38	9.33	0	0	CDH3 CNGA1 COCH COL11A1 DFNA5 DHRS3 EFEMP1 LRAT MGP RBP4 UGT2A1 Atp2b2:H Atp2b2:H CG9265:H Cnga1:H Cnga1:H Dfna5h:H Dfna5h:H Gycalpha99B:H Lrat:H Ugt2a1:H Ugt2a1:H cngl:H rdgA:H
TMEM150C	4	4:46703047-46715192:+1	transmembrane protein 150C	21.9785	9.84962	2.23141				GO:0009987 [2]: cellular process	813	25	7	5689	12395	13.02	8.74	16.37	11.21	A4GALT ABCB11 ACSL1 ADAM19 ADAM22 ADAMDEC1 ADAMTS19 AK5 AKR1D1 ALDH1L2 ALDOB ANK3 ANPEP AOX1 APOA1 AQP9 ATP2B2 B3GNT7 BBOX1 BECN1 BLK C1QL2 C1QTNF8 C20orf10 C21orf29 C7 CADPS CAMKK1 CCK CCL20 CCR7 CD3E CD40 CD44 CD79B CD9 CDH3 CDO1 CEBPD CHAD CHL1 CLDN1 CNGA1 COL10A1 COL11A1 COL15A1 COL21A1 COL22A1 COL24A1 COL25A1 COL4A1 COL4A2 COL8A2 COL9A1 COL9A2 COL9A3 COMP CORO2A CPA2 CPLX1 CPM CXCL14 CYBRD1 …
ENSGALG00000043381	2	2:44146929-44151846:+1		1.27167	0.570808	2.22784				GO:0006820 [6]: anion transport	37	20	302	154	11803	11.81	8.27	17.36	12.07	C1QL2 C1QTNF8 COL10A1 COL11A1 COL15A1 COL21A1 COL22A1 COL24A1 COL25A1 COL4A1 COL4A2 COL8A2 COL9A1 COL9A2 COL9A3 EDA EMID1 EMID2 GABRA4 SLC12A2 CG7589:H Col11a1:H Col11a1:H Col4a1:H Col4a2:H Col9a1:H Col9a2:H Eda:H Emid1:H Emid2:H Gabra4:H Gabra4:H Gabrd:H Gabrd:H Oatp33Ea:H Prkwnk4:H Slc12a2:H
ENSGALG00000045471	AADN04001403.1	AADN04001403.1:3591-4774:+1		1.82283	0.818923	2.22589				GO:0001501 [5]: skeletal development	33	16	306	105	11852	10.51	7.81	16.1	11.06	BMP6 BMP8B CLEC3A COL10A1 COL11A1 COL9A2 COMP DLX5 EXTL1 FGFR3 FRZB MATN1 MGP MINPP1 PAPSS2 SOX9 Chad:H Col11a1:H Col11a1:H Col9a2:H Enpp1:H Enpp1:H Fgfr2:H Fgfr2:H Mglap:H Mgp:H Mmp13:H Ptn:H Ptn:H Sox9:H Trp63:H Trp63:H babo:H
ANGPT1	2	2:131784819-131949415:-1	angiopoietin 1	16.1595	7.26738	2.22356				GO:0007155 [4]: cell adhesion	93	31	256	451	11891	10.32	7.64	15.59	10.66	ADAM22 ADAMDEC1 C21orf29 CD44 CD9 CDH3 CHL1 CLDN1 COL11A1 COL15A1 COL21A1 COL24A1 COL8A2 COMP ECM2 ENG EVA1 FEZ1 HAPLN1 ITGA11 JAM2 LAMA4 LAMA5 LAMB3 LSAMP NEO1 NRCAM PARVA PDZK3 RET SELE SPON1 TGM2 THBS2 TNC VCAM1 VTN WISP2 Ama:H C130076O07Rik:H CG8561:H Cd44:H Cd44:H Cd9:H Cd9:H Cdh3:H Cdh3:H Col11a1:H Col11a1:H Col15a1:H Col4a1:H Col4a2:H Col8a2:H Col9a1:H Col9a2:H Col9a3:H Comp:H Eda:H Efemp1…
LOC107049482	.	.	thioredoxin-like protein 1	4.66883	2.1055	2.21745				GO:0007582 [2]: physiological process	758	25	7	6537	11547	10.04	7.56	13.37	8.53	A4GALT ABCB11 ACSL1 ADAM19 ADAM22 ADAMDEC1 ADAMTS19 AK5 AKR1D1 ALDH1L2 ALDOB ANK3 ANPEP AOX1 APOA1 AQP9 ATP2B2 B3GNT7 BBOX1 BECN1 BLK C1QL2 C1QTNF8 C20orf10 C7 CADPS CAMKK1 CCL20 CCR7 CD3E CD40 CD79B CD9 CDH3 CDO1 CEBPD CHAD CHGA CNGA1 COCH COL10A1 COL11A1 COL15A1 COL21A1 COL22A1 COL24A1 COL25A1 COL4A1 COL4A2 COL8A2 COL9A1 COL9A2 COL9A3 CORO2A CPA2 CPLX1 CPM CXCL14 CYBRD1 CYP27A1 DAB2 DFNA5 DGAT2…
LOC100858284	.	.	Golgi phosphoprotein 3-like	4.20883	1.90162	2.21329				GO:0009605 [4]: response to external stimulus	88	20	267	2152	10190	10.03	7.56	0	0	AOX1 AQP9 BECN1 C7 CCL20 CCR7 CD40 CDH3 CNGA1 COCH COL11A1 CXCL14 DFNA5 DHRS3 EFEMP1 ENPP1 EPHX1 IFNK IL10 IL1B IL31RA IL4 LRAT LY86 MAPK11 MDK MGLL MGP MOXD1 NR4A2 PTX3 RBP4 S100A8 S100B SELE SLAMF1 STC2 UGT2A1 Aqp9:H Atp2b2:H Atp2b2:H Becn1:H Becn1:H CG10226:H CG30438:H CG5550:H CG9265:H Ccl20:H Ccl20:H Ccr7:H Cnga1:H Cnga1:H Dfna5h:H Dfna5h:H Dnaja1:H Drd3:H Ephx1:H Ephx1:H Gycalpha99B:H Ifng:…
KCNK13	5	5:43755694-43807523:+1	potassium two pore domain channel subfamily K member 13	1.498	0.677731	2.21032				GO:0007626 [3]: locomotory behavior	21	17	4	386	897	9.86	7.46	12.83	8.08	Gnao:H Gnao1:H Gycalpha99B:H Jph3:H ceh-32:H ceh-43:H col-114:H col-154:H col-155:H dpy-10:H egl-15:H egl-20:H epi-1:H fat-7:H goa-1:H his-67:H lbp-5:H mlc-3:H pat-6:H unc-31:H unc-40:H
ENSGALG00000041988	1	1:109907383-109920133:-1		72.2137	32.7181	2.20715				GO:0043283 [4]: biopolymer metabolism	62	15	307	1596	10361	9.77	7.37	0	0	ADAM19 ADAM22 ADAMDEC1 ADAMTS19 ANPEP CPA2 CPM DNASE1L3 ECE2 FAP MME MMP13 MMP23A MMP23B SATB1 Adam19:H Adam22:H Adamdec1:H Adamts19:H Anpep:H Anpep:H At1g59970:H At1g77000:H At3g46320:H CG10000:H CG14516:H CG30438:H CG3099:H CG4017:H CG4678:H CG5429:H CG8646:H CG9003:H Dnase1l3:H Dnase1l3:H Enc1:H Ephx1:H Ephx1:H Fap:H Fap:H GFA1:H Hexo2:H Hist1h4c:H Mgll:H Mgll:H Mme:H Mme:H Mmp13:H Mmp13:H Mmp…
FANCB	1	1:122344605-122359048:+1	Fanconi anemia complementation group B	1.83483	0.832885	2.20299				GO:0008152 [3]: metabolism	433	21	11	4722	13362	9.36	7.17	12.64	7.97	A4GALT ACSL1 ADAM19 ADAM22 ADAMDEC1 ADAMTS19 AK5 AKR1D1 ALDH1L2 ALDOB ANPEP AOX1 APOA1 AQP9 ATP2B2 B3GNT7 BBOX1 BLK CAMKK1 CD3E CD40 CDO1 CEBPD COL24A1 CORO2A CPA2 CPM CYBRD1 CYP27A1 DGAT2 DHRS3 DLX5 DNAJA1 DNASE1L3 DUSP15 EBF3 ECE2 EDA EGFR ELF3 ENPP1 ENPP3 EPHA1 EPHX1 F13A1 FAH FAP FBXL13 FBXL2 FGFR2 FGFR3 FKBP1A FKBP5 FYB GAL3ST1 GCAT GCHFR GFPT1 GFPT2 GM2A GUCY1A2 GYPC HCK HECW2 HEXA HEY1 HPG…
ENSGALG00000044771	AADN04004495.1	AADN04004495.1:5516-7292:+1		11.1312	5.05827	2.20059				GO:0050896 [3]: response to stimulus	127	31	256	2720	9622	9.06	7.05	0	0	AOX1 AQP9 BECN1 C7 CCL20 CCR7 CD3E CD40 CD79B CDH3 CNGA1 COCH COL11A1 CXCL14 DFNA5 DHRS3 DNAJA1 EDA EFEMP1 ENPP1 EPHX1 FYB GTSE1 HSPB8 IFNG IFNK IL10 IL19 IL1B IL1R2 IL31RA IL4 LRAT LY86 MAPK11 MDK MGLL MGP MOXD1 NR4A2 PTX3 RBP4 S100A8 S100B SELE SLAMF1 STC2 TNFRSF25 TNFRSF9 TNFSF4 UGT2A1 VTN Aqp9:H Atp2b2:H Atp2b2:H Becn1:H Becn1:H CG10226:H CG18522:H CG30438:H CG5550:H CG8561:H CG8863:H CG9265:…
LOC107054332	.	.	poly [ADP-ribose] polymerase 11-like	1.55933	0.709769	2.19696				GO:0050875 [3]: cellular physiological process	672	22	10	5412	12672	8.6	6.71	11.89	7.3	A4GALT ABCB11 ACSL1 ADAM19 ADAM22 ADAMDEC1 ADAMTS19 AK5 AKR1D1 ALDH1L2 ALDOB ANK3 ANPEP AOX1 APOA1 AQP9 ATP2B2 B3GNT7 BBOX1 BECN1 BLK C1QL2 C1QTNF8 C20orf10 C7 CADPS CAMKK1 CD3E CD40 CD9 CDO1 CEBPD CHAD CNGA1 COL10A1 COL11A1 COL15A1 COL21A1 COL22A1 COL24A1 COL25A1 COL4A1 COL4A2 COL8A2 COL9A1 COL9A2 COL9A3 CORO2A CPA2 CPLX1 CPM CYBRD1 CYP27A1 DAB2 DGAT2 DHRS3 DLX5 DNAJA1 DNASE1L3 DUSP15 EBF3 ECE2 …
C1QTNF6	1	1:51475822-51477420:+1	C1q and TNF related 6	3.38567	1.54435	2.1923				GO:0006351 [7]: transcription, DNA-dependent	59	21	301	1848	10109	8.52	6.66	0	0	CEBPD DLX5 EBF3 ELF3 HEY1 ID1 ID4 IL31RA MAZ MEF2B NR4A2 PER3 PHTF1 SALL3 SATB1 SIX2 SOX5 SOX9 STRBP TP73L ZNF462 Abcb11:H Ankrd6:H Cebpd:H Dlx5:H Dlx5:H Elf3:H Fah:H Fah:H Helt:H Hey1:H Hey1:H Id1:H Id1:H Ifng:H Ifng:H Maz:H Mef2b:H Nr4a2:H Nr4a2:H Per3:H Per3:H Phtf1:H Ring:H Sall3:H Satb1:H Sfrp4:H Sfrp4:H Six2:H Six4:H Sox100B:H Sox5:H Sox9:H Strbp:H Trp63:H Trp63:H Trpv4:H Trpv4:H Ugp2:H
PGF	5	5:38158264-38162063:-1	placental growth factor	19.5707	8.92808	2.19204				GO:0007186 [6]: G-protein coupled receptor protein signaling pathway	55	17	270	1870	10472	8.37	6.55	0	0	CCR7 CD3E DGKA DGKI DRD3 ECE2 EDNRA FZD9 GABRA4 GNAO1 GPR132 GPR158 GPR23 HTR1E NPY RAMP3 RGS4 TGM2 VIP At4g28130:H At5g57690:H C130010K08Rik:H CG2061:H Ccr7:H Dgka:H Dgka:H Drd3:H Drd3:H Edn1:H Edn1:H Ednra:H Ednra:H Fzd9:H Fzd9:H G-oalpha47A:H Gabra4:H Gabra4:H Gabrd:H Gabrd:H Gnao:H Gnao1:H Gpr132:H Gpr158:H Gpr23:H Gycalpha99B:H Htr5b:H Htr5b:H Itpr3:H Npy:H Npy:H Ramp3:H Ramp3:H Rgs4:H Tgm2:…
ASMTL	1	1:129164014-129190488:+1	acetylserotonin O-methyltransferase-like	238.779	109.079	2.18904				GO:0007610 [2]: behavior	33	17	4	433	850	8.16	6.45	11.12	6.71	DRD3 NPY S100B Chl1:H Gnao:H Gnao1:H Gycalpha99B:H Jph3:H Npy:H Per3:H Ptn:H Ptn:H S100b:H S100b:H Sema-2a:H Tgm4:H ceh-32:H ceh-43:H col-114:H col-154:H col-155:H dpy-10:H egl-15:H egl-20:H epi-1:H fat-7:H goa-1:H his-67:H lbp-5:H mlc-3:H pat-6:H unc-31:H unc-40:H
RGS3	.	.	regulator of G-protein signaling 3	4.09667	1.87404	2.18601				GO:0044238 [4]: primary metabolism	374	124	198	6162	5795	8.04	6.32	0	0	A4GALT ACSL1 ADAM19 ADAM22 ADAMDEC1 ADAMTS19 AK5 AKR1D1 ALDOB ANPEP APOA1 B3GNT7 BBOX1 BLK CAMKK1 CD3E CD40 CDO1 CEBPD COL24A1 CORO2A CPA2 CPM DGAT2 DHRS3 DLX5 DNAJA1 DNASE1L3 DUSP15 EBF3 ECE2 EDA EGFR ELF3 ENPP1 ENPP3 EPHA1 F13A1 FAH FAP FBXL13 FBXL2 FGFR2 FGFR3 FKBP1A FKBP5 FYB GAL3ST1 GCAT GFPT1 GFPT2 GM2A GUCY1A2 GYPC HCK HECW2 HEXA HEY1 HPGD HSPB8 HUNK ID1 ID4 IFNK IL10 IL31RA IL4 MAPK11 MAT…
TBX3	15	15:12277734-12287707:+1	T-box 3	3.8115	1.74631	2.18261				GO:0019222 [4]: regulation of metabolism	76	25	297	2013	9944	7.88	6.21	0	0	CEBPD DLX5 EBF3 EDA ELF3 HEY1 ID1 ID4 IFNK IL10 IL31RA MAZ MEF2B NR4A2 PER3 PHTF1 S100B SALL3 SATB1 SIX2 SOX5 SOX9 STRBP TP73L ZNF462 Abcb11:H Ankrd6:H Cebpd:H Dlx5:H Dlx5:H Egfr:H Elf3:H Fah:H Fah:H Gchfr:H Helt:H Hey1:H Hey1:H Id1:H Id1:H Ifng:H Ifng:H Il10:H Il10:H Il1b:H Il1b:H Il4:H Il4:H Maz:H Mef2b:H Nr4a2:H Nr4a2:H Per3:H Per3:H Phtf1:H Ptx3:H Ring:H S100b:H Sall3:H Satb1:H Sfrp4:H Sfrp4:…
ENSGALG00000036044	5	5:278455-291212:-1		5.43117	2.49869	2.1736				GO:0006350 [6]: transcription	65	24	298	1945	10012	7.56	6.06	0	0	CEBPD COL24A1 DLX5 EBF3 EDA ELF3 HEY1 ID1 ID4 IFNK IL31RA MAZ MEF2B NR4A2 PER3 PHTF1 SALL3 SATB1 SIX2 SOX5 SOX9 STRBP TP73L ZNF462 Abcb11:H Ankrd6:H Cebpd:H Dlx5:H Dlx5:H Elf3:H Fah:H Fah:H Helt:H Hey1:H Hey1:H Id1:H Id1:H Ifng:H Ifng:H Maz:H Mef2b:H Nr4a2:H Nr4a2:H Per3:H Per3:H Phtf1:H Ring:H Sall3:H Satb1:H Sfrp4:H Sfrp4:H Six2:H Six4:H Sox100B:H Sox5:H Sox9:H Strbp:H Trp63:H Trp63:H Trpv4:H T…
LOC107056571	.	.	arachidonate 5-lipoxygenase-like	24.63	11.339	2.17216				GO:0006355 [7]: regulation of transcription, DNA-dependent	59	21	301	1792	10165	7.51	6.06	0	0	CEBPD DLX5 EBF3 ELF3 HEY1 ID1 ID4 IL31RA MAZ MEF2B NR4A2 PER3 PHTF1 SALL3 SATB1 SIX2 SOX5 SOX9 STRBP TP73L ZNF462 Abcb11:H Ankrd6:H Cebpd:H Dlx5:H Dlx5:H Elf3:H Fah:H Fah:H Helt:H Hey1:H Hey1:H Id1:H Id1:H Ifng:H Ifng:H Maz:H Mef2b:H Nr4a2:H Nr4a2:H Per3:H Per3:H Phtf1:H Ring:H Sall3:H Satb1:H Sfrp4:H Sfrp4:H Six2:H Six4:H Sox100B:H Sox5:H Sox9:H Strbp:H Trp63:H Trp63:H Trpv4:H Trpv4:H Ugp2:H
TNNT3	5	5:14010254-14044529:-1	troponin T type 3 (skeletal, fast)	4.51483	2.07985	2.17075				GO:0050877 [4]: neurophysiological process	59	12	275	1495	10847	7.31	5.92	0	0	CDH3 CNGA1 COCH COL11A1 CPLX1 DFNA5 DHRS3 DRD3 DTNA EFEMP1 GABRA4 GABRD GCHFR GRIN3A HTR1E ICA1 LRAT MAL MGP NPY PRIMA1 RBP4 SLC1A6 UGT2A1 Atp2b2:H Atp2b2:H CG5235:H CG7589:H CG8561:H CG9265:H Caps:H Cldn1:H Cnga1:H Cnga1:H Cplx1:H Dfna5h:H Dfna5h:H Gabra4:H Gabra4:H Gabrd:H Gabrd:H Gal3st1:H Gycalpha99B:H Lrat:H Npy:H Nr4a2:H Nr4a2:H Pkg21D:H Prima1:H Ugt2a1:H Ugt2a1:H Ugt8:H Ugt8:H Vamp2:H Vamp…
ALDH3B1	.	.	aldehyde dehydrogenase 3 family, member B1	4.55217	2.09727	2.17052				GO:0019219 [5]: regulation of nucleobase, nucleoside, nucleotide and nucleic acid metabolism	64	23	299	1880	10077	7.3	5.92	0	0	CEBPD DLX5 EBF3 EDA ELF3 HEY1 ID1 ID4 IFNK IL31RA MAZ MEF2B NR4A2 PER3 PHTF1 SALL3 SATB1 SIX2 SOX5 SOX9 STRBP TP73L ZNF462 Abcb11:H Ankrd6:H Cebpd:H Dlx5:H Dlx5:H Elf3:H Fah:H Fah:H Helt:H Hey1:H Hey1:H Id1:H Id1:H Ifng:H Ifng:H Maz:H Mef2b:H Nr4a2:H Nr4a2:H Per3:H Per3:H Phtf1:H Ring:H Sall3:H Satb1:H Sfrp4:H Sfrp4:H Six2:H Six4:H Sox100B:H Sox5:H Sox9:H Strbp:H Trp63:H Trp63:H Trpv4:H Trpv4:H U…
ENSGALG00000044411	AADN04002981.1	AADN04002981.1:13675-15126:-1		6.00167	2.77385	2.16366				GO:0045449 [6]: regulation of transcription	64	23	299	1854	10103	6.86	5.6	0	0	CEBPD DLX5 EBF3 EDA ELF3 HEY1 ID1 ID4 IFNK IL31RA MAZ MEF2B NR4A2 PER3 PHTF1 SALL3 SATB1 SIX2 SOX5 SOX9 STRBP TP73L ZNF462 Abcb11:H Ankrd6:H Cebpd:H Dlx5:H Dlx5:H Elf3:H Fah:H Fah:H Helt:H Hey1:H Hey1:H Id1:H Id1:H Ifng:H Ifng:H Maz:H Mef2b:H Nr4a2:H Nr4a2:H Per3:H Per3:H Phtf1:H Ring:H Sall3:H Satb1:H Sfrp4:H Sfrp4:H Six2:H Six4:H Sox100B:H Sox5:H Sox9:H Strbp:H Trp63:H Trp63:H Trpv4:H Trpv4:H U…
TNFRSF19	1	1:177513346-177560920:-1	TNF receptor superfamily member 19	1.398	0.647154	2.16023				GO:0044237 [4]: cellular metabolism	397	18	14	4307	13777	6.16	5.24	9.39	5.71	A4GALT ACSL1 ADAM19 ADAM22 ADAMDEC1 ADAMTS19 AK5 AKR1D1 ALDH1L2 ALDOB ANPEP AOX1 APOA1 B3GNT7 BBOX1 BLK CAMKK1 CD3E CD40 CDO1 CEBPD COL24A1 CORO2A CPA2 CPM CYBRD1 CYP27A1 DGAT2 DHRS3 DLX5 DNAJA1 DNASE1L3 DUSP15 EBF3 ECE2 EDA EGFR ELF3 ENPP1 ENPP3 EPHA1 EPHX1 F13A1 FAH FAP FBXL13 FBXL2 FGFR2 FGFR3 FKBP1A FKBP5 FYB GAL3ST1 GCAT GCHFR GFPT1 GFPT2 GM2A GUCY1A2 GYPC HCK HECW2 HEXA HEY1 HPGD HSPB8 HUNK…
RHOB	3	3:102140473-102142807:+1	ras homolog family member B	133.345	61.9397	2.15283				GO:0009117 [6]: nucleotide metabolism	13	3	29	47	18037	5.81	5.01	9.29	5.69	AK5 ENPP1 ENPP3 GUCY1A2 At4g29680:H At4g29690:H At5g03690:H BNA4:H Enpp1:H Enpp1:H Enpp3:H Enpp3:H Gycalpha99B:H
ENSGALG00000002012	6	6:2582108-2586354:-1		1.398	0.650654	2.14861				GO:0045348 [8]: positive regulation of MHC class II biosynthesis	6	3	284	0	12342	5.72	4.99	11.36	6.86	Ifng:H Ifng:H Il10:H Il10:H Il4:H Il4:H
LOC107049124	.	.	class I histocompatibility antigen, F10 alpha chain-like	3.36867	1.568	2.14838				GO:0006664 [7]: glycolipid metabolism	10	6	316	15	11942	5.62	4.93	11.32	6.86	A4GALT GM2A HEXA ST3GAL5 ST3GAL6 UGT8 Gal3st1:H Ugt8:H Ugt8:H st8sia6:H
BGLAP	25	25:594-1789:+1	bone gamma-carboxyglutamate protein	8.63117	4.02246	2.14574				GO:0019932 [6]: second-messenger-mediated signaling	19	2	30	8	18076	5.44	4.79	8.91	5.44	CCR7 DGKA DGKI EDNRA HTR1E NPY At4g28130:H At5g57690:H C130010K08Rik:H Cd3e:H Dgka:H Dgka:H Ednra:H Itpr3:H Minpp1:H Rapgef4:H Tgm2:H ckk-1:H smp-30:H
LOC418700	.	.	lysozyme g-like	161.88	75.6854	2.13886				GO:0048015 [7]: phosphoinositide-mediated signaling	13	2	30	8	18076	5.44	4.79	8.91	5.44	CCR7 DGKA DGKI EDNRA At4g28130:H At5g57690:H C130010K08Rik:H Dgka:H Dgka:H Ednra:H Itpr3:H Minpp1:H Tgm2:H
RGCCL	.	.	regulator of cell cycle-like	1197.44	561.989	2.13071				GO:0007200 [7]: G-protein signaling, coupled to IP3 second messenger (phospholipase C activating)	12	2	30	8	18076	5.44	4.79	8.91	5.44	CCR7 DGKA DGKI EDNRA At4g28130:H At5g57690:H C130010K08Rik:H Dgka:H Dgka:H Ednra:H Itpr3:H Tgm2:H
LOC107055096	.	.	keratin-associated protein 9-1-like	3.51133	1.64838	2.13017				GO:0007205 [8]: protein kinase C activation	7	2	30	8	18076	5.44	4.79	8.91	5.44	DGKA DGKI At4g28130:H At5g57690:H C130010K08Rik:H Dgka:H Dgka:H
ENSGALG00000032897	AADN04001080.1	AADN04001080.1:9545-12154:+1		6.52733	3.07146	2.12516				GO:0007154 [3]: cell communication	319	124	198	3351	8606	5.33	4.72	10.15	6.17	ADAM22 ADAMDEC1 ANK3 BLK C20orf10 C21orf29 CCK CCL20 CCR7 CD3E CD40 CD44 CD79B CD9 CDH3 CHL1 CLDN1 COL11A1 COL15A1 COL21A1 COL24A1 COL8A2 COMP CORO2A CPLX1 CXCL14 CYTL1 DGKA DGKI DIRAS2 DRD3 DTNA ECE2 ECM2 EDA EDN1 EDNRA EGFR ENG ENPP1 EPHA1 EVA1 FEZ1 FGFR3 FKBP1A FRZB FST FYB FZD9 GABRA4 GABRD GCHFR GNAO1 GPR132 GPR158 GPR23 GRIN3A GUCY1A2 HAPLN1 HCK HTR1E HUNK ICA1 IFNG IFNK IL10 IL19 IL1B IL31…
ENSGALG00000038660	AADN04020783.1	AADN04020783.1:1173-2738:+1		1.2365	0.581846	2.12513				GO:0007179 [8]: transforming growth factor beta receptor signaling pathway	16	8	279	45	12297	5.15	4.65	10.66	6.35	LTBP2 TGFBR1 Bmp6:H Bmp6:H Bmp8a:H Bmper:H Eng:H Fst:H Ltbp1:H Ltbp1:H Ltbp2:H Tgfbr1:H Tgfbr1:H Wfikkn2:H babo:H dlp:H
LOC107056182	.	.	glycerophosphocholine phosphodiesterase GPCPD1-like	5.046	2.3775	2.1224				GO:0007267 [4]: cell-cell signaling	64	31	291	507	11450	5.08	4.59	10.33	6.23	CCL20 CPLX1 CXCL14 DRD3 DTNA ECE2 EDN1 FST GABRA4 GABRD GCHFR GRIN3A HTR1E ICA1 IFNG IL10 IL1B MAL MDK MME NEO1 NPY PRIMA1 SEMA3B SLC1A6 STC2 TNFSF4 VIP WISP2 WNT16 WNT4 CG5235:H CG7589:H CG8561:H Caps:H Cktsf1b1:H Cldn1:H Cplx1:H Fgfr2:H Fgfr2:H Gabra4:H Gabra4:H Gabrd:H Gabrd:H Gal3st1:H Grem1:H Npy:H Nr4a2:H Nr4a2:H Panx3:H Pkg21D:H Prima1:H Rapgef4:H Trpv4:H Trpv4:H Ugt8:H Ugt8:H Vamp2:H Vamp…
MPEG1	5	5:16906936-16909098:+1	macrophage expressed 1	162.321	76.5183	2.12133				GO:0016477 [5]: cell migration	34	9	313	51	11906	5.03	4.55	10.64	6.35	EGFL7 FEZ1 GNAO1 IL10 LAMA4 LAMA5 NRCAM SEMA3B UNC5C Chl1:H Egfl7:H Fez1:H Ifng:H Ifng:H Il1b:H Il1b:H Itga11:H Lama4:H Lama5:H Ngfr:H Ngfr:H Nrcam:H Sema-2a:H Sema3a:H Sema3a:H Unc5c:H Unc5c:H Wnt4:H btl:H egl-15:H egl-20:H epi-1:H fra:H prc:H
LOC107056261	.	.	olfactory receptor 14C36-like	3.47533	1.65062	2.10548				GO:0015849 [5]: organic acid transport	29	8	279	46	12296	5.01	4.55	10.52	6.32	AQP9 SLC12A2 SLC1A6 SLC38A3 SLC38A4 SLC7A1 SLC7A5 SLC7A8 Aqp9:H At5g15240:H At5g38820:H CG5535:H CG6070:H JhI-21:H Slc12a2:H Slc13a3:H Slc13a3:H Slc1a6:H Slc1a6:H Slc38a3:H Slc38a3:H Slc38a4:H Slc38a4:H Slc7a1:H Slc7a1:H Slc7a5:H Slc7a5:H Slc7a8:H Slc7a8:H
EBP	11	11:10433513-10434487:-1	CCAAT/enhancer binding protein alpha	79.3995	37.7832	2.10145				GO:0046942 [6]: carboxylic acid transport	29	8	279	46	12296	5.01	4.55	10.52	6.32	AQP9 SLC12A2 SLC1A6 SLC38A3 SLC38A4 SLC7A1 SLC7A5 SLC7A8 Aqp9:H At5g15240:H At5g38820:H CG5535:H CG6070:H JhI-21:H Slc12a2:H Slc13a3:H Slc13a3:H Slc1a6:H Slc1a6:H Slc38a3:H Slc38a3:H Slc38a4:H Slc38a4:H Slc7a1:H Slc7a1:H Slc7a5:H Slc7a5:H Slc7a8:H Slc7a8:H
ENSGALG00000037876	AADN04001937.1	AADN04001937.1:4683-6960:+1		9.29567	4.42735	2.0996				GO:0050794 [3]: regulation of cellular process	90	40	282	752	11205	4.8	4.38	9.94	6.17	ADAM22 ADAMDEC1 BECN1 C20orf10 CD3E CD40 CHAD ECE2 EDN1 EGFL7 FGFRL1 FKBP1A FRZB IFNG IFNK IGFBP2 IL10 IL1B IL31RA IL4 LAMA4 LAMA5 MAL MDFI NOV NRCAM PRODH PTN RAMP3 RGS4 S100B SEPT4 SLAMF1 TGM2 TNFRSF25 TNFRSF9 TNFSF4 VIP WISP2 WNK4 Bmp6:H Bmper:H CG1776:H Cadps:H Cd3e:H Eda:H Edn1:H Egfl7:H Eng:H Enpp3:H Fgfr2:H Fgfr2:H Fgfr3:H Fgfr3:H Fgfrl1:H Fgfrl1:H Fst:H Ifng:H Ifng:H Igfbp2:H Igfbp2:H Il1…
ENSGALG00000007210	4	4:9568114-9569430:+1		679.752	324.534	2.09455				GO:0001502 [7]: cartilage condensation	8	4	318	4	11953	4.7	4.31	10.42	6.27	COL11A1 MATN1 MGP SOX9 Chad:H Col11a1:H Col11a1:H Sox9:H
NCS1	17	17:6328908-6339400:+1	neuronal calcium sensor 1	33.3903	15.9886	2.08839				GO:0051239 [4]: regulation of organismal physiological process	27	11	276	101	12241	4.53	4.17	9.96	6.17	CD3E EDN1 IFNK IL10 IL31RA IL4 MGP S100B Apoa1:H Cd3e:H Edn1:H Edn1:H Enpp1:H Gnao:H Gnao1:H Ifng:H Ifng:H Il10:H Il1b:H Il1b:H Il4:H Il4:H Mglap:H Mgp:H S100b:H Tnfrsf5:H Uaca:H
ENSGALG00000032355	4	4:43231525-43231782:+1		2.567	1.23038	2.08634				GO:0006040 [6]: amino sugar metabolism	2	1	1	2	1478	4.41	4.1	5.51	3.01	ST3GAL6 PF10_0245:H
RASGEF1B	.	.	RasGEF domain family, member 1B	179.392	86.0115	2.08567				GO:0006041 [7]: glucosamine metabolism	1	1	1	2	1478	4.41	4.1	5.51	3.01	PF10_0245:H
ZFYVE28	.	.	zinc finger, FYVE domain containing 28	12.5102	6.00573	2.08304				GO:0019752 [6]: carboxylic acid metabolism	61	13	80	304	6884	4.39	4.08	8.64	5.28	ACSL1 AKR1D1 BBOX1 CDO1 CORO2A DHRS3 FAH GCAT GFPT1 GFPT2 HPGD MAT1A PHGDH PRODH SCD SLC27A6 SLC7A1 SLC7A5 SLC7A8 Acsl1:H Acsl1:H Akr1d1:H Akr1d1:H At1g12050:H At4g01850:H At4g23850:H At4g34200:H Bbox1:H Bbox1:H CG10361:H CG3394:H CG3961:H CG5493:H CG5535:H CG6070:H Cdo1:H Cdo1:H FAT1:H Faa:H Fah:H Fah:H Gfpt1:H Gfpt2:H Hpgd:H Hpgd:H JhI-21:H MET14:H OLE1:H Padi3:H Paps:H Phgdh:H Phgdh:H Prodh:H …
SCNN1B	14	14:7001817-7013562:-1	sodium channel, non voltage gated 1 beta subunit	1.57483	0.758154	2.07719				GO:0006082 [5]: organic acid metabolism	61	13	80	304	6884	4.39	4.08	8.64	5.28	ACSL1 AKR1D1 BBOX1 CDO1 CORO2A DHRS3 FAH GCAT GFPT1 GFPT2 HPGD MAT1A PHGDH PRODH SCD SLC27A6 SLC7A1 SLC7A5 SLC7A8 Acsl1:H Acsl1:H Akr1d1:H Akr1d1:H At1g12050:H At4g01850:H At4g23850:H At4g34200:H Bbox1:H Bbox1:H CG10361:H CG3394:H CG3961:H CG5493:H CG5535:H CG6070:H Cdo1:H Cdo1:H FAT1:H Faa:H Fah:H Fah:H Gfpt1:H Gfpt2:H Hpgd:H Hpgd:H JhI-21:H MET14:H OLE1:H Padi3:H Paps:H Phgdh:H Phgdh:H Prodh:H …
ENSGALG00000034288	10	10:1141736-1142441:+1		1.289	0.620808	2.07633				GO:0006687 [8]: glycosphingolipid metabolism	6	5	317	11	11946	4.39	4.08	10.09	6.17	A4GALT GM2A HEXA ST3GAL5 UGT8 Ugt8:H
ELMO3	11	11:1060300-1068759:+1	engulfment and cell motility 3	14.2365	6.864	2.07408				GO:0045342 [7]: MHC class II biosynthesis	7	3	284	1	12341	4.36	4.08	9.99	6.17	IL10 Ifng:H Ifng:H Il10:H Il10:H Il4:H Il4:H
LOC107057304	.	.	uncharacterized LOC107057304	1.81067	0.873231	2.07353				GO:0045346 [7]: regulation of MHC class II biosynthesis	7	3	284	1	12341	4.36	4.08	9.99	6.17	IL10 Ifng:H Ifng:H Il10:H Il10:H Il4:H Il4:H
LOC107056787	.	.	A disintegrin and metalloproteinase with thrombospondin motifs 17-like	2.00233	0.965962	2.07289				GO:0048291 [9]: isotype switching to IgG isotypes	5	3	284	1	12341	4.36	4.08	9.99	6.17	Ifng:H Ifng:H Il4:H Il4:H Tnfrsf5:H
ENSGALG00000029783	AADN04024629.1	AADN04024629.1:4523-14980:+1		15.2222	7.36038	2.06812				GO:0048302 [9]: regulation of isotype switching to IgG isotypes	5	3	284	1	12341	4.36	4.08	9.99	6.17	Ifng:H Ifng:H Il4:H Il4:H Tnfrsf5:H
ENSGALG00000038113	5	5:54059841-54060023:+1		588.41	284.535	2.06797				GO:0048304 [10]: positive regulation of isotype switching to IgG isotypes	5	3	284	1	12341	4.36	4.08	9.99	6.17	Ifng:H Ifng:H Il4:H Il4:H Tnfrsf5:H
PLIN2	Z	Z:33603989-33617153:-1	perilipin 2	909.114	439.683	2.06766				GO:0006811 [5]: ion transport	79	36	286	668	11289	4.14	3.89	9.3	5.69	ATP2B2 C1QL2 C1QTNF8 CNGA1 COL10A1 COL11A1 COL15A1 COL21A1 COL22A1 COL24A1 COL25A1 COL4A1 COL4A2 COL8A2 COL9A1 COL9A2 COL9A3 EDA EMID1 EMID2 GABRA4 GABRD GIF GRIN3A ITPR3 KCNAB1 NPY SFXN1 SLC12A2 SLC13A3 SLC22A16 SLC38A3 SLC39A14 SLC39A8 TRPV4 WNK4 Ant2:H Atp2b2:H Atp2b2:H CG13610:H CG4357:H CG7589:H Cacna2d2:H Cacna2d2:H Cnga1:H Cnga1:H Col11a1:H Col11a1:H Col4a1:H Col4a2:H Col9a1:H Col9a2:H Eda…
ENSGALG00000039023	W	W:5058576-5156723:-1	Nipped-B homolog-like	2.3525	1.13946	2.06457				GO:0006259 [5]: DNA metabolism	9	2	320	536	11421	4.14	3.89	0	0	DNASE1L3 SATB1 At3g46320:H Dnase1l3:H Dnase1l3:H Hist1h4c:H Ring:H SPAC13A11.03:H Satb1:H
ENSGALG00000029151	10	10:2537062-2540128:-1		10.6952	5.18085	2.06437				GO:0051216 [6]: cartilage development	9	4	318	5	11952	4.13	3.89	9.85	6.11	COL11A1 MATN1 MGP SOX9 Chad:H Col11a1:H Col11a1:H Mmp13:H Sox9:H
LOC107057441	.	.	amyloid-like protein 2	4.439	2.15212	2.06262				GO:0007178 [7]: transmembrane receptor protein serine/threonine kinase signaling pathway	16	8	279	54	12288	4.01	3.84	9.49	5.78	LTBP2 TGFBR1 Bmp6:H Bmp6:H Bmp8a:H Bmper:H Eng:H Fst:H Ltbp1:H Ltbp1:H Ltbp2:H Tgfbr1:H Tgfbr1:H Wfikkn2:H babo:H dlp:H
LOC107055444	.	.	activated RNA polymerase II transcriptional coactivator p15-like	1.0665	0.517192	2.0621				GO:0006928 [4]: cell motility	44	15	307	167	11790	3.88	3.71	9.33	5.69	CD9 EGFL7 FEZ1 GNAO1 IFNG IL10 LAMA4 LAMA5 NEO1 NPY NRCAM PALM SEMA3B SLC22A16 UNC5C CG32528:H Cd9:H Chl1:H Egfl7:H Fez1:H Ifng:H Ifng:H Il1b:H Il1b:H Itga11:H Lama4:H Lama5:H Ngfr:H Ngfr:H Nrcam:H Sema-2a:H Sema3a:H Sema3a:H Strbp:H Strbp:H Unc5c:H Unc5c:H Wnt4:H btl:H egl-15:H egl-20:H epi-1:H fra:H prc:H
RP11-152F13.10	.	.	Uncharacterized protein	1.818	0.882808	2.05934				GO:0045190 [8]: isotype switching	8	3	147	1	4245	3.82	3.68	8.79	5.36	IL10 IL4 Ifng:H Ifng:H Il10:H Il4:H Il4:H Tnfrsf5:H
ALS2CL	2	2:3260213-3285172:-1	ALS2 C-terminal like	118.117	57.4773	2.05503				GO:0045191 [8]: regulation of isotype switching	8	3	147	1	4245	3.82	3.68	8.79	5.36	IL10 IL4 Ifng:H Ifng:H Il10:H Il4:H Il4:H Tnfrsf5:H
LOC107049501	.	.	astrocytic phosphoprotein PEA-15-like	11.7188	5.70408	2.05447				GO:0007411 [6]: axon guidance	14	5	317	14	11943	3.48	3.39	9.18	5.6	FEZ1 GNAO1 NRCAM SEMA3B UNC5C Chl1:H Fez1:H Ngfr:H Ngfr:H Nrcam:H Sema-2a:H Sema3a:H Sema3a:H fra:H
ENSGALG00000039438	AADN04000879.1	AADN04000879.1:34868-43489:+1		1.69483	0.824962	2.05444				GO:0007399 [5]: neurogenesis	62	24	298	379	11578	3.47	3.39	8.75	5.34	CD9 DLX5 ECE2 ENC1 FEZ1 FZD9 GNAO1 GREM1 HEY1 LSAMP MAL MDK NGFR NRCAM PCP4 PHGDH PTN S100B SEMA3A SEMA3B SEMA3D SERPINF1 UGT8 UNC5C Cd9:H Chl1:H Cldn1:H Dab2:H Dlx5:H Dlx5:H Fez1:H Gal3st1:H Grin3a:H LanA:H Ngfr:H Ngfr:H Nr4a2:H Nr4a2:H Nrcam:H Nrg:H Nrn1:H Ret:H Ring:H S100b:H S100b:H Sema-2a:H Sema3a:H Sema3a:H Sema3b:H Sema3d:H Sema6d:H Sop2:H Stmn1:H Stmn1:H Ugt8:H Ugt8:H Unc5c:H babo:H btl:…
IDH3G	AADN04002404.1	AADN04002404.1:1236-8921:-1	isocitrate dehydrogenase 3 (NAD(+)) gamma	2.16933	1.05608	2.05414				GO:0030154 [3]: cell differentiation	48	19	268	311	12031	3.32	3.28	8.54	5.19	CD9 ECE2 EDA EGFL7 IL10 IL31RA IL4 MAL MDFI MDK NRCAM SLC22A16 Bmp6:H Bmp6:H Cd3e:H Cd9:H Cldn1:H Dab2:H Eda:H Enpp3:H Fgfr3:H Fgfr3:H Fps85D:H Fst:H Gal3st1:H Helt:H Hey1:H Hey1:H Il10:H Il4:H Il4:H Mdfi:H Mdk:H Mdk:H Mlph:H Nr4a2:H Nr4a2:H Nrcam:H Olfm3:H SPR3:H Sfxn1:H Sox9:H Strbp:H Strbp:H Trp63:H Trp63:H Ugt8:H Ugt8:H
ENSGALG00000005572	14	14:6193969-6197292:-1		3.39917	1.65588	2.05278				GO:0006810 [4]: transport	194	64	223	1789	10553	3.28	3.28	8.08	4.91	ABCB11 ANK3 APOA1 AQP9 ATP2B2 C1QL2 C1QTNF8 CADPS CNGA1 COL10A1 COL11A1 COL15A1 COL21A1 COL22A1 COL24A1 COL25A1 COL4A1 COL4A2 COL8A2 COL9A1 COL9A2 COL9A3 CPLX1 EDA EDNRA EMID1 EMID2 FABP4 FYB GABRA4 GABRD GIF GRIN3A ICA1 IL10 ITPR3 KCNAB1 KIF11 KIF25 LRP4 LTBP2 MDFI MLPH NPY PCTP RAMP3 RAPGEF4 RBP4 SFXN1 SLC12A2 SLC13A3 SLC1A6 SLC22A16 SLC25A4 SLC38A3 SLC38A4 SLC39A14 SLC39A8 SLC7A1 SLC7A5 SLC7A8…
NOXO1	.	.	NADPH oxidase organizer 1	3.39917	1.65588	2.05278				GO:0051234 [4]: establishment of localization	194	64	223	1792	10550	3.24	3.26	8.04	4.88	ABCB11 ANK3 APOA1 AQP9 ATP2B2 C1QL2 C1QTNF8 CADPS CNGA1 COL10A1 COL11A1 COL15A1 COL21A1 COL22A1 COL24A1 COL25A1 COL4A1 COL4A2 COL8A2 COL9A1 COL9A2 COL9A3 CPLX1 EDA EDNRA EMID1 EMID2 FABP4 FYB GABRA4 GABRD GIF GRIN3A ICA1 IL10 ITPR3 KCNAB1 KIF11 KIF25 LRP4 LTBP2 MDFI MLPH NPY PCTP RAMP3 RAPGEF4 RBP4 SFXN1 SLC12A2 SLC13A3 SLC1A6 SLC22A16 SLC25A4 SLC38A3 SLC38A4 SLC39A14 SLC39A8 SLC7A1 SLC7A5 SLC7A8…
ENSGALG00000032932	AADN04004935.1	AADN04004935.1:8774-9361:+1		1.89567	0.928269	2.04215				GO:0040007 [3]: growth	38	13	309	141	11816	3.04	3.11	8.49	5.16	BMP6 BMP8A BMP8B C20orf10 CHAD FGFR3 FGFRL1 IFNG IGFBP2 LAMA4 LAMA5 NOV WISP2 Bmp6:H Bmp6:H Bmp8a:H Ifng:H Ifng:H Igfbp2:H Igfbp2:H Lama4:H Lama5:H Nov:H Nov:H Wisp2:H Wisp2:H babo:H ceh-32:H ceh-43:H col-114:H col-154:H col-155:H col-157:H dpy-10:H epi-1:H fat-7:H his-67:H rme-2:H
IRF1	13	13:16977371-16983282:-1	interferon regulatory factor 1	464.002	227.357	2.04086				GO:0045727 [7]: positive regulation of protein biosynthesis	8	4	146	7	4239	3.01	3.08	7.94	4.8	Ifng:H Ifng:H Il10:H Il10:H Il1b:H Il1b:H Il4:H Il4:H
ENSGALG00000045304	26	26:2568738-2569802:-1		2.00467	0.986308	2.0325				GO:0051179 [3]: localization	195	64	223	1809	10533	3	3.08	7.79	4.68	ABCB11 ANK3 APOA1 AQP9 ATP2B2 C1QL2 C1QTNF8 CADPS CNGA1 COL10A1 COL11A1 COL15A1 COL21A1 COL22A1 COL24A1 COL25A1 COL4A1 COL4A2 COL8A2 COL9A1 COL9A2 COL9A3 CPLX1 EDA EDNRA EMID1 EMID2 FABP4 FYB GABRA4 GABRD GIF GRIN3A ICA1 IL10 ITPR3 KCNAB1 KIF11 KIF25 LRP4 LTBP2 MAL MDFI MLPH NPY PCTP RAMP3 RAPGEF4 RBP4 SFXN1 SLC12A2 SLC13A3 SLC1A6 SLC22A16 SLC25A4 SLC38A3 SLC38A4 SLC39A14 SLC39A8 SLC7A1 SLC7A5 SL…
MADPRT	1	1:194211172-194212413:+1	erythroblast NAD(P)(+)--arginine ADP-ribosyltransferase precursor	3.27667	1.613	2.03141
TMEM204	14	14:13795143-13822074:-1	transmembrane protein 204	4.043	1.99288	2.02872
LOC107056588	.	.	transmembrane 9 superfamily member 3-like	40.8933	20.1745	2.02698
CYSTM1	13	13:1458573-1480966:+1	cysteine rich transmembrane module containing 1	547.145	269.939	2.02692
ENSGALG00000042339	1	1:174109556-174205670:+1		1.14933	0.567577	2.02498			Up in H	Annotation	Total Genes With Ann	Your Genes (With Ann)	Your Genes (No Ann)	Genome (With Ann)	Genome (No Ann)	ln(Bayes factor)	neg ln(p value)	FE: neg ln(p value)	FE: neg ln(FDR)	Genes
PIM3	1	1:19165830-19169549:-1	Pim-3 proto-oncogene, serine/threonine kinase	137.186	67.8243	2.02266				GO:0050+K236:K268794 [3]: regulation of cellular process	74	33	148	759	11339	12.04	8.38	16.89	9.93	ADAMTS1 APAF1 BGLAP CARD4 CD28 CDKN2A CIDEA CSF3 CX3CL1 CYR61 HBEGF HIPK2 IL8 INHBA LIF NOG PARD6B PGF PPAP2A PRKCQ PTPN6 RGS3 RGS9 SOCS1 SOCS3 SOCS7 SPRY2 TNFAIP3 TNFRSF18 TNFRSF19 TNFRSF6B TNFSF10 TNFSF13B Apaf1:H Apaf1:H Bglap2:H C3:H CG13030:H CG7095:H Card4:H Casp7:H Cd28:H Cd28:H Cdkn2b:H Cyr61:H Cyr61:H Dtr:H FRQ1:H Freq:H Hemgn:H Hgf:H Hif1a:H Hipk2:H Nog:H Pax6:H Pax6:H Ppap2a:H Prkcq:H …
MED12L	9	9:23593758-23694770:-1	mediator complex subunit 12-like	5.34667	2.65035	2.01735				GO:0009653 [3]: morphogenesis	109	37	131	1069	11392	11.27	8.2	15.99	9.81	ANGPT1 ANKRD2 APAF1 BGLAP CYR61 EBP EFNA5 GYLTL1B HBEGF IL8 INHBA ITGA2 LAMC2 NELL1 NOG PARD6B PAX6 PGF PRKCQ RHOB SOCS1 SOCS3 SOCS7 SPRY2 SRD5A2 TBX10 TBX3 TBX6 TNFSF11 TNNT3 Angpt1:H Apaf1:H Apaf1:H Arc:H Arc:H Arhgap15:H Bglap-rs1:H Bglap1:H Bglap2:H Bglap2:H CG13030:H Cd28:H Cyp26b1:H Cyr61:H Cyr61:H Doc2:H Doc3:H Dtr:H Ebp:H Ebp:H Efna5:H Efna5:H Egr1:H Egr1:H Epha4:H Fgd4:H Fgd4:H Fos:H Hem…
ENSGALG00000039952	3	3:104909426-104909674:-1		2.38983	1.18496	2.0168				GO:0009581 [5]: detection of external stimulus	9	1	167	1366	11095	11.25	8.2	0	0	GYLTL1B MYO9A NOG PAX6 RGS9 Frq:H Rgs9:H Rgs9:H Sh:H
ENSGALG00000033485	AADN04010344.1	AADN04010344.1:2640-7120:-1		168.367	83.5297	2.01565				GO:0007600 [5]: sensory perception	9	1	167	1356	11105	11.11	8.14	0	0	GYLTL1B MYO9A NOG PAX6 RGS9 Frq:H Rgs9:H Rgs9:H Sh:H
ENSGALG00000030214	AADN04001960.1	AADN04001960.1:10406-16523:+1		1.69183	0.841885	2.00958				GO:0007275 [2]: development	147	47	121	1591	10870	11.02	8.05	15.67	9.81	ADRA1B ALAD ANGPT1 ANKRD2 APAF1 BGLAP CSF3 CYR61 EBP EFNA5 FOS GYLTL1B HBEGF HSPA2 IL8 INHBA ITGA2 LAMC2 LIF MEOX2 NELL1 NKX2-8 NOG PARD6B PAX6 PGF PIM1 PRKCQ RHOB RYBP SIAH2 SOCS1 SOCS3 SOCS7 SPRY2 SRD5A2 TBX10 TBX3 TBX6 TNFSF11 TNNT3 Alad:H Alad:H Angpt1:H Apaf1:H Apaf1:H Arc:H Arc:H Arhgap15:H At3g22400:H At4g27880:H At4g29010:H Bglap-rs1:H Bglap1:H Bglap2:H Bglap2:H CG13030:H Cd28:H Crem:H Cr…
LOC416633	.	.	class II, major histocompatibility complex, transactivator-like	2.125	1.05808	2.00836				GO:0050877 [4]: neurophysiological process	19	2	166	1505	10956	10.81	7.95	0	0	GYLTL1B HTR1D HTR7 KCNMB1 MYO9A NOG PAX6 RGS9 5-HT1B:H 5-HT7:H Freq:H Freq:H Frq:H Rgs9:H Rgs9:H Sh:H Syt10:H Syt7:H svp:H
LOC101750603	.	.	cytochrome P450 2J2-like	3.127	1.55742	2.0078				GO:0007154 [3]: cell communication	196	82	99	3393	8705	9.61	7.25	14.18	8.8	ADAMTS1 ADORA3 ADRA1B AHR ANGPT1 ARL4A BDKRB1 BGLAP C3 CARD4 CD28 CNTN4 CREM CSF2RB CSF3 CX3CL1 CYR61 CYSLTR2 DUSP8 EFNA5 EPHA4 FLRT3 GPR114 GPR141 GPR157 GPR18 GYLTL1B HAVCR1 HBEGF HIF1A HIPK2 HTR1D HTR7 IL8 INHBA ISLR ITGA2 KCNMB1 LAMC2 LIF MCF2L MYO9A NCF4 NELL1 NOXO1 NR2F2 P2RX7 P2RY12 P2RY8 PCDH9 PCSK1 PDE4B PDE9A PGF PPAP2A PRKCQ PTGER4 PTPN6 RAB4A RALGPS1 RASD1 RASGEF1B RGS1 RGS3 RGS9 RHOB…
ENSGALG00000014184	W	W:3908079-3957937:-1		1.06183	0.529577	2.00506				GO:0007242 [5]: intracellular signaling cascade	89	35	146	956	11142	9.11	7.08	13.88	8.75	ADORA3 ADRA1B ARL4A BDKRB1 CARD4 DUSP8 HIPK2 HTR1D HTR7 IL8 MCF2L MYO9A NCF4 NOXO1 PPAP2A PRKCQ PTGER4 PTPN6 RAB4A RALGPS1 RASD1 RASGEF1B RGS1 RGS3 RGS9 RHOB RHOU SIAH2 SOCS1 SOCS3 SOCS7 STAP2 TNFRSF19 TNFSF10 TNIK 4732465J09Rik:H 5-HT1B:H 5-HT7:H AW049765:H Adra1b:H Arl4:H Arl4:H CG30158:H CG3105:H Card4:H Cyp26b1:H Dusp1:H Fgd4:H Fgd4:H Freq:H Frq:H Hcph:H Hr38:H Htr7:H Lif:H Mcf2l:H Mcf2l:H Nc…
CCLI10	.	.	chemokine	1941.3	968.267	2.00493				GO:0006749 [6]: glutathione metabolism	7	2	7	0	2488	9.07	7.05	11.37	7.05	GGT1 GGTLA1 ECM38:H Ggt1:H Ggtla1:H SPAC56E4.06c:H SPAC664.09:H
PAMR1	5	5:19101383-19157636:-1	peptidase domain containing associated with muscle regeneration 1	2.8125	1.40296	2.00469				GO:0030278 [6]: regulation of ossification	9	5	163	9	12452	9.07	7.05	14.15	8.8	BGLAP Bglap-rs1:H Bglap1:H Bglap2:H Bglap2:H P2rx7:H P2rx7:H Ptger4:H Ptger4:H
ENSGALG00000037738	AADN04002626.1	AADN04002626.1:480-14280:+1		22.4405	11.1974	2.00408				GO:0046850 [5]: regulation of bone remodeling	10	5	163	10	12451	8.67	6.74	13.76	8.75	BGLAP Bglap-rs1:H Bglap1:H Bglap2:H Bglap2:H P2rx7:H P2rx7:H Ptger4:H Ptger4:H Tnfsf11:H
KCNA3	26	26:1481250-1482992:-1	potassium voltage-gated channel subfamily A member 3	92.491	46.2361	2.00041				GO:0008219 [4]: cell death	50	19	149	379	12082	8.61	6.71	13.47	8.59	AHR APAF1 CARD4 CASP7 CD28 CIDEA ELMO3 FOSL2 HIPK2 INHBA LYZ P4HA3 PTPN6 RHOB SIAH2 TNFAIP3 TNFRSF18 TNFRSF19 TNFRSF1B TNFRSF6B TNFSF10 Ahr:H Apaf1:H Apaf1:H Card4:H Casp7:H Casp7:H Cd28:H Cd28:H Cidea:H Elmo3:H Fgl2:H Fgl2:H Hif1a:H Hipk2:H Lyz:H Lyzs:H Lzp-s:H Rhob:H Siah2:H Siah2:H Tbx3:H Tnfaip3:H Tnfrsf19l:H Tnfrsf1b:H Tnfsf10:H Tnfsf10:H Tnfsf13b:H bl:H fray:H
LOC107054267	.	.	dipeptidase 2-like	7.65733	3.83338	1.99754				GO:0016265 [3]: death	51	19	149	386	12075	8.37	6.55	13.21	8.45	AHR APAF1 CARD4 CASP7 CD28 CIDEA ELMO3 FOSL2 HIPK2 INHBA LYZ P4HA3 PTPN6 RHOB SIAH2 TNFAIP3 TNFRSF18 TNFRSF19 TNFRSF1B TNFRSF6B TNFSF10 Ahr:H Apaf1:H Apaf1:H Card4:H Casp7:H Casp7:H Cd28:H Cd28:H Cidea:H Elmo3:H Fgl2:H Fgl2:H Hif1a:H Hipk2:H Lyz:H Lyzs:H Lzp-s:H Rhob:H Siah2:H Siah2:H Tbx3:H Tnfaip3:H Tnfrsf19l:H Tnfrsf1b:H Tnfsf10:H Tnfsf10:H Tnfsf13b:H bl:H fray:H nhx-2:H
ENSGALG00000031501	AADN04001768.1	AADN04001768.1:1422-2534:+1		2.60317	1.30369	1.99676				GO:0051239 [4]: regulation of organismal physiological process	21	10	158	102	12359	7.98	6.27	12.97	8.31	ADORA3 BGLAP CD28 CX3CL1 INHBA Bglap-rs1:H Bglap1:H Bglap2:H Bglap2:H C3:H Cd28:H Cd28:H Dtr:H Hbegf:H P2rx7:H P2rx7:H Prkcq:H Ptger4:H Ptger4:H Tnfsf11:H Tnfsf13b:H
ENSGALG00000014261	4	4:69068033-69072673:-1		22.8257	11.4833	1.98772				GO:0007165 [4]: signal transduction	172	68	113	2758	9340	7.4	5.98	11.95	7.39	ADAMTS1 ADORA3 ADRA1B AHR ANGPT1 ARL4A BDKRB1 C3 CARD4 CD28 CREM CSF2RB CSF3 CX3CL1 CYSLTR2 DUSP8 EPHA4 GPR114 GPR141 GPR157 GPR18 HBEGF HIF1A HIPK2 HTR1D HTR7 IL8 INHBA ITGA2 LIF MCF2L MYO9A NCF4 NOXO1 NR2F2 P2RX7 P2RY12 P2RY8 PDE4B PDE9A PGF PPAP2A PRKCQ PTGER4 PTPN6 RAB4A RALGPS1 RASD1 RASGEF1B RGS1 RGS3 RGS9 RHOB RHOU SAMHD1 SIAH2 SOCS1 SOCS3 SOCS7 SPRY2 STAP2 TBXA2R TNFRSF18 TNFRSF19 TNFRSF1…
ENSGALG00000035929	AADN04000843.1	AADN04000843.1:31762-31992:+1		3.58233	1.80558	1.98404				GO:0009607 [4]: response to biotic stimulus	77	32	149	926	11172	6.84	5.59	11.56	7.17	ADORA3 ALOX5 B2M BDKRB1 C3 CD1A CD28 CSF2RB CSF3 CX3CL1 CYSLTR2 DUSP1 FOS HPSE HSPA2 IL18BP IL8 INHBA IRF1 LIF LYZ NCF4 PIP3-E PTGER4 RGS1 SAMHD1 SEPP1 SERPING1 TAP2 TNFSF10 TNFSF11 TNFSF13B Alox5:H At3g22400:H At5g51060:H B2m:H B2m:H C3:H CG33147:H CG7798:H CG7966:H Card4:H Cd28:H Cd28:H Csf3:H Csf3:H Cx3cl1:H Cx3cl1:H Egr1:H Egr1:H Ggtla1:H Hao1:H Hsp70Ba:H Hsp70Bb:H Hsp70Bc:H Hspa2:H Hspa2:H L…
ENSGALG00000040531	AADN04000843.1	AADN04000843.1:25130-26410:+1		3.58233	1.80558	1.98404				GO:0030500 [7]: regulation of bone mineralization	7	4	164	7	12454	6.49	5.42	11.59	7.17	BGLAP Bglap-rs1:H Bglap1:H Bglap2:H Bglap2:H P2rx7:H P2rx7:H
ENSGALG00000041221	AADN04000843.1	AADN04000843.1:36860-37655:+1		3.58233	1.80558	1.98404				GO:0006915 [6]: apoptosis	40	19	162	421	11677	5.69	4.95	10.54	6.29	AHR APAF1 CARD4 CASP7 CD28 CIDEA ELMO3 HIPK2 INHBA P4HA3 PTPN6 RHOB SIAH2 TNFAIP3 TNFRSF18 TNFRSF19 TNFRSF1B TNFRSF6B TNFSF10 Ahr:H Apaf1:H Apaf1:H Card4:H Casp7:H Casp7:H Cd28:H Cd28:H Cidea:H Elmo3:H Hif1a:H Hipk2:H Rhob:H Siah2:H Siah2:H Tnfaip3:H Tnfsf10:H Tnfsf10:H Tnfsf13b:H bl:H fray:H
TNFRSF18	.	.	tumor necrosis factor receptor superfamily, member 18	11.2582	5.68077	1.9818				GO:0012501 [5]: programmed cell death	41	19	162	423	11675	5.63	4.93	10.48	6.29	AHR APAF1 CARD4 CASP7 CD28 CIDEA ELMO3 HIPK2 INHBA P4HA3 PTPN6 RHOB SIAH2 TNFAIP3 TNFRSF18 TNFRSF19 TNFRSF1B TNFRSF6B TNFSF10 Ahr:H Apaf1:H Apaf1:H Card4:H Casp7:H Casp7:H Cd28:H Cd28:H Cidea:H Elmo3:H Hif1a:H Hipk2:H Rhob:H Siah2:H Siah2:H Tnfaip3:H Tnfrsf19l:H Tnfsf10:H Tnfsf10:H Tnfsf13b:H bl:H fray:H
KAZN	.	.	kazrin, periplakin interacting protein	5.5235	2.78812	1.98109				GO:0051244 [4]: regulation of cellular physiological process	46	22	159	545	11553	5.58	4.89	10.38	6.25	ADAMTS1 APAF1 CARD4 CD28 CDKN2A CIDEA CSF3 HBEGF HIPK2 IL8 INHBA LIF PARD6B PGF PPAP2A PTPN6 TNFAIP3 TNFRSF18 TNFRSF19 TNFRSF6B TNFSF10 TNFSF13B Apaf1:H Apaf1:H C3:H Card4:H Casp7:H Cd28:H Cd28:H Cdkn2b:H Cyr61:H Dtr:H Freq:H Hgf:H Hif1a:H Hipk2:H Pax6:H Pax6:H Ppap2a:H Prkcq:H Rab4a:H Rab4a:H Tnfsf10:H Tnfsf13b:H bl:H fray:H
ENSGALG00000044064	Z	Z:24931072-24960046:-1		1.07233	0.541885	1.9789				GO:0006952 [5]: defense response	70	28	153	810	11288	5.48	4.81	10.2	6.24	ADORA3 ALOX5 B2M BDKRB1 C3 CD1A CD28 CSF2RB CSF3 CX3CL1 CYSLTR2 FOS HPSE IL18BP IL8 INHBA IRF1 LIF LYZ NCF4 PTGER4 RGS1 SAMHD1 SERPING1 TAP2 TNFSF10 TNFSF11 TNFSF13B Alox5:H At3g22400:H At5g51060:H B2m:H B2m:H C3:H CG33147:H CG7798:H CG7966:H Card4:H Cd28:H Cd28:H Csf3:H Csf3:H Cx3cl1:H Cx3cl1:H Egr1:H Egr1:H Ggtla1:H Hsp70Ba:H Hsp70Bb:H Hsp70Bc:H Lif:H Lif:H Lyz:H Lyzs:H Lzp-s:H Prkcq:H Rgs1:H R…
CSRNP1	2	2:5277138-5282741:+1	cysteine and serine rich nuclear protein 1	112.875	57.1051	1.97663				GO:0045124 [6]: regulation of bone resorption	5	3	96	1	4296	5.46	4.81	10.04	6.13	BGLAP Bglap2:H P2rx7:H P2rx7:H Tnfsf11:H
CYP26B1	.	.	cytochrome P450, family 26, subfamily B, polypeptide 1	1.90917	0.966154	1.97605				GO:0006955 [4]: immune response	57	26	155	721	11377	5.46	4.81	10.21	6.24	ADORA3 ALOX5 B2M BDKRB1 C3 CD1A CD28 CSF2RB CSF3 CX3CL1 CYSLTR2 FOS HPSE IL18BP IL8 INHBA IRF1 LIF PTGER4 RGS1 SAMHD1 SERPING1 TAP2 TNFSF10 TNFSF11 TNFSF13B Alox5:H B2m:H B2m:H C3:H CG7798:H Cd28:H Cd28:H Csf3:H Csf3:H Cx3cl1:H Cx3cl1:H Egr1:H Egr1:H Ggtla1:H Lif:H Lif:H Prkcq:H Rgs1:H Rgs1:H Samhd1:H Serping1:H Serping1:H Tap2:H Tap2:H Tnfrsf1b:H Tnfrsf1b:H Tnfsf10:H Tnfsf10:H Tnfsf11:H Tnfsf11:…
CCBE1	.	.	collagen and calcium binding EGF domains 1	1.91167	0.968346	1.97416				GO:0001503 [5]: ossification	11	6	162	41	12420	5.23	4.67	10.27	6.24	BGLAP Bglap-rs1:H Bglap1:H Bglap2:H Bglap2:H Hemgn:H P2rx7:H P2rx7:H Ptger4:H Ptger4:H Tnfsf11:H
ENSGALG00000044303	AADN04013946.1	AADN04013946.1:304-1400:+1		29.1893	14.8026	1.9719				GO:0009887 [4]: organogenesis	85	28	140	922	11539	5.2	4.67	9.85	6.02	ANGPT1 ANKRD2 APAF1 BGLAP EBP EFNA5 GYLTL1B HBEGF IL8 INHBA ITGA2 LAMC2 NELL1 NOG PARD6B PAX6 PGF RHOB SPRY2 SRD5A2 TBX3 TBX6 TNFSF11 TNNT3 Angpt1:H Apaf1:H Apaf1:H Arc:H Arc:H Bglap-rs1:H Bglap1:H Bglap2:H Bglap2:H CG13030:H Cd28:H Cyr61:H Cyr61:H Doc2:H Doc3:H Dtr:H Ebp:H Ebp:H Efna5:H Efna5:H Egr1:H Egr1:H Epha4:H Fos:H Hemgn:H Hif1a:H Hif1a:H Hr38:H Nog:H Nr2f2:H Nr4a3:H Nr4a3:H P2rx7:H P2rx7…
FAM20A	18	18:7945550-7954990:-1	family with sequence similarity 20, member A	4.67833	2.37573	1.96922				GO:0048513 [3]: organ development	85	28	140	928	11533	5.1	4.62	9.73	5.95	ANGPT1 ANKRD2 APAF1 BGLAP EBP EFNA5 GYLTL1B HBEGF IL8 INHBA ITGA2 LAMC2 NELL1 NOG PARD6B PAX6 PGF RHOB SPRY2 SRD5A2 TBX3 TBX6 TNFSF11 TNNT3 Angpt1:H Apaf1:H Apaf1:H Arc:H Arc:H Bglap-rs1:H Bglap1:H Bglap2:H Bglap2:H CG13030:H Cd28:H Cyr61:H Cyr61:H Doc2:H Doc3:H Dtr:H Ebp:H Ebp:H Efna5:H Efna5:H Egr1:H Egr1:H Epha4:H Fos:H Hemgn:H Hif1a:H Hif1a:H Hr38:H Nog:H Nr2f2:H Nr4a3:H Nr4a3:H P2rx7:H P2rx7…
LOC771388	.	.	CMP-N-acetylneuraminate-beta-galactosamide-alpha-2,3-sialyltransferase 4-like	1.02883	0.522615	1.96862				GO:0030282 [6]: bone mineralization	7	4	164	12	12449	4.85	4.45	9.93	6.07	BGLAP Bglap-rs1:H Bglap1:H Bglap2:H Bglap2:H P2rx7:H P2rx7:H
ENSGALG00000017362	13	13:11459253-11468309:+1		72.3345	36.8527	1.9628				GO:0046849 [4]: bone remodeling	12	6	162	46	12415	4.66	4.25	9.69	5.95	BGLAP Bglap-rs1:H Bglap1:H Bglap2:H Bglap2:H Hemgn:H P2rx7:H P2rx7:H Ptger4:H Ptger4:H Tnfsf11:H Tnfsf11:H
ENSGALG00000035279	KQ759558.1	KQ759558.1:16736-17065:-1		1.57483	0.803423	1.96015				GO:0009408 [5]: response to heat	7	4	48	38	7191	4.54	4.17	8.46	4.83	At5g02490:H Hsp70Ba:H Hsp70Bb:H Hsp70Bbb:H Hsp70Bc:H Hspa2:H Hspa2:H
LOC101750812	.	.	cytokine receptor common subunit beta-like	11.8927	6.09712	1.95054				GO:0009266 [6]: response to temperature	7	4	48	41	7188	4.28	4	8.19	4.66	At5g02490:H Hsp70Ba:H Hsp70Bb:H Hsp70Bbb:H Hsp70Bc:H Hspa2:H Hspa2:H
ENSGALG00000040085	AADN04002517.1	AADN04002517.1:1941-5078:-1		2.6215	1.34462	1.94963				GO:0007187 [7]: G-protein signaling, coupled to cyclic nucleotide second messenger	13	2	50	2	7227	4.16	3.93	8.12	4.66	ADORA3 ADRA1B HTR1D HTR7 PTGER4 RGS1 5-HT1B:H 5-HT7:H Htr7:H P2ry12:H P2y12:H Ptger4:H Ptger4:H
NLRC5	11	11:676354-711376:+1	NLR family, CARD domain containing 5	18.2565	9.37346	1.94768				GO:0007188 [8]: G-protein signaling, coupled to cAMP nucleotide second messenger	11	2	50	2	7227	4.16	3.93	8.12	4.66	ADORA3 ADRA1B PTGER4 RGS1 5-HT1B:H 5-HT7:H Htr7:H P2ry12:H P2y12:H Ptger4:H Ptger4:H
LRRTM2	13	13:2640113-2642017:+1	leucine rich repeat transmembrane neuronal 2	1.54633	0.794192	1.94705				GO:0006139 [5]: nucleobase, nucleoside, nucleotide and nucleic acid metabolism	82	24	157	2943	9155	4.02	3.84	0	0	AHR CIDEA CREM EGR1 FOS FOSL2 HIF1A IRF1 JUN KLF15 KYNU MEOX2 MPG NKX2-8 NR2F2 NR4A3 PAX6 RYBP TBX10 TBX3 TBX6 TNFAIP3 UPP1 ZFP161 Ahr:H Ahr:H CG18764:H CG3788:H Cdkn2b:H Cdkn2b:H Crem:H Crem:H Doc2:H Doc3:H Egr1:H Egr1:H Fos:H Fosl2:H Foxk1:H Hif1a:H Hif1a:H Hipk2:H Hnrpk:H Hnrpk:H Hr38:H Jun:H Jun:H Klf15:H Klf15:H Kynu:H Kynu:H Meox2:H Meox2:H Mpg:H Mpg:H Nr2f2:H Nr2f2:H Nr4a3:H Nr4a3:H Pax6:H…
MTHFS	.	.	5,10-methenyltetrahydrofolate synthetase (5-formyltetrahydrofolate cyclo-ligase)	1.76933	0.910154	1.94399				GO:0007582 [2]: physiological process	465	11	3	6551	11551	3.93	3.74	6.48	3.47	ABCG2 ADAMTS1 ADAMTS5 ADORA3 ADRA1B AGPAT1 AHR ALAD ALDH3B1 ALOX5 APAF1 ASMTL B2M BDKRB1 BGLAP C1QL1 C1QTNF6 C3 CA13 CA9 CARD4 CASP7 CCBE1 CD1A CD28 CDKN2A CIDEA CPNE7 CREM CSF2RB CSF3 CX3CL1 CYP26B1 CYP8B1 CYR61 CYSLTR2 DUSP1 DUSP8 EBP EGFL6 EGR1 ELMO3 EPHA4 FKBP6 FOS FOSL2 GGT1 GGTLA1 GYLTL1B HADHA HAL HAO1 HBEGF HEBP1 HGF HIF1A HIPK2 HPSE HS3ST5 HSPA2 HTR1D HTR7 IDH3G IL18BP IL20RA IL8 INHBA I…
EPHA4	9	9:7630571-7841500:-1	EPH receptor A4	2.83467	1.45842	1.94365				GO:0001501 [5]: skeletal development	16	7	161	79	12382	3.87	3.71	8.84	5.14	BGLAP EBP INHBA NOG TBX3 Bglap-rs1:H Bglap1:H Bglap2:H Bglap2:H Hemgn:H Nog:H P2rx7:H P2rx7:H Ptger4:H Ptger4:H Tnfsf11:H
SAMHD1	20	20:632272-658022:-1	SAM and HD domain containing deoxynucleoside triphosphate triphosphohydrolase 1	72.5943	37.3799	1.94207				GO:0030397 [6]: membrane disassembly	1	1	13	1	18101	3.78	3.64	6.47	3.47	At3g22400:H
ENSGALG00000039866	AADN04002433.1	AADN04002433.1:5012-5904:-1		10.9557	5.64546	1.94061				GO:0006631 [6]: fatty acid metabolism	13	2	12	79	18023	3.69	3.55	6.36	3.42	ALOX5 GGTLA1 HADHA HAO1 Alox5:H At3g22400:H At4g29010:H CG4389:H Ggtla1:H Hadha:H Hadha:H PDX3:H SPAC1851.02:H
ENSGALG00000043758	W	W:1442287-1466769:+1		6.89083	3.55135	1.94034				GO:0007210 [7]: serotonin receptor signaling pathway	3	2	50	3	7226	3.66	3.55	7.61	4.28	5-HT1B:H 5-HT7:H Htr7:H
ENSGALG00000035998	AADN04002813.1	AADN04002813.1:1981-16449:-1		23.1603	11.9433	1.93919				GO:0008544 [7]: epidermis development	3	2	50	3	7226	3.66	3.55	7.61	4.28	LAMC2 Hr38:H puc:H
ENSGALG00000032104	KQ759493.1	KQ759493.1:3620-28747:+1		6.90067	3.57088	1.93248				GO:0042102 [8]: positive regulation of T-cell proliferation	5	3	165	6	12455	3.51	3.42	8.61	4.94	CD28 Cd28:H Cd28:H Prkcq:H Tnfsf13b:H
Wpkci-8	AADN04000843.1	AADN04000843.1:16486-47731:-1	Gallus gallus histidine triad nucleotide binding protein W (HINTW), mRNA.	92.1572	47.6934	1.93228				GO:0000902 [4]: cellular morphogenesis	29	9	159	147	12314	3.45	3.39	8.35	4.76	CYR61 PARD6B PRKCQ SOCS1 SOCS3 SOCS7 Arhgap15:H Cyr61:H Cyr61:H Dtr:H Fgd4:H Fgd4:H Hgf:H Hgf:H Pax6:H Pax6:H RHO3:H Rhou:H SPAC23C4.08:H Socs1:H Socs1:H Socs3:H Socs3:H Socs7:H Tap2:H activin-beta:H par-6:H puc:H svp:H
GBP	.	.	guanylate binding protein	250.813	130.033	1.92884				GO:0006751 [7]: glutathione catabolism	2	1	13	0	5908	3.34	3.32	6.05	3.26	ECM38:H SPAC56E4.06c:H
CCDC37	.	.	coiled-coil domain containing 37	1.49333	0.774769	1.92746				GO:0008152 [3]: metabolism	287	9	5	4734	13368	3.28	3.28	5.8	3.14	ADAMTS1 ADAMTS5 AGPAT1 AHR ALAD ALDH3B1 ALOX5 ASMTL CA13 CA9 CASP7 CD28 CIDEA CPNE7 CREM CYP26B1 CYP8B1 DUSP1 DUSP8 EBP EGR1 EPHA4 FKBP6 FOS FOSL2 GGT1 GGTLA1 GYLTL1B HADHA HAL HAO1 HGF HIF1A HIPK2 HPSE HS3ST5 HSPA2 IDH3G INHBA IRF1 JUN KLF15 KYNU LCAT LYZ MCF2L MEOX2 MMP7 MPG MTHFS NANOS1 NCF4 NELL1 NKX2-8 NOX3 NR2F2 NR4A3 PAX6 PCSK1 PFKFB3 PIM1 PIM3 PIP3-E PNPO PPAP2A PPIF PRKCQ PTPN13 PTPN5 PT…
ARID5A	22	22:2802815-2806073:-1	AT-rich interaction domain 5A	30.9988	16.1008	1.92529				GO:0050792 [3]: regulation of viral life cycle	4	3	178	6	12092	3.13	3.18	8.3	4.75	CD28 HS3ST5 IL8 Cd28:H
ENSGALG00000026533	1	1:135901954-135902199:-1		16.9297	8.82381	1.91864				GO:0009845 [4]: seed germination	1	1	13	3	18099	3.09	3.14	5.78	3.14	At4g29010:H
ENSGALG00000003433	11	11:3565749-3573871:+1		6.07883	3.16846	1.91854				GO:0046852 [6]: positive regulation of bone remodeling	3	2	97	0	4297	3.01	3.08	7.6	4.28	P2rx7:H P2rx7:H Tnfsf11:H
SRD5A2	3	3:33821540-33841067:+1	steroid 5 alpha-reductase 2	1.254	0.653769	1.91811
ENSGALG00000040263	W	W:2000281-2003728:+1		29.3723	15.3392	1.91486
CASP7	6	6:27520205-27538328:+1	caspase 7	18.9138	9.87788	1.91477
ENSGALG00000036872	AADN04004668.1	AADN04004668.1:7791-9052:-1		10.8978	5.69604	1.91323
ENSGALG00000041637	AADN04004668.1	AADN04004668.1:1046-4022:-1		3.669	1.91912	1.91182
NOX3	3	3:50785550-50822797:-1	NADPH oxidase 3	1.63867	0.857308	1.91141
LOC100859467	.	.	ras GTPase-activating protein 1-like	2.38267	1.24865	1.90819
ENSGALG00000039296	AADN04003908.1	AADN04003908.1:2274-5563:+1		15.0963	7.91577	1.90712
KLHL18	2	2:3994528-4016158:+1	kelch-like family member 18	133.833	70.2508	1.90507
LIMD2	27	27:2950471-2960895:-1	LIM domain containing 2	2.236	1.17408	1.90447
LOC107049269	.	.	glycine N-acyltransferase-like protein 3	2.30933	1.21308	1.9037
HPSE	4	4:46759039-46763458:-1	heparanase	37.1697	19.5307	1.90314
P2RY12	9	9:23626222-23627536:+1	purinergic receptor P2Y12	33.9987	17.8727	1.90226
ENSGALG00000037690	AADN04001826.1	AADN04001826.1:3077-17579:+1		33.6875	17.713	1.90186
FOSL2	3	3:27455227-27465411:-1	Fos-related antigen 2	47.3858	24.955	1.89885
ENSGALG00000030666	KQ759365.1	KQ759365.1:30346-45877:-1		29.7368	15.6637	1.89846
LOC107055522	.	.	C-type lectin domain family 2 member D-like	3.30683	1.74419	1.89591
ENSGALG00000036168	AADN04017065.1	AADN04017065.1:291-2117:-1		6.186	3.26335	1.8956
LOC107049527	.	.	rho GTPase-activating protein 32-like	3.62667	1.91385	1.89496
KCNMB1	13	13:3783482-3790486:+1	potassium calcium-activated channel subfamily M regulatory beta subunit 1	45.8805	24.236	1.89307
MEOX2	2	2:28094371-28147050:-1	mesenchyme homeobox 2	1.22117	0.645154	1.89283
ENSGALG00000030382	W	W:3152774-3287030:-1		1.84533	0.98	1.88299
LOC107049174	.	.	Golgi phosphoprotein 3-like	1.84533	0.98	1.88299
AGPAT9	.	.	1-acylglycerol-3-phosphate O-acyltransferase 9	3.329	1.769	1.88185
ENSGALG00000030316	19	19:5329605-5330854:-1		1.03083	0.549308	1.8766
LOC770026	.	.	OX-2 membrane glycoprotein-like	42.4833	22.6489	1.87573
ATP5A1W	.	.	ATP synthase subunit alpha	6.71783	3.58619	1.87325
LOC374195	.	.	chromodomain helicase DNA binding protein 1	1.16017	0.620077	1.871
ENSGALG00000040120	AADN04000612.1	AADN04000612.1:25418-27297:+1		1.3405	0.717192	1.86909
FLRT3	3	3:4691489-4693432:-1	fibronectin leucine rich transmembrane protein 3	27.9427	14.9788	1.86548
LMCD1	12	12:19267852-19288256:+1	LIM and cysteine rich domains 1	7.27317	3.89935	1.86523
ENSGALG00000035118	W	W:99100-170596:+1		2.0085	1.07781	1.8635
UBE2R2L	.	.	ubiquitin-conjugating enzyme E2 R2-like	2.0085	1.07781	1.8635
ENSGALG00000027056	1	1:59476229-59483268:-1		1.74167	0.935346	1.86206
LOC100859779	.	.	transitional endoplasmic reticulum ATPase-like	22.9903	12.3561	1.86065
ENSGALG00000045324	AADN04007985.1	AADN04007985.1:7100-8743:-1		1.09917	0.590808	1.86045
CYSLTR2	.	.	cysteinyl leukotriene receptor 2	15.3512	8.25677	1.85922
ENSGALG00000029790	AADN04006105.1	AADN04006105.1:1653-11981:-1		3.214	1.73192	1.85574
TAP2	16	16:78333-81467:-1		103.992	56.044	1.85553
CRTAM	24	24:3121834-3134300:-1	cytotoxic and regulatory T-cell molecule	3.45083	1.86058	1.85471
AGPAT1	.	.	1-acylglycerol-3-phosphate O-acyltransferase 1 (lysophosphatidic acid acyltransferase, alpha)	2.62217	1.41415	1.85423
ENSGALG00000013575	2	2:90026993-90030445:+1		50.954	27.4927	1.85336
LOC770025	.	.	ribosomal protein L17	9.495	5.12973	1.85097
ENSGALG00000045170	2	2:148482043-148486885:-1		63.7522	34.4715	1.84941
LOC101747995	.	.	lymphocyte antigen 6E-like	63.7522	34.4715	1.84941
SLC47A1	.	.	solute carrier family 47, member 1	6.40083	3.46196	1.8489
ENSGALG00000026884	Z	Z:7161479-7165333:-1		76.607	41.4352	1.84884
PINLYP	.	.	phospholipase A2 inhibitor and LY6/PLAUR domain containing	76.607	41.4352	1.84884
LCAT	11	11:1094450-1100820:-1	lecithin-cholesterol acyltransferase	2.45267	1.32723	1.84796
PRRG4	5	5:5600394-5607333:+1	proline rich Gla (G-carboxyglutamic acid) 4 (transmembrane)	7.67717	4.16238	1.84442
TNFRSF6B	20	20:9851270-9855152:-1	TNF receptor superfamily member 6b	102.21	55.4225	1.8442
LOC769000	.	.	mothers against decapentaplegic homolog 2-like	2.96467	1.60804	1.84365
SLC25A37	.	.	solute carrier family 25 (mitochondrial iron transporter), member 37	6.48467	3.53042	1.8368
JUN	8	8:26451075-26452782:-1	Jun proto-oncogene, AP-1 transcription factor subunit	206.197	112.352	1.83528
ENSGALG00000011084	3	3:40119670-40122732:-1		6.1075	3.33669	1.83041
ENSGALG00000009096	4	4:17820524-17851478:-1		4.79567	2.62004	1.83038
NCF4	1	1:51610637-51620775:-1	neutrophil cytosolic factor 4, 40kDa	31.0647	17.0005	1.82728
PDE4B	8	8:28602386-28623532:+1	phosphodiesterase 4B, cAMP-specific	30.6218	16.7592	1.82717
NAV3	1	1:38668218-38924294:+1	neuron navigator 3	9.49967	5.20531	1.825
ENSGALG00000006375	9	9:4743415-4745533:+1		369.135	202.349	1.82425
ENSGALG00000030475	18	18:711448-717547:-1		1.25833	0.691192	1.82053
FGD4	1	1:59021804-59039816:-1	FYVE, RhoGEF and PH domain containing 4	26.036	14.3152	1.81877
NKX2-8	5	5:36718028-36719677:-1	NK2 homeobox 8	1.22233	0.672923	1.81645
GPR141	2	2:46412221-46429402:-1	G protein-coupled receptor 141	5.44033	2.99992	1.81349
TNFSF10	9	9:19373430-19382089:+1	tumor necrosis factor (ligand) superfamily, member 10	7.89567	4.35469	1.81314
RAB4A	3	3:40094828-40112584:+1	RAB4A, member RAS oncogene family	27.773	15.3293	1.81175
MYOM3	23	23:5648230-5671410:-1	myomesin 3	1.94567	1.07654	1.80734
HTR7	4	4:89413990-89421936:-1	5-hydroxytryptamine (serotonin) receptor 7, adenylate cyclase-coupled	3.90383	2.16665	1.80178
LOC418423	.	.	uncharacterized LOC418423	181.682	100.926	1.80015
LOC107049306	.	.	ras GTPase-activating protein 1-like	2.474	1.37477	1.79957
BEND3	3	3:68143484-68151654:+1	BEN domain containing 3	8.39683	4.67062	1.7978
LOC100857706	.	.	uncharacterized LOC100857706	48.8123	27.2396	1.79196
ENSGALG00000040673	AADN04010040.1	AADN04010040.1:909-8043:-1		14.3982	8.03658	1.79158
LOC107056462	.	.	alpha-actinin-1-like	14.3982	8.03658	1.79158
SPRY2	1	1:152670026-152675345:+1	sprouty RTK signaling antagonist 2	2.92483	1.63531	1.78855
FNDC4	.	.	fibronectin type III domain containing 4	4.63383	2.59165	1.78798
ART7B	.	.	GPI-anchored ADP-ribosyltransferase	2.04133	1.14227	1.78709
NR2F2	10	10:15840850-15846453:+1	nuclear receptor subfamily 2 group F member 2	10.6447	5.96908	1.7833
fndc4	3	3:104806419-104811114:+1	fibronectin type III domain containing 4	3.92567	2.20158	1.78312
ENSGALG00000041621	2	2:148464758-148470888:-1		1353.94	759.317	1.7831
LOC107049892	.	.	T-cell-interacting, activating receptor on myeloid cells protein 1-like	1.42967	0.8025	1.78152
LOC101751363	.	.	SEC14-like protein 2-like	8.83017	4.9585	1.78081
P4HA3	.	.	prolyl 4-hydroxylase, alpha polypeptide III	3.111	1.74742	1.78034
LOC101752211	.	.	ras GTPase-activating protein 1-like	2.19117	1.23115	1.77977
HVCN1	15	15:6026586-6036124:-1	hydrogen voltage gated channel 1	16.7423	9.40719	1.77974
ENSGALG00000023709	17	17:6155900-6158531:+1		33.3225	18.7322	1.77889
ENSGALG00000044889	8	8:25861605-25876875:-1		4.48367	2.52085	1.77864
TIPARP	9	9:22949726-22968865:-1	TCDD inducible poly(ADP-ribose) polymerase	24.2538	13.6517	1.77662
ENSGALG00000025738	3	3:39921768-39926303:+1		59.4943	33.5686	1.77232
C3H8ORF80	.	.	chromosome 3 open reading frame, human C8orf80	10.7178	6.05742	1.76937
PAX6	5	5:5201971-5218801:-1	paired box 6	3.25767	1.84215	1.7684
ENSGALG00000034466	AADN04004860.1	AADN04004860.1:2662-4476:+1		1.04733	0.592385	1.768
LOC107057054	.	.	caspase recruitment domain-containing protein 11-like	1.76717	1.001	1.7654
LOC107051546	.	.	F-BAR domain only protein 1-like	5.47717	3.1145	1.7586
ENSGALG00000029246	AADN04003908.1	AADN04003908.1:7857-10299:+1		12.2737	6.98915	1.7561
C3	AADN04001210.1	AADN04001210.1:6888-29576:+1	complement C3	13.2873	7.56646	1.75608
ENSGALG00000041258	23	23:2220571-2223453:-1		1.26383	0.720308	1.75457
CCDC57	.	.	coiled-coil domain containing 57	9.85333	5.62112	1.75291
ENSGALG00000016852	1	1:140144843-140158209:-1		4.6135	2.63231	1.75264
TNFSF13B	.	.	tumor necrosis factor (ligand) superfamily, member 13b	4.6135	2.63231	1.75264
ENSGALG00000039716	23	23:5309931-5318833:-1		40.5392	23.1444	1.75158
FCHO1	.	.	FCH domain only 1	18.9693	10.8346	1.75081
TUSC3	4	4:64033623-64145672:-1	tumor suppressor candidate 3	2.57367	1.47046	1.75024
ENSGALG00000044011	4	4:77588020-77589735:-1		14.456	8.26423	1.74923
ENSGALG00000043890	2	2:45417974-45418868:+1		1.024	0.585423	1.74916
ASPN	12	12:3382143-3397878:+1	asporin	3.66083	2.09338	1.74876
LOC107051328	.	.	SH3 domain-containing protein C23A1.17-like	10.673	6.11046	1.74668
HEBP1	1	1:48267769-48274299:-1	heme binding protein 1	89.8393	51.5524	1.74268
ALOX5	6	6:17636489-17657686:-1	arachidonate 5-lipoxygenase	19.9688	11.4973	1.73682
UVRAG	1	1:194108535-194189490:-1	UV radiation resistance associated	29.4352	16.9702	1.73452
C17H9ORF114	.	.	chromosome 17 open reading frame, human C9orf114	1.12	0.645962	1.73385
GPR114	.	.	G protein-coupled receptor 114	1.33267	0.769577	1.73169
ENSGALG00000031456	5	5:24977292-24994712:+1		2.05367	1.18681	1.73041
HNRPK	.	.	heterogeneous nuclear ribonucleoprotein K	6.62283	3.82827	1.72998
PTPN13	.	.	protein tyrosine phosphatase, non-receptor type 13 (APO-1/CD95 (Fas)-associated phosphatase)	5.0905	2.94304	1.72967
CREM	2	2:13001322-13032921:-1	cAMP responsive element modulator	202.474	117.132	1.7286
LOC425214	.	.	flagellar attachment zone protein 1-like	2.15433	1.24635	1.72852
KIAA0895L	.	.	KIAA0895-like	2.30367	1.33319	1.72793
TXLNG	.	.	taxilin gamma	11.1173	6.45119	1.7233
PCSK1	Z	Z:57130825-57158645:+1	proprotein convertase subtilisin/kexin type 1	3.95467	2.29531	1.72294
GPR18	1	1:144625392-144630634:+1	G protein-coupled receptor 18	4.2455	2.46708	1.72086
NIPAL1	4	4:66993587-66998001:-1	NIPA-like domain containing 1	1	0.581231	1.72049
TM4SF19	.	.	transmembrane 4 L six family member 19	412.53	240.007	1.71883
HBEGF	13	13:1515672-1521782:-1	heparin binding EGF like growth factor	27.7532	16.1683	1.71651
GALNTL6	4	4:43392792-43477598:+1	polypeptide N-acetylgalactosaminyltransferase-like 6	1.12933	0.657962	1.71641
ORAI1	15	15:5620487-5630350:+1	ORAI calcium release-activated calcium modulator 1	28.2375	16.4528	1.71628
ENSGALG00000042783	AADN04009797.1	AADN04009797.1:2016-3453:+1		7.7335	4.50819	1.71543
ENSGALG00000001882	21	21:2554361-2560669:+1		17.6962	10.3159	1.71542
IL20RA	3	3:55035015-55055817:+1	interleukin 20 receptor, alpha	53.7692	31.3721	1.71392
SPINW	W	W:4303239-4411443:-1	spindlin 1	2.59733	1.51773	1.71133
P2RY8	1	1:129127235-129153159:+1	purinergic receptor P2Y8	26.3415	15.3929	1.71127
DRAM2	26	26:1057415-1065658:+1	DNA damage regulated autophagy modulator 2	19.5175	11.4189	1.70922
LIN54	4	4:46614184-46634139:+1	lin-54 DREAM MuvB core complex component	10.2868	6.0255	1.70722
HS3ST5	3	3:64739075-64934511:+1	heparan sulfate-glucosamine 3-sulfotransferase 5	1.96	1.14912	1.70566
ENSGALG00000030730	Z	Z:7277130-7287519:-1		1.11283	0.652462	1.70559
ENSGALG00000039825	AADN04006662.1	AADN04006662.1:7646-8805:-1		5.00917	2.93769	1.70514
ENSGALG00000046426	26	26:1473742-1479846:-1		21.3777	12.54	1.70475
RELT	.	.	RELT tumor necrosis factor receptor	2.789	1.63615	1.70461
STAP2	.	.	signal transducing adaptor family member 2	1.99267	1.16908	1.70448
TMPRSS13	24	24:5391162-5394288:-1	transmembrane protease serine 13	26.0647	15.3122	1.70221
NR4A3	2	2:89674440-89694916:-1	nuclear receptor subfamily 4 group A member 3	2.21783	1.30358	1.70134
LOC430861	.	.	olfactory receptor 14J1-like	5.34867	3.14731	1.69944
MMP7	1	1:182581300-182585639:+1	matrilysin precursor	1711.19	1007.76	1.69801
CA9	Z	Z:9226405-9236499:-1	carbonic anhydrase IX	9.67717	5.70012	1.69771
ENSGALG00000015395	1	1:88706603-88713873:+1		1.17683	0.694115	1.69544
LOC101751844	.	.	GTPase IMAP family member 5-like	9.42933	5.56704	1.69378
C21orf91	1	1:99381867-99398599:-1	chromosome 21 open reading frame 91	47.2855	27.9227	1.69344
PRR5L	5	5:19446690-19474414:+1	proline rich 5 like	15.8633	9.37204	1.69262
ENSGALG00000040175	AADN04006622.1	AADN04006622.1:1791-4184:-1		51.9497	30.7053	1.69188
PTGER4	Z	Z:12839413-12850084:+1	prostaglandin E receptor 4	2.25033	1.33046	1.69139
MCF2L	1	1:137606558-137750320:-1	MCF.2 cell line derived transforming sequence-like	16.554	9.78865	1.69114
COR3b	5	5:1007045-1008001:+1		1.08	0.638692	1.69096
LOC107055361	.	.	early endosome antigen 1-like	118.371	70.0051	1.69089
PRKCQ	1	1:3665779-3701334:-1	protein kinase C theta	2.83517	1.67785	1.68977
CSF2RB	.	.	colony stimulating factor 2 receptor, beta, low-affinity (granulocyte-macrophage)	31.4975	18.6698	1.68708
ENSGALG00000040039	AADN04002160.1	AADN04002160.1:5629-7122:-1		1.90967	1.13469	1.68298
LOC101750112	.	.	polyketide synthase PksM-like	209.114	124.319	1.68208
LOC101751764	.	.	GTPase IMAP family member 8-like	8.56417	5.09296	1.68157
LOC100858529	.	.	myelin-oligodendrocyte glycoprotein-like	1.65183	0.982462	1.68132
ENSGALG00000046547	Z	Z:27322059-27322973:-1		23.3643	13.911	1.67955
ENSGALG00000038189	28	28:3400027-3406095:+1		1.07867	0.642654	1.67846
ENSGALG00000032126	2	2:54464648-54466061:+1		3.25167	1.93735	1.67841
ENSGALG00000040285	AADN04011183.1	AADN04011183.1:2539-6012:+1		2.87817	1.71504	1.67819
ENSGALG00000014585	19	19:4767118-4768209:+1		1961.69	1171.11	1.67506
ENSGALG00000043671	AADN04003124.1	AADN04003124.1:6503-12619:+1		9.60317	5.73515	1.67444
ENSGALG00000046342	AADN04000971.1	AADN04000971.1:12635-13836:+1		82.32	49.198	1.67324
LOC100859515	.	.	maestro heat-like repeat-containing protein family member 7-like	2.23733	1.33754	1.67272
ARHGAP39	.	.	Rho GTPase activating protein 39	2.12417	1.27038	1.67207
TBXA2R	28	28:1032739-1038106:+1	thromboxane A2 receptor	3.082	1.84327	1.67203
ENSGALG00000026970	5	5:1549219-1550524:+1		237.598	142.107	1.67196
LOC770612	.	.	interferon-induced transmembrane protein 1-like	237.598	142.107	1.67196
MINDY3	2	2:20311172-20357975:+1	MINDY lysine 48 deubiquitinase 3	52.5618	31.4393	1.67185
LOC429800	.	.	zinc finger protein 184-like	2.42617	1.45127	1.67176
LRRC58	1	1:79909273-79920291:+1	leucine rich repeat containing 58	7.50033	4.48812	1.67115
ENSGALG00000044911	AADN04003467.1	AADN04003467.1:180-1398:+1		4.931	2.95358	1.6695
ENSGALG00000029569	2	2:458816-461126:-1		17.7878	10.6561	1.66927
LOC429682	.	.	GTPase IMAP family member 7-like	17.7878	10.6561	1.66927
MORN3	15	15:5632072-5639624:-1	MORN repeat containing 3	4.98667	2.99135	1.66703
LOC101748748	.	.	uncharacterized LOC101748748	17.6903	10.616	1.66638
P2RY13	9	9:23629503-23631209:+1	purinergic receptor P2Y13	79.1077	47.5022	1.66535
ENSGALG00000026422	7	7:28369889-28385093:-1		30.7555	18.4733	1.66487
ENSGALG00000045264	10	10:2247064-2254521:-1		1.257	0.755038	1.66482
ENSGALG00000027872	4	4:50231351-50232022:-1		22.3528	13.4266	1.66482
LOC107052152	.	.	microtubule-associated protein 1S-like	1.95917	1.17708	1.66443
ENSGALG00000044408	AADN04001891.1	AADN04001891.1:12427-14408:-1		7.175	4.31177	1.66405
LOC107049733	.	.	natterin-3-like	7.175	4.31177	1.66405
ENSGALG00000046133	12	12:2696196-2701876:+1		2.63183	1.58223	1.66337
PANX1	1	1:185732435-185751184:-1	pannexin 1	12.602	7.58269	1.66194
SOCS3	18	18:9931036-9933083:+1	suppressor of cytokine signaling 3	65.7738	39.6163	1.66027
GPR157	21	21:3250804-3257577:-1	G protein-coupled receptor 157	29.5447	17.8063	1.65923
PIM1	26	26:228879-232398:-1	Pim-1 proto-oncogene, serine/threonine kinase	12.4497	7.50396	1.65908
ENSGALG00000039084	19	19:9048010-9051562:+1		27.576	16.6347	1.65774
ENSGALG00000044182	AADN04014580.1	AADN04014580.1:202-2172:+1		9.42217	5.684	1.65766
ENSGALG00000007713	18	18:10504470-10508384:-1		82.427	49.7579	1.65656
LOC100858168	.	.	natural cytotoxicity triggering receptor 1-like	4.62283	2.79281	1.65526
ENSGALG00000029089	20	20:5259450-5262380:+1		23.2703	14.0613	1.65492
ENSGALG00000011668	4	4:51270481-51273558:+1		398.627	241.152	1.65301
CSF3	27	27:4737417-4739289:+1	Myelomonocytic growth factor	194.792	117.852	1.65285
PTPN5	5	5:12685002-12717134:-1	protein tyrosine phosphatase, non-receptor type 5 (striatum-enriched)	16.7322	10.1342	1.65107
TBX10	5	5:263816-265197:+1	T-box 10	1.59217	0.965308	1.64939
PLPP1	Z	Z:16805050-16861087:-1	phospholipid phosphatase 1	186.177	112.888	1.64922
HAVCR1	.	.	hepatitis A virus cellular receptor 1	3.49317	2.11862	1.6488
ALAD	17	17:1938858-1947767:+1	aminolevulinate dehydratase	18.0747	10.9645	1.64848
INHBA	2	2:50747740-50762675:-1	inhibin beta A subunit	65.0605	39.5369	1.64556
CNTN4	12	12:17898685-18121966:+1	contactin 4	1.3835	0.841231	1.64461
CYTIP	7	7:36407493-36416220:-1	cytohesin 1 interacting protein	1.88633	1.147	1.64458
PLPP5	22	22:2309067-2311222:-1	phospholipid phosphatase 5	5.35167	3.25531	1.64398
PPAPDC1B	.	.	phosphatidic acid phosphatase type 2 domain containing 1B	5.35167	3.25531	1.64398
PNPO	27	27:4199230-4201502:-1	pyridoxamine 5'-phosphate oxidase	7.53	4.58365	1.64279
GYLTL1B	.	.	glycosyltransferase-like 1B	6.7525	4.11046	1.64276
ENSGALG00000001304	21	21:1900179-1905748:+1		536.339	326.493	1.64273
LPAR5	1	1:77027981-77029234:-1	lysophosphatidic acid receptor 5	6.91383	4.20908	1.6426
ENSGALG00000041647	8	8:20225650-20227884:+1		4.19417	2.55619	1.64079
ZBTB14	2	2:100480729-100482764:+1	zinc finger and BTB domain containing 14	13.1637	8.02669	1.63999
VSIG4	.	.	V-set and immunoglobulin domain containing 4	146.439	89.3248	1.6394
TNIP2	4	4:83016901-83024840:+1	TNFAIP3 interacting protein 2	10.9207	6.66231	1.63917
PRIMPOL	4	4:39762374-39778389:-1	primase and polymerase (DNA-directed)	16.1368	9.86862	1.63517
BDKRB1	5	5:46461641-46462717:+1	bradykinin receptor B1	21.6005	13.2144	1.63462
LARGE2	5	5:23901376-23906282:-1	LARGE xylosyl- and glucuronyltransferase 2	1.4255	0.872462	1.63388
LOC107050723	.	.	uncharacterized LOC107050723	8.50333	5.20912	1.63239
SYT8	5	5:14108059-14112076:-1	synaptotagmin 8	4.62733	2.83631	1.63146
ENSGALG00000031817	18	18:2514324-2514707:+1		1.5245	0.935885	1.62894
SERPING1	5	5:16999644-17004311:-1	serpin peptidase inhibitor, clade G (C1 inhibitor), member 1	72.4117	44.4876	1.62768
LOC107055823	.	.	cilia- and flagella-associated protein 54-like	4.622	2.84292	1.62579
ENSGALG00000035433	AADN04010835.1	AADN04010835.1:3206-5473:+1		10.759	6.62188	1.62476
S100A14	25	25:1861257-1862855:+1	S100 calcium binding protein A14	2.75467	1.69942	1.62094
TMEM116	15	15:6303077-6315839:-1	transmembrane protein 116	11.3375	7.00077	1.61946
LOC107051220	.	.	peroxisomal membrane protein 11B-like	5.45167	3.36712	1.61909
HIPK2	1	1:56075644-56198466:+1	homeodomain interacting protein kinase 2	46.3365	28.6499	1.61733
SSH2	19	19:6084890-6123770:-1	slingshot protein phosphatase 2	2.02033	1.25046	1.61567
ENSGALG00000037828	19	19:6860109-6868039:-1		2.448	1.51538	1.61543
LOC100857637	.	.	transducin-like enhancer protein 1-like	2.091	1.29585	1.61362
ENSGALG00000037468	AADN04004861.1	AADN04004861.1:8479-13962:-1		2.098	1.30023	1.61356
EPGN	4	4:45019071-45027787:+1	epithelial mitogen	1.37967	0.855115	1.61343
CYR61	8	8:16258746-16261197:-1	Protein CYR61	72.2555	44.7908	1.61318
RGS9	18	18:7794578-7821660:-1	regulator of G-protein signaling 9	11.6295	7.21554	1.61173
ENSGALG00000022875	2	2:98303218-98307540:-1		2.34517	1.45523	1.61154
TRIB1	2	2:138969888-138972814:+1	tribbles pseudokinase 1	30.911	19.1922	1.6106
CYP8B1	2	2:2104464-2106136:+1	cytochrome P450 family 8 subfamily B member 1	2.525	1.56831	1.61002
ABCG2	6	6:17548027-17561317:+1	ATP binding cassette subfamily G member 2 (Junior blood group)	3.60417	2.23892	1.60978
EGR1	13	13:18348955-18351756:+1	early growth response 1	77.8553	48.3703	1.60957
LOC101748117	.	.	Ig heavy chain V region C3-like	12.4148	7.714	1.60939
PPIF	6	6:12246857-12254777:-1	peptidylprolyl isomerase F	48.3993	30.0742	1.60933
LOC107052478	.	.	zinc finger protein OZF-like	1.41733	0.880923	1.60892
C4H4ORF45	.	.	chromosome 4 open reading frame, human C4orf45	1.36567	0.848885	1.60878
SMG8	.	.	SMG8 nonsense mediated mRNA decay factor	1.2315	0.765538	1.60867
ENSGALG00000023818	27	27:5258118-5258992:+1		93.568	58.3267	1.60421
CPNE7	11	11:18986242-18989246:+1	copine 7	6.05417	3.77419	1.6041
ENSGALG00000035957	AADN04019139.1	AADN04019139.1:21-2171:-1		11.9415	7.45069	1.60274
ENSGALG00000008653	5	5:24995617-25023029:+1		2.98867	1.86508	1.60244
ENSGALG00000046005	12	12:1326694-1327066:-1		18.3787	11.4762	1.60146
ENSGALG00000032803	AADN04000612.1	AADN04000612.1:83173-84675:-1		12.5945	7.86877	1.60057
LOC776507	.	.	proto-oncogene Mas-like	12.5945	7.86877	1.60057
SLC9A5	.	.	solute carrier family 9, subfamily A (NHE5, cation proton antiporter 5), member 5	20.0468	12.5379	1.5989
LOC107057035	.	.	putative E3 ubiquitin-protein ligase UNKL	2.67567	1.67381	1.59855
ASL2	19	19:4919234-4928185:-1	argininosuccinate lyase	184.939	115.696	1.5985
PDE9A	.	.	phosphodiesterase 9A	2.14633	1.34273	1.59848
ENSGALG00000033591	13	13:3466335-3475168:-1		6.40233	4.00588	1.59823
LOC769726	.	.	kazal-type serine protease inhibitor domain-containing protein 1-like	6.40233	4.00588	1.59823
LOC107053657	.	.	serine/threonine-protein phosphatase 2B catalytic subunit beta isoform-like	1.74033	1.08919	1.59782
LOC107056108	.	.	rho-related GTP-binding protein RhoU-like	1.2695	0.794538	1.59778
LOC101748744	.	.	serine protease 23-like	13.888	8.699	1.59651
STK39	7	7:19192558-19263800:+1	serine/threonine kinase 39	3.81117	2.38985	1.59473
IPCEF1	3	3:50228502-50262908:-1	interaction protein for cytohesin exchange factors 1	9.831	6.16781	1.59392
TLR2A	4	4:20184996-20199647:+1	toll-like receptor 2 type-1 precursor	48.0407	30.1438	1.59372
RHOU	.	.	ras homolog family member U	1.50683	0.945577	1.59356
TNIK	9	9:19651404-19784548:+1	TRAF2 and NCK interacting kinase	41.9997	26.3603	1.59329
SIAH2	9	9:23714328-23719075:+1	siah E3 ubiquitin protein ligase 2	28.6818	18.0127	1.59231
ENSGALG00000036431	28	28:4132312-4132551:+1		30.004	18.8661	1.59037
ENGASE	18	18:9838507-9843851:-1	endo-beta-N-acetylglucosaminidase	1.10683	0.696269	1.58966
LOC107049695	.	.	platelet glycoprotein VI-like	4.4665	2.81038	1.58928
TBX6	15	15:8285250-8296169:+1	T-box 6	4.568	2.87438	1.58921
ABCB1LB	.	.	ATP-binding cassette, sub-family B (MDR/TAP), member 1-like B	4.191	2.63827	1.58854
ENSGALG00000036127	AADN04007026.1	AADN04007026.1:2910-5379:+1		5.95683	3.75031	1.58836
ENSGALG00000011544	1	1:71724526-71731735:+1		8.69767	5.47719	1.58798
ARHGAP15	7	7:32874820-33193628:+1	Rho GTPase activating protein 15	17.5427	11.0673	1.58509
TNFRSF1B	.	.	tumor necrosis factor receptor superfamily, member 1B	5.99483	3.78219	1.58502
ENSGALG00000043130	AADN04001700.1	AADN04001700.1:2912-11589:+1		6.1505	3.88692	1.58236
ENSGALG00000038550	AADN04002066.1	AADN04002066.1:5014-13697:+1		3.07517	1.94342	1.58235
NANOS1	6	6:29993320-29994084:+1	nanos C2HC-type zinc finger 1	5.25883	3.32465	1.58177
ADORA3	26	26:3223603-3225944:-1	adenosine A3 receptor	1.5075	0.953308	1.58134
SIAT9	4	4:85969310-85990133:-1	ST3 beta-galactoside alpha-2,3-sialyltransferase 5	2.07433	1.31238	1.58058
LOC107057070	.	.	mediator of RNA polymerase II transcription subunit 15-like	3.89283	2.46296	1.58055
ENSGALG00000046294	AADN04000861.1	AADN04000861.1:37454-38560:+1		2.95733	1.87369	1.57835
ENSGALG00000022137	25	25:2502854-2503992:+1		1.43983	0.912538	1.57783
ARL4A	2	2:26855855-26856457:+1	ADP ribosylation factor like GTPase 4A	15.4363	9.78504	1.57754
ISLR	.	.	immunoglobulin superfamily containing leucine-rich repeat	6.80483	4.31385	1.57744
ENSGALG00000021525	10	10:2531907-2533175:-1		1.70117	1.07846	1.5774
DENND4C	Z	Z:33679446-33728466:+1	DENN/MADD domain containing 4C	23.4035	14.842	1.57684
CCLI7	.	.	chemokine	57.3593	36.3766	1.57682
CCLi7	19	19:4772390-4773608:-1		57.3593	36.3766	1.57682
ENSGALG00000000866	25	25:2758036-2768002:-1		5.29933	3.36204	1.57623
ENSGALG00000042833	26	26:139302-149917:+1		2.25783	1.43315	1.57543
SEPP1	KQ759505.1	KQ759505.1:346088-354298:+1	Gallus gallus selenoprotein P, plasma, 1 (SEPP1), mRNA.	1259.64	800.061	1.57443
LOC427010	.	.	zinc finger RNA-binding protein-like	1.55483	0.988038	1.57366
FBLIM1	21	21:4225296-4228219:+1	filamin binding LIM protein 1	1.6505	1.04985	1.57214
LAMC2	.	.	laminin, gamma 2	1.45517	0.925962	1.57152
LIF	15	15:10920686-10925689:+1	leukemia inhibitory factor	5.90683	3.7675	1.56784
LOC107055843	.	.	E3 ubiquitin-protein ligase TTC3-like	16.131	10.2946	1.56694
TNFAIP3	3	3:54742403-54761225:-1	TNF alpha induced protein 3	80.5832	51.4545	1.5661
SLCO4A1	20	20:8371293-8396614:+1	solute carrier organic anion transporter family member 4A1	1.02033	0.651538	1.56604
PHYHD1	17	17:5857678-5863488:+1	phytanoyl-CoA dioxygenase domain containing 1	1.427	0.911308	1.56588
NOD1	2	2:41382382-41402668:+1	nucleotide binding oligomerization domain containing 1	66.0073	42.1562	1.56578
IL18BP	.	.	interleukin 18 binding protein	1325.88	847.353	1.56473
FOXK1	14	14:3958384-4000740:+1	forkhead box K1	13.9017	8.88535	1.56456
SELENBP1	.	.	selenium binding protein 1	7.28133	4.65823	1.56311
ENSGALG00000025881	1	1:51576859-51607306:-1		2.02867	1.29865	1.56213
ENSGALG00000034278	15	15:6678850-6689710:-1		4.829	3.09242	1.56156
TNFSF11	1	1:166506011-166525895:+1	tumor necrosis factor (ligand) superfamily, member 11	9.75817	6.25065	1.56114
LOC101749344	.	.	uncharacterized LOC101749344	1.177	0.754038	1.56093
ESCO1	2	2:102709457-102733541:-1	establishment of sister chromatid cohesion N-acetyltransferase 1	17.9878	11.5306	1.56001
TMEM26	6	6:8546459-8560943:+1	transmembrane protein 26	5.42767	3.47927	1.56
LXR	5	5:23115970-23143954:-1	nuclear receptor subfamily 1 group H member 3	71.9005	46.1095	1.55934
DUSP8	5	5:14163587-14184836:+1	dual specificity phosphatase 8	28.8402	18.5018	1.55878
ENSGALG00000039548	AADN04001768.1	AADN04001768.1:6847-8794:-1		1.90517	1.22231	1.55866
LOC101749756	.	.	P2Y purinoceptor 13-like	17.2745	11.093	1.55724
ENSGALG00000015056	2	2:103493136-103529171:+1		13.8937	8.93435	1.55508
ENSGALG00000006797	2	2:10521952-10608270:-1		2.8225	1.81612	1.55414
APAF1	1	1:46718811-46744193:+1	apoptotic peptidase activating factor 1	16.1902	10.4225	1.55339
PPAP2A	.	.	phosphatidic acid phosphatase type 2A	108.213	69.7097	1.55234
CD1.2	16	16:18036-20776:+1		39.5157	25.4583	1.55217
ENSGALG00000044373	AADN04000790.1	AADN04000790.1:44438-45322:+1		2.10967	1.35931	1.55202
LOC107055705	.	.	transmembrane 7 superfamily member 3-like	1.85883	1.19808	1.55151
ADRA1B	13	13:7992487-8008603:-1	adrenoceptor alpha 1B	9.63083	6.20815	1.55132
RUFY4	.	.	RUN and FYVE domain containing 4	1.97767	1.27496	1.55116
SBNO2	28	28:2964719-3005729:-1	strawberry notch homolog 2 (Drosophila)	31.5168	20.3197	1.55105
LOC107049468	.	.	protein phosphatase 1 regulatory subunit 15A-like	133.038	85.7793	1.55094
B2M	10	10:1254940-1257208:+1	beta-2-microglobulin	4696.03	3029.5	1.5501
ENSGALG00000030437	AADN04023835.1	AADN04023835.1:24-1038:+1		1.26233	0.814692	1.54946
RCAN2	3	3:110186436-110216740:-1	regulator of calcineurin 2	1.63983	1.05873	1.54887
ENSGALG00000016142	1	1:108921073-108942022:+1		17.1717	11.0898	1.54842
EFNA5	Z	Z:48046148-48249653:+1	ephrin-A5 precursor	21.4305	13.846	1.54778
LYZ	1	1:35425914-35429601:+1	Lysozyme C	504.097	325.997	1.54632
CA13	.	.	carbonic anhydrase XIII	1.06617	0.689808	1.5456
ENSGALG00000023506	3	3:16420760-16425137:-1		3.3795	2.18673	1.54546
SFRP2	4	4:20227180-20230889:-1	secreted frizzled related protein 2	15.2617	9.87685	1.5452
ENSGALG00000006318	14	14:7350388-7363147:+1		3.163	2.04808	1.54438
LRRC41	8	8:21660231-21668746:-1	leucine rich repeat containing 41	7.52083	4.87027	1.54423
ANKRD2	6	6:22313737-22316507:-1	ankyrin repeat domain 2 (stretch responsive muscle)	2.65667	1.72058	1.54406
LOC101750513	.	.	mitogen-activated protein kinase kinase kinase 12-like	1.65133	1.06962	1.54386
UCKL1	20	20:9691363-9704074:+1	uridine-cytidine kinase 1-like 1	30.2875	19.6259	1.54324
PARD6B	20	20:13684034-13696732:-1	par-6 family cell polarity regulator beta	3.60783	2.33804	1.5431
ENSGALG00000029718	7	7:22717944-22722468:-1		1.00767	0.653038	1.54304
SYDE2	8	8:16377601-16398255:+1	synapse defective Rho GTPase homolog 2	31.9657	20.7443	1.54094
ENSGALG00000045621	11	11:20072043-20072932:-1		2.35217	1.52646	1.54093
YDJC	15	15:362087-375053:-1	YdjC chitooligosaccharide deacetylase homolog	11.4628	7.44204	1.54028
ENSGALG00000039509	2	2:141875709-142000765:+1		4.27317	2.77473	1.54003
ENSGALG00000045408	AADN04001868.1	AADN04001868.1:14451-15407:+1		1.6825	1.09254	1.53999
ENSGALG00000035310	AADN04013335.1	AADN04013335.1:84-6730:+1		2.067	1.34312	1.53896
MYL12A	.	.	myosin, light chain 12A, regulatory, non-sarcomeric	203.451	132.262	1.53824
ACKR2	2	2:2096559-2103345:+1	atypical chemokine receptor 2	5.73467	3.72992	1.53748
WDFY2	.	.	WD repeat and FYVE domain containing 2	1.5065	0.979962	1.53731
C10orf54	.	.	chromosome 6 open reading frame, human C10orf54	20.8737	13.5787	1.53724
ENSGALG00000017019	1	1:170157889-170223517:+1		32.1182	20.8939	1.5372
ENSGALG00000045347	2	2:375288-376557:-1		10.5438	6.86177	1.53661
ENSGALG00000034702	Z	Z:41967260-41974126:+1		1.2535	0.815769	1.53659
GPATCH3	23	23:1831568-1836134:-1	G-patch domain containing 3	9.5395	6.21212	1.53563
LOC107049955	.	.	acidic proline-rich protein PRP25-like	1.48433	0.967962	1.53346
FGL2	1	1:12776938-12782933:+1	fibrinogen like 2	12.1633	7.93231	1.53339
PFKFB3	1	1:3543236-3579756:+1	6-phosphofructo-2-kinase/fructose-2,6-biphosphatase 3	58.7903	38.4097	1.53061
FAM78B	8	8:4318428-4322198:+1	family with sequence similarity 78 member B	2.72217	1.781	1.52845
PLEKHM3	7	7:12077100-12162229:+1	pleckstrin homology domain containing M3	26.8063	17.5482	1.52759
ENSGALG00000040075	AADN04012524.1	AADN04012524.1:1472-3986:+1		4.08133	2.672	1.52745
ENSGALG00000016516	3	3:104910569-104911398:+1		11.4372	7.49012	1.52697
RP11-49K24.9	.	.	Protein LOC101930165	4.43067	2.90162	1.52697
LOC100859870	.	.	platelet glycoprotein VI-like	20.7825	13.6168	1.52624
PCDH9	1	1:159096610-159285693:+1	protocadherin 9	1.14967	0.753423	1.52592
ENSGALG00000001536	20	20:981766-1021213:-1		1.82833	1.19985	1.52381
MPV17L2	28	28:4010077-4012194:-1	MPV17 mitochondrial inner membrane protein like 2	12.1583	7.98158	1.5233
ENSGALG00000019147	1	1:129240115-129253041:-1		247.172	162.45	1.52152
RASD1	14	14:4811826-4813672:-1	ras related dexamethasone induced 1	1.3035	0.856769	1.52141
FGFBP2	4	4:77137751-77139658:+1	fibroblast growth factor binding protein 2	1.6395	1.07777	1.5212
LOC100858818	.	.	platelet glycoprotein VI-like	4.56017	2.99777	1.52119
HSPA2	5	5:52952583-52954953:-1	heat shock protein family A (Hsp70) member 2	210.224	138.216	1.52098
MYO15L	.	.	myosin-XV-like	5.8335	3.83554	1.52091
ENSGALG00000040174	1	1:48176561-48177760:+1		51.6557	33.9936	1.51957
SYT10	1	1:58696926-58729393:+1	synaptotagmin X	6.47367	4.26065	1.51941
ENSGALG00000033048	AADN04017173.1	AADN04017173.1:602-4151:+1		3.00267	1.97635	1.5193
HGF	1	1:10650557-10710329:+1	hepatocyte growth factor (hepapoietin A; scatter factor)	5.86933	3.86346	1.51919
GRAMD3	Z	Z:78953540-78985602:-1	GRAM domain containing 3	11.0195	7.25515	1.51885
KLF15	12	12:10637434-10650045:-1	Kruppel-like factor 15	23.42	15.4356	1.51727
ENSGALG00000029697	AADN04010246.1	AADN04010246.1:1421-8713:+1		3.61333	2.38208	1.51688
ENSGALG00000044942	10	10:576724-578192:+1		1.88017	1.23954	1.51683
ENSGALG00000045596	1	1:88691478-88699579:+1		32.52	21.4419	1.51666
ENSGALG00000033068	11	11:391022-394724:+1		23.0757	15.2188	1.51626
LOC422002	.	.	GTPase SLIP-GC-like	5.1585	3.40227	1.51619
ZDHHC4	14	14:6544900-6550781:-1	zinc finger, DHHC-type containing 4	6.3315	4.17635	1.51604
HAL	1	1:45679241-45691863:-1	histidine ammonia-lyase	1.07083	0.706692	1.51528
THAP5	1	1:28446182-28454715:+1	THAP domain containing 5	38.3418	25.3118	1.51478
ENSGALG00000041593	4	4:47293204-47302803:+1		5.52333	3.64673	1.5146
PMEL	33	33:612990-617697:-1	melanocyte protein PMEL precursor	3.92983	2.59473	1.51454
ENSGALG00000022802	KQ759337.1	KQ759337.1:4296-14033:-1		3.26967	2.15912	1.51435
IL8	4	4:51283110-51286274:+1	Interleukin-8	1042.45	688.722	1.51361
ENSGALG00000023703	19	19:6062311-6070062:-1		9.23383	6.10077	1.51355
ENSGALG00000016322	3	3:88712831-88719837:+1		2.072	1.36908	1.51343
LOC396380	.	.	glutathione transferase	4.14367	2.73835	1.5132
B3GNTL1	18	18:3160548-3269810:+1	UDP-GlcNAc:betaGal beta-1,3-N-acetylglucosaminyltransferase-like 1	7.535	4.98358	1.51197
ENSGALG00000044550	5	5:1015024-1015986:+1		1.9305	1.27704	1.5117
MPG	14	14:12094812-12108296:+1	N-methylpurine DNA glycosylase	22.0817	14.6103	1.51138
SRGAP3	12	12:19376465-19441407:-1	SLIT-ROBO Rho GTPase activating protein 3	10.7983	7.14827	1.51062
ENSGALG00000000720	23	23:1432743-1440630:+1		22.1145	14.6442	1.51012
LOC419563	.	.	interferon-induced guanylate-binding protein 1-like	22.1145	14.6442	1.51012
ENSGALG00000041149	AADN04016040.1	AADN04016040.1:414-4564:+1		9.2985	6.15812	1.50996
AHR	.	.	aryl hydrocarbon receptor	1.755	1.16231	1.50993
ENSGALG00000010032	3	3:27391199-27432650:-1		1.6525	1.09454	1.50977
PTPN6	1	1:77339324-77348760:+1	protein tyrosine phosphatase, non-receptor type 6	121.151	80.2461	1.50974
ENSGALG00000029524	KQ759610.1	KQ759610.1:8191-14355:+1		27.5315	18.2362	1.50972
ENSGALG00000014978	Z	Z:23461599-23577675:-1		23.1567	15.3508	1.50849
GGT5	15	15:8402897-8419021:+1	gamma-glutamyltransferase 5	26.218	17.386	1.50799
ENSGALG00000035235	AADN04001768.1	AADN04001768.1:11741-13169:-1		34.69	23.0141	1.50734
LOC100857615	.	.	platelet glycoprotein VI-like	34.69	23.0141	1.50734
C8orf4	22	22:2509377-2510527:+1	chromosome 8 open reading frame 4	8.00283	5.31346	1.50614
SOCS7	.	.	suppressor of cytokine signaling 7	1.59233	1.05746	1.50581
MPP7	.	.	membrane protein, palmitoylated 7 (MAGUK p55 subfamily member 7)	2.83167	1.88158	1.50494
LOC418424	.	.	uncharacterized LOC418424	3.02667	2.01119	1.50491
HIF1A	.	.	hypoxia inducible factor 1, alpha subunit (basic helix-loop-helix transcription factor)	35.2285	23.4534	1.50206
LOC107049209	.	.	olfactory receptor 14J1-like	1.5125	1.00723	1.50164
ENSGALG00000039902	KQ759336.1	KQ759336.1:20470-26929:-1		4.82817	3.21573	1.50142
RALGPS1	17	17:10765226-10860650:+1	Ral GEF with PH domain and SH3 binding motif 1	1.2965	0.863962	1.50065
ENSGALG00000033601	AADN04018475.1	AADN04018475.1:211-3937:+1		143.126	95.3927	1.50039
ENSGALG00000033682	AADN04010902.1	AADN04010902.1:4031-7740:+1		3.97667	5.96785	0.666349
SLC38A4	1	1:31101534-31122087:-1	solute carrier family 38 member 4	7.50317	11.2608	0.666308
ENSGALG00000042236	AADN04001811.1	AADN04001811.1:21-20443:+1		0.818333	1.22869	0.66602
ENSGALG00000040002	25	25:1286062-1293307:-1		17.3458	26.0689	0.665385
LOC107052128	.	.	thrombospondin type-1 domain-containing protein 4-like	0.779333	1.17135	0.665331
ENSGALG00000026363	2	2:81004787-81009194:-1		2.49733	3.75492	0.665082
NAA38	.	.	N(alpha)-acetyltransferase 38, NatC auxiliary subunit	5.35067	8.04865	0.66479
ENSGALG00000034806	2	2:124848271-124860833:+1		1.35967	2.04538	0.664749
OTULIN	2	2:76489687-76496184:-1	OTU deubiquitinase with linear linkage specificity	1.185	1.783	0.66461
ID4	2	2:59931746-59933580:-1	inhibitor of DNA binding 4, HLH protein	9.11683	13.7339	0.663819
GFPT1	22	22:117455-145268:+1	glutamine--fructose-6-phosphate transaminase 1	22.9742	34.6134	0.663736
ENSGALG00000009291	3	3:17239079-17259481:-1		2.31317	3.4855	0.663654
EPHX1	.	.	epoxide hydrolase 1, microsomal (xenobiotic)	6.939	10.4566	0.663601
NDNF	.	.	neuron-derived neurotrophic factor	1.59567	2.40496	0.663489
MGLL	12	12:9622177-9678239:+1	monoglyceride lipase	19.7848	29.8211	0.663451
ENSGALG00000046258	2	2:126387618-126404515:+1		2.6925	4.05873	0.663385
SYTL4	.	.	synaptotagmin-like 4	3.047	4.59873	0.662574
FYB	Z	Z:12272092-12333739:-1	FYN binding protein	70.898	107.048	0.662303
CAVIN1	27	27:5335537-5350085:-1	caveolae associated protein 1	8.36833	12.6368	0.662221
ENSGALG00000008018	20	20:14008762-14012151:-1		6.7745	10.2376	0.661729
FGL1	4	4:63266296-63284864:+1	fibrinogen like 1	5.93717	8.97281	0.661684
FAM18B1	.	.	family with sequence similarity 18, member B1	18.8848	28.5569	0.661305
SFXN1	13	13:10021724-10056809:+1	sideroflexin 1	23.8817	36.1533	0.660567
ECE2	9	9:15930201-15936984:-1	endothelin converting enzyme 2	3.235	4.89838	0.660422
ENSGALG00000043211	AADN04001422.1	AADN04001422.1:12278-14226:-1		4.535	6.86719	0.660386
XKR5	3	3:107936544-107941195:+1	XK, Kell blood group complex subunit-related family, member 5	0.724667	1.09777	0.660127
LOC418892	.	.	complement C4-like	1.37833	2.08831	0.660024
LOC101748617	.	.	ras GTPase-activating-like protein IQGAP3-like	0.992667	1.50423	0.659916
BFIV21	16	16:73915-76152:+1		109.118	165.374	0.659826
OLFM3	8	8:11447671-11502314:+1	olfactomedin 3	2.65067	4.01735	0.659805
MDK	5	5:23648664-23650689:-1	midkine (neurite growth-promoting factor 2)	11.4947	17.4238	0.659712
ENSGALG00000005204	15	15:8146019-8151711:+1		32.5567	49.4007	0.659033
LOC107050326	.	.	uncharacterized LOC107050326	0.855667	1.29885	0.65879
LOC107051404	.	.	proline-rich extensin-like protein EPR1	0.741667	1.12658	0.658336
C27H17ORF105	.	.	chromosome 27 open reading frame, human C17orf105	0.808167	1.2285	0.657848
ENSGALG00000046316	27	27:3483420-3486566:-1		0.808167	1.2285	0.657848
NPDC1	17	17:953350-971844:-1	neural proliferation, differentiation and control 1	4.9735	7.56035	0.65784
ENSGALG00000009154	4	4:18141409-18156158:+1		1.982	3.01369	0.657665
TDRP	3	3:91988096-92012275:+1	testis development related protein	1.69567	2.57904	0.65748
ENSGALG00000034916	AADN04001796.1	AADN04001796.1:1420-3612:+1		0.803167	1.22177	0.65738
SEPT4	.	.	septin 4	25.6268	38.9978	0.657135
SATB1	2	2:35245698-35334420:-1	SATB homeobox 1	4.01217	6.10792	0.656879
CD44	.	.	CD44 molecule (Indian blood group)	19.2473	29.3105	0.656669
EFCAB10	1	1:14012404-14013602:-1	EF-hand calcium binding domain 10	0.67	1.02119	0.656096
CEBPD	2	2:108248344-108249313:-1	CCAAT/enhancer binding protein (C/EBP), delta	8.9075	13.5775	0.656047
ACKR3	7	7:5036416-5041363:-1	atypical chemokine receptor 3	2.065	3.1485	0.655868
CXCR7	.	.	chemokine (C-X-C motif) receptor 7	0.688333	1.04954	0.655844
ENSGALG00000008970	4	4:17270287-17365352:+1		32.2128	49.1256	0.655724
FAM213A	6	6:4394067-4405386:-1	family with sequence similarity 213 member A	13.7597	21.001	0.655192
BMP8B	.	.	bone morphogenetic protein 8b	2.52917	3.86027	0.655179
EPHA1	1	1:77496575-77530024:+1	EPH receptor A1	0.656	1.00135	0.655118
GNAO1	11	11:2264902-2382477:+1	guanine nucleotide binding protein (G protein), alpha activating activity polypeptide O	0.8175	1.24838	0.654846
SLC7A1	1	1:175461084-175479666:+1	solute carrier family 7 member 1	3.95517	6.04088	0.654733
GCAT	1	1:51158258-51162538:-1	glycine C-acetyltransferase	2.0765	3.17212	0.65461
PARVA	5	5:7919891-7948685:-1	parvin, alpha	9.045	13.8205	0.654464
GTSE1	1	1:15710309-15721324:+1	G2 and S-phase expressed 1	1.499	2.29104	0.654288
RGN	1	1:130158053-130170776:-1	regucalcin	1.2025	1.83846	0.654079
Rchy1	4	4:34858221-34863084:+1	ring finger and CHY zinc finger domain containing 1	2.29333	3.50815	0.653715
ARPC1A	.	.	actin related protein 2/3 complex, subunit 1A, 41kDa	1.93167	2.95504	0.653686
ZNF423	11	11:6819994-7018204:+1	zinc finger protein 423	4.8635	7.44081	0.653625
CPM	1	1:35315781-35347355:-1	carboxypeptidase M	1.78833	2.73673	0.653456
ADAM19	13	13:11323099-11349859:+1	ADAM metallopeptidase domain 19	1.23667	1.89258	0.65343
CYP27A1	7	7:22543083-22545995:+1	cytochrome P450, family 27, subfamily A, polypeptide 1	0.9675	1.48169	0.65297
GABRD	21	21:1843701-1851220:-1	gamma-aminobutyric acid (GABA) A receptor, delta	2.879	4.41073	0.652726
ENSGALG00000044779	AADN04002785.1	AADN04002785.1:7606-9416:+1		0.7285	1.11654	0.652463
ENSGALG00000003657	19	19:5722923-5726777:-1		0.875167	1.34135	0.652454
COL8A2	23	23:4146476-4152419:+1	collagen type VIII alpha 2 chain	2.99233	4.58827	0.65217
K123	.	.	K123 protein	203.757	312.458	0.65211
k123	1	1:3465887-3476005:+1		33.9593	52.0762	0.652109
DLX5	2	2:24479856-24482255:-1	distal-less homeobox 5	3.41	5.23065	0.651926
GRXCR2	13	13:17852826-17855625:-1	glutaredoxin, cysteine rich 2	0.672333	1.03188	0.651559
LOC107056386	.	.	transcription initiation factor TFIID subunit 1-like	1.13867	1.74831	0.651296
ENSGALG00000005209	2	2:1115116-1133998:+1		2.83383	4.35188	0.651174
ENSGALG00000028652	Z	Z:1692074-1692647:+1		0.731833	1.12415	0.651008
DFNA5	2	2:31663719-31688494:-1	deafness, autosomal dominant 5	1.1335	1.74177	0.650775
ENSGALG00000016893	1	1:145871889-145950703:+1		2.211	3.39877	0.65053
DNAJA1	Z	Z:70593750-70601481:+1	DnaJ heat shock protein family (Hsp40) member A1	55.0273	84.6435	0.650107
ENSGALG00000038984	23	23:5470595-5477143:+1		2.4215	3.7285	0.649457
LOC107056637	.	.	titin-like	7.6105	11.7252	0.649075
EBF3	6	6:34199151-34316515:-1	early B-cell factor 3	0.889667	1.37162	0.648627
RIMBP2	15	15:3240516-3345753:+1	RIMS binding protein 2	0.826	1.27431	0.648195
EGFR	2	2:51987050-52134485:-1	epidermal growth factor receptor	1.7495	2.69927	0.648138
ENSGALG00000036573	AADN04008284.1	AADN04008284.1:6542-8457:-1		1.08167	1.66912	0.648048
ZNF462	Z	Z:55489590-55547342:+1	zinc finger protein 462	1.604	2.47831	0.647216
BECN1	.	.	beclin 1, autophagy related	0.743167	1.14869	0.646968
ENKUR	2	2:16734597-16743605:+1	enkurin, TRPC channel interacting protein	1.46367	2.26346	0.64665
SNTA1	20	20:2349512-2357585:+1	syntrophin alpha 1	6.09367	9.42515	0.646532
ENSGALG00000014855	Z	Z:13428436-13558478:+1		6.56183	10.1558	0.646116
ENSGALG00000037088	KQ759505.1	KQ759505.1:384198-464577:-1		6.56183	10.1558	0.646116
RGS4	8	8:3687052-3692405:+1	regulator of G-protein signaling 4	1.98383	3.07192	0.645795
LOC107056562	.	.	delta-1-pyrroline-5-carboxylate synthase-like	16.4145	25.4359	0.645328
RUSC2	Z	Z:8966840-8999279:+1	RUN and SH3 domain containing 2	1.13767	1.76446	0.644767
CPQ	2	2:127544122-127708621:+1	carboxypeptidase Q	9.605	14.9154	0.643964
C13H5ORF45	.	.	chromosome 13 open reading frame, human C5orf45	4.78383	7.42938	0.643907
MGP	1	1:48052894-48058138:+1	matrix Gla protein	555.177	862.298	0.643834
PER3	21	21:272583-291803:-1	period homolog 3 (Drosophila)	3.942	6.12281	0.643822
VAT1L	11	11:14182753-14226089:+1	vesicle amine transport 1-like	1.996	3.10312	0.643225
ENSGALG00000045009	4	4:11449727-11450283:+1		1.18333	1.84042	0.642968
ENSGALG00000014750	1	1:78071368-78073633:+1		1.1515	1.79385	0.641917
ENSGALG00000044384	2	2:103178832-103180087:-1		0.763167	1.18908	0.641814
MND1	4	4:20040123-20078631:+1	meiotic nuclear divisions 1	2.804	4.36996	0.641653
MAZ	.	.	MYC-associated zinc finger protein (purine-binding transcription factor)	1.1785	1.83685	0.641589
ANTXR1	22	22:156208-246299:-1	anthrax toxin receptor 1	0.9245	1.44154	0.641329
TMTC2	1	1:40829223-41086008:+1	transmembrane and tetratricopeptide repeat containing 2	3.08483	4.82008	0.639997
EDNRA	4	4:32158004-32187519:+1	endothelin receptor type A	11.0088	17.2098	0.639684
THSD4	10	10:6291473-6524226:+1	thrombospondin, type I, domain containing 4	2.4085	3.76565	0.639597
ENSGALG00000034655	6	6:35375486-35423274:+1		4.6345	7.24665	0.639537
LOC101748328	.	.	kelch-like protein 9-like	0.858333	1.34331	0.63897
ENSGALG00000035206	33	33:754500-755997:-1		23.4138	36.6582	0.638707
ENSGALG00000033498	5	5:15970088-15971209:+1		35.7375	55.9573	0.638657
ENSGALG00000043426	AADN04001868.1	AADN04001868.1:10945-11772:-1		3.781	5.92319	0.638338
LOC101748892	.	.	maestro heat-like repeat-containing protein family member 2A-like	3.99033	6.25146	0.638304
PDZRN3	12	12:16642419-16762419:-1	PDZ domain containing ring finger 3	3.282	5.149	0.637405
PTPRM	2	2:99160698-99619495:-1	protein tyrosine phosphatase, receptor type, M	1.17733	1.849	0.636741
ENSGALG00000032996	AADN04008694.1	AADN04008694.1:2023-2735:+1		0.830167	1.30481	0.636237
MORN2	3	3:16578265-16582576:+1	MORN repeat containing 2	2.353	3.69942	0.636045
THBS2	3	3:41483185-41514674:+1	thrombospondin 2	32.2528	50.7872	0.635058
ANKRD6	.	.	ankyrin repeat domain 6	0.7755	1.22146	0.634895
TMEM179	5	5:51484528-51491786:-1	transmembrane protein 179	0.9975	1.57185	0.634604
LOC107049805	.	.	structural maintenance of chromosomes protein 1A-like	2.64317	4.17004	0.633847
C1QTNF4	5	5:22762420-22779740:+1	C1q and TNF related 4	53.0332	83.6834	0.633736
ENSGALG00000030503	AADN04010127.1	AADN04010127.1:2-6096:-1		0.711167	1.12296	0.633296
ENSGALG00000036629	13	13:1851537-1852461:+1		1.33417	2.10873	0.632687
HEXA	10	10:1546320-1555575:-1	beta-hexosaminidase subunit alpha precursor	116.404	184.002	0.632623
LTBP1	3	3:31210825-31393401:-1	latent transforming growth factor beta binding protein 1	124.527	196.881	0.632499
Id1	20	20:10207842-10209004:+1	inhibitor of DNA binding 1, HLH protein	7.01583	11.0944	0.632377
MPP6	2	2:31634809-31655793:+1	membrane protein, palmitoylated 6 (MAGUK p55 subfamily member 6)	6.502	10.2825	0.632336
PHTF1	26	26:3719995-3729665:-1	putative homeodomain transcription factor 1	2.67917	4.23862	0.632085
ENSGALG00000028327	5	5:22884776-22895233:-1		3.1845	5.03927	0.631937
COL15A1	2	2:55990571-56094186:+1	collagen, type XV, alpha 1	1.93417	3.06123	0.631826
COL25A1	.	.	collagen, type XXV, alpha 1	0.876167	1.38673	0.631822
ENSGALG00000033647	5	5:36040301-36043588:-1		1.31333	2.08054	0.631247
C12orf75	1	1:54229629-54246246:-1	chromosome 12 open reading frame 75	66.0312	104.623	0.631134
ENSGALG00000036142	KQ759405.1	KQ759405.1:101698-105996:-1		2.5075	3.97331	0.631086
ENC1	Z	Z:24273768-24275537:+1	ectodermal-neural cortex 1	2.34383	3.71446	0.631002
MAP1LC3C	3	3:35808585-35810392:+1	microtubule-associated protein 1 light chain 3 gamma	0.682667	1.08208	0.630886
LHFPL5	26	26:93767-97080:+1	lipoma HMGIC fusion partner-like 5	1.214	1.92612	0.630284
LOC107055022	.	.	uncharacterized LOC107055022	2.75883	4.37742	0.630241
ST8SIA6	2	2:19761176-19794294:+1	alpha-2,8-sialyltransferase 8F	1.99583	3.17065	0.629471
LOC426093	.	.	digestive cysteine proteinase 1-like	0.749333	1.19092	0.629204
IYD	3	3:48579165-48594232:+1	iodotyrosine deiodinase	2.50133	3.98212	0.628142
LZTFL1	.	.	leucine zipper transcription factor-like 1	4.445	7.07646	0.628139
WIPF3	2	2:33916994-33935957:+1	WAS/WASL interacting protein family, member 3	0.772667	1.23235	0.626988
COMTD1	6	6:14824430-14830844:+1	catechol-O-methyltransferase domain containing 1	42.4915	67.8322	0.626421
ENSGALG00000009095	3	3:7621411-7640925:+1		2.74483	4.38338	0.62619
CD40	20	20:10824114-10827796:+1	CD40 molecule, TNF receptor superfamily member 5	53.8015	85.9425	0.626017
COL21A1	3	3:87551101-87625448:+1	collagen, type XXI, alpha 1	1.19417	1.90923	0.62547
ENSGALG00000009959	1	1:35565047-35594362:+1		0.794167	1.27219	0.62425
AKR1D1	1	1:56606803-56640860:+1	aldo-keto reductase family 1 member D1	10.3187	16.5337	0.624099
ENSGALG00000026111	5	5:12481383-12487847:-1		2.57633	4.12892	0.623972
LOC416959	.	.	melanotransferrin-like	0.927167	1.486	0.623934
ENSGALG00000032414	AADN04004890.1	AADN04004890.1:2081-7490:+1		1.17583	1.88477	0.623861
KMO	7	7:7157221-7167744:+1	kynurenine 3-monooxygenase (kynurenine 3-hydroxylase)	1.04067	1.66931	0.623412
PLCXD1	1	1:130111878-130130047:-1	phosphatidylinositol specific phospholipase C X domain containing 1	39.9633	64.1295	0.623167
MICALL2	14	14:2534246-2556248:-1	MICAL-like 2	17.6778	28.3761	0.622983
IL31RA	Z	Z:16989926-17012645:+1	interleukin 31 receptor A	1.95017	3.13042	0.622972
ENSGALG00000043064	17	17:992193-995196:-1		5822.15	9346.43	0.622928
PTX3	9	9:22816706-22822292:-1	pentraxin 3	62.1997	99.8531	0.622912
DAB2	Z	Z:12349471-12359241:-1	Dab, mitogen-responsive phosphoprotein, homolog 2 (Drosophila)	6.89867	11.0867	0.622248
BBOX1	5	5:3484747-3518031:+1	butyrobetaine (gamma), 2-oxoglutarate dioxygenase (gamma-butyrobetaine hydroxylase) 1	0.912333	1.46692	0.621937
LOC107057253	.	.	atherin-like	1.018	1.63688	0.621913			Down in H
ENSGALG00000045804	AADN04001761.1	AADN04001761.1:13243-13726:-1		1.05467	1.70054	0.620196
ENSGALG00000020775	6	6:20994565-21006702:-1		1.812	2.92358	0.619789
RAMP3	2	2:54647530-54696892:+1	receptor (G protein-coupled) activity modifying protein 3	1.31617	2.12392	0.619687
TGM2	20	20:10568680-10578655:+1	protein-glutamine gamma-glutamyltransferase 2	37.1577	60.0539	0.618738
PRICKLE1	1	1:29649659-29708429:-1	prickle planar cell polarity protein 1	1.0155	1.64335	0.617946
PELI2	5	5:56087033-56150956:-1	pellino E3 ubiquitin protein ligase family member 2	2.41483	3.90862	0.617823
ENSGALG00000036742	19	19:2515845-2605834:+1		1.8745	3.03446	0.617737
ENSGALG00000010335	8	8:21504570-21529508:-1		9.7265	15.7493	0.617584
TSKU	1	1:193483508-193498274:-1	Tsukushin	6.29017	10.1865	0.617503
ENSGALG00000038710	1	1:71890196-71896378:-1		2.03467	3.2985	0.616846
LOC107057172	.	.	endogenous retrovirus group K member 18 Pol protein-like	68.5063	111.082	0.616717
LRRC17	1	1:12869754-12885148:+1	leucine rich repeat containing 17	11.8542	19.2415	0.616074
ENSGALG00000004503	19	19:6576258-6579271:-1		6.21283	10.0875	0.615892
ENSGALG00000027534	13	13:13010726-13018170:-1		18.8855	30.6751	0.615663
PLXNA4B	.	.	plexin A4, B	0.9185	1.49215	0.615553
DIRAS2	Z	Z:43996928-43997527:-1	DIRAS family GTPase 2	1.254	2.03723	0.615541
TMEM9	26	26:901105-904818:+1	transmembrane protein 9	1.6485	2.67927	0.61528
PSD3	Z	Z:54574433-54695402:-1	pleckstrin and Sec7 domain containing 3	10.7082	17.4275	0.614439
LOC107054428	.	.	glutamate receptor-interacting protein 1-like	1.4015	2.28177	0.614216
SEMA3B	12	12:3221466-3225875:+1	sema domain, immunoglobulin domain (Ig), short basic domain, secreted, (semaphorin) 3B	1.205	1.96227	0.614085
ENSGALG00000045362	5	5:1570918-1572157:+1		0.626167	1.01977	0.614028
ANK3	6	6:8746641-9091849:+1	ankyrin 3, node of Ranvier (ankyrin G)	2.48833	4.05388	0.613815
ACSL1	4	4:39713691-39752253:+1	acyl-CoA synthetase long-chain family member 1	217.747	354.898	0.613548
UGT8	4	4:56620972-56646024:-1	2-hydroxyacylsphingosine 1-beta-galactosyltransferase precursor	5.008	8.16519	0.613335
EPB41L5	7	7:25578779-25609136:+1	erythrocyte membrane protein band 4.1 like 5	0.781	1.27523	0.612438
MYLK	7	7:27324149-27507722:-1	myosin light chain kinase	4.15567	6.78927	0.612093
ITGA11	10	10:19181613-19214397:-1	integrin, alpha 11	2.5655	4.19381	0.611735
MAPK11	1	1:20405293-20435716:-1	mitogen-activated protein kinase 11	6.3025	10.3043	0.611635
ENSGALG00000005257	8	8:11858182-11864932:+1		19.0033	31.0901	0.611235
TXK	4	4:66975729-66988120:+1	TXK tyrosine kinase	1.6875	2.76285	0.610783
C16orf45	14	14:7521315-7561630:+1	chromosome 16 open reading frame 45	10.6565	17.4536	0.610563
PPP2R2C	4	4:80124386-80297792:-1	protein phosphatase 2, regulatory subunit B, gamma	30.2255	49.5173	0.610403
SCG3	10	10:9089657-9116974:-1	secretogranin-3 isoform 2 precursor	1.44267	2.36523	0.609948
MOXD1	3	3:57097209-57149346:+1	monooxygenase DBH like 1	12.6042	20.6712	0.609744
SCD	6	6:17493789-17509405:-1	stearoyl-CoA desaturase	72.4978	118.944	0.609512
ENSGALG00000011894	1	1:49442475-49451655:+1		2.45817	4.03704	0.608903
CAMK2N1	21	21:4882805-4883526:-1	calcium/calmodulin dependent protein kinase II inhibitor 1	1.27233	2.08985	0.608817
CPLX1	Z	Z:52264712-52364226:+1	complexin 1	3.45333	5.68062	0.607915
C7orf50	14	14:2277633-2300490:-1	chromosome 14 open reading frame, human C7orf50	5.804	9.55519	0.607418
HELT	.	.	helt bHLH transcription factor	1.13483	1.86865	0.6073
ENSGALG00000046419	Z	Z:68205453-68208057:+1		0.769833	1.26973	0.606297
ENSGALG00000011086	3	3:40139164-40141584:-1	Actin, alpha skeletal muscle	2.53533	4.18242	0.606188
SLC35G1	6	6:20269683-20275054:-1	solute carrier family 35, member G1	0.929333	1.53346	0.606036
ENSGALG00000042519	AADN04000787.1	AADN04000787.1:22393-29696:-1		9.58617	15.8192	0.605985
LOC107049470	.	.	protein MANBAL-like	47.9305	79.0959	0.60598
ANKRD50	4	4:53218480-53254834:+1	ankyrin repeat domain 50	1.18667	1.95862	0.60587
ENSGALG00000044822	AADN04001807.1	AADN04001807.1:13467-14790:+1		0.725167	1.19765	0.605489
MEF2B	.	.	myocyte enhancer factor 2B	0.7885	1.30285	0.605213
SLC7A5	11	11:18186088-18218511:-1	solute carrier family 7 member 5	36.1133	59.6751	0.605166
ENSGALG00000035960	AADN04004153.1	AADN04004153.1:21-11321:+1		1.28533	2.12396	0.605158
DZANK1	3	3:15407152-15427279:+1	double zinc ribbon and ankyrin repeat domains 1	0.795833	1.31523	0.60509
LOC101751171	.	.	germin-like protein subfamily 2 member 2-like	43.9695	72.7579	0.604326
ENSGALG00000033302	AADN04008809.1	AADN04008809.1:2963-8716:-1		1.9355	3.2115	0.602678
INPPL1	4	4:1242567-1251009:-1	inositol polyphosphate phosphatase like 1	9.82067	16.3103	0.602116
ENSGALG00000035031	2	2:121291569-121294409:-1		9.26167	15.3886	0.601853
ENSGALG00000042427	4	4:50061940-50067610:-1		1.03883	1.72685	0.601578
AOX1	7	7:11249381-11285636:+1	aldehyde oxidase 1	2.37517	3.94827	0.601572
DYNLRB2	11	11:15331182-15335926:+1	dynein light chain roadblock-type 2	4.18983	6.97131	0.601011
ENSGALG00000031701	AADN04003712.1	AADN04003712.1:3203-6050:-1		4.44283	7.39281	0.600967
PTGR2	5	5:26068174-26082465:-1	prostaglandin reductase 2	2.15817	3.593	0.600659
LOC101752260	.	.	uncharacterized LOC101752260	1.01317	1.68715	0.600518
TNC	17	17:3145480-3214636:-1	tenascin C	58.0732	96.7549	0.600209
WNK4	27	27:5462100-5472837:+1	WNK lysine deficient protein kinase 4	1.08467	1.80758	0.600067
CCR7	27	27:4891171-4899901:-1	C-C motif chemokine receptor 7	6.929	11.5512	0.599853
FRZB	7	7:2312660-2328060:+1	frizzled-related protein	58.6713	97.8193	0.599793
LOC107056139	.	.	pantetheinase-like	0.791	1.32204	0.598318
ENSGALG00000033283	AADN04007470.1	AADN04007470.1:135-9448:+1		1.582	2.64419	0.598292
CPNE9	12	12:11480811-11486287:+1	copine family member IX	0.8035	1.34342	0.598099
CADPS	.	.	Ca++-dependent secretion activator	1.10167	1.8435	0.597595
GCHFR	5	5:960109-967796:+1	GTP cyclohydrolase I feedback regulator	14.6368	24.5318	0.596647
LGALS2	1	1:51250968-51253146:+1	lectin, galactoside-binding, soluble, 2	10.3867	17.4105	0.596576
PFKFB2	26	26:2618234-2634075:+1	6-phosphofructo-2-kinase/fructose-2,6-biphosphatase 2	1.74617	2.9335	0.59525
VTN	19	19:5643262-5647788:-1	vitronectin	0.793667	1.33342	0.59521
ENSGALG00000033191	1	1:48099109-48099504:-1		3.88217	6.53042	0.594474
LOC107057319	.	.	eyes absent homolog 2-like	0.808167	1.35988	0.594291
COL4A2	1	1:138904303-139053712:+1	collagen, type IV, alpha 2	11.906	20.0369	0.594203
SIX2	3	3:25957358-25960417:-1	SIX homeobox 2	2.83733	4.77965	0.593627
C9H3ORF55	.	.	chromosome 9 open reading frame, human C3orf55	8.54483	14.4026	0.593283
GUCY1A2	1	1:180825307-180952539:+1	guanylate cyclase 1 soluble subunit alpha 2	2.7785	4.68538	0.593014
CEP85	23	23:222695-233308:-1	centrosomal protein 85kDa	2.7885	4.70496	0.592672			Up in H
LOC107055016	.	.	transcription elongation factor A protein 3-like	2.04933	3.45804	0.592629
ENSGALG00000015010	4	4:79167085-79187711:+1	Neuron-specific protein family member 1	0.6675	1.12715	0.5922
APCDD1	2	2:98537292-98568148:+1	APC down-regulated 1	0.805667	1.36131	0.591833
HSPB8	15	15:9765688-9767739:-1	heat shock protein family B (small) member 8	1.02483	1.73169	0.59181
WNT4	21	21:6322863-6334599:+1	Protein Wnt-4	0.989667	1.67319	0.591484
GFPT2	13	13:13929617-13940653:+1	glutamine-fructose-6-phosphate transaminase 2	20.8788	35.328	0.590999
RRAD	11	11:11349973-11355598:+1	RRAD, Ras related glycolysis inhibitor and calcium channel regulator	10.1583	17.2095	0.590276
ENSGALG00000034100	10	10:19632491-19663602:-1		6.14817	10.4223	0.589902
FAH	10	10:12567078-12577916:-1	fumarylacetoacetate hydrolase	0.991167	1.68031	0.589872
SLC39A14	AADN04002725.1	AADN04002725.1:8179-17083:+1	solute carrier family 39 (zinc transporter), member 14	7.64117	12.9591	0.589638
INSC	5	5:10574171-10677542:+1	inscuteable homolog (Drosophila)	2.63217	4.46535	0.589465
GPR158	2	2:16497663-16678504:-1	G protein-coupled receptor 158	0.716667	1.21585	0.589439
NEO1	10	10:1742727-1938673:+1	neogenin 1	3.18267	5.39985	0.5894
ENPP2	.	.	ectonucleotide pyrophosphatase/phosphodiesterase 2	5.23483	8.89135	0.588756
STRBP	17	17:9383431-9417159:-1	spermatid perinuclear RNA binding protein	0.743333	1.26469	0.587758
TMEM246	Z	Z:65115046-65116233:+1	transmembrane protein 246	5.2925	9.01885	0.586827
UGT2A1	.	.	UDP glucuronosyltransferase 2 family, polypeptide A1, complex locus	17.236	29.3818	0.586621
SDK2	18	18:9107305-9148769:-1	sidekick cell adhesion molecule 2	0.797167	1.35938	0.586417
EFEMP1	3	3:242964-294071:-1	EGF containing fibulin like extracellular matrix protein 1	18.2927	31.2145	0.586031
APOBEC4	.	.	apolipoprotein B mRNA editing enzyme, catalytic polypeptide-like 4 (putative)	4.55567	7.77681	0.585802
TP63	9	9:14094193-14188390:-1	tumor protein p63	1.08067	1.84519	0.585666
EPB41L4A	Z	Z:46187204-46301052:+1	erythrocyte membrane protein band 4.1 like 4A	0.871	1.48788	0.585395
LMO7	1	1:154868242-154908783:-1	LIM domain 7	7.46317	12.757	0.585025
SERPINF1	19	19:5406929-5413790:+1	serpin family F member 1	102.218	174.824	0.584692
SFRP4	2	2:46310717-46320326:+1	secreted frizzled-related protein 4	0.7685	1.31458	0.584599
VAMP2	.	.	vesicle-associated membrane protein 2 (synaptobrevin 2)	1.836	3.14296	0.584162
MMP23B	21	21:2025702-2032615:-1	matrix metallopeptidase 23B	1.37217	2.34973	0.583968
lasp-2	2	2:18140059-18382967:+1		1.22267	2.09454	0.58374
DNER	9	9:9937753-10044440:-1	delta/notch like EGF repeat containing	0.741333	1.27085	0.583338
FGFRL1	4	4:85648812-85814057:-1	fibroblast growth factor receptor-like 1 precursor	10.0648	17.2693	0.582816
ENSGALG00000032574	AADN04003691.1	AADN04003691.1:2835-7718:-1		9.9995	17.1765	0.58216
TSPEAR	9	9:5184138-5190382:+1	thrombospondin-type laminin G domain and EAR repeats	1.88467	3.23831	0.581991
ENSGALG00000029840	AADN04001279.1	AADN04001279.1:3890-5052:-1		1.16733	2.00738	0.58152
NRARP	17	17:1143212-1143556:-1	NOTCH-regulated ankyrin repeat protein	2.72717	4.70092	0.580134
PKIA	2	2:120755020-120759930:+1	cAMP-dependent protein kinase inhibitor alpha	4.26683	7.36104	0.579651
ENSGALG00000045374	22	22:2619311-2621698:+1		2.48483	4.28804	0.57948
LOC107055587	.	.	ranBP2-like and GRIP domain-containing protein 3	0.880667	1.52038	0.579239
VCAM1	.	.	vascular cell adhesion molecule 1	20.2412	34.9758	0.578719
LOC776458	.	.	C-type lectin domain family 2 member D-like	6.4565	11.1617	0.578454
LOC107054452	.	.	atherin-like	1.39783	2.42088	0.577406
ENSGALG00000019063	1	1:182479610-182486231:+1		61.908	107.226	0.577362
PHACTR1	2	2:62437754-62509972:-1	phosphatase and actin regulator 1	3.0735	5.325	0.577183
C1QL2	7	7:28589901-28590859:+1	complement C1q like 2	1.01117	1.75258	0.57696
MAL	3	3:16102820-16107198:+1	myelin and lymphocyte protein	1.09767	1.90477	0.576273
ENSGALG00000036483	1	1:48102939-48103334:+1		1.07417	1.86404	0.576258
EOGT	12	12:15302691-15316402:-1	EGF domain-specific O-linked N-acetylglucosamine (GlcNAc) transferase	6.45033	11.2198	0.574908
MINPP1	6	6:9679455-9696260:-1	multiple inositol-polyphosphate phosphatase 1	12.2708	21.3444	0.574896
ENSGALG00000044523	3	3:8027458-8047827:-1		0.667167	1.16085	0.574724
FAP	7	7:21188928-21227006:+1	seprase	72.0785	125.5	0.574329
ENSGALG00000041283	KQ759647.1	KQ759647.1:6531-10871:+1		12.3875	21.5738	0.574191
FKBP12.6	3	3:104621983-104668401:+1	FK506 binding protein 1B	0.700833	1.22154	0.57373
SOX5	1	1:65938356-66226982:+1	SRY (sex determining region Y)-box 5	2.53367	4.41769	0.573527
PHOSPHO1	27	27:3628878-3630605:+1	phosphatase, orphan 1	8.40883	14.6672	0.573309
TM6SF1	10	10:11214442-11233484:+1	transmembrane 6 superfamily member 1	14.8215	25.8565	0.573221
LOC100857512	.	.	death-associated protein kinase 2-like	1.37517	2.39927	0.573161
FBXL13	1	1:12838227-12916687:-1	F-box and leucine-rich repeat protein 13	0.7875	1.37531	0.572599
ENSGALG00000017083	1	1:175241250-175277555:+1		0.673667	1.17662	0.572546
Pou5f3	17	17:950257-953061:-1	POU domain class 5 transcription factor 3 isoform 1	0.871333	1.524	0.571741
LY86	2	2:65108627-65132418:-1	lymphocyte antigen 86	952.626	1666.99	0.571465
ABCB11	7	7:18965845-19008073:+1	ATP-binding cassette, sub-family B (MDR/TAP), member 11	1.3815	2.41908	0.571086
FAM110D	23	23:3204812-3205849:-1	family with sequence similarity 110 member D	0.614333	1.076	0.570942
SNX10	2	2:32275230-32308776:+1	sorting nexin 10	897.825	1574.79	0.570123
MDFI	.	.	MyoD family inhibitor	5.35517	9.40873	0.56917
PRMT8	1	1:75168825-75220639:+1	protein arginine methyltransferase 8	0.7075	1.24427	0.568607
ENSGALG00000027536	3	3:54693252-54709177:+1		0.7765	1.36773	0.567729
HUNK	1	1:104732138-104786820:+1	hormonally up-regulated Neu-associated kinase	1.23167	2.16996	0.567598
CEMIP	10	10:12248442-12295841:-1	cell migration inducing protein, hyaluronan binding	6.23567	10.9868	0.567561
STXBP4	.	.	syntaxin binding protein 4	0.830333	1.46373	0.567272
GCOM1	.	.	GRINL1A complex locus 1	1.6125	2.84588	0.566608
LOC107050675	.	.	uncharacterized LOC107050675	1.40533	2.48127	0.566377
ENSGALG00000004509	19	19:6584989-6587790:+1	Polyubiquitin-B Ubiquitin	222.584	393.117	0.566202
COBLL1	7	7:20140771-20213740:+1	cordon-bleu WH2 repeat protein-like 1	3.94817	6.97419	0.566111
TP53TG5	.	.	TP53 target 5	0.830167	1.46673	0.565998
ITPR3	26	26:4622273-4659503:-1	inositol 1,4,5-trisphosphate receptor, type 3	4.2115	7.46596	0.564093
IL10	26	26:2562267-2564556:-1	interleukin 10	2.66967	4.73277	0.564081
SGCD	13	13:11524677-11645193:-1	sarcoglycan, delta (35kDa dystrophin-associated glycoprotein)	1.29233	2.29281	0.563647
TBC1D9	4	4:29945818-29988757:-1	TBC1 domain family, member 9 (with GRAM domain)	2.241	3.97746	0.563425
ENSGALG00000011805	4	4:52117096-52123995:-1		13.4472	23.951	0.561446
ZMYND12	21	21:6458891-6470750:+1	zinc finger, MYND-type containing 12	0.797833	1.42308	0.56064
JAM2	1	1:102510328-102543990:+1	junctional adhesion molecule 2	1.906	3.40273	0.560138
SDC4	20	20:5273295-5288746:+1	syndecan 4	199.982	357.336	0.559646
TMEM255B	1	1:137209990-137272589:-1	transmembrane protein 255B	0.684333	1.22312	0.5595
ENSGALG00000045580	3	3:23378026-23379976:+1		0.760333	1.35977	0.559164
SOD3	4	4:74158334-74159793:-1	superoxide dismutase 3	7.11633	12.7383	0.558658
CDH3	.	.	cadherin 3, type 1, P-cadherin (placental)	3.80383	6.80958	0.558601
ANPEP	10	10:19886093-20028017:-1	alanyl aminopeptidase, membrane	18.537	33.2112	0.558155
C5H14ORF159	.	.	chromosome 5 open reading frame, human C14orf159	2.4995	4.47823	0.558145
C14orf159	5	5:44254119-44275768:+1	chromosome 14 open reading frame 159	0.624667	1.11962	0.55793
ST3GAL6	1	1:84210321-84252641:+1	ST3 beta-galactoside alpha-2,3-sialyltransferase 6	48.9448	87.7294	0.557907
il-1beta	22	22:4616890-4618940:-1		81.5825	146.274	0.557738
AIFM2	6	6:11988592-11993397:+1	apoptosis inducing factor, mitochondria associated 2	8.85867	15.9624	0.554971
COL4A1	1	1:138793510-138903918:-1	collagen, type IV, alpha 1	16.6593	30.0272	0.554808
FGFR2	6	6:30907654-30979928:-1	fibroblast growth factor receptor 2	3.1725	5.71835	0.554793
MMP13	1	1:182444413-182451714:+1	matrix metallopeptidase 13	77.9673	140.543	0.554757
PANX3	24	24:304486-307744:-1	pannexin 3	3.16033	5.70219	0.554231
NRK	.	.	Nik related kinase	1.72183	3.11315	0.553083
SM1	.	.	slow myosin heavy chain 1	1.25133	2.26362	0.552803
LAMB3	26	26:3114635-3124587:-1	laminin, beta 3	0.792167	1.43319	0.552729
ENSGALG00000001475	23	23:3242123-3252831:+1	Stathmin	17.935	32.4725	0.552314
KIF11	6	6:20718576-20734605:-1	kinesin family member 11	2.9015	5.26123	0.551487
NR4A2	7	7:36220884-36228064:-1	nuclear receptor subfamily 4, group A, member 2	0.781167	1.41662	0.551432
ENSGALG00000034786	AADN04014122.1	AADN04014122.1:69-1289:-1		4.0395	7.32838	0.551213
LOC107056638	.	.	lupus La protein-like	4.0395	7.32838	0.551213
VIP	3	3:49646763-49653486:+1	vasoactive intestinal peptide	9.6775	17.5601	0.551108
TOM1L1	18	18:5886792-5907213:+1	target of myb1 like 1 membrane trafficking protein	1.691	3.08119	0.548814
ENSGALG00000041676	AADN04000849.1	AADN04000849.1:42122-45809:+1		1.127	2.05465	0.548511
HEY1	.	.	hes-related family bHLH transcription factor with YRPW motif 1	3.86217	7.04742	0.548025
FKBP5	26	26:67524-84823:-1	FK506 binding protein 5	8.23467	15.0448	0.547344
COL10A1	3	3:64174068-64180744:+1	collagen type X alpha 1 chain	1446.36	2644.2	0.546995
ENSGALG00000014071	1	1:67751004-67983940:-1		0.6515	1.19185	0.546631
IL1R2	1	1:133825648-133835138:+1	interleukin 1 receptor, type II	139.606	255.477	0.546451
SERTM1	1	1:172457844-172472421:-1	serine rich and transmembrane domain containing 1	2.8575	5.23346	0.546006
VWA1	21	21:2171724-2181323:-1	von Willebrand factor A domain containing 1	0.721333	1.32212	0.54559
HECW2	7	7:9831319-9937960:-1	HECT, C2 and WW domain containing E3 ubiquitin protein ligase 2	0.6645	1.21823	0.545463
LOC107050830	.	.	uncharacterized LOC107050830	1.39933	2.56696	0.545132
LOC107050755	.	.	pulmonary surfactant-associated protein B-like	0.592333	1.08688	0.544983
STON1	.	.	stonin 1	1.83633	3.37615	0.543913
PDZD2	.	.	PDZ domain containing 2	0.821	1.51054	0.543515
COL26A1	19	19:3498587-3653964:+1	collagen, type XXVI, alpha 1	0.573167	1.05469	0.543444
EDN1	2	2:62884522-62888112:-1	endothelin 1	1.4795	2.72273	0.543388
LOC428714	.	.	probable tRNA threonylcarbamoyladenosine biosynthesis protein YwlC-like	0.784833	1.44492	0.543166
PRIMA1	5	5:45350875-45393576:-1	proline rich membrane anchor 1	16.0908	29.6348	0.542971
LANCL3	1	1:113222082-113251614:-1	LanC like 3	0.874833	1.61127	0.542947
ENSGALG00000034416	AADN04000910.1	AADN04000910.1:15993-18272:-1		0.76	1.40181	0.542157
UNC5C	4	4:58980570-59219374:-1	unc-5 homolog C (C. elegans)	1.62833	3.00415	0.542027
LOC107055757	.	.	chromodomain-helicase-DNA-binding protein 4-like	0.607833	1.12231	0.541592
ENSGALG00000030329	AADN04012230.1	AADN04012230.1:21-1877:+1		0.7085	1.30831	0.541539
ENSGALG00000030673	5	5:50123820-50126256:+1		7.6125	14.0608	0.541398
SHISA9	.	.	shisa family member 9	2.292	4.23915	0.540674
PAM	Z	Z:50044582-50117715:-1	peptidylglycine alpha-amidating monooxygenase	35.5122	65.7034	0.540492
NPNT	4	4:38830535-38858198:-1	nephronectin	0.9885	1.83058	0.539994
BLK	3	3:107708021-107727966:+1	BLK proto-oncogene, Src family tyrosine kinase	9.96017	18.4592	0.539576
DRD3	1	1:82979190-82989119:+1	dopamine receptor D3	0.659167	1.223	0.538975
WHAMM	10	10:11085565-11097261:+1	WAS protein homolog associated with actin, golgi membranes and microtubules	0.63	1.16981	0.53855
LOC776799	.	.	NEDD4L	0.753	1.39858	0.538404
FOXO6	.	.	forkhead box O6	1.06333	1.97512	0.538365
ELF3	26	26:313618-317551:+1	E74 like ETS transcription factor 3	1.515	2.8165	0.537902
NEXN	8	8:18971362-18998959:-1	nexilin (F actin binding protein)	0.618333	1.15038	0.537501
PDXK	1	1:110069292-110113597:+1	pyridoxal kinase	142.583	265.305	0.537431
LOC770936	.	.	serine/threonine-protein kinase SRPK3-like	0.543167	1.01392	0.535708
STMN1	.	.	stathmin 1	12.5968	23.566	0.534533
ICA1	2	2:24981101-25052944:-1	islet cell autoantigen 1, 69kDa	1.75917	3.29369	0.534102
DTNA	2	2:107653915-107871854:+1	dystrobrevin, alpha	3.279	6.1545	0.532781
SORBS2	.	.	sorbin and SH3 domain containing 2	0.617167	1.16023	0.531934
SLC25A4	4	4:39636713-39639533:-1	solute carrier family 25 member 4	6.99317	13.1643	0.531222
LOC107049051	.	.	biogenesis of lysosome-related organelles complex 1 subunit 3-like	1.78033	3.35204	0.53112
NOV	2	2:136568798-136574085:+1	nephroblastoma overexpressed	1.06433	2.00462	0.530941
FAM189A2	Z	Z:34684202-34697214:+1	family with sequence similarity 189, member A2	2.63267	4.96115	0.530656
ENSGALG00000025945	Z	Z:9152980-9154028:+1		0.596667	1.12473	0.530497
HCK	20	20:10307594-10313413:+1	hemopoietic cell kinase	0.675	1.27431	0.529699
GPC4	4	4:3791474-3853513:-1	glypican 4	21.3533	40.3656	0.528999
WBSCR27	.	.	Williams Beuren syndrome chromosome region 27	1.2115	2.29019	0.528995
CPAMD8	28	28:4229272-4253848:+1	C3 and PZP-like, alpha-2-macroglobulin domain containing 8	1.11683	2.11631	0.527727
MFAP2	21	21:4407476-4411229:-1	microfibrillar associated protein 2	1.5165	2.87419	0.527626
RGS7BP	Z	Z:20155100-20189099:+1	regulator of G protein signaling 7 binding protein	8.7835	16.6567	0.527326
CYP2AC7	.	.	cytochrome P450, family 2, subfamily AC, polypeptide 7	1.88383	3.57315	0.527219
SLCO4C1	.	.	solute carrier organic anion transporter family, member 4C1	11.8822	22.5397	0.527167
EGFL7	17	17:8230689-8245326:-1	EGF like domain multiple 7	2.83533	5.37954	0.527059
PPP1R3C	6	6:19866561-19867520:-1	protein phosphatase 1, regulatory subunit 3C	1.658	3.14869	0.526568
ENSGALG00000044557	8	8:4359056-4373143:+1		4.24533	8.06469	0.52641
TNFSF4	.	.	tumor necrosis factor (ligand) superfamily, member 4	4.24533	8.06469	0.52641
ENSGALG00000032820	AADN04009644.1	AADN04009644.1:5336-6768:+1		0.704667	1.34	0.525871
TCF24	.	.	transcription factor 24	1.169	2.22338	0.525775
SORL1	24	24:3488615-3526611:-1	sortilin-related receptor	1.10033	2.09408	0.52545
ENSGALG00000008681	17	17:2234852-2252988:+1		0.848167	1.61473	0.525268
CDO1	Z	Z:72942623-72952484:+1	cysteine dioxygenase type 1	0.698833	1.33135	0.524907
SEMA3D	1	1:8310340-8452139:+1	semaphorin 3D	2.294	4.37035	0.524901
ENSGALG00000044919	5	5:50128497-50128922:+1		7.93683	15.1218	0.52486
ENG	17	17:5421141-5429875:+1	endoglin	8.42383	16.0547	0.524695
TGFBR1	.	.	transforming growth factor, beta receptor I (activin A receptor type II-like kinase, 53kDa)	4.07083	7.76165	0.52448
AK5	.	.	adenylate kinase 5	0.678333	1.29342	0.524448
ITM2C	9	9:5386985-5403209:-1	integral membrane protein 2C	0.5325	1.01546	0.524392
CAMKK1	19	19:3300492-3382167:+1	calcium/calmodulin-dependent protein kinase kinase 1, alpha	0.768333	1.46688	0.523786
CHIR-AB-487	.	.	immunoglobulin-like receptor	1.6715	3.19119	0.523785
PALM	28	28:2775252-2789996:+1	paralemmin	1.62433	3.10327	0.523426
LOC100858326	.	.	protein FAM163B-like	1.98183	3.78942	0.522991
FAM163B	17	17:7467178-7477348:-1	family with sequence similarity 163 member B	0.990833	1.89473	0.522941
LOC107049732	.	.	uncharacterized LOC107049732	28.268	54.1362	0.522164
CXCL14	13	13:15407661-15414929:+1	C-X-C motif chemokine ligand 14	20.7785	39.8076	0.521973
C8H1orf226	.	.	chromosome 8 open reading frame, human C1orf226	0.840333	1.61142	0.521485
SAPCD2	.	.	suppressor APC domain containing 2	4.15033	7.96415	0.521127
CHADL	1	1:49788795-49792401:+1	chondroadherin like	2.15967	4.15527	0.519742
SPON1	5	5:6396873-6557255:-1	Gallus gallus spondin 1, extracellular matrix protein (SPON1), mRNA.	3.45283	6.64908	0.519295
GREM1	5	5:30579487-30580185:-1	gremlin 1, DAN family BMP antagonist	9.94717	19.157	0.519244
DGAT2	1	1:194877499-194892393:-1	diacylglycerol O-acyltransferase 2	1.01817	1.96223	0.518882
FGFR3	4	4:83993011-84044572:-1	fibroblast growth factor receptor 3	5.60867	10.8242	0.51816
HAS2	2	2:137467301-137485205:-1	hyaluronan synthase 2	2.36617	4.56892	0.517883
PLEKHN1	21	21:2848494-2859631:-1	pleckstrin homology domain containing N1	2.70283	5.2195	0.517834
ENSGALG00000021355	Z	Z:9016408-9024018:+1		5.136	9.92119	0.51768
LOC101751846	.	.	meiotic recombination protein REC8 homolog	1.29367	2.50135	0.517188
LAMA5	.	.	laminin, alpha 5	1.587	3.06965	0.516996
LOC107057405	.	.	uncharacterized LOC107057405	0.9595	1.85592	0.516993
ENSGALG00000032524	AADN04007582.1	AADN04007582.1:4206-6488:-1		0.6685	1.29462	0.51637
MKI67	.	.	marker of proliferation Ki-67	5.3475	10.3621	0.516063
PLA2G4F	5	5:25553603-25573229:-1	phospholipase A2, group IVF	0.636333	1.23635	0.514689
FTD	5	5:12176613-12179659:+1		4.967	9.65069	0.514678
AQP9	10	10:7007996-7035035:-1	aquaporin 9	0.935667	1.81912	0.514353
LOC100859798	.	.	protein FAM134B-like	5.282	10.2728	0.514171
GPR132	5	5:52051670-52053242:-1	G protein-coupled receptor 132	2.24	4.36365	0.513331
SLC27A6	Z	Z:45636819-45675681:-1	solute carrier family 27 (fatty acid transporter), member 6	1.1005	2.14392	0.513311
ENSGALG00000031239	AADN04016278.1	AADN04016278.1:3009-4427:+1		4.18767	8.15885	0.513267
CFHR2	.	.	complement factor H-related 2	5.6875	11.0869	0.512992
ENSGALG00000002431	8	8:2661073-2693248:-1		5.6875	11.0869	0.512992
STAMBPL1	6	6:19221172-19231112:+1	STAM binding protein like 1	2.27767	4.44504	0.512407
KIAA1755	.	.	KIAA1755 ortholog	2.90383	5.67992	0.511245
ENSGALG00000038440	7	7:10227768-10237493:+1		2.7815	5.44481	0.510854
EVA1C	1	1:104968387-104988771:+1	eva-1 homolog C (C. elegans)	1.87733	3.67673	0.510599
LOC101750757	.	.	uncharacterized LOC101750757	1.75933	3.45088	0.509821
FAM110B	2	2:112260278-112261390:+1	family with sequence similarity 110 member B	2.67983	5.2615	0.509329
LOC107051296	.	.	free fatty acid receptor 2-like	0.647333	1.27315	0.508449
LOC100858282	.	.	C-type lectin domain family 2 member E-like	1.02967	2.02512	0.508448
JPH3	11	11:18097779-18138763:+1	junctophilin 3	4.15633	8.17565	0.508379
ENSGALG00000015577	Z	Z:64092962-64101313:+1		0.880833	1.73481	0.507741
LOC100859442	.	.	protein FAM151B-like	0.880833	1.73481	0.507741
ENSGALG00000037332	4	4:49474814-49502263:+1		7.19033	14.167	0.507541
GYPC	7	7:24152194-24178854:-1	glycophorin C (Gerbich blood group)	24.082	47.5051	0.506935
DUSP15	20	20:10270064-10277462:-1	dual specificity phosphatase 15	1.71017	3.38123	0.505782
SLC13A3	.	.	solute carrier family 13 (sodium-dependent dicarboxylate transporter), member 3	4.76533	9.42519	0.505595
LOC107050094	.	.	uncharacterized LOC107050094	3.92567	7.76473	0.505577
SEMA6D	10	10:9898756-9911145:+1	sema domain, transmembrane domain (TM), and cytoplasmic domain, (semaphorin) 6D	4.09767	8.10881	0.505335
UACA	.	.	uveal autoantigen with coiled-coil domains and ankyrin repeats	7.87183	15.5788	0.50529
BMPER	2	2:47688331-47834840:-1	BMP binding endothelial regulator	7.65283	15.1807	0.504116
C17orf67	18	18:6330246-6335894:-1	chromosome 17 open reading frame 67	6.28033	12.4733	0.503503
C18H17ORF67	.	.	chromosome 18 open reading frame, human C17orf67	6.28033	12.4733	0.503503
FAM181B	1	1:189045539-189046500:-1	family with sequence similarity 181, member B	0.517167	1.02765	0.50325
ENSGALG00000016670	3	3:107919467-107922012:-1		4.5525	9.05131	0.502966
PCOLCE2	9	9:10574023-10593642:-1	procollagen C-endopeptidase enhancer 2	38.381	76.4874	0.501795
SHROOM3	.	.	shroom family member 3	0.789833	1.57923	0.500138
IL1B	.	.	interleukin 1, beta	11.7743	23.5692	0.499565
ENSGALG00000035466	AADN04000639.1	AADN04000639.1:104169-125545:-1		0.927667	1.85723	0.499489
ENSGALG00000014751	Z	Z:20383073-20519927:-1		1.57167	3.14769	0.499308
SEC16B	8	8:6631529-6642933:+1	SEC16 homolog B (S. cerevisiae)	0.640667	1.28327	0.499246
KIF25	3	3:42197887-42223817:-1	kinesin family member 25	1.06133	2.12735	0.4989
ENSGALG00000045728	AADN04007016.1	AADN04007016.1:2509-3958:-1		0.889167	1.78538	0.498025
ENSGALG00000045739	14	14:1581304-1589233:-1		1.1535	2.31738	0.497759
ATP2B2	12	12:3752214-4001595:+1	ATPase plasma membrane Ca2+ transporting 2	0.918167	1.84896	0.496585
ENSGALG00000046405	AADN04002495.1	AADN04002495.1:14324-17609:+1		0.922333	1.85769	0.496494
ADAM22	2	2:20936305-21002401:+1	ADAM metallopeptidase domain 22	2.53433	5.1115	0.49581
PHGDH	8	8:4264703-4268005:-1	phosphoglycerate dehydrogenase	9.04317	18.2502	0.495512
RNF2	8	8:8057403-8073540:+1	ring finger protein 2	0.709333	1.43177	0.495424
ENSGALG00000034219	16	16:544838-551915:-1		0.506667	1.02546	0.494086
APOA1	24	24:5110448-5112102:-1	apolipoprotein A1	97.3995	197.21	0.493886
SCARA5	3	3:105581245-105594207:+1	scavenger receptor class A, member 5 (putative)	1.5105	3.05985	0.493652
UGP2	3	3:9554804-9577969:+1	UDP-glucose pyrophosphorylase 2	94.9153	192.525	0.493002
MME	9	9:23162941-23198332:-1	membrane metalloendopeptidase	0.6155	1.25015	0.492339
LOC417386	.	.	pyrroline-5-carboxylate reductase 2-like	1.3235	2.69062	0.491895
ENSGALG00000036871	8	8:3842495-3871870:-1		0.893833	1.82042	0.491003
GM2A	.	.	GM2 ganglioside activator	12.1915	24.8755	0.490101
CENPV	.	.	centromere protein V	1.43817	2.937	0.489672
SLC38A3	12	12:3203801-3209305:-1	solute carrier family 38 member 3	3.33067	6.81127	0.488994
ENSGALG00000035354	KQ759661.1	KQ759661.1:21-10191:-1		4.55117	9.34727	0.486898
LOC107049909	.	.	leukocyte immunoglobulin-like receptor subfamily A member 2	9.46867	19.4674	0.486385
DHRS3	21	21:5313102-5342428:+1	dehydrogenase/reductase 3	5.07583	10.4828	0.484206
FAM81A	10	10:6654750-6665773:-1	family with sequence similarity 81, member A	0.558	1.15404	0.483519
A4GALT	1	1:68397254-68409951:-1	alpha 1,4-galactosyltransferase (P blood group)	0.569	1.17708	0.483401
ECM2	12	12:3356580-3369207:+1	extracellular matrix protein 2	6.90133	14.2803	0.483278
WNT16	1	1:23246190-23256408:-1	Wnt family member 16	0.560667	1.16573	0.480957
ENSGALG00000021450	11	11:1108934-1128649:-1		0.481667	1.00188	0.480761
LOC100859097	.	.	piwi-like protein 2-like	0.804167	1.67504	0.480088
LRP4	5	5:23347084-23385831:+1	low density lipoprotein receptor-related protein 4	0.58	1.20923	0.479644
LOC101752219	.	.	sodium/potassium ATPase inhibitor SPAI-2-like	57.9315	120.823	0.479473
MYL1	7	7:2770680-2788461:-1	myosin light chain 1	1.01217	2.11146	0.479368
EMID1	.	.	EMI domain containing 1	1.52833	3.189	0.479252
ENSGALG00000038191	3	3:105207853-105215120:-1		0.613	1.28115	0.478475
ENSGALG00000038840	33	33:596319-596636:-1		5.30183	11.086	0.478247
STEAP2	2	2:21695262-21701570:+1	STEAP2 metalloreductase	3.65583	7.65854	0.477354
FAM26F	3	3:64018364-64020812:-1	family with sequence similarity 26 member F	1.29567	2.72008	0.476335
ENSGALG00000017204	1	1:185466218-185503920:+1		2.318	4.8825	0.474757
SESN3	.	.	sestrin 3	4.63567	9.76519	0.474713
HS6ST2	4	4:3612123-3713509:-1	Heparan-sulfate 6-O-sulfotransferase 2	2.80567	5.91927	0.473989
MAT1A	6	6:4436646-4453363:+1	methionine adenosyltransferase 1A	1.87867	3.96892	0.473344
ENSGALG00000015183	2	2:106851537-106876449:-1		88.208	186.535	0.472876
ENSGALG00000026613	25	25:1872862-1873615:+1		269.132	569.224	0.472806
FNDC5	23	23:5294114-5304982:-1	fibronectin type III domain containing 5	3.75667	7.94858	0.472621
ENSGALG00000044173	AADN04000628.1	AADN04000628.1:5224-6939:-1		1.90767	4.04877	0.471172
ENSGALG00000044365	AADN04001097.1	AADN04001097.1:5909-7624:+1		1.90767	4.04877	0.471172
LOC107049264	.	.	endogenous retrovirus group K member 8 Gag polyprotein-like	1.90767	4.04877	0.471172
LOC100859854	.	.	T-cell-interacting, activating receptor on myeloid cells protein 1-like	2.9245	6.20869	0.471033
CACNA2D2	12	12:1481230-1608215:-1	calcium channel, voltage-dependent, alpha 2/delta subunit 2	0.685333	1.45788	0.470087
LOC776275	.	.	UPF0444 transmembrane protein C12orf23 homolog	0.662167	1.40962	0.46975
ENSGALG00000028238	6	6:23565911-23569213:+1		0.6545	1.3935	0.469681
ENSGALG00000009328	6	6:30000752-30026081:-1		0.8715	1.85758	0.46916
ENSGALG00000030886	17	17:999174-1001420:-1		6.59533	14.0647	0.468928
CYBRD1	7	7:18094028-18102411:-1	cytochrome b reductase 1	5.7745	12.323	0.468597
ENSGALG00000037599	25	25:1868937-1871234:+1		13.7742	29.4592	0.467568
S100B	7	7:6920734-6923751:+1	S100 calcium binding protein B	0.743833	1.59396	0.466657
ENSGALG00000033420	AADN04000745.1	AADN04000745.1:21-5551:-1		75.7908	162.776	0.465614
SMIM5	18	18:4846231-4857284:-1	small integral membrane protein 5	1.35433	2.91512	0.46459
PTPRK	3	3:58821365-59132416:+1	protein tyrosine phosphatase, receptor type, K	0.709833	1.53177	0.463407
STC2	13	13:9230034-9239581:-1	stanniocalcin 2	9.9795	21.6293	0.461388
COL24A1	.	.	collagen, type XXIV, alpha 1	0.6585	1.42846	0.460985
ENSGALG00000044922	AADN04006260.1	AADN04006260.1:5298-6591:+1		1.7595	3.82158	0.460412
B3GNT7	9	9:15318557-15320500:+1	UDP-GlcNAc:betaGal beta-1,3-N-acetylglucosaminyltransferase 7	0.7675	1.66888	0.459888
LOC101748955	.	.	uncharacterized LOC101748955	1.53233	3.33365	0.459656
SUSD4	3	3:17813559-17842946:+1	sushi domain containing 4	0.952	2.07231	0.459391
APCDD1L	20	20:11368023-11381833:+1	APC down-regulated 1 like	0.723	1.57562	0.458868
PXYLP1	9	9:6796763-6897692:+1	2-phosphoxylose phosphatase 1	5.03	10.9622	0.458848
ZPLD1	1	1:85567535-85586457:+1	zona pellucida-like domain containing 1	5.525	12.0641	0.45797
S100A8	25	25:1885186-1886619:+1	S100 calcium binding protein A8	53.1253	116.05	0.457781
NPY	2	2:31521047-31529071:+1	neuropeptide Y	1.37083	2.995	0.457707
ARMC9	9	9:15252365-15303505:+1	armadillo repeat containing 9	4.05633	8.86715	0.457456
ENSGALG00000030377	26	26:4904776-4905638:+1		1.51267	3.31188	0.456739
ENSGALG00000012787	2	2:64587752-64609767:-1		1.771	3.88958	0.455319
LACC1	.	.	laccase (multicopper oxidoreductase) domain containing 1	3.04583	6.69588	0.454881
TMEM61	8	8:25348716-25353446:+1	transmembrane protein 61	5.2115	11.4808	0.45393
LPAR4	4	4:1409332-1423642:+1	lysophosphatidic acid receptor 4	4.12967	9.10523	0.453549
PRODH	.	.	proline dehydrogenase (oxidase) 1	4.44983	9.81338	0.453445
LOC107056412	.	.	membrane-spanning 4-domains subfamily A member 12-like	5.04083	11.1177	0.453408
ADTRP	2	2:63095842-63126232:+1	androgen-dependent TFPI-regulating protein	3.9565	8.74246	0.452561
RSAD2	3	3:95406461-95415464:+1	radical S-adenosyl methionine domain containing 2	1.674	3.70104	0.452305
ENSGALG00000045151	13	13:8417320-8420341:-1		0.5395	1.19292	0.45225
TRPV4	15	15:6894024-6899794:-1	transient receptor potential cation channel subfamily V member 4	0.771833	1.71723	0.449464
ENSGALG00000010963	4	4:46023967-46028293:+1		0.759	1.69173	0.448653
ENSGALG00000046341	AADN04005084.1	AADN04005084.1:11536-13240:-1		1.3975	3.11627	0.448453
TGM4	2	2:43317611-43328122:-1	transglutaminase 4	1.84067	4.10573	0.448316
PRKG2	4	4:45935473-45954816:+1	protein kinase, cGMP-dependent, type II	4.663	10.4135	0.447784
LOC100858414	.	.	testican-2-like	2.028	4.54669	0.446039
MLKL	11	11:1946273-1950045:-1	mixed lineage kinase domain-like	3.22267	7.22658	0.445946
ENSGALG00000045419	AADN04009120.1	AADN04009120.1:6720-7921:-1		0.453833	1.02196	0.444081
LOC107057466	.	.	sperm-associated antigen 4 protein-like	0.5485	1.23892	0.442723
GBP7	.	.	guanylate binding protein 7	1.466	3.32162	0.441352
ENSGALG00000030089	AADN04021034.1	AADN04021034.1:1145-2108:-1		1.031	2.33754	0.441062
ENSGALG00000030712	AADN04000776.1	AADN04000776.1:11-7373:+1		90.7992	206.076	0.44061
LOC427594	.	.	2-epi-5-epi-valiolone synthase-like	0.8455	1.92038	0.440276
PRR16	Z	Z:71195874-71300629:-1	proline rich 16	0.618167	1.4065	0.439507
LOC107057349	.	.	ER membrane protein complex subunit 1-like	1.01117	2.30323	0.439021
ENSGALG00000034568	KQ759443.1	KQ759443.1:15440-27148:-1		3.99633	9.10677	0.438831
BEAN1	11	11:11619893-11657333:-1	brain expressed associated with NEDD4 1	1.27867	2.92608	0.43699
SH3YL1	3	3:92246030-92274846:-1	SH3 and SYLF domain containing 1	0.868833	1.98888	0.436845
ENSGALG00000013091	1	1:63005065-63019412:-1		1.09917	2.51658	0.436771
ADAMTS19	Z	Z:45324844-45485330:-1	ADAM metallopeptidase with thrombospondin type 1 motif, 19	0.436167	1.00204	0.435279
TFPI2	2	2:23330575-23335279:-1	tissue factor pathway inhibitor 2	13.3752	30.7524	0.434931
ENSGALG00000026768	Z	Z:50223340-50282675:+1		5.35517	12.3459	0.43376
ADGRD1	15	15:3066200-3191098:-1	adhesion G protein-coupled receptor D1	0.474333	1.09369	0.433699
SBSPON	2	2:118074519-118085414:-1	somatomedin B and thrombospondin type 1 domain containing	2.57667	5.95931	0.432377
SLAMF1	.	.	signaling lymphocytic activation molecule family member 1	1.04683	2.42127	0.432349
LTBP2	5	5:37973837-38033648:-1	latent transforming growth factor beta binding protein 2	1.80517	4.18081	0.431775
NGFR	27	27:3423153-3434589:-1	Tumor necrosis factor receptor superfamily member 16	1.81767	4.21292	0.43145
ENPP3	3	3:57434063-57467478:-1	ectonucleotide pyrophosphatase/phosphodiesterase 3	2.38017	5.52638	0.430691
ENSGALG00000007728	15	15:10154963-10165658:-1		8.80233	20.4486	0.430461
ENSGALG00000030700	AADN04000910.1	AADN04000910.1:33288-35381:-1		3.593	8.34692	0.430458
SHISA2	1	1:177058130-177061984:-1	shisa family member 2	0.5995	1.39396	0.430069
ENSGALG00000037109	3	3:57585333-57609756:-1		2.54483	5.92854	0.429251
LOC100858919	.	.	receptor-type tyrosine-protein phosphatase S-like	14.2323	33.1873	0.428849
LOC100859694	.	.	outer dense fiber protein 3-like	0.688	1.61242	0.426687
LRAT	4	4:20559675-20561135:+1	lecithin retinol acyltransferase (phosphatidylcholine--retinol O-acyltransferase)	3.995	9.412	0.424458
NGEF	9	9:1052566-1088975:-1	neuronal guanine nucleotide exchange factor	1.4965	3.52788	0.424192
ENSGALG00000007418	24	24:5457626-5460103:-1		0.7325	1.73588	0.421975
NRCAM	1	1:28579093-28718391:+1	neuronal cell adhesion molecule	0.632333	1.5025	0.420854
ENSGALG00000005194	Z	Z:9056706-9060302:-1	CD72 molecule	0.531	1.2655	0.419597
SLC44A3	8	8:13463306-13555349:-1	solute carrier family 44, member 3	0.753833	1.79977	0.41885
LOC100858953	.	.	uncharacterized LOC100858953	0.492667	1.17888	0.417909
ENSGALG00000003690	27	27:5042180-5052819:-1	keratin, type I cytoskeletal 14	0.795167	1.90496	0.417419
CNGA1	4	4:67010756-67015296:+1	cyclic nucleotide gated channel alpha 1	0.6655	1.59554	0.417101
TRANK1	.	.	tetratricopeptide repeat and ankyrin repeat containing 1	4.7265	11.3474	0.416528
PAPSS2	6	6:9643792-9663329:-1	3'-phosphoadenosine 5'-phosphosulfate synthase 2	4.56183	10.9556	0.416394
GAL3ST1	15	15:10854317-10857168:+1	galactose-3-O-sulfotransferase 1	0.554667	1.33912	0.414204
BMP6	.	.	bone morphogenetic protein 6	2.53833	6.13381	0.413827
ENSGALG00000000249	27	27:1787645-1791152:-1	Somatotropin	15.5407	37.5656	0.413694
ENSGALG00000029684	AADN04015694.1	AADN04015694.1:71-5337:-1		1.5455	3.73612	0.413665
RET	6	6:4809011-4885036:-1	ret proto-oncogene	0.433667	1.05042	0.41285
FST	Z	Z:16072649-16079246:+1	follistatin	4.84883	11.7498	0.412675
OLFM4	1	1:165561980-165586181:-1	olfactomedin 4	0.431833	1.04815	0.411994
ENSGALG00000034967	1	1:195016711-195176210:-1		1.4325	3.47973	0.41167
ENSGALG00000039696	17	17:892629-900397:+1		1.105	2.68419	0.411669
LAMA4	3	3:65864380-65965590:+1	laminin, alpha 4	1.25983	3.062	0.411441
ROPN1L	.	.	rhophilin associated tail protein 1-like	1.16483	2.83715	0.410564
PCTP	18	18:6095734-6104125:+1	phosphatidylcholine transfer protein	2.08567	5.08015	0.410552
FZD9	19	19:264594-266693:-1	frizzled class receptor 9	2.6205	6.41308	0.408618
ENSGALG00000043815	1	1:192251603-192251839:+1		0.454167	1.11569	0.407072
SYNDIG1	3	3:15719395-15767957:+1	synapse differentiation inducing 1	0.787333	1.93581	0.406721
LOC425878	.	.	leukocyte immunoglobulin-like receptor subfamily A member 2-like	4.837	11.9276	0.405531
LOC107050698	.	.	DNA-directed RNA polymerase II subunit rpb1-like	1.21033	2.98735	0.405153
ENSGALG00000016651	3	3:107634880-107643339:+1		0.492833	1.21704	0.404945
TDH	.	.	L-threonine dehydrogenase (pseudogene)	1.4785	3.65123	0.404932
H2A-VI	1	1:48199800-48200189:+1	Histone H2A-IV	0.548833	1.35877	0.403919
BAALC	2	2:129934284-129955820:+1	brain and acute leukemia, cytoplasmic	1.5165	3.76096	0.403221
C11orf52	24	24:6200315-6206582:-1	chromosome 24 open reading frame, human C11orf52	3.00317	7.46854	0.402109
LOC107055769	.	.	sestrin-3-like	4.49683	11.2156	0.400944
LOC107052104	.	.	leucine-rich repeat-containing protein 32-like	0.8455	2.11085	0.40055
COL9A1	3	3:83104826-83171007:+1	collagen, type IX, alpha 1	22.7405	56.9789	0.399104
GIF	AADN04000990.1	AADN04000990.1:9258-14113:-1	gastric intrinsic factor	0.481167	1.20708	0.398621
ENSGALG00000042670	AADN04006861.1	AADN04006861.1:3148-3762:+1		0.9275	2.327	0.398582
MLPH	7	7:4777561-4795271:-1	melanophilin	0.576333	1.44627	0.398497
SLC39A8	4	4:61121025-61141216:-1	solute carrier family 39 (zinc transporter), member 8	2.90533	7.30265	0.397846
RAPGEF4	7	7:17506100-17667800:-1	Rap guanine nucleotide exchange factor (GEF) 4	4.02783	10.1247	0.397821
STEAP4	2	2:21036209-21042939:-1	STEAP4 metalloreductase	56.5942	142.541	0.397038
HPS5	.	.	Hermansky-Pudlak syndrome 5	1414.13	3573.76	0.395698
FAM101B	.	.	family with sequence similarity 101, member B	2.59267	6.56042	0.395198
COL22A1	2	2:144646756-144875068:-1	collagen, type XXII, alpha 1	1.536	3.89854	0.393994
ENSGALG00000004445	20	20:5726465-5727314:-1		2.96517	7.54038	0.393238
ENPP1	.	.	ectonucleotide pyrophosphatase/phosphodiesterase 1	0.592833	1.50896	0.392875
COL11A1	.	.	collagen, type XI, alpha 1	38.1063	97.3702	0.391355
ENSGALG00000027716	5	5:12488069-12489867:-1		1382.73	3541.97	0.390385
LOC107051216	.	.	immunoglobulin superfamily member 1-like	1.601	4.11481	0.389083
ALDOB	Z	Z:65124989-65133725:+1	aldolase, fructose-bisphosphate B	4.18867	10.7801	0.388555
ARSI	13	13:13183770-13186780:+1	arylsulfatase family member I	7.59367	19.5834	0.38776
FEZ1	24	24:124425-134392:+1	fasciculation and elongation protein zeta 1	1.29667	3.35292	0.386727
CHGA	5	5:44953316-44963482:+1	chromogranin A	6.59483	17.0577	0.386619
SLC1A6	28	28:682646-704983:-1	solute carrier family 1 (high affinity aspartate/glutamate transporter), member 6	4.03833	10.4802	0.385331
ENSGALG00000039585	2	2:148501300-148505443:-1		0.5425	1.41004	0.384741
CPA2	.	.	carboxypeptidase A2 (pancreatic)	1.09767	2.85569	0.384378
ST3GAL5	.	.	ST3 beta-galactoside alpha-2,3-sialyltransferase 5	1.86783	4.86735	0.383748
ENSGALG00000030380	AADN04000612.1	AADN04000612.1:98789-99811:-1		51.2347	133.845	0.38279
CORO2A	Z	Z:70482714-70527115:-1	coronin, actin binding protein, 2A	1.13733	2.97927	0.381749
CLEC3A	11	11:14241342-14248273:+1	C-type lectin domain family 3 member A	16.6855	43.8525	0.380492
ENSGALG00000044955	AADN04002399.1	AADN04002399.1:10417-11599:+1		2.29167	6.03696	0.379606
AC025263.3	.	.	Uncharacterized protein	0.863167	2.28512	0.377734
COL9A3	20	20:8532484-8564351:+1	collagen type IX alpha 3 chain	31.757	84.1622	0.377331
COMP	28	28:3800421-3815388:+1	cartilage oligomeric matrix protein	3.51833	9.34604	0.376452
ENSGALG00000029547	AADN04001512.1	AADN04001512.1:3912-18932:+1		5.0535	13.4322	0.376224
ENSGALG00000046020	AADN04008550.1	AADN04008550.1:3361-5320:+1		1.06167	2.828	0.375413
EDA	4	4:1150672-1204662:+1	ectodysplasin A	4.1485	11.0656	0.374901
TMEM163	7	7:30493231-30574013:-1	transmembrane protein 163	0.467667	1.2485	0.374583
LOC423229	.	.	cytosolic phospholipase A2 epsilon-like	0.442333	1.18927	0.371937
LOC420721	.	.	sushi domain-containing protein 5-like	3.25033	8.76669	0.370759
SUSD5	2	2:44661561-44704132:-1	sushi domain containing 5	3.25033	8.76669	0.370759
GABRA4	4	4:67356760-67392287:+1	gamma-aminobutyric acid (GABA) A receptor, alpha 4	0.480167	1.30465	0.368041
EXTL1	23	23:3229056-3234549:-1	exostosin like glycosyltransferase 1	0.852667	2.32723	0.366387
RFLNB	19	19:7001094-7003223:+1	refilin B	0.428333	1.16938	0.36629
C1QTNF8	14	14:5617810-5620433:+1	C1q and tumor necrosis factor related protein 8	0.545667	1.49304	0.365474
WISP2	20	20:5488264-5491556:-1	WNT1 inducible signaling pathway protein 2	0.381333	1.04569	0.364671
LOC101747958	.	.	uncharacterized LOC101747958	1.23183	3.37838	0.364622
ENSGALG00000030967	AADN04001776.1	AADN04001776.1:5688-14714:-1		16.1722	44.3745	0.364447
FBXL2	2	2:44747028-44782767:+1	F-box and leucine-rich repeat protein 2	4.33017	11.8955	0.364017
CHIR-IG1-5	AADN04000910.1	AADN04000910.1:11479-14128:+1	Gallus gallus immunoglobulin-like receptor CHIR-AB1-like (CHIR-IG1-5), mRNA.	4.56167	12.5929	0.36224
RASL11B	4	4:66369835-66373520:-1	RAS like family 11 member B	0.471667	1.30281	0.362039
LOC100859367	.	.	exostosin-1b-like	0.852667	2.36196	0.360999
LOC430731	.	.	zinc finger protein 226-like	0.392333	1.08731	0.36083
ENSGALG00000011532	7	7:23778486-23795514:+1		0.6995	1.9455	0.359548
ENSGALG00000038123	AADN04001947.1	AADN04001947.1:2993-19939:+1		0.6995	1.9455	0.359548
CHAD	18	18:10445470-10453126:+1	chondroadherin	19.5283	54.3704	0.359172
ENSGALG00000003137	15	15:4781351-4792186:-1		0.563	1.56838	0.358968
FAM101A	.	.	family with sequence similarity 101, member A	0.563	1.56838	0.358968
LOC100857570	.	.	T-cell-interacting, activating receptor on myeloid cells protein 1-like	0.868167	2.42123	0.358564
LOC107055540	.	.	uncharacterized LOC107055540	2.34967	6.57773	0.357215
PLIN1	10	10:12822224-12826841:+1	perilipin 1	0.498667	1.39658	0.357064
TNFRSF25	.	.	tumor necrosis factor receptor superfamily, member 25	0.982667	2.75638	0.356506
ENSGALG00000032272	1	1:48099163-48099621:+1		0.7045	1.98885	0.354225
ENSGALG00000035445	1	1:48102824-48103259:-1		0.7045	1.98885	0.354225
HIST1H4D	.	.	histone cluster 1, H4d	0.7045	1.98885	0.354225
CYP27C1	.	.	cytochrome P450, family 27, subfamily C, polypeptide 1	1.002	2.82992	0.354073
LOC107056595	.	.	cytochrome P450 27C1-like	1.002	2.82992	0.354073
LOC107051179	.	.	collagen alpha-2(XI) chain-like	39.7335	112.285	0.353863
CD3E	24	24:5450666-5455569:+1	CD3e molecule, epsilon (CD3-TCR complex)	0.376833	1.06492	0.35386
BTBD19	8	8:20861919-20867316:+1	BTB (POZ) domain containing 19	1.44983	4.10931	0.352817
H2B-VIII	1	1:48111297-48111790:+1	Histone H2B 8	1.2755	3.62404	0.351955
FNDC1	3	3:45927228-45991940:-1	fibronectin type III domain containing 1	0.4555	1.30088	0.350146
ENSGALG00000019845	3	3:107891531-107894588:+1	Gallinacin-9	2.76783	7.93323	0.348891
LOC101751434	.	.	all-trans-retinol 13,14-reductase-like	0.383667	1.10335	0.34773
COCH	5	5:34263828-34280520:+1	cochlin	31.8327	91.6999	0.34714
LOC107049143	.	.	C-type lectin domain family 2 member I-like	1.77333	5.14962	0.344362
COL9A2	23	23:4887092-4897385:-1	collagen type IX alpha 2 chain	12.5812	36.7557	0.342291
LOC107049819	.	.	leukocyte immunoglobulin-like receptor subfamily B member 3	2.17283	6.40888	0.339035
ENSGALG00000038726	AADN04012218.1	AADN04012218.1:5623-5962:-1		0.387667	1.14735	0.337881
LOC107055574	.	.	platelet glycoprotein 4-like	4.68317	13.9714	0.335197
LOC100857302	.	.	T-cell-interacting, activating receptor on myeloid cells protein 1-like	0.455	1.36069	0.334389
CNMD	1	1:165707166-165718950:+1	chondromodulin	28.4885	85.6577	0.332585
F13A1	2	2:65247235-65305803:+1	coagulation factor XIII A chain	51.0683	154.197	0.331189
ENSGALG00000035671	AADN04012479.1	AADN04012479.1:21-7205:+1		1.05583	3.20269	0.329671
Enpp2	2	2:136612721-136668116:-1	ectonucleotide pyrophosphatase/phosphodiesterase 2	1.58883	4.82912	0.329011
ENSGALG00000046136	AADN04009180.1	AADN04009180.1:4841-6105:-1		0.541167	1.65342	0.327301
ENSGALG00000041228	8	8:21098127-21099524:-1		1.77	5.40877	0.327246
RGCC	1	1:165953711-165963304:+1	regulator of cell cycle	5.13383	15.7879	0.325175
ENSGALG00000029209	AADN04000790.1	AADN04000790.1:33391-34819:-1		2.543	7.82369	0.325038
ENSGALG00000038656	AADN04000814.1	AADN04000814.1:15162-41970:+1		1.29183	3.98738	0.32398
DNASE1L3	12	12:8934103-8937705:-1	deoxyribonuclease 1 like 3	1.8295	5.66127	0.323161
ENSGALG00000032405	AADN04000661.1	AADN04000661.1:61202-67038:-1		0.360667	1.11608	0.323156
SEMA3A	1	1:8824964-8995709:+1	sema domain, immunoglobulin domain (Ig), short basic domain, secreted, (semaphorin) 3A	1.40567	4.36008	0.322395
ENSGALG00000044041	AADN04001394.1	AADN04001394.1:10155-11243:-1		0.712833	2.21127	0.322364
IGFBP2	7	7:23382780-23435025:-1	insulin-like growth factor binding protein 2, 36kDa	11.7125	36.4831	0.321039
LOC100858713	.	.	thiamine transporter 2-like	0.3515	1.09812	0.320094
LOC100858647	.	.	beta-microseminoprotein-like	2.7985	8.74327	0.320075
LSAMP	1	1:81944958-82236106:+1	Limbic system-associated membrane protein	1.34933	4.23385	0.318702
SOX9	18	18:8866456-8869366:+1	SRY-box 9	4.81783	15.1254	0.318526
HAPLN1	.	.	hyaluronan and proteoglycan link protein 1	9.83967	30.9264	0.318164
ENSGALG00000015627	Z	Z:62521046-62613868:+1	Hyaluronan and proteoglycan link protein 1	4.91983	15.4632	0.318163
PLPPR1	Z	Z:65137559-65264849:-1	phospholipid phosphatase related 1	0.8355	2.6265	0.318104
C6orf58	3	3:59239901-59251787:-1	chromosome 6 open reading frame 58	0.903667	2.86412	0.315513
ENSGALG00000045139	AADN04003351.1	AADN04003351.1:8467-9888:-1		0.4405	1.39723	0.315266
WFIKKN2	18	18:10189967-10193843:-1	WAP, follistatin/kazal, immunoglobulin, kunitz and netrin domain containing 2	0.6045	1.92369	0.314239
TMEM47	1	1:113937248-113961367:+1	transmembrane protein 47	1.88333	6.03365	0.312138
DGKI	1	1:57491613-57698081:+1	diacylglycerol kinase, iota	0.453833	1.45419	0.312086
ENSGALG00000043435	AADN04000612.1	AADN04000612.1:7-3871:-1		0.347667	1.11654	0.311379
MATN1	23	23:245720-262706:-1	matrilin 1, cartilage matrix protein	50.2777	161.536	0.311247
ENSGALG00000008888	4	4:16915775-17249012:+1		0.5985	1.93285	0.309647
ENSGALG00000046556	AADN04003073.1	AADN04003073.1:11556-13706:+1		1.18733	3.85223	0.30822
ENSGALG00000023472	11	11:18990707-18992936:-1		4.60183	14.9422	0.307975
FAM129A	8	8:7976895-8037147:-1	family with sequence similarity 129, member A	2.92083	9.57712	0.30498
ALDH1L2	1	1:54341803-54369311:+1	aldehyde dehydrogenase 1 family, member L2	0.562167	1.85242	0.303476
LOC425531	.	.	ras-related protein Rab-18-B-like	5.2405	17.2735	0.303383
ENSGALG00000040434	27	27:3486934-3491821:-1		1.841	6.06977	0.303306
PCP4	1	1:108164030-108196164:+1	Purkinje cell protein 4	1.4645	4.89146	0.299399
FABP4	2	2:121975264-121978486:-1	fatty acid binding protein 4	143.669	481.66	0.298279
LPPR5	.	.	lipid phosphate phosphatase-related protein type 5	0.324333	1.0975	0.29552
CYTL1	4	4:79471991-79474709:-1	cytokine like 1	5.87583	19.9494	0.294537
ENSGALG00000046648	AADN04001137.1	AADN04001137.1:11509-12906:+1		0.437167	1.48804	0.293787
ENSGALG00000007526	4	4:11347258-11351079:-1		1.19517	4.06958	0.293683
LOC422305	.	.	ES1 protein homolog, mitochondrial-like	1.19517	4.06958	0.293683
EPYC	1	1:43925156-43947733:-1	epiphycan	0.414833	1.41296	0.293591
PADI3	21	21:150867-156826:-1		0.677833	2.30946	0.293503
LOC419322	.	.	uncharacterized LOC419322	0.9015	3.08027	0.292669
CD9	1	1:74491375-74515119:+1	CD9 molecule	5.72633	19.7767	0.28955
ARHGEF33	3	3:16592567-16613165:+1	Rho guanine nucleotide exchange factor (GEF) 33	1.41717	4.91612	0.28827
TESC	15	15:11411293-11414048:+1	tescalcin	0.9735	3.37969	0.288044
DMD	1	1:114486908-115483002:+1	dystrophin	0.3945	1.39085	0.28364
CD79B	27	27:1793526-1797961:-1	CD79b molecule	9.2825	32.978	0.281476
LOC101749030	.	.	leukocyte immunoglobulin-like receptor subfamily A member 2-like	3.9845	14.173	0.281132
LOC415852	.	.	sulfotransferase family cytosolic 2B member 1-like	3.74567	13.3306	0.280982
BRICD5	.	.	BRICHOS domain containing 5	0.4825	1.74342	0.276754
ENSGALG00000011172	7	7:22044196-22098483:-1		0.3405	1.24608	0.273258
ENSGALG00000022815	3	3:107914855-107917298:-1	Gallinacin-1	13.8265	50.701	0.272707
ENSGALG00000035691	AADN04007092.1	AADN04007092.1:4529-5955:-1		0.5845	2.15685	0.270998
HPGD	4	4:44051784-44077636:-1	hydroxyprostaglandin dehydrogenase 15-(NAD)	1.43867	5.31669	0.270594
ACAN	10	10:13047888-13091063:-1	aggrecan	29.1698	109.427	0.26657
LOC101751308	.	.	uncharacterized LOC101751308	0.577333	2.17008	0.266043
ENSGALG00000046112	AADN04004495.1	AADN04004495.1:2967-3482:+1		0.3325	1.27096	0.261613
ENSGALG00000006453	9	9:4590500-4601249:-1		491.193	1883.26	0.260821
ENSGALG00000026899	Z	Z:45139013-45283428:-1		0.2595	1.00962	0.257029
ENSGALG00000042023	AADN04000814.1	AADN04000814.1:22708-25722:-1		17.7087	69.0035	0.256634
SLC22A16	3	3:66681777-66712311:+1	solute carrier family 22 member 16	0.8535	3.34369	0.255257
DGKA	33	33:607459-612722:+1	diacylglycerol kinase alpha	0.254667	1.01204	0.251637
TNIP3	4	4:54501619-54521075:+1	TNFAIP3 interacting protein 3	2.5295	10.0882	0.250739
ENSGALG00000032483	AADN04000861.1	AADN04000861.1:6888-18744:+1		0.640833	2.56981	0.24937
ENSGALG00000029532	4	4:35249909-35251574:-1		1.02217	4.11765	0.24824
ENSGALG00000014258	4	4:68881857-68944854:-1		0.791333	3.25431	0.243165
ENSGALG00000005180	8	8:11178211-11316534:+1		2.618	10.7711	0.243058
LOC101748581	.	.	polymeric immunoglobulin receptor-like	1.085	4.50338	0.24093
MPZL2	24	24:5442228-5447809:-1	myelin protein zero-like 2	0.842833	3.568	0.23622
ENSGALG00000038754	AADN04010109.1	AADN04010109.1:4447-7640:-1		16.103	69.5013	0.231693
TENM4	1	1:192337888-192596643:+1	teneurin transmembrane protein 4	0.2415	1.05419	0.229085
C2orf82	9	9:1045745-1052220:+1	chromosome 2 open reading frame 82	1.59117	6.95315	0.228841
LOC107049001	.	.	leukocyte immunoglobulin-like receptor subfamily B member 3	1.381	6.05277	0.22816
ENSGALG00000033116	AADN04002035.1	AADN04002035.1:8168-14005:-1		0.256	1.12231	0.228101
TINAGL1	23	23:4973978-4979571:+1	tubulointerstitial nephritis antigen-like 1	0.324	1.42381	0.227559
SELE	.	.	selectin E (endothelial adhesion molecule 1)	0.373667	1.64223	0.227536
PTN	1	1:57724423-57794404:+1	pleiotrophin	0.825333	3.65562	0.225771
SLN	1	1:180517078-180519001:+1	sarcolipin	0.266833	1.18723	0.224753
ENSGALG00000044012	3	3:105434639-105435216:+1		0.230833	1.03658	0.222688
HSD11B1a	.	.	hydroxysteroid (11-beta) dehydrogenase 1a	1.499	6.7365	0.222519
C2orf88	7	7:192383-196571:-1	chromosome 2 open reading frame 88	0.950833	4.28904	0.221689
ENSGALG00000019755	18	18:10510367-10511097:-1		19.9378	90.9099	0.219314
LAT2	.	.	linker for activation of T cells family, member 2	1.49267	6.865	0.217431
ENSGALG00000028858	26	26:3145547-3149510:+1		1.09667	5.11635	0.214346
LOC107049089	.	.	interleukin-23 subunit alpha-like	7.77633	36.6265	0.212314
CHL1	12	12:17238314-17341991:+1	cell adhesion molecule L1-like	4.69683	22.1643	0.211909
ZNF385B	7	7:14980081-15028066:+1	zinc finger protein 385B	1.005	4.83504	0.207858
C7	Z	Z:12937309-12956457:+1	complement C7	0.384833	1.86869	0.205937
ENSGALG00000031956	AADN04000861.1	AADN04000861.1:28734-30164:-1		3.0665	14.9207	0.20552
KCNAB1	9	9:22988102-23016557:-1	potassium voltage-gated channel, shaker-related subfamily, beta member 1	0.365667	1.78223	0.205174
NRN1	2	2:65344349-65351803:+1	neuritin 1	0.960167	4.75138	0.202081
IL19	.	.	interleukin 19	0.279167	1.38696	0.201279
CLDN1	9	9:13990203-14000682:+1	claudin 1	0.468667	2.37592	0.197257
BEST4	8	8:20844355-20848115:-1	bestrophin 4	1.38967	7.22977	0.192215
SALL3	2	2:57106919-57126307:-1	spalt-like transcription factor 3	0.190667	1.05773	0.18026
LOC107050224	.	.	natural cytotoxicity triggering receptor 1-like	0.213833	1.18915	0.17982
ENSGALG00000038876	AADN04006715.1	AADN04006715.1:4936-9671:+1		0.699333	3.93438	0.177749
FAM150B	.	.	family with sequence similarity 150, member B	0.3245	1.82581	0.17773
ENSGALG00000045868	AADN04001687.1	AADN04001687.1:11096-13222:-1		0.226167	1.27362	0.177578
GRIN3A	Z	Z:65006350-65073206:+1	glutamate ionotropic receptor NMDA type subunit 3A	0.3095	1.79819	0.172117
ENSGALG00000001371	18	18:2837333-2861145:+1		0.171167	1.04204	0.164261
OSR1	3	3:101468989-101473526:-1	odd-skipped related transciption factor 1	0.215667	1.31335	0.164212
IFNK	KQ759519.1	KQ759519.1:25908-26462:+1		0.272833	1.70281	0.160226
ENSGALG00000044297	AADN04015857.1	AADN04015857.1:1076-2342:+1		0.407	2.58485	0.157456
LOC100858620	.	.	C-type lectin domain family 2 member L-like	0.227	1.44854	0.15671
TNFRSF9	.	.	tumor necrosis factor receptor superfamily, member 9	9.1865	60.1521	0.152721
ENSGALG00000045675	AADN04005636.1	AADN04005636.1:3729-4217:-1		0.154333	1.01854	0.151524
PPP1R14C	3	3:48472735-48523004:+1	protein phosphatase 1, regulatory (inhibitor) subunit 14C	0.254667	1.70096	0.149719
AvBD8	.	.	avian beta-defensin 8	0.1635	1.12796	0.144952
ENSGALG00000031168	AADN04013079.1	AADN04013079.1:858-5659:-1		0.181333	1.25131	0.144915
ENSGALG00000033847	AADN04009641.1	AADN04009641.1:1738-8427:+1		0.207167	1.44623	0.143246
CCL20	9	9:9539782-9541879:+1	C-C motif chemokine ligand 20	39.3423	281.149	0.139934
ENSGALG00000037683	AADN04006678.1	AADN04006678.1:7506-8933:-1		1.22933	8.83446	0.139152
ENSGALG00000046630	AADN04001974.1	AADN04001974.1:7744-9554:+1		0.213667	1.64692	0.129737
LOC101750594	.	.	beta-microseminoprotein A1-like	1.14967	9.37062	0.122688
MSMB	6	6:17836546-17840466:+1	microseminoprotein beta	1.14967	9.37062	0.122688
CCK	2	2:43988980-43993653:-1	cholecystokinin	1.04817	8.82735	0.118741
ENSGALG00000042090	AADN04004824.1	AADN04004824.1:541-2824:-1		0.121667	1.05362	0.115475
ENSGALG00000045501	AADN04002385.1	AADN04002385.1:3404-5554:+1		0.319667	2.84508	0.112358
GALNT14	3	3:7780875-7845223:+1	UDP-N-acetyl-alpha-D-galactosamine:polypeptide N-acetylgalactosaminyltransferase 14 (GalNAc-T14)	0.232667	2.23412	0.104143
LOC101750245	.	.	interferon kappa-like	0.583333	5.80569	0.100476
SLC12A2	Z	Z:56691802-56743665:+1	solute carrier family 12 (sodium/potassium/chloride transporter), member 2	0.426167	4.43323	0.09613
LOC426070	.	.	immunoglobulin superfamily member 1-like	0.191667	2.065	0.0928168
ENSGALG00000035803	1	1:192940017-192941458:+1		0.193	2.08312	0.0926497
LOC107057238	.	.	C-C motif chemokine 3-like	0.3315	3.65019	0.0908171
LOC772271	.	.	aldo-keto reductase family 1 member B10-like	0.273	3.10562	0.0879053
ENSGALG00000044490	AADN04000989.1	AADN04000989.1:19719-21333:-1		0.1435	1.78908	0.080209
IFNG	1	1:35053221-35057370:-1	interferon gamma	0.399333	5.11504	0.0780704
RBP4	6	6:20385382-20390788:+1	retinol binding protein 4	0.138667	2.00304	0.0692282
LAMP5	3	3:13942840-13952475:-1	lysosomal associated membrane protein family member 5	0.462833	6.86112	0.0674574
HTR1E	3	3:76904838-76905953:-1	5-hydroxytryptamine receptor 1E	0.219833	4.3095	0.0510113
ENSGALG00000032887	AADN04001138.1	AADN04001138.1:12852-14668:+1		0.0618333	1.35342	0.0456866
LOC107052494	.	.	GTPase IMAP family member 7-like	0.671	15.2293	0.0440599
ENSGALG00000031792	AADN04006459.1	AADN04006459.1:7007-8909:+1		0.0458333	1.10292	0.0415562
ENSGALG00000034792	AADN04001974.1	AADN04001974.1:13901-15002:-1		0.0498333	1.35412	0.0368014
ETHE1	.	.	ethylmalonic encephalopathy 1	0.0173333	1.16558	0.014871
ENSGALG00000045656	AADN04004634.1	AADN04004634.1:3602-11659:-1		0.269	20.713	0.012987
TMEM233	15	15:9703185-9709834:-1	transmembrane protein 233	0.0133333	1.24885	0.0106765
IL4	13	13:17043941-17045665:+1	interleukin 4 precursor	0.00816667	12.0113	0.000679917
ENSGALG00000036299	AADN04001249.1	AADN04001249.1:6291-8761:-1		0	1.01558	0
ENSGALG00000040577	AADN04004889.1	AADN04004889.1:6006-7439:+1		0	1.68215	0
ENSGALG00000029452	AADN04004665.1	AADN04004665.1:7758-10216:+1		0	1.78069	0
TRAM1	.	.	translocation associated membrane protein 1	0	2.81	0
ENSGALG00000039158	AADN04012763.1	AADN04012763.1:562-3501:+1		0	3.24562	0
ENSGALG00000044075	AADN04004223.1	AADN04004223.1:4668-5036:+1		0	3.86515	0
ENSGALG00000044377	AADN04003187.1	AADN04003187.1:6902-7270:+1		0	3.86515	0
ENSGALG00000044448	AADN04009122.1	AADN04009122.1:5305-5673:+1		0	3.86515	0
ENSGALG00000046195	AADN04003650.1	AADN04003650.1:10019-10387:+1		0	3.86515	0
ADAMDEC1	22	22:1049690-1067955:-1	ADAM like decysin 1	0	6.63954	0
